# Supplementary material for: Radioimmunotherapy in Non-Hodgkin’s Lymphoma: Retrospective Adverse Event Profiling of Zevalin and Bexxar
Source: Pharmaceuticals (Basel). 2019 Sep 20;12(4):141. doi: 10.3390/ph12040141 (PMC6958320; doi:10.3390/ph12040141)
Supplement: Supplementary file 1 [file pharmaceuticals-12-00141-s001.xlsx]

## Sheet: Bexxar.Data.FAERS.Stats
CONCEPT	NAME	CONCEPT_AES_IN_COHORT	PRR	PRR_95CI(-)	PRR_95CI(+)	P-value Fisher Exact Test (two tailed)	COHORT_%COVERAGE
Concept Drug	Tositumomab	290	N/A	N/A	N/A	N/A	100
Concept Drug	Sodium iodide	103	1090.4	929.376	1279.32	0	35.5172
Concept Drug	Cyclophosphamide	48	18.2679	14.1061	23.6574	0	16.5517
Concept Drug	Prednisone	44	6.41725	4.88813	8.42472	0	15.1724
Concept Drug	Rituximab	43	20.0185	15.1908	26.3805	0	14.8276
Concept Drug	Vincristine	41	31.8271	23.9625	42.273	0	14.1379
Concept Drug	Doxorubicin	35	20.3415	14.9075	27.7562	0	12.069
Concept Drug	Potassium Iodide	25	348.18	238.747	507.773	0	8.62069
Concept Drug	Acetaminophen	19	1.31936	0.85424	2.03772	0.22136	6.55172
Concept Drug	Fludarabine	14	25.881	15.5215	43.1548	0	4.82759
Concept Drug	Levothyroxine	14	1.53375	0.92005	2.55681	0.12545	4.82759
Concept Drug	Folic Acid	13	1.78461	1.04907	3.03588	0.03868	4.48276
Concept Drug	Diphenhydramine	10	3.82101	2.07808	7.02577	0.00036	3.44828
Concept Drug	Omeprazole	10	1.29812	0.70601	2.38682	0.35987	3.44828
Concept Drug	Etoposide	9	10.1252	5.32168	19.2645	0	3.10345
Concept Drug	Lorazepam	9	2.72907	1.4345	5.19195	0.00655	3.10345
Concept Drug	Vitamin E	9	2.46931	1.29796	4.69776	0.012	3.10345
Concept Drug	Niacin	9	2.35407	1.23739	4.4785	0.01587	3.10345
Concept Drug	Vitamin C	9	1.98248	1.04207	3.77156	0.05113	3.10345
Concept Drug	Warfarin	9	1.71845	0.90329	3.26924	0.1149	3.10345
Concept Drug	Acetylsalicylic acid	9	0.6022	0.31654	1.14562	0.14178	3.10345
Concept Drug	Ethanol	8	10.3377	5.21911	20.4764	0	2.75862
Concept Drug	Fluoride ion	8	4.42697	2.23517	8.76802	0.00054	2.75862
Concept Drug	Vitamin A	8	2.45497	1.23954	4.86217	0.0179	2.75862
Concept Drug	Riboflavin	8	2.39278	1.20814	4.73899	0.02048	2.75862
Concept Drug	Thiamine	8	2.27392	1.14813	4.50359	0.02662	2.75862
Concept Drug	Pyridoxine	8	2.05697	1.03859	4.0739	0.0636	2.75862
Concept Drug	Nicotinamide	8	1.90803	0.96339	3.7789	0.07671	2.75862
Concept Drug	Cyanocobalamin	8	1.63982	0.82797	3.24769	0.16273	2.75862
Concept Drug	Oxycodone	8	1.55772	0.78652	3.08509	0.18108	2.75862
Concept Drug	Vitamin D	8	1.34021	0.6767	2.65431	0.40149	2.75862
Concept Drug	Metoprolol	8	1.18515	0.59841	2.34721	0.55742	2.75862
Concept Drug	Cholecalciferol	8	1.08279	0.54672	2.14447	0.71006	2.75862
Concept Drug	Bortezomib	7	5.71733	2.75002	11.8864	0.00027	2.41379
Concept Drug	Phenylephrine	7	5.12779	2.46648	10.6607	0.00051	2.41379
Concept Drug	Aciclovir	7	4.396	2.11451	9.13918	0.00125	2.41379
Concept Drug	Sodium Iodide I-131	6	225.004	101.592	498.335	0	2.06897
Concept Drug	Digoxin	6	3.10749	1.40765	6.85999	0.01387	2.06897
Concept Drug	Hydrocodone	6	1.36029	0.61621	3.00287	0.46282	2.06897
Concept Drug	Furosemide	6	0.85234	0.38611	1.88154	0.84918	2.06897
Concept Drug	molecular iodine	5	106.811	44.7189	255.12	0	1.72414
Concept Drug	Povidone-iodine	5	17.7604	7.44645	42.3602	1e-05	1.72414
Concept Drug	Valaciclovir	5	4.68183	1.96338	11.1642	0.00471	1.72414
Concept Drug	Clopidogrel	5	1.22109	0.5121	2.91162	0.61226	1.72414
Concept Drug	L-Carnitine	4	49.9327	18.8509	132.263	0	1.37931
Concept Drug	Cefepime	4	16.7152	6.31419	44.2492	0.00011	1.37931
Concept Drug	Levosalbutamol	4	1.91243	0.72262	5.06131	0.15916	1.37931
Concept Drug	Allopurinol	4	1.54442	0.58357	4.08734	0.33557	1.37931
Concept Drug	Simvastatin	4	0.60321	0.22793	1.59637	0.42843	1.37931
Concept Drug	Salbutamol	4	0.63693	0.24067	1.68562	0.54053	1.37931
Concept Drug	Zolpidem	4	1.2698	0.4798	3.36053	0.56278	1.37931
Concept Drug	Ibritumomab	3	69.029	22.3619	213.086	1e-05	1.03448
Concept Drug	Lipoic Acid	3	43.4344	14.078	134.007	5e-05	1.03448
Concept Drug	Mitoxantrone	3	18.6993	6.06394	57.6626	0.00061	1.03448
Concept Drug	Calcium gluconate	3	13.4079	4.3485	41.3413	0.00157	1.03448
Concept Drug	Ifosfamide	3	10.5134	3.40995	32.4146	0.00311	1.03448
Concept Drug	Cytarabine	3	3.8255	1.24094	11.793	0.04496	1.03448
Concept Drug	Filgrastim	3	3.80817	1.23532	11.7396	0.04546	1.03448
Concept Drug	Pegfilgrastim	3	2.90789	0.9433	8.9641	0.0859	1.03448
Concept Drug	Carboplatin	3	2.2687	0.73596	6.99358	0.14771	1.03448
Concept Drug	Amiodarone	3	2.2585	0.73265	6.96212	0.14911	1.03448
Concept Drug	Sulfamethoxazole	3	1.84603	0.59885	5.6906	0.22289	1.03448
Concept Drug	Docusate	3	1.78594	0.57936	5.50535	0.23722	1.03448
Concept Drug	Pravastatin	3	1.57382	0.51055	4.85144	0.44558	1.03448
Concept Drug	Cetirizine	3	1.47117	0.47725	4.535	0.46317	1.03448
Concept Drug	Conjugated Estrogens	3	1.40784	0.45671	4.33978	0.47664	1.03448
Concept Drug	Spironolactone	3	1.39714	0.45324	4.30679	0.47913	1.03448
Concept Drug	Trimethoprim	3	1.36694	0.44344	4.21371	0.48653	1.03448
Concept Drug	Potassium	3	1.34667	0.43687	4.15121	0.4918	1.03448
Concept Drug	Vindesine	2	64.1367	16.0909	255.643	0.00048	0.68966
Concept Drug	Skeletal targeted radiotherapy	2	22.5652	5.66719	89.8481	0.0037	0.68966
Concept Drug	Calcium	2	0.20866	0.05243	0.83035	0.00752	0.68966
Concept Drug	Calcium Citrate	2	12.1651	3.05604	48.4252	0.01209	0.68966
Concept Drug	Clotrimazole	2	8.14797	2.04709	32.4311	0.02557	0.68966
Concept Drug	Isopropyl Alcohol	2	5.27692	1.32587	21.002	0.05592	0.68966
Concept Drug	Epirubicin	2	5.25017	1.31915	20.8955	0.05642	0.68966
Concept Drug	Sotalol	2	5.18668	1.3032	20.6428	0.05764	0.68966
Concept Drug	Lisinopril	2	0.31457	0.07905	1.25183	0.10324	0.68966
Concept Drug	Hydrochlorothiazide	2	0.34664	0.08711	1.37945	0.13812	0.68966
Concept Drug	Glucosamine	2	3.03556	0.76275	12.0808	0.14152	0.68966
Concept Drug	Finasteride	2	2.63226	0.66142	10.4756	0.17674	0.68966
Concept Drug	Gabapentin	2	0.38252	0.09612	1.52225	0.18669	0.68966
Concept Drug	Temazepam	2	2.45313	0.61641	9.7627	0.19663	0.68966
Concept Drug	Guaifenesin	2	2.17464	0.54644	8.65435	0.2347	0.68966
Concept Drug	Lenalidomide	2	0.41217	0.10357	1.64022	0.25207	0.68966
Concept Drug	Propranolol	2	1.7843	0.44836	7.10083	0.30871	0.68966
Concept Drug	Fluconazole	2	1.77898	0.44702	7.07966	0.30994	0.68966
Concept Drug	Dexamethasone	2	0.45609	0.11461	1.81499	0.33774	0.68966
Concept Drug	Darbepoetin alfa	2	1.63076	0.40978	6.48977	0.34709	0.68966
Concept Drug	Cisplatin	2	1.56923	0.39432	6.24491	0.36435	0.68966
Concept Drug	Rosiglitazone	2	0.52992	0.13316	2.10883	0.59803	0.68966
Concept Drug	Trazodone	2	1.07751	0.27076	4.28799	0.7098	0.68966
Concept Drug	Methylprednisolone	2	1.02511	0.2576	4.07949	0.72266	0.68966
Concept Drug	Metoclopramide	2	1.01686	0.25552	4.04662	0.72481	0.68966
Concept Drug	Sertraline	2	0.6369	0.16005	2.53456	0.77551	0.68966
Concept Drug	Tramadol	2	0.61822	0.15535	2.46021	0.77677	0.68966
Concept Drug	Diazepam	2	0.88914	0.22343	3.53837	1	0.68966
Concept Drug	Escitalopram	2	0.87391	0.2196	3.47777	1	0.68966
Concept Drug	Ondansetron	2	0.83785	0.21054	3.33425	1	0.68966
Concept Drug	Lamotrigine	2	0.82756	0.20795	3.29329	1	0.68966
Concept Drug	Ranitidine	2	0.7802	0.19605	3.10482	1	0.68966
Concept Drug	Morphine	2	0.74682	0.18767	2.97199	1	0.68966
Concept Drug	Celecoxib	2	0.73282	0.18415	2.91629	1	0.68966
Concept Drug	Bupropion	2	0.70985	0.17838	2.82485	1	0.68966
Concept Drug	Lansoprazole	2	0.69761	0.1753	2.77614	1	0.68966
Concept Drug	Metformin	1	0.11706	0.01654	0.82821	0.00282	0.34483
Concept Drug	Yttrium Y-90	1	228.754	32.0683	1631.79	0.0044	0.34483
Concept Drug	Atorvastatin	1	0.12984	0.01835	0.91869	0.00885	0.34483
Concept Drug	2,6-DICARBOXYNAPHTHALENE	1	74.3917	10.4863	527.749	0.01339	0.34483
Concept Drug	Methotrexate	1	0.14556	0.02057	1.02986	0.01784	0.34483
Concept Drug	Plerixafor	1	51.7934	7.30672	367.136	0.01916	0.34483
Concept Drug	Dexrazoxane	1	49.91	7.0415	353.762	0.01987	0.34483
Concept Drug	Pentostatin	1	39.6684	5.59861	281.066	0.02493	0.34483
Concept Drug	Gamma Hydroxybutyric Acid	1	28.7139	4.05414	203.37	0.03426	0.34483
Concept Drug	Propylthiouracil	1	24.2068	3.41833	171.42	0.04051	0.34483
Concept Drug	Pentazocine	1	17.3848	2.45556	123.08	0.05594	0.34483
Concept Drug	Aminophylline	1	17.1566	2.42335	121.463	0.05666	0.34483
Concept Drug	Decitabine	1	14.4629	2.04306	102.383	0.06685	0.34483
Concept Drug	Ibuprofen	1	0.19992	0.02826	1.41452	0.06984	0.34483
Concept Drug	Brentuximab vedotin	1	13.1531	1.85813	93.1067	0.07325	0.34483
Concept Drug	Chlorambucil	1	12.6734	1.79039	89.7092	0.07592	0.34483
Concept Drug	Carmustine	1	12.3373	1.74293	87.3294	0.0779	0.34483
Concept Drug	Famciclovir	1	12.0927	1.7084	85.5974	0.07941	0.34483
Concept Drug	Ofatumumab	1	11.5435	1.63084	81.7083	0.08303	0.34483
Concept Drug	Methyldopa	1	8.3133	1.17462	58.8371	0.11339	0.34483
Concept Drug	Methotrimeprazine	1	8.20398	1.15918	58.0631	0.11481	0.34483
Concept Drug	Idelalisib	1	7.4675	1.05514	52.8493	0.12539	0.34483
Concept Drug	Pramocaine	1	7.14485	1.00956	50.5653	0.13067	0.34483
Concept Drug	Nadolol	1	5.64245	0.79732	39.9304	0.16248	0.34483
Concept Drug	Heroin	1	5.0628	0.71543	35.8276	0.17932	0.34483
Concept Drug	Cimetidine	1	4.79653	0.6778	33.943	0.18827	0.34483
Concept Drug	Benzonatate	1	4.7443	0.67043	33.5733	0.19014	0.34483
Concept Drug	Meperidine	1	4.5614	0.64458	32.2788	0.19696	0.34483
Concept Drug	Nabumetone	1	4.44759	0.6285	31.4733	0.20145	0.34483
Concept Drug	Pantoprazole	1	0.24608	0.03478	1.74111	0.20145	0.34483
Concept Drug	Alprazolam	1	0.24411	0.0345	1.72717	0.20274	0.34483
Concept Drug	Daunorubicin	1	4.20569	0.59432	29.7612	0.21172	0.34483
Concept Drug	Cocaine	1	3.972	0.56131	28.1073	0.22268	0.34483
Concept Drug	Itraconazole	1	3.8216	0.54005	27.0428	0.23035	0.34483
Concept Drug	Quinine	1	3.69107	0.52161	26.1191	0.23745	0.34483
Concept Drug	Megestrol	1	3.57615	0.50537	25.3058	0.24406	0.34483
Concept Drug	Atenolol	1	0.30027	0.04244	2.12455	0.27296	0.34483
Concept Drug	Ribavirin	1	0.29649	0.0419	2.09779	0.2732	0.34483
Concept Drug	Rosuvastatin	1	0.29599	0.04183	2.09427	0.27325	0.34483
Concept Drug	Dicyclomine	1	2.70049	0.38164	19.1088	0.30966	0.34483
Concept Drug	Granisetron	1	2.67028	0.37737	18.895	0.31255	0.34483
Concept Drug	Sucralfate	1	2.61883	0.3701	18.5309	0.31759	0.34483
Concept Drug	Oxazepam	1	2.54101	0.3591	17.9802	0.32554	0.34483
Concept Drug	Gemfibrozil	1	2.53983	0.35894	17.9719	0.32566	0.34483
Concept Drug	Nitrofurantoin	1	2.46835	0.34884	17.466	0.33332	0.34483
Concept Drug	Quinapril	1	2.33066	0.32938	16.4916	0.34911	0.34483
Concept Drug	Nystatin	1	2.19148	0.30971	15.5067	0.36663	0.34483
Concept Drug	Losartan	1	0.32836	0.04641	2.32326	0.38246	0.34483
Concept Drug	Prednisolone	1	0.32819	0.04638	2.32207	0.3825	0.34483
Concept Drug	Fentanyl	1	0.31262	0.04418	2.2119	0.38814	0.34483
Concept Drug	Thyroid extract	1	2.02707	0.28648	14.3432	0.38968	0.34483
Concept Drug	Melphalan	1	1.99771	0.28233	14.1355	0.3941	0.34483
Concept Drug	Raloxifene	1	1.94878	0.27541	13.7893	0.40168	0.34483
Concept Drug	Cephalexin	1	1.92311	0.27179	13.6076	0.40577	0.34483
Concept Drug	Carisoprodol	1	1.90377	0.26905	13.4708	0.4089	0.34483
Concept Drug	Lovastatin	1	1.51778	0.2145	10.7394	0.48296	0.34483
Concept Drug	Lactulose	1	1.48037	0.20922	10.4747	0.49151	0.34483
Concept Drug	Tizanidine	1	1.44385	0.20406	10.2163	0.50015	0.34483
Concept Drug	Cefuroxime	1	1.40916	0.19916	9.97084	0.50862	0.34483
Concept Drug	Risedronate	1	1.3892	0.19633	9.82955	0.51362	0.34483
Concept Drug	Triamterene	1	1.37068	0.19372	9.69849	0.51834	0.34483
Concept Drug	Doxazosin	1	1.34687	0.19035	9.53003	0.52452	0.34483
Concept Drug	Fluoxetine	1	0.40406	0.05711	2.85894	0.52775	0.34483
Concept Drug	Carvedilol	1	0.39874	0.05635	2.82123	0.52799	0.34483
Concept Drug	Paroxetine	1	0.38389	0.05426	2.71617	0.52971	0.34483
Concept Drug	Potassium Chloride	1	0.37166	0.05253	2.62963	0.53244	0.34483
Concept Drug	Citalopram	1	0.35332	0.04994	2.49987	0.53909	0.34483
Concept Drug	2-(4-(2-HYDROXY-3-(ISOPROPYLAMINO)PROPOXY)PHENYL)ETHANAMIDE	1	0.35147	0.04968	2.48684	0.53994	0.34483
Concept Drug	Clarithromycin	1	1.2855	0.18168	9.09577	0.54112	0.34483
Concept Drug	Doxycycline	1	1.24436	0.17586	8.80466	0.55281	0.34483
Concept Drug	Lithium	1	1.19908	0.16947	8.48428	0.56621	0.34483
Concept Drug	Prochlorperazine	1	1.15198	0.16281	8.151	0.58079	0.34483
Concept Drug	Everolimus	1	1.15058	0.16261	8.14109	0.58124	0.34483
Concept Drug	Oxybutynin	1	1.11001	0.15688	7.85402	0.59437	0.34483
Concept Drug	Rabeprazole	1	1.10813	0.15661	7.8407	0.59499	0.34483
Concept Drug	Thalidomide	1	1.07053	0.1513	7.57467	0.60767	0.34483
Concept Drug	Intravenous Immunoglobulin	1	1.06501	0.15052	7.53558	0.60957	0.34483
Concept Drug	(3R)-N-methyl-3-phenyl-3-[4-(trifluoromethyl)phenoxy]propan-1-amine	1	1.03912	0.14686	7.35244	0.61862	0.34483
Concept Drug	(3S)-N-methyl-3-phenyl-3-[4-(trifluoromethyl)phenoxy]propan-1-amine	1	1.03912	0.14686	7.35244	0.61862	0.34483
Concept Drug	Iron	1	0.47427	0.06703	3.35572	0.72916	0.34483
Concept Drug	Ramipril	1	0.41187	0.05821	2.91419	0.73916	0.34483
Concept Drug	Hydroxyzine	1	0.94598	0.1337	6.69339	1	0.34483
Concept Drug	Loperamide	1	0.94096	0.13299	6.65783	1	0.34483
Concept Drug	Azithromycin	1	0.90782	0.1283	6.42333	1	0.34483
Concept Drug	Promethazine	1	0.89418	0.12638	6.32686	1	0.34483
Concept Drug	Clonidine	1	0.8828	0.12477	6.24629	1	0.34483
Concept Drug	Mometasone	1	0.87472	0.12363	6.18916	1	0.34483
Concept Drug	Senna glycoside	1	0.85678	0.12109	6.06224	1	0.34483
Concept Drug	Codeine	1	0.83737	0.11835	5.92484	1	0.34483
Concept Drug	Mirtazapine	1	0.73075	0.10328	5.17043	1	0.34483
Concept Drug	Enalapril	1	0.70206	0.09922	4.96744	1	0.34483
Concept Drug	Nitroglycerin	1	0.68673	0.09706	4.85895	1	0.34483
Concept Drug	Ardeparin	1	0.68414	0.09669	4.84067	1	0.34483
Concept Drug	Fexofenadine	1	0.61249	0.08656	4.33367	1	0.34483
Concept Drug	Diltiazem	1	0.55319	0.07818	3.91411	1	0.34483
Concept Drug	Omega-3-carboxylic acids	1	0.5483	0.07749	3.87948	1	0.34483
Concept Drug	Ciprofloxacin	1	0.54471	0.07699	3.85407	1	0.34483
Concept Drug	Tamsulosin	1	0.52191	0.07376	3.69279	1	0.34483
Indication	NON-HODGKIN'S LYMPHOMA	180	490.091	446.985	537.353	0	62.069
Indication	DRUG USE FOR UNKNOWN INDICATION	23	2.85536	1.92905	4.22646	1e-05	7.93103
Indication	DIFFUSE LARGE B-CELL LYMPHOMA	19	65.0081	42.068	100.458	0	6.55172
Indication	LYMPHOMA	17	65.0759	41.0072	103.271	0	5.86207
Indication	B-CELL LYMPHOMA	17	63.6556	40.1127	101.016	0	5.86207
Indication	PRODUCT USED FOR UNKNOWN INDICATION	9	0.17146	0.09013	0.32618	0	3.10345
Indication	MULTIPLE MYELOMA	7	4.9317	2.37216	10.2529	0.00064	2.41379
Indication	PROPHYLAXIS	5	1.63486	0.68563	3.89826	0.23999	1.72414
Indication	B-CELL SMALL LYMPHOCYTIC LYMPHOMA	2	138.99	34.8044	555.051	0.0001	0.68966
Indication	MANTLE CELL LYMPHOMA	2	10.5823	2.65853	42.123	0.01573	0.68966
Indication	DEEP VEIN THROMBOSIS	2	2.70702	0.6802	10.7732	0.1693	0.68966
Indication	CHRONIC LYMPHOCYTIC LEUKAEMIA	2	2.6466	0.66502	10.5327	0.17528	0.68966
Indication	PREMEDICATION	2	2.36123	0.59332	9.39696	0.20813	0.68966
Indication	BLOOD STEM CELL TRANSPLANT FAILURE	1	27450.5	1721.02	437840	7e-05	0.34483
Indication	FOLLICLE CENTRE LYMPHOMA, FOLLICULAR GRADE I, II, III STAGE IV	1	623.876	86.2412	4513.17	0.00164	0.34483
Indication	PLATELET COUNT ABNORMAL	1	596.751	82.5708	4312.8	0.00171	0.34483
Indication	B-CELL LYMPHOMA RECURRENT	1	319.192	44.6027	2284.25	0.00316	0.34483
Indication	DRUG INEFFECTIVE	1	207.959	29.1746	1482.34	0.00483	0.34483
Indication	NON-HODGKIN'S LYMPHOMA STAGE IV	1	198.917	27.9151	1417.44	0.00505	0.34483
Indication	SKIN LESION	1	55.5679	7.83814	393.944	0.01787	0.34483
Indication	DEPRESSION	1	0.15713	0.02221	1.11173	0.02481	0.34483
Indication	ACCIDENTAL EXPOSURE	1	17.6531	2.49343	124.981	0.05511	0.34483
Indication	OEDEMA PERIPHERAL	1	8.35887	1.18105	59.1596	0.11281	0.34483
Indication	BONE MARROW CONDITIONING REGIMEN	1	6.32646	0.89395	44.7721	0.14627	0.34483
Indication	IMMUNOSUPPRESSANT DRUG THERAPY	1	4.89751	0.69207	34.6577	0.18477	0.34483
Indication	PRURITUS	1	3.95313	0.55864	27.9737	0.22361	0.34483
Indication	INFECTION PROPHYLAXIS	1	3.12151	0.44113	22.0882	0.27426	0.34483
Indication	CHEMOTHERAPY	1	2.83346	0.40043	20.0497	0.29754	0.34483
Indication	COUGH	1	2.13839	0.30221	15.131	0.37378	0.34483
Indication	ANXIETY	1	0.33748	0.0477	2.38784	0.38087	0.34483
Indication	SEASONAL ALLERGY	1	2.06566	0.29193	14.6163	0.38402	0.34483
Indication	THYROID DISORDER	1	1.40859	0.19907	9.96675	0.50876	0.34483
Reaction	Myelodysplastic syndrome	46	168.656	129.259	220.06	0	15.8621
Reaction	Pyrexia	30	5.29582	3.77368	7.43192	0	10.3448
Reaction	Acute myeloid leukaemia	22	89.3757	59.7657	133.655	0	7.58621
Reaction	Disease progression	22	13.0677	8.74368	19.5301	0	7.58621
Reaction	Fatigue	22	2.0812	1.39267	3.11016	0.00136	7.58621
Reaction	Dyspnoea	21	2.3674	1.56806	3.57419	0.00041	7.24138
Reaction	Nausea	18	1.44232	0.92204	2.25619	0.11086	6.2069
Reaction	Anaemia	17	5.09932	3.21503	8.08797	0	5.86207
Reaction	Thrombocytopenia	16	9.32977	5.79407	15.0231	0	5.51724
Reaction	Pancytopenia	14	14.7589	8.85225	24.6068	0	4.82759
Reaction	Hypotension	14	4.41058	2.64569	7.3528	1e-05	4.82759
Reaction	Febrile neutropenia	13	14.7164	8.64973	25.0379	0	4.48276
Reaction	Neutropenia	13	8.1741	4.80476	13.9062	0	4.48276
Reaction	Chills	13	6.66536	3.91798	11.3393	0	4.48276
Reaction	Lymphadenopathy	12	20.4005	11.7209	35.5076	0	4.13793
Reaction	Malignant neoplasm progression	12	10.9506	6.2922	19.058	0	4.13793
Reaction	Pneumonia	12	2.5552	1.46834	4.44656	0.00309	4.13793
Reaction	Vomiting	12	1.58348	0.90995	2.75554	0.13511	4.13793
Reaction	Dizziness	12	1.46298	0.84071	2.54585	0.20949	4.13793
Reaction	Infusion related reaction	11	14.8761	8.33072	26.5643	0	3.7931
Reaction	Rash	11	1.91346	1.0717	3.41638	0.03464	3.7931
Reaction	Platelet count decreased	10	6.15524	3.34748	11.3181	1e-05	3.44828
Reaction	Back pain	10	2.67341	1.45397	4.91558	0.0049	3.44828
Reaction	Arthralgia	10	1.78092	0.96859	3.27453	0.08132	3.44828
Reaction	Drug ineffective	10	0.60564	0.32939	1.11355	0.12606	3.44828
Reaction	Asthenia	10	1.65125	0.89806	3.03611	0.14333	3.44828
Reaction	Pleural effusion	9	8.14153	4.27919	15.49	0	3.10345
Reaction	Cardiac failure congestive	9	4.19562	2.20532	7.98214	0.00037	3.10345
Reaction	Decreased appetite	9	2.45206	1.28889	4.66493	0.01251	3.10345
Reaction	Weight decreased	9	2.14797	1.12905	4.08639	0.04128	3.10345
Reaction	Pain in extremity	9	1.79634	0.94423	3.41743	0.10598	3.10345
Reaction	Non-Hodgkin's lymphoma	8	83.7225	42.2286	165.988	0	2.75862
Reaction	Lymphoma	8	31.1142	15.7042	61.6456	0	2.75862
Reaction	White blood cell count decreased	8	5.16327	2.60691	10.2264	0.0002	2.75862
Reaction	Infection	8	4.15107	2.09588	8.22155	0.00082	2.75862
Reaction	Chest pain	8	2.24878	1.13544	4.45378	0.02816	2.75862
Reaction	Pruritus	8	1.7507	0.88396	3.4673	0.14716	2.75862
Reaction	Death	8	0.64423	0.32529	1.2759	0.24476	2.75862
Reaction	Bone marrow failure	7	16.9927	8.1722	35.3335	0	2.41379
Reaction	Upper respiratory tract infection	7	9.86415	4.74437	20.5088	1e-05	2.41379
Reaction	Anaphylactic reaction	7	9.34827	4.49627	19.4361	1e-05	2.41379
Reaction	Respiratory failure	7	5.39091	2.59303	11.2077	0.00038	2.41379
Reaction	Dehydration	7	2.86698	1.37907	5.96026	0.01225	2.41379
Reaction	Oedema peripheral	7	1.68814	0.81203	3.50946	0.20494	2.41379
Reaction	Diarrhoea	7	0.81445	0.39177	1.69313	0.72893	2.41379
Reaction	Leukopenia	6	7.84077	3.55152	17.3102	0.00014	2.06897
Reaction	Herpes zoster	6	7.22794	3.27397	15.9571	0.00022	2.06897
Reaction	Oropharyngeal pain	6	3.91749	1.77455	8.64823	0.00478	2.06897
Reaction	Sepsis	6	3.26785	1.48029	7.21403	0.01107	2.06897
Reaction	Haemoglobin decreased	6	3.19998	1.44955	7.06419	0.01217	2.06897
Reaction	Headache	6	0.61537	0.27876	1.35841	0.32415	2.06897
Reaction	Pain	6	0.7116	0.32236	1.57084	0.48622	2.06897
Reaction	Cytogenetic abnormality	5	179.885	75.2246	430.162	0	1.72414
Reaction	Atelectasis	5	22.1375	9.28099	52.8036	0	1.72414
Reaction	Myocardial ischaemia	5	16.0774	6.74098	38.3449	2e-05	1.72414
Reaction	Cellulitis	5	6.01194	2.52112	14.3363	0.00163	1.72414
Reaction	Cardio-respiratory arrest	5	5.69088	2.38649	13.5706	0.00207	1.72414
Reaction	Neuropathy peripheral	5	4.01194	1.68247	9.56671	0.00885	1.72414
Reaction	Dysphagia	5	3.28497	1.37762	7.83311	0.01932	1.72414
Reaction	Chest discomfort	5	3.20295	1.34322	7.63751	0.02126	1.72414
Reaction	Flushing	5	2.35235	0.98652	5.60917	0.064	1.72414
Reaction	Nasopharyngitis	5	2.01629	0.84559	4.8078	0.10529	1.72414
Reaction	Erythema	5	1.96429	0.82378	4.6838	0.1141	1.72414
Reaction	Myalgia	5	1.7547	0.73589	4.18403	0.21627	1.72414
Reaction	Cough	5	1.33735	0.56086	3.18886	0.43107	1.72414
Reaction	Abdominal pain	5	1.31518	0.55157	3.136	0.43791	1.72414
Reaction	Fall	5	0.95154	0.39906	2.2689	1	1.72414
Reaction	Blood lactate dehydrogenase increased	4	10.6048	4.00642	28.0704	0.00061	1.37931
Reaction	Cardiovascular disorder	4	5.36038	2.02531	14.1873	0.00707	1.37931
Reaction	Rash generalised	4	5.29805	2.00176	14.0223	0.00736	1.37931
Reaction	Gastrointestinal disorder	4	4.06388	1.53549	10.7556	0.01784	1.37931
Reaction	Syncope	4	2.26981	0.85765	6.00718	0.10214	1.37931
Reaction	Renal failure	4	1.84222	0.69609	4.87551	0.17443	1.37931
Reaction	Drug hypersensitivity	4	1.73378	0.65512	4.5885	0.30017	1.37931
Reaction	Urticaria	4	1.65734	0.62623	4.38619	0.31219	1.37931
Reaction	Paraesthesia	4	1.43264	0.54133	3.79151	0.36654	1.37931
Reaction	Human anti-mouse antibody positive	3	11764.5	3057.09	45273	0	1.03448
Reaction	Chronic myelomonocytic leukaemia	3	268.246	86.5414	831.463	0	1.03448
Reaction	Serum sickness	3	54.0365	17.5105	166.753	3e-05	1.03448
Reaction	Odynophagia	3	31.8698	10.3322	98.3033	0.00013	1.03448
Reaction	Refusal of treatment by patient	3	18.2476	5.91753	56.2694	0.00065	1.03448
Reaction	Blood albumin decreased	3	16.8236	5.4559	51.8767	0.00082	1.03448
Reaction	Ejection fraction decreased	3	12.8896	4.18043	39.7426	0.00175	1.03448
Reaction	Peripheral coldness	3	12.7047	4.12047	39.1723	0.00183	1.03448
Reaction	Ear pain	3	9.94704	3.22629	30.668	0.00363	1.03448
Reaction	Disease recurrence	3	7.96591	2.58382	24.5589	0.00668	1.03448
Reaction	Throat tightness	3	6.62736	2.14971	20.4316	0.01098	1.03448
Reaction	Colitis	3	6.58286	2.13527	20.2944	0.01118	1.03448
Reaction	Dyspnoea exertional	3	6.49	2.10516	20.0081	0.01161	1.03448
Reaction	Hypophagia	3	5.8559	1.8995	18.053	0.01524	1.03448
Reaction	Neutrophil count decreased	3	5.7133	1.85325	17.6133	0.01626	1.03448
Reaction	Hypoxia	3	5.61858	1.82253	17.3212	0.01698	1.03448
Reaction	Productive cough	3	5.45266	1.76871	16.8097	0.01837	1.03448
Reaction	Blood bilirubin increased	3	5.1518	1.67113	15.8821	0.02128	1.03448
Reaction	Blood alkaline phosphatase increased	3	5.08877	1.65069	15.6877	0.02196	1.03448
Reaction	Hyperglycaemia	3	4.60245	1.49295	14.1883	0.02838	1.03448
Reaction	Skin discolouration	3	4.27756	1.38757	13.1867	0.03412	1.03448
Reaction	Oedema	3	3.06128	0.99306	9.43697	0.07635	1.03448
Reaction	Feeling hot	3	2.81111	0.91191	8.66574	0.09274	1.03448
Reaction	Lethargy	3	2.81035	0.91166	8.66337	0.0928	1.03448
Reaction	Blood pressure decreased	3	2.65163	0.86017	8.17406	0.10564	1.03448
Reaction	Aspartate aminotransferase increased	3	2.62074	0.85016	8.07885	0.10841	1.03448
Reaction	Malaise	3	0.42344	0.13737	1.30527	0.17695	1.03448
Reaction	Atrial fibrillation	3	1.94409	0.63066	5.99288	0.20176	1.03448
Reaction	Sinusitis	3	1.93969	0.62924	5.97932	0.20265	1.03448
Reaction	Dyspepsia	3	1.87769	0.60912	5.78818	0.21577	1.03448
Reaction	Influenza like illness	3	1.85147	0.60062	5.70736	0.22164	1.03448
Reaction	Heart rate increased	3	1.83517	0.59533	5.65712	0.22539	1.03448
Reaction	Abdominal discomfort	3	1.31215	0.42567	4.04479	0.50136	1.03448
Reaction	Hyperhidrosis	3	1.29962	0.4216	4.00617	0.50502	1.03448
Reaction	Myocardial infarction	3	0.65416	0.21222	2.01647	0.63717	1.03448
Reaction	Tremor	3	1.01482	0.32921	3.12824	0.77229	1.03448
Reaction	Abdominal pain upper	3	0.95869	0.31101	2.95522	1	1.03448
Reaction	Autoantibody positive	2	370.953	92.3484	1490.08	1e-05	0.68966
Reaction	Splenic lesion	2	311.938	77.7721	1251.16	2e-05	0.68966
Reaction	Mediastinal disorder	2	261.434	65.2634	1047.26	3e-05	0.68966
Reaction	Axonal neuropathy	2	146.794	36.7514	586.333	9e-05	0.68966
Reaction	Encephalitis herpes	2	101.107	25.3424	403.38	0.00019	0.68966
Reaction	Quadriparesis	2	87.7014	21.9897	349.778	0.00026	0.68966
Reaction	Antibody test positive	2	54.1965	13.6004	215.968	0.00066	0.68966
Reaction	Lymphadenitis	2	53.3538	13.3893	212.605	0.00068	0.68966
Reaction	Blood pressure immeasurable	2	48.9751	12.2918	195.135	0.00081	0.68966
Reaction	Neck mass	2	48.2011	12.0977	192.048	0.00084	0.68966
Reaction	Acute lymphocytic leukaemia	2	45.561	11.4359	181.517	0.00093	0.68966
Reaction	Bile duct obstruction	2	38.7446	9.72663	154.333	0.00129	0.68966
Reaction	Lung consolidation	2	35.2835	8.85851	140.534	0.00155	0.68966
Reaction	Areflexia	2	34.9688	8.77959	139.28	0.00157	0.68966
Reaction	Diffuse large B-cell lymphoma	2	32.9143	8.26419	131.09	0.00177	0.68966
Reaction	B-cell lymphoma	2	32.2	8.085	128.243	0.00185	0.68966
Reaction	Hepatic lesion	2	29.4376	7.39189	117.232	0.0022	0.68966
Reaction	Blood creatine increased	2	23.8286	5.98431	94.8817	0.00333	0.68966
Reaction	Haematotoxicity	2	19.345	4.85885	77.02	0.00498	0.68966
Reaction	Rales	2	18.5039	4.64769	73.6697	0.00543	0.68966
Reaction	Metastasis	2	18.0121	4.52424	71.7111	0.00571	0.68966
Reaction	Arthropod bite	2	17.2482	4.33243	68.6683	0.00621	0.68966
Reaction	Meningitis	2	17.1352	4.30405	68.218	0.00629	0.68966
Reaction	VIIth nerve paralysis	2	14.935	3.75162	59.4554	0.00819	0.68966
Reaction	Pericarditis	2	14.4705	3.63498	57.6056	0.0087	0.68966
Reaction	Progressive multifocal leukoencephalopathy	2	13.8674	3.48354	55.2039	0.00943	0.68966
Reaction	Body temperature decreased	2	13.7424	3.45216	54.7063	0.0096	0.68966
Reaction	Hyperbilirubinaemia	2	12.469	3.13237	49.6354	0.01154	0.68966
Reaction	Bacteraemia	2	12.2849	3.08612	48.9021	0.01187	0.68966
Reaction	Respiratory rate increased	2	12.0476	3.02654	47.9575	0.01232	0.68966
Reaction	Neoplasm	2	11.4401	2.87397	45.5384	0.01358	0.68966
Reaction	Splenomegaly	2	10.2237	2.56845	40.695	0.01678	0.68966
Reaction	Basal cell carcinoma	2	9.19616	2.31038	36.6041	0.02044	0.68966
Reaction	Pulmonary congestion	2	8.6336	2.16908	34.3644	0.02298	0.68966
Reaction	Agranulocytosis	2	8.06301	2.02575	32.0928	0.02607	0.68966
Reaction	Sinus tachycardia	2	7.38513	1.85547	29.3942	0.03062	0.68966
Reaction	Acute respiratory distress syndrome	2	6.6928	1.68156	26.6381	0.03661	0.68966
Reaction	Neoplasm progression	2	6.66922	1.67564	26.5443	0.03684	0.68966
Reaction	Prostate cancer	2	6.60186	1.65871	26.2761	0.03752	0.68966
Reaction	Cardiomegaly	2	6.31482	1.58661	25.1335	0.04065	0.68966
Reaction	Respiratory tract infection	2	5.9792	1.5023	23.7975	0.04482	0.68966
Reaction	Body temperature increased	2	5.40684	1.35851	21.5191	0.05358	0.68966
Reaction	Pulmonary hypertension	2	5.16181	1.29695	20.5438	0.05813	0.68966
Reaction	Blood urea increased	2	4.72877	1.18816	18.8201	0.0677	0.68966
Reaction	Red blood cell count decreased	2	4.58349	1.15166	18.2419	0.07145	0.68966
Reaction	Metabolic acidosis	2	4.54028	1.1408	18.0699	0.07262	0.68966
Reaction	Post procedural complication	2	4.47733	1.12499	17.8193	0.07438	0.68966
Reaction	Renal failure chronic	2	4.45408	1.11915	17.7268	0.07505	0.68966
Reaction	Cerebral infarction	2	4.3253	1.08679	17.2142	0.07891	0.68966
Reaction	Night sweats	2	4.16485	1.04648	16.5755	0.08415	0.68966
Reaction	Lower respiratory tract infection	2	4.0761	1.02418	16.2223	0.08727	0.68966
Reaction	Respiratory disorder	2	3.97747	0.9994	15.8297	0.09095	0.68966
Reaction	Gastritis	2	3.92094	0.9852	15.6047	0.09316	0.68966
Reaction	Head injury	2	3.85379	0.96833	15.3374	0.09589	0.68966
Reaction	Mental status changes	2	3.52857	0.88662	14.043	0.11097	0.68966
Reaction	Jaundice	2	3.37977	0.84924	13.4508	0.11907	0.68966
Reaction	Hepatic failure	2	3.37728	0.84861	13.4408	0.11921	0.68966
Reaction	Haematuria	2	3.20834	0.80616	12.7684	0.12954	0.68966
Reaction	Rash erythematous	2	3.14691	0.79073	12.524	0.13362	0.68966
Reaction	No therapeutic response	2	2.81602	0.70759	11.207	0.15926	0.68966
Reaction	White blood cell count increased	2	2.55105	0.64101	10.1524	0.18538	0.68966
Reaction	Rash pruritic	2	2.4314	0.61095	9.67622	0.19927	0.68966
Reaction	Bradycardia	2	2.27447	0.57152	9.05163	0.21991	0.68966
Reaction	Hyponatraemia	2	2.14014	0.53777	8.51703	0.24014	0.68966
Reaction	Therapeutic response decreased	2	2.12515	0.534	8.45736	0.24257	0.68966
Reaction	Bone pain	2	2.09298	0.52592	8.32935	0.24789	0.68966
Reaction	Anxiety	2	0.42427	0.10661	1.68838	0.34453	0.68966
Reaction	Swelling	2	1.631	0.40984	6.49073	0.34702	0.68966
Reaction	Alanine aminotransferase increased	2	1.57517	0.39581	6.26856	0.36263	0.68966
Reaction	Dysgeusia	2	1.41929	0.35664	5.64819	0.41168	0.68966
Reaction	Cardiac arrest	2	1.22522	0.30788	4.87586	0.6806	0.68966
Reaction	Adverse event	2	1.22135	0.30691	4.86046	0.68124	0.68966
Reaction	Visual impairment	2	1.17215	0.29454	4.66463	0.68997	0.68966
Reaction	Gastrointestinal haemorrhage	2	1.09254	0.27454	4.34781	0.70637	0.68966
Reaction	Muscular weakness	2	1.02525	0.25763	4.08002	0.72262	0.68966
Reaction	Loss of consciousness	2	0.85684	0.21531	3.40981	1	0.68966
Reaction	Urinary tract infection	2	0.83042	0.20867	3.3047	1	0.68966
Reaction	Injection site erythema	2	0.81286	0.20426	3.23478	1	0.68966
Reaction	Hypersensitivity	2	0.77788	0.19547	3.09558	1	0.68966
Reaction	Confusional state	2	0.71516	0.17971	2.84601	1	0.68966
Reaction	Non-Hodgkin's lymphoma transformed recurrent	2	N/A	N/A	N/A	N/A	0.68966
Reaction	Mycobacteria urine test positive	1	4575.09	552.509	37884.3	0.00025	0.34483
Reaction	Malignant hepatobiliary neoplasm	1	3431.32	430.52	27348.2	0.00033	0.34483
Reaction	Synovial fluid crystal present	1	1830.03	242.52	13809.3	0.00058	0.34483
Reaction	Iodine uptake increased	1	1614.74	215.593	12094	0.00066	0.34483
Reaction	Non-Hodgkin's lymphoma stage II	1	1444.76	194.043	10757.1	0.00073	0.34483
Reaction	Radiation exposure	1	1247.75	168.739	9226.55	0.00084	0.34483
Reaction	Asthma late onset	1	885.501	121.282	6465.18	0.00117	0.34483
Reaction	Malignant mesenteric neoplasm	1	857.829	117.607	6257.05	0.0012	0.34483
Reaction	Sebaceous carcinoma	1	762.515	104.891	5543.17	0.00135	0.34483
Reaction	Dependence on enabling machine or device	1	722.382	99.5113	5243.99	0.00142	0.34483
Reaction	Polycystic liver disease	1	686.263	94.6564	4975.44	0.00149	0.34483
Reaction	Non-Hodgkin's lymphoma stage III	1	653.584	90.2531	4733.05	0.00157	0.34483
Reaction	Erythroleukaemia	1	450.009	62.591	3235.41	0.00226	0.34483
Reaction	Lymphoma transformation	1	450.009	62.591	3235.41	0.00226	0.34483
Reaction	Hodgkin's disease recurrent	1	442.75	61.5973	3182.41	0.00229	0.34483
Reaction	Retroperitoneal neoplasm	1	415.917	57.9193	2986.69	0.00244	0.34483
Reaction	Radiculitis brachial	1	403.684	56.2402	2897.59	0.00251	0.34483
Reaction	Sarcoma uterus	1	356.5	49.7499	2554.63	0.00284	0.34483
Reaction	Liver palpable subcostal	1	330.729	46.1959	2367.78	0.00306	0.34483
Reaction	Thyroxine abnormal	1	330.729	46.1959	2367.78	0.00306	0.34483
Reaction	Salivary gland mass	1	305.006	42.6418	2181.63	0.00331	0.34483
Reaction	Complement factor decreased	1	258.967	36.2647	1849.29	0.00389	0.34483
Reaction	Radiation mucositis	1	230.677	32.3355	1645.61	0.00436	0.34483
Reaction	Meningitis herpes	1	221.375	31.042	1578.73	0.00454	0.34483
Reaction	Hepatitis B antibody positive	1	212.795	29.8479	1517.08	0.00472	0.34483
Reaction	Cytogenetic analysis abnormal	1	193.314	27.1342	1377.23	0.0052	0.34483
Reaction	Gallop rhythm present	1	183.003	25.6965	1303.3	0.00549	0.34483
Reaction	Orthostatic hypertension	1	157.762	22.1721	1122.53	0.00635	0.34483
Reaction	Hydroureter	1	155.969	21.9215	1109.7	0.00643	0.34483
Reaction	Dilatation intrahepatic duct acquired	1	155.088	21.7984	1103.39	0.00646	0.34483
Reaction	Positron emission tomogram abnormal	1	146.794	20.6388	1044.08	0.00683	0.34483
Reaction	Erythropoiesis abnormal	1	144.476	20.3146	1027.51	0.00693	0.34483
Reaction	Tongue exfoliation	1	144.476	20.3146	1027.51	0.00693	0.34483
Reaction	Radiation oesophagitis	1	140.054	19.6958	995.899	0.00715	0.34483
Reaction	Lymphocytic leukaemia	1	138.639	19.4978	985.79	0.00722	0.34483
Reaction	Refractory anaemia	1	122.547	17.2446	870.867	0.00816	0.34483
Reaction	Treatment related secondary malignancy	1	122.002	17.1683	866.98	0.0082	0.34483
Reaction	Non-Hodgkin's lymphoma recurrent	1	116.811	16.4408	829.934	0.00856	0.34483
Reaction	Urine leukocyte esterase positive	1	114.377	16.0997	812.573	0.00874	0.34483
Reaction	Capillary disorder	1	112.502	15.8368	799.198	0.00889	0.34483
Reaction	Refractory anaemia with an excess of blasts	1	103.979	14.6415	738.428	0.00961	0.34483
Reaction	Urinary tract infection pseudomonal	1	86.0518	12.1249	610.722	0.01159	0.34483
Reaction	Platelet transfusion	1	79.1081	11.1492	561.303	0.0126	0.34483
Reaction	Scrotal oedema	1	75.6213	10.6591	536.495	0.01317	0.34483
Reaction	Groin abscess	1	73.9906	10.4299	524.896	0.01346	0.34483
Reaction	Pleural disorder	1	72.6204	10.2372	515.151	0.01371	0.34483
Reaction	Flight of ideas	1	67.1162	9.46318	476.011	0.01483	0.34483
Reaction	Haemophilus infection	1	67.1162	9.46318	476.011	0.01483	0.34483
Reaction	Pelvic mass	1	64.5895	9.10775	458.05	0.0154	0.34483
Reaction	Red blood cell abnormality	1	61.137	8.62198	433.512	0.01626	0.34483
Reaction	Acarodermatitis	1	59.8051	8.43454	424.048	0.01662	0.34483
Reaction	Chronic hepatitis	1	59.0334	8.32594	418.564	0.01683	0.34483
Reaction	Laryngeal cancer	1	53.302	7.51913	377.85	0.01862	0.34483
Reaction	Pneumonia streptococcal	1	51.5987	7.2793	365.753	0.01923	0.34483
Reaction	Hyperplasia	1	49.6393	7.00336	351.839	0.01998	0.34483
Reaction	Intestinal mass	1	46.6846	6.58719	330.862	0.02123	0.34483
Reaction	Neutropenic infection	1	45.4479	6.41298	322.083	0.0218	0.34483
Reaction	Streptococcal sepsis	1	45.3728	6.4024	321.55	0.02183	0.34483
Reaction	Procedural hypotension	1	44.3466	6.25782	314.266	0.02233	0.34483
Reaction	Bundle branch block	1	44.1327	6.22769	312.747	0.02244	0.34483
Reaction	Infusion site haematoma	1	43.4344	6.1293	307.791	0.0228	0.34483
Reaction	Hepatic mass	1	43.0259	6.07175	304.892	0.02301	0.34483
Reaction	Gastrointestinal ulcer haemorrhage	1	41.1552	5.80815	291.616	0.02404	0.34483
Reaction	Lip and/or oral cavity cancer	1	40.9099	5.77357	289.875	0.02418	0.34483
Reaction	Subclavian vein thrombosis	1	40.3684	5.69727	286.033	0.0245	0.34483
Reaction	Metastases to meninges	1	40.0738	5.65574	283.943	0.02468	0.34483
Reaction	Cancer pain	1	40.0153	5.64751	283.528	0.02472	0.34483
Reaction	Bone marrow toxicity	1	36.7477	5.18694	260.345	0.02688	0.34483
Reaction	White blood cells urine positive	1	34.4856	4.86804	244.299	0.02862	0.34483
Reaction	Peripheral embolism	1	34.0577	4.80771	241.264	0.02897	0.34483
Reaction	Oral mucosal exfoliation	1	33.6403	4.74887	238.304	0.02933	0.34483
Reaction	Biliary dilatation	1	33.3137	4.70282	235.987	0.02961	0.34483
Reaction	Urinary tract obstruction	1	32.6792	4.61334	231.487	0.03017	0.34483
Reaction	Spinal deformity	1	30.4667	4.30135	215.798	0.03233	0.34483
Reaction	Platelet disorder	1	29.3275	4.14068	207.72	0.03356	0.34483
Reaction	Periorbital haematoma	1	28.5645	4.03307	202.311	0.03444	0.34483
Reaction	Pelvic venous thrombosis	1	28.5052	4.0247	201.89	0.03451	0.34483
Reaction	Sensation of pressure	1	27.9252	3.9429	197.778	0.03521	0.34483
Reaction	Neutrophil count abnormal	1	27.3412	3.86051	193.638	0.03595	0.34483
Reaction	Urinary bladder haemorrhage	1	27.2597	3.84902	193.06	0.03606	0.34483
Reaction	Acute leukaemia	1	26.8334	3.78887	190.038	0.03662	0.34483
Reaction	White blood cell disorder	1	25.9702	3.66711	183.919	0.03781	0.34483
Reaction	Microcytic anaemia	1	25.8967	3.65674	183.398	0.03792	0.34483
Reaction	Intermittent claudication	1	25.6787	3.62598	181.853	0.03823	0.34483
Reaction	Lymphoproliferative disorder	1	25.3936	3.58577	179.832	0.03865	0.34483
Reaction	Gastric polyps	1	24.9777	3.52709	176.884	0.03928	0.34483
Reaction	Rash morbilliform	1	23.5223	3.32174	166.569	0.04166	0.34483
Reaction	Retroperitoneal haematoma	1	22.7616	3.21441	161.178	0.04302	0.34483
Reaction	Abdominal rigidity	1	22.593	3.19062	159.983	0.04333	0.34483
Reaction	Lung adenocarcinoma	1	22.2452	3.14153	157.518	0.044	0.34483
Reaction	Catheter related infection	1	22.1019	3.12131	156.502	0.04427	0.34483
Reaction	Urine output increased	1	19.777	2.79322	140.029	0.04934	0.34483
Reaction	Off label use	1	0.18338	0.02592	1.2975	0.04943	0.34483
Reaction	Neoplasm recurrence	1	18.6105	2.62858	131.764	0.05235	0.34483
Reaction	Haemothorax	1	18.4355	2.60388	130.524	0.05284	0.34483
Reaction	Stridor	1	17.9533	2.53581	127.107	0.05422	0.34483
Reaction	Nuclear magnetic resonance imaging brain abnormal	1	17.5179	2.47435	124.023	0.05552	0.34483
Reaction	Occult blood positive	1	17.0183	2.40383	120.484	0.05711	0.34483
Reaction	Computerised tomogram abnormal	1	16.4374	2.32183	116.369	0.05906	0.34483
Reaction	Hodgkin's disease	1	16.4374	2.32183	116.369	0.05906	0.34483
Reaction	Stem cell transplant	1	16.3591	2.31077	115.814	0.05934	0.34483
Reaction	Ventricular dysfunction	1	15.7852	2.22976	111.749	0.06143	0.34483
Reaction	Hepatic neoplasm	1	15.6771	2.21449	110.983	0.06184	0.34483
Reaction	Pleuritic pain	1	15.5088	2.19073	109.791	0.06248	0.34483
Reaction	Staphylococcal bacteraemia	1	15.3013	2.16144	108.321	0.0633	0.34483
Reaction	Arthritis bacterial	1	15.0662	2.12824	106.656	0.06426	0.34483
Reaction	Jaundice cholestatic	1	14.6091	2.06371	103.419	0.0662	0.34483
Reaction	Bronchiectasis	1	14.4781	2.04522	102.491	0.06678	0.34483
Reaction	Breath sounds abnormal	1	13.829	1.95356	97.8933	0.0698	0.34483
Reaction	Hypoventilation	1	13.7666	1.94475	97.4513	0.07011	0.34483
Reaction	Hyperuricaemia	1	13.332	1.88338	94.3734	0.07231	0.34483
Reaction	Pancreatic disorder	1	12.9362	1.82749	91.5703	0.07443	0.34483
Reaction	Non-cardiac chest pain	1	12.7381	1.79952	90.1674	0.07554	0.34483
Reaction	Protein urine present	1	12.3041	1.73825	87.0944	0.0781	0.34483
Reaction	Subcutaneous abscess	1	12.1463	1.71595	85.9764	0.07907	0.34483
Reaction	Extravasation	1	12.1194	1.71217	85.7865	0.07924	0.34483
Reaction	Haemoglobin abnormal	1	11.9246	1.68466	84.4071	0.08048	0.34483
Reaction	Anaphylactoid reaction	1	11.6365	1.64397	82.3667	0.08239	0.34483
Reaction	Hepatic neoplasm malignant	1	11.241	1.58812	79.5661	0.08516	0.34483
Reaction	Ocular icterus	1	11.1271	1.57203	78.7594	0.086	0.34483
Reaction	Lymphoedema	1	10.85	1.5329	76.7975	0.08809	0.34483
Reaction	Hepatic necrosis	1	10.5823	1.49509	74.902	0.09022	0.34483
Reaction	Congestive cardiomyopathy	1	10.5014	1.48366	74.3287	0.09088	0.34483
Reaction	Herpes virus infection	1	10.3081	1.45637	72.9605	0.0925	0.34483
Reaction	Encephalitis	1	9.98201	1.41031	70.6515	0.09537	0.34483
Reaction	Aortic valve incompetence	1	9.96028	1.40724	70.4976	0.09557	0.34483
Reaction	Blood pressure diastolic decreased	1	9.69983	1.37046	68.6536	0.09801	0.34483
Reaction	Injection site pain	1	0.21993	0.03108	1.55611	0.09862	0.34483
Reaction	Tumour lysis syndrome	1	9.62501	1.35989	68.1238	0.09873	0.34483
Reaction	Insomnia	1	0.21446	0.03031	1.51736	0.09903	0.34483
Reaction	Staphylococcal sepsis	1	9.52812	1.3462	67.4378	0.09968	0.34483
Reaction	Adrenal insufficiency	1	9.18078	1.29715	64.9786	0.10325	0.34483
Reaction	Obstructive airways disorder	1	9.02384	1.27498	63.8675	0.10495	0.34483
Reaction	Necrosis	1	8.63496	1.22005	61.1142	0.10941	0.34483
Reaction	Hair texture abnormal	1	8.47762	1.19783	60.0003	0.11132	0.34483
Reaction	Herpes simplex	1	8.02647	1.1341	56.8064	0.11719	0.34483
Reaction	Parosmia	1	8.01241	1.13212	56.7069	0.11739	0.34483
Reaction	Pleurisy	1	7.98909	1.12882	56.5418	0.11771	0.34483
Reaction	Hydronephrosis	1	7.9268	1.12002	56.1009	0.11858	0.34483
Reaction	Lung neoplasm	1	7.90853	1.11744	55.9715	0.11883	0.34483
Reaction	Eye discharge	1	7.82512	1.10566	55.381	0.12002	0.34483
Reaction	Renal cell carcinoma	1	7.80954	1.10346	55.2707	0.12024	0.34483
Reaction	Hiccups	1	7.49809	1.05946	53.0659	0.12491	0.34483
Reaction	Jaw disorder	1	7.43917	1.05114	52.6487	0.12584	0.34483
Reaction	Decreased activity	1	7.31819	1.03405	51.7923	0.12778	0.34483
Reaction	Excoriation	1	7.25628	1.02531	51.3541	0.1288	0.34483
Reaction	Blood disorder	1	7.17473	1.01379	50.7768	0.13016	0.34483
Reaction	Facial palsy	1	7.09683	1.00278	50.2253	0.13149	0.34483
Reaction	Angiopathy	1	6.99733	0.98872	49.521	0.13323	0.34483
Reaction	Acidosis	1	6.89365	0.97408	48.7871	0.13509	0.34483
Reaction	Renal cyst	1	6.84893	0.96776	48.4705	0.13591	0.34483
Reaction	Gastrointestinal pain	1	6.81831	0.96344	48.2537	0.13648	0.34483
Reaction	Atrial flutter	1	6.74129	0.95255	47.7085	0.13792	0.34483
Reaction	Squamous cell carcinoma	1	6.71819	0.94929	47.545	0.13836	0.34483
Reaction	Feeling abnormal	1	0.2419	0.03419	1.71154	0.13892	0.34483
Reaction	Blood test abnormal	1	6.62416	0.93601	46.8794	0.14018	0.34483
Reaction	Decubitus ulcer	1	6.5734	0.92884	46.5201	0.14119	0.34483
Reaction	Depression	1	0.22882	0.03234	1.61902	0.14127	0.34483
Reaction	Groin pain	1	6.553	0.92596	46.3757	0.14159	0.34483
Reaction	Hyperaesthesia	1	6.29455	0.88944	44.5462	0.14696	0.34483
Reaction	Electrocardiogram abnormal	1	6.11098	0.86351	43.2468	0.15102	0.34483
Reaction	Neurotoxicity	1	6.10147	0.86217	43.1795	0.15124	0.34483
Reaction	Increased tendency to bruise	1	6.06239	0.85665	42.9029	0.15213	0.34483
Reaction	Subarachnoid haemorrhage	1	5.99618	0.84729	42.4342	0.15368	0.34483
Reaction	Laryngitis	1	5.91224	0.83543	41.84	0.15568	0.34483
Reaction	Electrolyte imbalance	1	5.90334	0.83418	41.777	0.1559	0.34483
Reaction	Arterial occlusive disease	1	5.89573	0.8331	41.7232	0.15608	0.34483
Reaction	Purpura	1	5.76934	0.81525	40.8286	0.15921	0.34483
Reaction	Lymphopenia	1	5.64013	0.79699	39.914	0.16255	0.34483
Reaction	Coronary artery bypass	1	5.58505	0.78921	39.5241	0.16401	0.34483
Reaction	Prothrombin time prolonged	1	5.55454	0.7849	39.3081	0.16483	0.34483
Reaction	Micturition urgency	1	5.5478	0.78395	39.2605	0.16501	0.34483
Reaction	Pain of skin	1	5.4111	0.76463	38.2929	0.16881	0.34483
Reaction	Incontinence	1	5.34369	0.75511	37.8157	0.17075	0.34483
Reaction	Intestinal perforation	1	5.22768	0.73872	36.9946	0.17419	0.34483
Reaction	Malnutrition	1	5.1911	0.73355	36.7357	0.1753	0.34483
Reaction	Hypercalcaemia	1	5.15987	0.72914	36.5147	0.17626	0.34483
Reaction	Hyperthyroidism	1	5.1319	0.72519	36.3167	0.17713	0.34483
Reaction	Skin cancer	1	5.09759	0.72034	36.0738	0.17821	0.34483
Reaction	Blood calcium decreased	1	5.05814	0.71477	35.7946	0.17947	0.34483
Reaction	Small intestinal obstruction	1	5.04605	0.71306	35.7091	0.17986	0.34483
Reaction	Emphysema	1	5.01563	0.70876	35.4937	0.18084	0.34483
Reaction	Muscle atrophy	1	4.96572	0.70171	35.1405	0.18248	0.34483
Reaction	Oesophagitis	1	4.75498	0.67193	33.6489	0.18975	0.34483
Reaction	Ataxia	1	4.58273	0.6476	32.4297	0.19614	0.34483
Reaction	Product quality issue	1	0.25154	0.03555	1.77976	0.19855	0.34483
Reaction	Bedridden	1	4.46132	0.63044	31.5705	0.2009	0.34483
Reaction	Post procedural haemorrhage	1	4.38647	0.61987	31.0407	0.20395	0.34483
Reaction	Full blood count decreased	1	4.35308	0.61515	30.8044	0.20534	0.34483
Reaction	Thyroid disorder	1	4.24471	0.59984	30.0374	0.20999	0.34483
Reaction	Drug level increased	1	3.98064	0.56253	28.1685	0.22225	0.34483
Reaction	Subdural haematoma	1	3.89811	0.55087	27.5844	0.22638	0.34483
Reaction	Mitral valve incompetence	1	3.88378	0.54884	27.4829	0.22712	0.34483
Reaction	Accidental exposure	1	3.88268	0.54868	27.4751	0.22717	0.34483
Reaction	Obesity	1	3.77379	0.5333	26.7045	0.2329	0.34483
Reaction	Musculoskeletal chest pain	1	3.71858	0.5255	26.3137	0.23592	0.34483
Reaction	Orthostatic hypotension	1	3.65276	0.5162	25.848	0.23961	0.34483
Reaction	Photophobia	1	3.62479	0.51225	25.65	0.24122	0.34483
Reaction	Injection site irritation	1	3.49021	0.49323	24.6976	0.24925	0.34483
Reaction	Cardiomyopathy	1	3.37894	0.47751	23.9101	0.25631	0.34483
Reaction	Blood potassium increased	1	3.32814	0.47033	23.5506	0.25967	0.34483
Reaction	Toothache	1	3.31088	0.46789	23.4284	0.26083	0.34483
Reaction	Dialysis	1	3.29064	0.46503	23.2852	0.2622	0.34483
Reaction	Scar	1	3.26171	0.46094	23.0804	0.26419	0.34483
Reaction	Hallucination, visual	1	3.21021	0.45367	22.716	0.2678	0.34483
Reaction	Mouth ulceration	1	3.18858	0.45061	22.5629	0.26935	0.34483
Reaction	Weight increased	1	0.2932	0.04144	2.07451	0.27364	0.34483
Reaction	Rash maculo-papular	1	3.12933	0.44224	22.1436	0.27368	0.34483
Reaction	Pneumonitis	1	3.11796	0.44063	22.0631	0.27453	0.34483
Reaction	Face oedema	1	3.08849	0.43647	21.8546	0.27675	0.34483
Reaction	Psychomotor hyperactivity	1	2.98635	0.42203	21.1317	0.28472	0.34483
Reaction	Clostridial infection	1	2.94787	0.41659	20.8594	0.28784	0.34483
Reaction	Blood sodium decreased	1	2.86959	0.40553	20.3055	0.29441	0.34483
Reaction	Amenorrhoea	1	2.84697	0.40234	20.1454	0.29636	0.34483
Reaction	Drug administered at inappropriate site	1	2.72003	0.3844	19.247	0.30782	0.34483
Reaction	Laboratory test abnormal	1	2.6721	0.37763	18.9079	0.31237	0.34483
Reaction	Encephalopathy	1	2.61185	0.36911	18.4815	0.31829	0.34483
Reaction	Anaphylactic shock	1	2.60367	0.36796	18.4236	0.31911	0.34483
Reaction	Fluid overload	1	2.58018	0.36464	18.2574	0.32149	0.34483
Reaction	Faeces discoloured	1	2.5614	0.36198	18.1245	0.32342	0.34483
Reaction	Mucosal inflammation	1	2.5307	0.35765	17.9072	0.32662	0.34483
Reaction	Ageusia	1	2.48579	0.3513	17.5894	0.33142	0.34483
Reaction	Shock	1	2.45576	0.34706	17.3769	0.3347	0.34483
Reaction	Colitis ulcerative	1	2.45182	0.3465	17.349	0.33514	0.34483
Reaction	Bone disorder	1	2.41642	0.3415	17.0985	0.3391	0.34483
Reaction	Hepatitis	1	2.33027	0.32932	16.4888	0.34915	0.34483
Reaction	Pharyngeal oedema	1	2.27597	0.32165	16.1046	0.35579	0.34483
Reaction	Bladder cancer	1	2.27296	0.32122	16.0833	0.35617	0.34483
Reaction	Hypersomnia	1	2.21482	0.31301	15.6719	0.36357	0.34483
Reaction	Feeling cold	1	2.1194	0.29952	14.9967	0.3764	0.34483
Reaction	Constipation	1	0.34005	0.04806	2.406	0.38062	0.34483
Reaction	Convulsion	1	0.32128	0.04541	2.2732	0.38452	0.34483
Reaction	Muscle spasms	1	0.32081	0.04534	2.26991	0.38469	0.34483
Reaction	Condition aggravated	1	0.30531	0.04315	2.16018	0.3922	0.34483
Reaction	Respiratory distress	1	1.99539	0.282	14.1191	0.39445	0.34483
Reaction	Fungal infection	1	1.97245	0.27876	13.9567	0.39797	0.34483
Reaction	Electrocardiogram QT prolonged	1	1.97004	0.27842	13.9397	0.39835	0.34483
Reaction	Viral infection	1	1.963	0.27742	13.8899	0.39944	0.34483
Reaction	Ascites	1	1.96019	0.27703	13.87	0.39988	0.34483
Reaction	Blood potassium decreased	1	1.90629	0.26941	13.4886	0.40849	0.34483
Reaction	Gastric disorder	1	1.66822	0.23576	11.8039	0.45124	0.34483
Reaction	Movement disorder	1	1.65504	0.2339	11.7107	0.45385	0.34483
Reaction	Inflammation	1	1.60821	0.22728	11.3793	0.4634	0.34483
Reaction	Septic shock	1	1.58912	0.22459	11.2442	0.4674	0.34483
Reaction	Discomfort	1	1.5644	0.22109	11.0693	0.47268	0.34483
Reaction	Eye irritation	1	1.54277	0.21804	10.9162	0.4774	0.34483
Reaction	Oxygen saturation decreased	1	1.52097	0.21496	10.762	0.48224	0.34483
Reaction	Throat irritation	1	1.49391	0.21113	10.5705	0.48839	0.34483
Reaction	Pollakiuria	1	1.45672	0.20588	10.3074	0.49707	0.34483
Reaction	Cholelithiasis	1	1.4345	0.20274	10.1501	0.50241	0.34483
Reaction	Wheezing	1	1.43352	0.2026	10.1432	0.50264	0.34483
Reaction	Depressed level of consciousness	1	1.4315	0.20231	10.1289	0.50313	0.34483
Reaction	Cognitive disorder	1	1.41578	0.20009	10.0176	0.50698	0.34483
Reaction	Eye pain	1	1.40168	0.1981	9.91789	0.51048	0.34483
Reaction	Hypokalaemia	1	1.38311	0.19547	9.78646	0.51516	0.34483
Reaction	Transient ischaemic attack	1	1.35565	0.19159	9.59216	0.52223	0.34483
Reaction	Renal failure acute	1	0.40206	0.05683	2.84479	0.52782	0.34483
Reaction	Incorrect dose administered	1	0.39247	0.05547	2.7769	0.52852	0.34483
Reaction	Overdose	1	0.38248	0.05406	2.70621	0.52996	0.34483
Reaction	Surgery	1	1.31336	0.18562	9.29292	0.53347	0.34483
Reaction	Liver function test abnormal	1	1.30991	0.18513	9.26853	0.5344	0.34483
Reaction	Nasal congestion	1	1.2855	0.18168	9.09577	0.54112	0.34483
Reaction	International normalised ratio increased	1	1.28393	0.18146	9.08471	0.54156	0.34483
Reaction	Rectal haemorrhage	1	1.26518	0.17881	8.95197	0.54684	0.34483
Reaction	Pulmonary oedema	1	1.25666	0.1776	8.89173	0.54926	0.34483
Reaction	Blister	1	1.25191	0.17693	8.85807	0.55063	0.34483
Reaction	Disorientation	1	1.24211	0.17555	8.78873	0.55346	0.34483
Reaction	Stomatitis	1	1.22492	0.17312	8.66714	0.55849	0.34483
Reaction	Dry skin	1	1.20434	0.17021	8.5215	0.56462	0.34483
Reaction	Drug intolerance	1	1.19065	0.16827	8.42466	0.56877	0.34483
Reaction	Underdose	1	1.16578	0.16476	8.24862	0.57645	0.34483
Reaction	Dysphonia	1	1.13676	0.16066	8.04332	0.58565	0.34483
Reaction	Neck pain	1	1.11248	0.15723	7.87153	0.59355	0.34483
Reaction	Neoplasm malignant	1	1.09947	0.15539	7.77946	0.59787	0.34483
Reaction	Hypoglycaemia	1	1.09404	0.15462	7.74102	0.59969	0.34483
Reaction	Speech disorder	1	1.07354	0.15172	7.596	0.60663	0.34483
Reaction	Disturbance in attention	1	1.04689	0.14796	7.4074	0.61588	0.34483
Reaction	Pulmonary embolism	1	0.50039	0.07072	3.54052	0.72839	0.34483
Reaction	Memory impairment	1	0.48491	0.06853	3.43094	0.72865	0.34483
Reaction	Injury	1	0.47948	0.06777	3.39253	0.72887	0.34483
Reaction	Drug effect decreased	1	0.42511	0.06008	3.00784	0.73589	0.34483
Reaction	Blood pressure increased	1	0.42498	0.06006	3.00695	0.73592	0.34483
Reaction	Drug administration error	1	0.98654	0.13943	6.98038	1	0.34483
Reaction	Pancreatitis	1	0.93768	0.13252	6.63463	1	0.34483
Reaction	Swelling face	1	0.92651	0.13094	6.55558	1	0.34483
Reaction	Hallucination	1	0.90141	0.1274	6.37797	1	0.34483
Reaction	Irritability	1	0.83599	0.11815	5.91509	1	0.34483
Reaction	Epistaxis	1	0.82434	0.11651	5.83267	1	0.34483
Reaction	Burning sensation	1	0.82335	0.11637	5.82567	1	0.34483
Reaction	Amnesia	1	0.80884	0.11432	5.72302	1	0.34483
Reaction	Dry mouth	1	0.75059	0.10608	5.31082	1	0.34483
Reaction	Wrong technique in drug usage process	1	0.73399	0.10374	5.19338	1	0.34483
Reaction	Drug exposure during pregnancy	1	0.73098	0.10331	5.17208	1	0.34483
Reaction	Thrombosis	1	0.7174	0.10139	5.07598	1	0.34483
Reaction	Tachycardia	1	0.69996	0.09893	4.95262	1	0.34483
Reaction	Balance disorder	1	0.68253	0.09646	4.82923	1	0.34483
Reaction	Agitation	1	0.66921	0.09458	4.73505	1	0.34483
Reaction	Joint swelling	1	0.66323	0.09374	4.69272	1	0.34483
Reaction	General physical health deterioration	1	0.65928	0.09318	4.66476	1	0.34483
Reaction	Contusion	1	0.65811	0.09301	4.65649	1	0.34483
Reaction	Abdominal distension	1	0.61323	0.08667	4.3389	1	0.34483
Reaction	No adverse event	1	0.53914	0.0762	3.81471	1	0.34483
Reaction	Palpitations	1	0.51569	0.07288	3.64873	1	0.34483
Outcome	Other	106	1.07215	0.9213	1.24771	0.38603	36.5517
Outcome	Hospitalization - Initial or Prolonged	90	1.27392	1.07307	1.51237	0.00931	31.0345
Outcome	Death	64	2.18246	1.75797	2.70945	0	22.069
Outcome	Life-Threatening	23	2.62073	1.77054	3.87916	3e-05	7.93103
Outcome	Disability	14	2.00691	1.20388	3.3456	0.01847	4.82759
Outcome	Required Intervention to Prevent Permanent Impairment/Damage	4	1.5771	0.59591	4.17382	0.32805	1.37931

## Sheet: Bexxar.Data.VigiBase.Stats
CONCEPT	NAME	CONCEPT_AES_IN_COHORT	PRR	PRR_95CI(-)	PRR_95CI(+)	P-value Fisher Exact Test (two tailed)	COHORT_%COVERAGE
Indication	Non-hodgkin's lymphoma	167	1175.63	1058.7	1305.48	0	54.3974
Indication	Diffuse large b-cell lymphoma	39	395.57	294.682	530.998	0	12.7036
Indication	B-cell lymphoma	23	274.895	185.353	407.694	0	7.49186
Indication	Drug use for unknown indication	22	3.55793	2.37868	5.32182	0	7.16612
Indication	Lymphoma	17	143.168	90.1408	227.391	0	5.53746
Indication	Mantle cell lymphoma	9	99.9914	52.4995	190.445	0	2.9316
Indication	Product used for unknown indication	9	0.40932	0.21504	0.77914	0.00255	2.9316
Indication	Multiple myeloma	7	7.27666	3.4984	15.1354	6e-05	2.28013
Indication	Prophylaxis	3	1.26688	0.41085	3.90647	0.5151	0.9772
Indication	B-cell small lymphocytic lymphoma	2	336.46	84.1732	1344.91	2e-05	0.65147
Indication	Chronic lymphocytic leukaemia	2	7.35638	1.84793	29.2847	0.03083	0.65147
Indication	Premedication	2	4.45491	1.11912	17.7337	0.07503	0.65147
Indication	Cyanosis	1	2320.17	314.854	17097.4	0.00045	0.32573
Indication	Follicle centre lymphoma, follicular grade i, ii, iii stage iv	1	2227.36	302.745	16387.2	0.00047	0.32573
Indication	Platelet count abnormal	1	1237.42	171.107	8948.9	0.00083	0.32573
Indication	B-cell lymphoma recurrent	1	647.489	90.4608	4634.52	0.00156	0.32573
Indication	Other malignant neoplasm of lymphoid and histiocytic tissue	1	551.328	77.156	3939.58	0.00183	0.32573
Indication	Non-hodgkin's lymphoma stage iv	1	480.035	67.263	3425.86	0.0021	0.32573
Indication	Drug ineffective	1	464.034	65.0392	3310.74	0.00217	0.32573
Indication	Cardiac fibrillation	1	233.967	32.9257	1662.54	0.00428	0.32573
Indication	Respiratory distress	1	212.535	29.9209	1509.68	0.00471	0.32573
Indication	Skin lesion	1	121.316	17.1065	860.352	0.00823	0.32573
Indication	Ventricular tachycardia	1	37.4977	5.29527	265.535	0.02633	0.32573
Indication	Atrial flutter	1	21.5913	3.04989	152.853	0.04528	0.32573
Indication	Bone marrow conditioning regimen	1	19.9799	2.82235	141.441	0.04884	0.32573
Indication	Accidental exposure to product	1	18.2691	2.58075	129.326	0.05329	0.32573
Indication	Anaesthesia	1	10.9292	1.54409	77.3571	0.08747	0.32573
Indication	Hyperthyroidism	1	10.7167	1.51409	75.8532	0.08912	0.32573
Indication	Immunosuppressant drug therapy	1	10.2928	1.4542	72.8521	0.09261	0.32573
Indication	Pruritus	1	7.12802	1.00713	50.4491	0.13094	0.32573
Indication	Chemotherapy	1	6.14208	0.86784	43.4703	0.1503	0.32573
Indication	Infection prophylaxis	1	6.04277	0.85381	42.7673	0.15257	0.32573
Indication	Depression	1	0.28343	0.04005	2.00575	0.27642	0.32573
Indication	Thyroid disorder	1	2.89885	0.40961	20.5153	0.2919	0.32573
Indication	Deep vein thrombosis	1	2.69135	0.38029	19.0467	0.31051	0.32573
Indication	Cough	1	2.06077	0.2912	14.5839	0.3847	0.32573
Indication	Anxiety	1	0.66625	0.09415	4.71486	1	0.32573
Indication	Blood stem cell transplant failure	1	N/A	N/A	N/A	N/A	0.32573
Outcome	Death	74	6.09534	4.99789	7.43377	0	24.1042
Outcome	Other	71	1.84372	1.50356	2.26083	0	23.127
Outcome	Caused/Prolonged Hospitalization	63	1.73125	1.38915	2.15759	1e-05	20.5212
Outcome	Life threatening	16	3.15108	1.95555	5.0775	7e-05	5.21173
Outcome	Disabling/Incapacitating	5	1.97191	0.82664	4.7039	0.1128	1.62866
Product (drug)	Bexxar	170	N/A	N/A	N/A	N/A	55.3746
Product (drug)	Tositumomab	73	N/A	N/A	N/A	N/A	23.7785
Product (drug)	Tositumomab-iodine 131	71	N/A	N/A	N/A	N/A	23.127
Product (drug)	Cyclophosphamide	63	46.4673	37.2812	57.917	0	20.5212
Product (drug)	Prednisone	55	14.9396	11.7579	18.9821	0	17.9153
Product (drug)	Iodine (131 i)	52	16546.1	12397.7	22082.7	0	16.9381
Product (drug)	Rituximab	48	103.426	79.7362	134.154	0	15.6352
Product (drug)	Vincristine	44	110.043	83.6855	144.701	0	14.3323
Product (drug)	Doxorubicin	31	84.1724	60.2683	117.557	0	10.0977
Product (drug)	Drug name/s not accepted in who-dd	23	4.82624	3.25753	7.15039	0	7.49186
Product (drug)	Etoposide	19	40.8904	26.4487	63.2176	0	6.18893
Product (drug)	Doxorubicin hcl	16	171.6	106.413	276.718	0	5.21173
Product (drug)	Rituxan	15	37.3335	22.7864	61.1675	0	4.88599
Product (drug)	Sski	13	7540.55	4271.46	13311.6	0	4.23453
Product (drug)	Cytarabine	9	23.7189	12.459	45.1549	0	2.9316
Product (drug)	Potassium iodide	8	773.39	388.405	1539.97	0	2.60586
Product (drug)	Multivitamin	8	6.32648	3.19258	12.5367	5e-05	2.60586
Product (drug)	Drug name/s under assessment for who-dd	8	0.66556	0.33588	1.31884	0.3012	2.60586
Product (drug)	Cytoxan lyophilized	7	16241.2	7050.32	37413.4	0	2.28013
Product (drug)	Fludarabine phosphate	7	106.997	51.4064	222.702	0	2.28013
Product (drug)	Velcade	7	12.6084	6.06153	26.2263	0	2.28013
Product (drug)	Aspirin	7	1.26053	0.60605	2.6218	0.51486	2.28013
Product (drug)	Iodine	6	175.107	79.1876	387.214	0	1.9544
Product (drug)	Vincristine sulfate	6	27.9585	12.657	61.7587	0	1.9544
Product (drug)	Vicodin	6	10.5183	4.76232	23.2314	3e-05	1.9544
Product (drug)	Acyclovir	6	9.88241	4.47442	21.8268	4e-05	1.9544
Product (drug)	Benadryl	6	7.16394	3.24365	15.8223	0.00023	1.9544
Product (drug)	Prilosec	6	4.69829	2.1273	10.3765	0.00198	1.9544
Product (drug)	Lorazepam	6	4.64596	2.10361	10.2609	0.0021	1.9544
Product (drug)	Folic acid	6	2.59295	1.17406	5.72662	0.03018	1.9544
Product (drug)	Valtrex	5	15.7647	6.60798	37.61	2e-05	1.62866
Product (drug)	Oxycontin	5	5.31479	2.22794	12.6785	0.00277	1.62866
Product (drug)	Digoxin	5	3.31721	1.39059	7.91313	0.01863	1.62866
Product (drug)	Synthroid	5	2.15509	0.90343	5.14086	0.08536	1.62866
Product (drug)	Lasix	5	1.82746	0.76609	4.3593	0.20568	1.62866
Product (drug)	Cefepime	4	44.7531	16.8976	118.528	0	1.30293
Product (drug)	Adriamycin pfs	4	38.7166	14.6191	102.535	0	1.30293
Product (drug)	Levothyroxine sodium	4	5.21497	1.96972	13.807	0.00778	1.30293
Product (drug)	Toprol	4	5.13975	1.94131	13.6078	0.00817	1.30293
Product (drug)	Albuterol	4	3.44388	1.30079	9.11776	0.03024	1.30293
Product (drug)	Allopurinol	4	2.64184	0.99786	6.99429	0.06696	1.30293
Product (drug)	Plavix	4	2.17895	0.82302	5.76875	0.11395	1.30293
Product (drug)	Omeprazole	4	1.44833	0.54706	3.83443	0.36173	1.30293
Product (drug)	Iodine solution	3	4772.92	1475.76	15436.7	0	0.9772
Product (drug)	L-carnitine	3	275.664	89.1488	852.401	0	0.9772
Product (drug)	Alpha lipoic acid	3	98.5559	31.9303	304.203	0	0.9772
Product (drug)	Mitoxantrone	3	76.7351	24.8663	236.798	1e-05	0.9772
Product (drug)	Diphenhydramine Hcl	3	27.8374	9.02531	85.8609	0.00019	0.9772
Product (drug)	Amiodarone hcl	3	25.3071	8.20516	78.0546	0.00025	0.9772
Product (drug)	Calcium gluconate	3	21.8141	7.07289	67.2786	0.00039	0.9772
Product (drug)	Ifosfamide	3	20.457	6.63299	63.0924	0.00047	0.9772
Product (drug)	Cytoxan	3	17.7	5.73919	54.5876	0.00071	0.9772
Product (drug)	Pravachol	3	9.10069	2.95115	28.0646	0.00464	0.9772
Product (drug)	Metoprolol succinate	3	7.75544	2.51495	23.9158	0.00719	0.9772
Product (drug)	Colace	3	7.64786	2.48006	23.584	0.00747	0.9772
Product (drug)	Fluconazole	3	6.28536	2.03826	19.3821	0.01264	0.9772
Product (drug)	Warfarin sodium	3	3.97914	1.29041	12.2702	0.04083	0.9772
Product (drug)	Carboplatin	3	3.51652	1.14039	10.8436	0.05512	0.9772
Product (drug)	Acetaminophen	3	2.62917	0.85264	8.10726	0.10766	0.9772
Product (drug)	Zocor	3	2.58155	0.83719	7.96042	0.11207	0.9772
Product (drug)	Premarin	3	2.33931	0.75864	7.21342	0.13852	0.9772
Product (drug)	Tylenol	3	1.91517	0.62109	5.90552	0.20773	0.9772
Product (drug)	Coumadin	3	1.6568	0.5373	5.10884	0.2721	0.9772
Product (drug)	Tositumomab i-131	3	N/A	N/A	N/A	N/A	0.9772
Product (drug)	Vindesine	2	404.975	101.228	1620.16	1e-05	0.65147
Product (drug)	Vp-16	2	73.4134	18.4264	292.49	0.00036	0.65147
Product (drug)	Glucosamine Chondroitin	2	69.7796	17.5151	278	0.0004	0.65147
Product (drug)	Apap	2	55.0238	13.8139	219.173	0.00064	0.65147
Product (drug)	Sotalol hydrochloride	2	44.5651	11.1896	177.49	0.00098	0.65147
Product (drug)	Calcium citrate	2	33.8402	8.49791	134.758	0.00168	0.65147
Product (drug)	Fludara	2	27.6622	6.94704	110.148	0.00249	0.65147
Product (drug)	Fludarabine	2	21.6207	5.43019	86.0844	0.00401	0.65147
Product (drug)	Therapeutic radiopharmaceuticals	2	19.827	4.9798	78.9409	0.00475	0.65147
Product (drug)	Filgrastim	2	18.469	4.6388	73.5329	0.00544	0.65147
Product (drug)	Clotrimazole	2	18.4384	4.63113	73.4111	0.00546	0.65147
Product (drug)	Epirubicin	2	11.8313	2.97188	47.1015	0.01275	0.65147
Product (drug)	Mucinex	2	11.0298	2.77058	43.9103	0.01455	0.65147
Product (drug)	Alcohol	2	10.3377	2.59675	41.1546	0.01643	0.65147
Product (drug)	Neupogen	2	9.09202	2.28388	36.1949	0.02088	0.65147
Product (drug)	Levoxyl	2	7.36806	1.85087	29.3313	0.03074	0.65147
Product (drug)	Mabthera	2	5.35604	1.34548	21.3211	0.05448	0.65147
Product (drug)	Aranesp	2	4.57364	1.14895	18.2064	0.07171	0.65147
Product (drug)	Inderal	2	4.50975	1.1329	17.9521	0.07347	0.65147
Product (drug)	Decadron	2	4.10786	1.03194	16.3522	0.08613	0.65147
Product (drug)	Lanoxin	2	3.84346	0.96553	15.2996	0.09632	0.65147
Product (drug)	Potassium	2	3.31483	0.83273	13.1952	0.12288	0.65147
Product (drug)	Iron	2	3.2666	0.82062	13.0032	0.12583	0.65147
Product (drug)	Morphine sulfate	2	3.20337	0.80473	12.7515	0.12986	0.65147
Product (drug)	Spironolactone	2	2.51146	0.63092	9.99718	0.18981	0.65147
Product (drug)	Lexapro	2	2.43811	0.6125	9.70521	0.19844	0.65147
Product (drug)	Ambien	2	2.40147	0.60329	9.55934	0.20298	0.65147
Product (drug)	Zyrtec	2	2.37682	0.5971	9.4612	0.20611	0.65147
Product (drug)	Ativan	2	2.25205	0.56575	8.96452	0.22311	0.65147
Product (drug)	Bactrim	2	2.24964	0.56515	8.95492	0.22346	0.65147
Product (drug)	Lamictal	2	2.07649	0.52165	8.26567	0.25068	0.65147
Product (drug)	Wellbutrin	2	1.79455	0.45083	7.14338	0.30635	0.65147
Product (drug)	Levothyroxine	2	1.48848	0.37394	5.92501	0.38883	0.65147
Product (drug)	Zoloft	2	1.25382	0.31499	4.99091	0.67604	0.65147
Product (drug)	Celebrex	2	1.15437	0.29	4.59505	0.6934	0.65147
Product (drug)	Avandia	2	1.11597	0.28036	4.44218	0.70125	0.65147
Product (drug)	Lisinopril	2	0.64895	0.16303	2.58315	0.7751	0.65147
Product (drug)	Paracetamol	2	0.71251	0.179	2.83615	1	0.65147
Product (drug)	Cyclophosphamid farmos	1	18561.4	1936.02	177955	7e-05	0.32573
Product (drug)	Indium (111 in) ibritumomab tiuxetan	1	11136.8	1304.87	95050.9	0.00011	0.32573
Product (drug)	Cyclophosphamide;Doxorubicin;Prednisolone;Vincristine	1	5568.41	714.973	43368.3	0.0002	0.32573
Product (drug)	Iodine (131i) compounds	1	5568.41	714.973	43368.3	0.0002	0.32573
Product (drug)	Yttrium 90 Ibritumomab Tiuxetan	1	2421.05	327.972	17871.9	0.00043	0.32573
Product (drug)	Lugol's solution	1	1920.14	262.379	14052	0.00054	0.32573
Product (drug)	Ibritumomab tiuxetan	1	784.283	109.31	5627.11	0.00129	0.32573
Product (drug)	Acetyl l-carnitine	1	530.325	74.2441	3788.1	0.0019	0.32573
Product (drug)	Dioctyl sodium sulfosuccinate	1	506.219	70.8993	3614.39	0.00199	0.32573
Product (drug)	Plerixafor	1	318.195	44.7127	2264.41	0.00316	0.32573
Product (drug)	Zinecard	1	257.797	36.2641	1832.65	0.00389	0.32573
Product (drug)	Acetaminophen;codeine phosphate	1	254.265	35.7695	1807.43	0.00394	0.32573
Product (drug)	Mv	1	232.988	32.7885	1655.56	0.0043	0.32573
Product (drug)	Juice plus	1	218.369	30.7391	1551.28	0.00459	0.32573
Product (drug)	Pentostatin	1	114.341	16.1249	810.787	0.00873	0.32573
Product (drug)	Herbal	1	94.5401	13.3371	670.145	0.01054	0.32573
Product (drug)	Zevalin	1	70.3082	9.92289	498.166	0.01414	0.32573
Product (drug)	Ofatumumab	1	58.1254	8.20524	411.756	0.01708	0.32573
Product (drug)	Digitalis	1	48.0035	6.7776	339.993	0.02063	0.32573
Product (drug)	Decitabine	1	46.058	6.50313	326.202	0.0215	0.32573
Product (drug)	Radiotherapy	1	44.8342	6.33048	317.528	0.02208	0.32573
Product (drug)	Pronestyl	1	41.6797	5.8854	295.171	0.02373	0.32573
Product (drug)	Adcetris	1	41.0045	5.79012	290.386	0.02411	0.32573
Product (drug)	Procainamide	1	36.8281	5.20077	260.79	0.02681	0.32573
Product (drug)	Daunorubicin hcl	1	36.5381	5.15985	258.735	0.02702	0.32573
Product (drug)	Succinylcholine chloride	1	36.3473	5.13292	257.383	0.02716	0.32573
Product (drug)	Antibiotic	1	35.0214	4.9458	247.989	0.02817	0.32573
Product (drug)	Os Cal	1	33.1453	4.681	234.696	0.02974	0.32573
Product (drug)	Antineoplastic and immunomodulating agents	1	27.2961	3.85534	193.259	0.03599	0.32573
Product (drug)	Talwin	1	26.5542	3.75059	188.003	0.03698	0.32573
Product (drug)	Penicillin	1	26.3157	3.71693	186.314	0.03731	0.32573
Product (drug)	Tessalon	1	25.5901	3.61449	181.175	0.03834	0.32573
Product (drug)	Unspecified herbal	1	24.3268	3.43613	172.227	0.04029	0.32573
Product (drug)	Famvir	1	22.1144	3.12375	156.558	0.04423	0.32573
Product (drug)	Quinidine	1	20.8399	2.94378	147.531	0.04687	0.32573
Product (drug)	Amoxicillin trihydrate	1	20.662	2.91867	146.272	0.04727	0.32573
Product (drug)	Idelalisib	1	20.5174	2.89824	145.247	0.04759	0.32573
Product (drug)	Clonidine hcl	1	20.2709	2.86344	143.502	0.04816	0.32573
Product (drug)	Chloral hydrate	1	18.469	2.60899	130.742	0.05273	0.32573
Product (drug)	Pegfilgrastim	1	17.7791	2.51156	125.856	0.05471	0.32573
Product (drug)	Nitrous oxide	1	17.6327	2.49089	124.82	0.05516	0.32573
Product (drug)	Immunoglobulin human normal	1	16.2202	2.29141	114.818	0.05981	0.32573
Product (drug)	Oncovin	1	14.151	1.99916	100.167	0.06825	0.32573
Product (drug)	Propylthiouracil	1	14.1258	1.99561	99.989	0.06837	0.32573
Product (drug)	Daunorubicin	1	13.6581	1.92955	96.6773	0.07062	0.32573
Product (drug)	Vibramycin	1	13.608	1.92248	96.3229	0.07088	0.32573
Product (drug)	Ceftin	1	11.7427	1.65901	83.1169	0.08166	0.32573
Product (drug)	Nadolol	1	11.6033	1.63931	82.1295	0.0826	0.32573
Product (drug)	Macrobid	1	11.5503	1.63183	81.7546	0.08296	0.32573
Product (drug)	Lenalidomide	1	10.7831	1.52347	76.3233	0.0886	0.32573
Product (drug)	Dicyclomine	1	10.6065	1.49851	75.0728	0.09	0.32573
Product (drug)	Relafen	1	10.3348	1.46014	73.1497	0.09226	0.32573
Product (drug)	Streptomycin	1	9.56936	1.35201	67.7307	0.09926	0.32573
Product (drug)	Megace	1	8.97696	1.26833	63.5372	0.10545	0.32573
Product (drug)	Quinapril	1	8.83734	1.2486	62.5488	0.10702	0.32573
Product (drug)	Fexofenadine	1	8.58792	1.21337	60.7832	0.10995	0.32573
Product (drug)	Cardiovascular system	1	8.23851	1.16401	58.3098	0.11434	0.32573
Product (drug)	Kytril	1	7.84836	1.10889	55.548	0.11967	0.32573
Product (drug)	Sucralfate	1	7.66154	1.0825	54.2256	0.1224	0.32573
Product (drug)	Sotalol	1	7.63842	1.07923	54.062	0.12275	0.32573
Product (drug)	Senokot	1	6.71864	0.94929	47.5513	0.13834	0.32573
Product (drug)	Restoril	1	6.67435	0.94304	47.2378	0.13919	0.32573
Product (drug)	Ms contin	1	6.55879	0.92671	46.4198	0.14146	0.32573
Product (drug)	Zanaflex	1	6.5288	0.92247	46.2075	0.14206	0.32573
Product (drug)	Tylenol with codeine	1	6.41818	0.90684	45.4245	0.14432	0.32573
Product (drug)	Oxazepam	1	6.41152	0.9059	45.3775	0.14446	0.32573
Product (drug)	Enoxaparin	1	6.28631	0.88821	44.4911	0.14712	0.32573
Product (drug)	Thyroid	1	5.88627	0.8317	41.6596	0.15629	0.32573
Product (drug)	Soma	1	5.85286	0.82698	41.4231	0.15711	0.32573
Product (drug)	Niacin	1	5.80466	0.82017	41.0819	0.15831	0.32573
Product (drug)	Vitamin B-12	1	5.79982	0.81948	41.0477	0.15843	0.32573
Product (drug)	Loperamide	1	5.74715	0.81204	40.6748	0.15976	0.32573
Product (drug)	Hyzaar	1	5.72705	0.8092	40.5326	0.16027	0.32573
Product (drug)	Keflex	1	5.23298	0.7394	37.0355	0.17401	0.32573
Product (drug)	Zolpidem tartrate	1	4.90782	0.69346	34.7341	0.18441	0.32573
Product (drug)	Oxybutynin	1	4.84504	0.68459	34.2898	0.18656	0.32573
Product (drug)	Adriamycin	1	4.80989	0.67962	34.041	0.18779	0.32573
Product (drug)	Demerol	1	4.67698	0.66085	33.1002	0.19257	0.32573
Product (drug)	Proscar	1	4.46437	0.63081	31.5954	0.20076	0.32573
Product (drug)	Gemfibrozil	1	4.23937	0.59902	30.0029	0.21021	0.32573
Product (drug)	Cardura	1	4.13947	0.5849	29.2958	0.2147	0.32573
Product (drug)	Biaxin	1	4.1367	0.58451	29.2762	0.21483	0.32573
Product (drug)	Trazodone hcl	1	4.09502	0.57862	28.9812	0.21676	0.32573
Product (drug)	Enalapril maleate	1	4.09051	0.57798	28.9493	0.21697	0.32573
Product (drug)	Nystatin	1	3.96356	0.56005	28.0508	0.22308	0.32573
Product (drug)	Atarax	1	3.82945	0.5411	27.1017	0.22992	0.32573
Product (drug)	Medrol	1	3.78237	0.53445	26.7684	0.23242	0.32573
Product (drug)	Finasteride	1	3.69871	0.52263	26.1763	0.237	0.32573
Product (drug)	Investigational drug	1	3.65861	0.51696	25.8925	0.23926	0.32573
Product (drug)	Ultram	1	3.60672	0.50963	25.5252	0.24225	0.32573
Product (drug)	Lithium carbonate	1	3.55287	0.50202	25.1441	0.24543	0.32573
Product (drug)	Altace	1	3.54044	0.50027	25.0562	0.24618	0.32573
Product (drug)	Tramadol hcl	1	3.42587	0.48408	24.2453	0.25327	0.32573
Product (drug)	Dyazide	1	3.26555	0.46143	23.1106	0.2639	0.32573
Product (drug)	Phenergan	1	3.2644	0.46126	23.1024	0.26398	0.32573
Product (drug)	Remeron	1	3.24443	0.45844	22.9611	0.26537	0.32573
Product (drug)	Methotrexate	1	0.293	0.0414	2.07345	0.27383	0.32573
Product (drug)	Ascorbic acid	1	3.11572	0.44026	22.0501	0.27468	0.32573
Product (drug)	Oxygen	1	3.1098	0.43942	22.0083	0.27512	0.32573
Product (drug)	Nasonex	1	2.98734	0.42212	21.1416	0.28462	0.32573
Product (drug)	Cimetidine	1	2.96839	0.41944	21.0075	0.28615	0.32573
Product (drug)	Paroxetine	1	2.93723	0.41504	20.787	0.2887	0.32573
Product (drug)	Evista	1	2.84815	0.40245	20.1564	0.29624	0.32573
Product (drug)	Lovastatin	1	2.81219	0.39737	19.9019	0.2994	0.32573
Product (drug)	Cardizem	1	2.76925	0.3913	19.5981	0.30325	0.32573
Product (drug)	Reglan	1	2.68189	0.37896	18.9798	0.31141	0.32573
Product (drug)	Actonel	1	2.63818	0.37278	18.6704	0.31566	0.32573
Product (drug)	Neulasta	1	2.45153	0.34641	17.3495	0.33515	0.32573
Product (drug)	Diphenhydramine	1	2.45088	0.34632	17.3449	0.33522	0.32573
Product (drug)	Doxorubicin hydrochloride	1	2.44894	0.34604	17.3312	0.33544	0.32573
Product (drug)	Afinitor	1	2.42221	0.34227	17.1419	0.33843	0.32573
Product (drug)	Cipro	1	2.39481	0.33839	16.948	0.34155	0.32573
Product (drug)	Vitamin e	1	2.32929	0.32914	16.4843	0.34925	0.32573
Product (drug)	Prochlorperazine	1	2.18532	0.30879	15.4654	0.36742	0.32573
Product (drug)	Thalomid	1	2.17236	0.30696	15.3737	0.36915	0.32573
Product (drug)	Flomax	1	2.15613	0.30467	15.2588	0.37134	0.32573
Product (drug)	Asa	1	2.10606	0.29759	14.9044	0.37824	0.32573
Product (drug)	Lipitor	1	0.34185	0.04831	2.41917	0.38064	0.32573
Product (drug)	Nitroglycerin	1	2.05363	0.29019	14.5334	0.38574	0.32573
Product (drug)	Azithromycin	1	2.00591	0.28344	14.1957	0.39283	0.32573
Product (drug)	Coreg	1	1.97805	0.27951	13.9985	0.39708	0.32573
Product (drug)	Lovenox	1	1.73525	0.2452	12.2802	0.43833	0.32573
Product (drug)	Vitamins	1	1.68489	0.23808	11.9238	0.44794	0.32573
Product (drug)	Fluoxetine	1	1.65726	0.23418	11.7283	0.45338	0.32573
Product (drug)	Clopidogrel	1	1.5066	0.21289	10.662	0.48546	0.32573
Product (drug)	Valium	1	1.46295	0.20672	10.3531	0.49557	0.32573
Product (drug)	Prevacid	1	1.46133	0.20649	10.3417	0.49595	0.32573
Product (drug)	Revlimid	1	0.40425	0.05712	2.8608	0.52785	0.32573
Product (drug)	Metformin	1	0.40002	0.05653	2.83084	0.52802	0.32573
Product (drug)	Simvastatin	1	0.38401	0.05426	2.71751	0.5298	0.32573
Product (drug)	Protonix	1	1.32594	0.18736	9.38346	0.53005	0.32573
Product (drug)	Oxycodone	1	1.3072	0.18472	9.25085	0.53511	0.32573
Product (drug)	Metoclopramide	1	1.29906	0.18356	9.19323	0.53734	0.32573
Product (drug)	Zofran	1	1.24071	0.17532	8.78027	0.55383	0.32573
Product (drug)	Fish oil	1	1.12153	0.15848	7.93689	0.59055	0.32573
Product (drug)	Potassium chloride	1	1.04262	0.14733	7.37841	0.61735	0.32573
Product (drug)	Atenolol	1	0.48254	0.06819	3.41478	0.72879	0.32573
Product (drug)	Dexamethasone	1	0.45662	0.06452	3.23139	0.73075	0.32573
Product (drug)	Ibuprofen	1	0.42826	0.06052	3.03066	0.73527	0.32573
Product (drug)	Ciprofloxacin	1	0.97365	0.13758	6.89034	1	0.32573
Product (drug)	Zantac	1	0.90601	0.12803	6.41163	1	0.32573
Product (drug)	Ranitidine	1	0.86337	0.122	6.10991	1	0.32573
Product (drug)	Warfarin	1	0.83173	0.11753	5.88595	1	0.32573
Product (drug)	Neurontin	1	0.8106	0.11454	5.73643	1	0.32573
Product (drug)	Prozac	1	0.65967	0.09322	4.66833	1	0.32573
Product (drug)	Crestor	1	0.55761	0.07879	3.94607	1	0.32573
Product (drug)	Gabapentin	1	0.54422	0.0769	3.85131	1	0.32573
Product (drug)	Metoprolol	1	0.51392	0.07262	3.63687	1	0.32573
Reaction	Myelodysplastic syndrome	43	386.883	292.899	511.022	0	14.0065
Reaction	Acute myeloid leukaemia	27	280.498	195.457	402.54	0	8.79479
Reaction	Pyrexia	27	2.65209	1.84985	3.80224	1e-05	8.79479
Reaction	Fatigue	22	2.75178	1.83973	4.116	2e-05	7.16612
Reaction	Disease progression	20	28.2596	18.4962	43.1767	0	6.51466
Reaction	Dyspnoea	20	2.25166	1.47389	3.43986	0.00086	6.51466
Reaction	Thrombocytopenia	18	8.03168	5.13013	12.5743	0	5.86319
Reaction	Nausea	17	1.02455	0.64547	1.62625	0.89924	5.53746
Reaction	Febrile neutropenia	15	28.7219	17.5311	47.0563	0	4.88599
Reaction	Pancytopenia	15	22.6641	13.8339	37.1305	0	4.88599
Reaction	Anaemia	15	5.69119	3.47412	9.32312	0	4.88599
Reaction	Neutropenia	13	7.33131	4.30659	12.4804	0	4.23453
Reaction	Pneumonia	13	4.68039	2.74941	7.96756	1e-05	4.23453
Reaction	Hypotension	13	4.01696	2.3597	6.83816	3e-05	4.23453
Reaction	Chills	13	3.68929	2.16721	6.28033	7e-05	4.23453
Reaction	Malignant neoplasm progression	12	21.6768	12.4472	37.7502	0	3.90879
Reaction	Lymphadenopathy	12	16.5825	9.52222	28.8777	0	3.90879
Reaction	Infusion related reaction	11	24.8086	13.8846	44.3274	0	3.58306
Reaction	Infection	11	8.34696	4.67194	14.9128	0	3.58306
Reaction	Back pain	11	4.10573	2.2981	7.33519	0.0001	3.58306
Reaction	Rash	11	0.76184	0.42643	1.36106	0.4191	3.58306
Reaction	Platelet count decreased	10	11.0052	5.98154	20.248	0	3.25733
Reaction	Pain in extremity	10	2.81013	1.52743	5.17001	0.00349	3.25733
Reaction	Arthralgia	10	2.19391	1.19249	4.03629	0.0278	3.25733
Reaction	Asthenia	10	1.90179	1.03371	3.49884	0.04574	3.25733
Reaction	Vomiting	10	0.90155	0.49004	1.65863	0.87847	3.25733
Reaction	Drug ineffective	10	0.93126	0.50619	1.71329	1	3.25733
Reaction	White blood cell count decreased	9	8.55918	4.49636	16.2931	0	2.9316
Reaction	Cardiac failure congestive	9	7.94252	4.17242	15.1192	0	2.9316
Reaction	Weight decreased	9	3.65131	1.91818	6.95036	0.00097	2.9316
Reaction	Chest pain	9	2.88929	1.51787	5.49982	0.00459	2.9316
Reaction	Decreased appetite	9	2.83983	1.49189	5.40567	0.00512	2.9316
Reaction	Dizziness	9	0.82363	0.43269	1.56777	0.75648	2.9316
Reaction	Bone marrow failure	8	13.8449	6.98631	27.4366	0	2.60586
Reaction	Neuropathy peripheral	8	7.41577	3.74225	14.6954	2e-05	2.60586
Reaction	Oedema peripheral	8	2.87376	1.45024	5.69458	0.00757	2.60586
Reaction	Pruritus	8	0.64837	0.3272	1.28479	0.24508	2.60586
Reaction	Non-Hodgkin's lymphoma	7	150.092	72.0905	312.49	0	2.28013
Reaction	Lymphoma	7	60.7337	29.1885	126.371	0	2.28013
Reaction	Myocardial ischaemia	7	48.9008	23.5035	101.742	0	2.28013
Reaction	Pleural effusion	7	12.8915	6.19764	26.8153	0	2.28013
Reaction	Respiratory failure	7	12.1064	5.8202	25.182	0	2.28013
Reaction	Dehydration	7	5.16598	2.48369	10.7451	0.00049	2.28013
Reaction	Anaphylactic reaction	7	5.0224	2.41466	10.4464	0.00058	2.28013
Reaction	Diarrhoea	7	0.7874	0.37858	1.63772	0.73147	2.28013
Reaction	Upper respiratory tract infection	6	11.6478	5.27364	25.7261	2e-05	1.9544
Reaction	Haemoglobin decreased	6	6.14106	2.78054	13.5631	0.00051	1.9544
Reaction	Leukopenia	6	4.16964	1.88795	9.20887	0.00355	1.9544
Reaction	Headache	6	0.53636	0.24286	1.18455	0.12721	1.9544
Reaction	Death	6	0.99001	0.44827	2.18645	1	1.9544
Reaction	Atelectasis	5	47.3182	19.8291	112.916	0	1.62866
Reaction	Blood lactate dehydrogenase increased	5	26.8642	11.2595	64.0958	0	1.62866
Reaction	Cardio-respiratory arrest	5	12.5868	5.27606	30.0277	6e-05	1.62866
Reaction	Cellulitis	5	6.91093	2.89701	16.4863	0.00089	1.62866
Reaction	Sepsis	5	5.14669	2.15748	12.2775	0.00317	1.62866
Reaction	Nasopharyngitis	5	3.33354	1.39743	7.95207	0.01829	1.62866
Reaction	Syncope	5	2.60208	1.09081	6.20717	0.04531	1.62866
Reaction	Flushing	5	1.91223	0.80162	4.56152	0.19619	1.62866
Reaction	Chest discomfort	5	1.78784	0.74948	4.2648	0.21118	1.62866
Reaction	Myalgia	5	1.33664	0.56033	3.18847	0.43139	1.62866
Reaction	Abdominal pain	5	1.00601	0.42173	2.39977	0.82261	1.62866
Reaction	Cytogenetic abnormality	4	196.417	74.0622	520.906	0	1.30293
Reaction	Laryngeal pain	4	30.8841	11.6624	81.7864	1e-05	1.30293
Reaction	Cardiovascular disorder	4	9.84253	3.71742	26.0598	0.00081	1.30293
Reaction	Neutrophil count decreased	4	8.39406	3.17039	22.2245	0.00145	1.30293
Reaction	Herpes zoster	4	6.02609	2.27607	15.9546	0.00472	1.30293
Reaction	Gastrointestinal disorder	4	5.0924	1.92343	13.4824	0.00843	1.30293
Reaction	Aspartate aminotransferase increased	4	4.4624	1.68548	11.8144	0.01313	1.30293
Reaction	Feeling hot	4	3.73105	1.40926	9.87808	0.0235	1.30293
Reaction	Renal failure	4	3.67146	1.38675	9.7203	0.02473	1.30293
Reaction	Dysphagia	4	3.42587	1.29399	9.07007	0.03074	1.30293
Reaction	Drug hypersensitivity	4	3.31705	1.25289	8.78195	0.03398	1.30293
Reaction	Urticaria	4	0.45658	0.17246	1.20877	0.12065	1.30293
Reaction	Pain	4	0.5856	0.22119	1.55035	0.43332	1.30293
Reaction	Paraesthesia	4	1.27797	0.48271	3.3834	0.56107	1.30293
Reaction	Erythema	4	1.05433	0.39824	2.79131	0.79435	1.30293
Reaction	Cough	4	0.97735	0.36916	2.5875	1	1.30293
Reaction	Human anti-mouse antibody positive	3	27842	6994.61	110825	0	0.9772
Reaction	Chronic myelomonocytic leukaemia	3	729.486	234.828	2266.13	0	0.9772
Reaction	Pulmonary toxicity	3	102.11	33.0806	315.185	0	0.9772
Reaction	Diffuse large B-cell lymphoma	3	100.573	32.5832	310.436	0	0.9772
Reaction	Cardiotoxicity	3	91.1857	29.5447	281.433	1e-05	0.9772
Reaction	Lung neoplasm	3	69.6341	22.5668	214.869	1e-05	0.9772
Reaction	Odynophagia	3	53.3543	17.2938	164.607	3e-05	0.9772
Reaction	Refusal of treatment by patient	3	53.1675	17.2333	164.031	3e-05	0.9772
Reaction	Blood albumin decreased	3	42.9882	13.9353	132.612	5e-05	0.9772
Reaction	Bacteraemia	3	40.3996	13.0965	124.623	6e-05	0.9772
Reaction	Ejection fraction decreased	3	26.1428	8.47603	80.6326	0.00023	0.9772
Reaction	Disease recurrence	3	24.1859	7.84174	74.5957	0.00029	0.9772
Reaction	Serum sickness	3	20.6288	6.68867	63.6223	0.00046	0.9772
Reaction	Peripheral coldness	3	15.6842	5.08568	48.3699	0.001	0.9772
Reaction	Facial paralysis	3	14.4085	4.6721	44.4351	0.00128	0.9772
Reaction	Ear pain	3	12.7394	4.13096	39.2871	0.00181	0.9772
Reaction	Blood urea increased	3	10.7915	3.49937	33.2792	0.00289	0.9772
Reaction	Productive cough	3	10.4082	3.37511	32.0972	0.0032	0.9772
Reaction	Colitis	3	9.00503	2.92013	27.7695	0.00478	0.9772
Reaction	Hypoxia	3	8.75215	2.83813	26.9896	0.00517	0.9772
Reaction	Blood alkaline phosphatase increased	3	6.94517	2.25221	21.4169	0.00969	0.9772
Reaction	Throat tightness	3	6.86977	2.22776	21.1844	0.00997	0.9772
Reaction	Skin discolouration	3	4.69116	1.52131	14.4659	0.02705	0.9772
Reaction	Rash generalised	3	4.37791	1.41972	13.4999	0.0322	0.9772
Reaction	Hyperglycaemia	3	4.35815	1.41332	13.4389	0.03257	0.9772
Reaction	Blood pressure decreased	3	4.183	1.35652	12.8988	0.03608	0.9772
Reaction	Hyponatraemia	3	3.5537	1.15245	10.9582	0.05375	0.9772
Reaction	Sinusitis	3	3.4351	1.11399	10.5925	0.05829	0.9772
Reaction	Atrial fibrillation	3	3.39952	1.10245	10.4828	0.05975	0.9772
Reaction	Heart rate increased	3	3.06288	0.99328	9.44466	0.07628	0.9772
Reaction	Toxicity to various agents	3	2.97373	0.96437	9.16976	0.08164	0.9772
Reaction	Influenza like illness	3	2.17163	0.70426	6.69635	0.16171	0.9772
Reaction	Gastrointestinal haemorrhage	3	2.02211	0.65577	6.23528	0.18674	0.9772
Reaction	Oedema	3	1.73372	0.56225	5.346	0.25062	0.9772
Reaction	Dyspepsia	3	1.32886	0.43095	4.09759	0.49667	0.9772
Reaction	Abdominal pain upper	3	1.31352	0.42598	4.05029	0.501	0.9772
Reaction	Myocardial infarction	3	1.24814	0.40478	3.84868	0.52118	0.9772
Reaction	Fall	3	1.1709	0.37973	3.61051	0.74611	0.9772
Reaction	Hyperhidrosis	3	1.0301	0.33407	3.17634	0.76908	0.9772
Reaction	Tremor	3	0.9591	0.31104	2.95741	1	0.9772
Reaction	Splenic lesion	2	784.283	195.118	3152.45	0	0.65147
Reaction	Autoantibody positive	2	296.982	74.3334	1186.52	2e-05	0.65147
Reaction	Axonal neuropathy	2	287.031	71.8518	1146.62	2e-05	0.65147
Reaction	Quadriparesis	2	172.932	43.3512	689.842	7e-05	0.65147
Reaction	Blood pressure immeasurable	2	132.581	33.2526	528.613	0.00011	0.65147
Reaction	Acute lymphocytic leukaemia	2	124.018	31.1082	494.418	0.00013	0.65147
Reaction	Stem cell transplant	2	123.059	30.868	490.588	0.00013	0.65147
Reaction	Neck mass	2	100.061	25.1065	398.792	0.0002	0.65147
Reaction	Bile duct obstruction	2	97.0106	24.342	386.619	0.00021	0.65147
Reaction	Urinary bladder haemorrhage	2	96.9262	24.3208	386.282	0.00021	0.65147
Reaction	B-cell lymphoma	2	74.6936	18.7474	297.595	0.00035	0.65147
Reaction	Hepatic lesion	2	74.196	18.6226	295.611	0.00036	0.65147
Reaction	Hodgkin's disease	2	68.0735	17.0872	271.197	0.00042	0.65147
Reaction	Haemothorax	2	63.2056	15.8663	251.788	0.00049	0.65147
Reaction	Second primary malignancy	2	61.7683	15.5058	246.058	0.00051	0.65147
Reaction	Blood creatine increased	2	54.8882	13.7798	218.632	0.00065	0.65147
Reaction	Computerised tomogram abnormal	2	50.7141	12.7326	201.995	0.00076	0.65147
Reaction	Rales	2	49.8292	12.5105	198.468	0.00078	0.65147
Reaction	Necrosis	2	46.7737	11.7439	186.291	0.00089	0.65147
Reaction	Metastasis	2	38.1137	9.57055	151.784	0.00133	0.65147
Reaction	Areflexia	2	35.9368	9.02417	143.111	0.00149	0.65147
Reaction	Progressive multifocal leukoencephalopathy	2	35.4112	8.89223	141.017	0.00153	0.65147
Reaction	Hydronephrosis	2	35.3774	8.88376	140.882	0.00154	0.65147
Reaction	Arthropod bite	2	34.0575	8.55246	135.624	0.00165	0.65147
Reaction	Body temperature decreased	2	27.2427	6.84171	108.476	0.00256	0.65147
Reaction	Groin pain	2	23.3085	5.85398	92.8066	0.00347	0.65147
Reaction	Neurotoxicity	2	23.048	5.78857	91.7692	0.00355	0.65147
Reaction	Blood calcium decreased	2	22.3451	5.61209	88.9697	0.00377	0.65147
Reaction	Respiratory rate increased	2	20.6966	5.19814	82.4039	0.00437	0.65147
Reaction	Pericarditis	2	20.662	5.18947	82.2663	0.00438	0.65147
Reaction	Splenomegaly	2	20.5666	5.16551	81.8864	0.00442	0.65147
Reaction	Pulmonary congestion	2	17.8303	4.47842	70.9894	0.00583	0.65147
Reaction	Basal cell carcinoma	2	17.7621	4.46128	70.7176	0.00587	0.65147
Reaction	Lymphadenitis	2	16.642	4.18001	66.2572	0.00665	0.65147
Reaction	Meningitis	2	15.7166	3.94764	62.5724	0.00742	0.65147
Reaction	Prothrombin time prolonged	2	15.3379	3.85251	61.064	0.00778	0.65147
Reaction	Acute respiratory distress syndrome	2	14.8749	3.73624	59.2204	0.00825	0.65147
Reaction	Prostate cancer	2	14.5313	3.64997	57.8525	0.00863	0.65147
Reaction	Neoplasm progression	2	13.312	3.34375	52.9972	0.01019	0.65147
Reaction	Cardiomegaly	2	13.0883	3.28756	52.1064	0.01053	0.65147
Reaction	Blood sodium decreased	2	13.0438	3.2764	51.9294	0.0106	0.65147
Reaction	Post procedural complication	2	11.9085	2.99126	47.4088	0.01259	0.65147
Reaction	Metabolic acidosis	2	10.8588	2.72764	43.2294	0.01498	0.65147
Reaction	Red blood cell count decreased	2	9.94536	2.49821	39.5924	0.01766	0.65147
Reaction	Hypophagia	2	8.56481	2.15146	34.0959	0.02332	0.65147
Reaction	Dyspnoea exertional	2	8.46842	2.12725	33.7121	0.02381	0.65147
Reaction	Cerebral infarction	2	7.75005	1.94682	30.852	0.02803	0.65147
Reaction	Hyperbilirubinaemia	2	7.53251	1.89218	29.986	0.02953	0.65147
Reaction	Blood potassium decreased	2	7.24393	1.81969	28.8371	0.03171	0.65147
Reaction	Mucosal inflammation	2	6.99198	1.7564	27.834	0.03382	0.65147
Reaction	Therapy non-responder	2	6.08104	1.52759	24.2074	0.04349	0.65147
Reaction	Hepatic failure	2	6.02218	1.51281	23.9731	0.04425	0.65147
Reaction	Blood bilirubin increased	2	5.87571	1.47602	23.39	0.04624	0.65147
Reaction	Respiratory disorder	2	5.34371	1.34238	21.272	0.0547	0.65147
Reaction	Surgery	2	5.15761	1.29563	20.5312	0.05821	0.65147
Reaction	White blood cell count increased	2	4.85836	1.22047	19.3399	0.0646	0.65147
Reaction	Depressed level of consciousness	2	4.60351	1.15645	18.3253	0.07091	0.65147
Reaction	Body temperature increased	2	4.38319	1.10111	17.4483	0.07714	0.65147
Reaction	Agranulocytosis	2	3.82656	0.96128	15.2324	0.09703	0.65147
Reaction	Liver function test abnormal	2	3.6615	0.91982	14.5753	0.10441	0.65147
Reaction	Gastritis	2	3.47884	0.87393	13.8481	0.11359	0.65147
Reaction	Bone pain	2	3.17759	0.79826	12.6489	0.13156	0.65147
Reaction	General physical health deterioration	2	3.17053	0.79649	12.6208	0.13203	0.65147
Reaction	Haematuria	2	3.07231	0.77181	12.2298	0.13884	0.65147
Reaction	Jaundice	2	2.76932	0.6957	11.0237	0.16345	0.65147
Reaction	Adverse event	2	2.70534	0.67963	10.769	0.16946	0.65147
Reaction	Malaise	2	0.38169	0.09589	1.51931	0.18693	0.65147
Reaction	Cardiac arrest	2	2.00342	0.5033	7.97482	0.26362	0.65147
Reaction	Bradycardia	2	1.97907	0.49718	7.87788	0.26814	0.65147
Reaction	Rash pruritic	2	1.92712	0.48413	7.67108	0.27818	0.65147
Reaction	Alanine aminotransferase increased	2	1.83099	0.45998	7.28843	0.29822	0.65147
Reaction	Abdominal distension	2	1.62805	0.409	6.48057	0.34781	0.65147
Reaction	Dysgeusia	2	1.45355	0.36516	5.78597	0.40013	0.65147
Reaction	Loss of consciousness	2	1.44777	0.36371	5.76295	0.40204	0.65147
Reaction	Swelling	2	1.41596	0.35572	5.63633	0.65554	0.65147
Reaction	Muscular weakness	2	1.36334	0.3425	5.42685	0.66125	0.65147
Reaction	Acute kidney injury	2	1.27824	0.32112	5.08813	0.67237	0.65147
Reaction	Abdominal discomfort	2	1.11498	0.28011	4.43822	0.70146	0.65147
Reaction	Visual impairment	2	1.10852	0.27848	4.41251	0.70285	0.65147
Reaction	Hypersensitivity	2	0.66313	0.16659	2.6396	0.77486	0.65147
Reaction	Anxiety	2	0.60524	0.15205	2.40916	0.77812	0.65147
Reaction	Feeling abnormal	2	0.89006	0.2236	3.54293	1	0.65147
Reaction	Condition aggravated	2	0.86065	0.21621	3.42586	1	0.65147
Reaction	Confusional state	2	0.83986	0.21099	3.34308	1	0.65147
Reaction	Rash erythematous	2	0.73187	0.18386	2.91322	1	0.65147
Reaction	Constipation	2	0.72268	0.18155	2.87666	1	0.65147
Reaction	Seizure	2	0.70465	0.17702	2.80488	1	0.65147
Reaction	Injection site erythema	2	0.70293	0.17659	2.79802	1	0.65147
Reaction	Non-Hodgkin's lymphoma transformed recurrent	2	N/A	N/A	N/A	N/A	0.65147
Reaction	Synovial fluid crystal present	1	5062.19	655.54	39091.1	0.00022	0.32573
Reaction	Iodine uptake increased	1	4283.39	562.05	32643.8	0.00025	0.32573
Reaction	Asthma late onset	1	2651.62	357.782	19651.9	0.0004	0.32573
Reaction	Hepatobiliary cancer	1	2421.05	327.972	17871.9	0.00043	0.32573
Reaction	Malignant mesenteric neoplasm	1	2227.36	302.745	16387.2	0.00047	0.32573
Reaction	Non-Hodgkin's lymphoma stage III	1	1796.26	245.979	13117.2	0.00057	0.32573
Reaction	Polycystic liver disease	1	1687.4	231.508	12299	0.00061	0.32573
Reaction	Erythroleukaemia	1	1160.09	160.629	8378.28	0.00088	0.32573
Reaction	Exposure to radiation	1	1136.41	157.416	8203.91	0.0009	0.32573
Reaction	Lymphoma transformation	1	1091.84	151.361	7876.06	0.00093	0.32573
Reaction	Non-Hodgkin's lymphoma stage IV	1	856.678	119.249	6154.33	0.00118	0.32573
Reaction	Liver palpable	1	807.016	112.434	5792.52	0.00126	0.32573
Reaction	Dilatation intrahepatic duct acquired	1	640.047	89.4327	4580.66	0.00158	0.32573
Reaction	Thyroxine abnormal	1	625.664	87.445	4476.59	0.00161	0.32573
Reaction	Complement factor decreased	1	545.922	76.4068	3900.59	0.00185	0.32573
Reaction	Sarcoma uterus	1	530.325	74.2441	3788.1	0.0019	0.32573
Reaction	Mediastinal disorder	1	467.934	65.5812	3338.79	0.00215	0.32573
Reaction	Erythropoiesis abnormal	1	452.716	63.4655	3229.35	0.00222	0.32573
Reaction	Hydroureter	1	428.339	60.0738	3054.15	0.00235	0.32573
Reaction	Radiation mucositis	1	371.227	52.1162	2644.28	0.00271	0.32573
Reaction	Refractory anaemia with an excess of blasts	1	339.537	47.6938	2417.2	0.00296	0.32573
Reaction	Mycobacterium test positive	1	321.873	45.2267	2290.74	0.00312	0.32573
Reaction	Radiation oesophagitis	1	316.387	44.4601	2251.47	0.00317	0.32573
Reaction	Orthostatic hypertension	1	311.084	43.719	2213.53	0.00323	0.32573
Reaction	Non-Hodgkin's lymphoma recurrent	1	304.285	42.7685	2164.89	0.0033	0.32573
Reaction	Positron emission tomogram abnormal	1	279.82	39.3468	1989.97	0.00359	0.32573
Reaction	Capillary disorder	1	253.11	35.6076	1799.18	0.00396	0.32573
Reaction	Refractory cytopenia with unilineage dysplasia	1	248.59	34.9746	1766.91	0.00403	0.32573
Reaction	Urinary tract infection pseudomonal	1	228.214	32.1193	1621.5	0.00439	0.32573
Reaction	Pleural disorder	1	217.516	30.6195	1545.2	0.0046	0.32573
Reaction	Suprapubic pain	1	184.997	26.0567	1313.44	0.00541	0.32573
Reaction	Infusion site haematoma	1	180.207	25.3843	1279.32	0.00555	0.32573
Reaction	Urine leukocyte esterase positive	1	177.338	24.9813	1258.89	0.00564	0.32573
Reaction	Tongue exfoliation	1	167.22	23.5602	1186.85	0.00598	0.32573
Reaction	Flight of ideas	1	165.235	23.2813	1172.72	0.00605	0.32573
Reaction	Meningoencephalitis herpetic	1	164.746	23.2126	1169.24	0.00607	0.32573
Reaction	Chronic hepatitis	1	160.473	22.6123	1138.83	0.00623	0.32573
Reaction	Platelet transfusion	1	155.109	21.8585	1100.66	0.00644	0.32573
Reaction	Hepatitis B antibody positive	1	150.092	21.1534	1064.96	0.00666	0.32573
Reaction	PCO2 increased	1	138.518	19.5261	982.64	0.00721	0.32573
Reaction	Mantle cell lymphoma	1	133.856	18.8705	949.493	0.00746	0.32573
Reaction	Bladder dilatation	1	132.266	18.6469	938.19	0.00755	0.32573
Reaction	Laryngeal cancer	1	131.021	18.4718	929.339	0.00762	0.32573
Reaction	Groin abscess	1	130.103	18.3427	922.811	0.00767	0.32573
Reaction	Hyperplasia	1	129.498	18.2575	918.509	0.00771	0.32573
Reaction	Neutropenic infection	1	127.133	17.9248	901.695	0.00785	0.32573
Reaction	Acarodermatitis	1	123.742	17.4479	877.597	0.00807	0.32573
Reaction	Heart sounds abnormal	1	118.477	16.7069	840.175	0.00842	0.32573
Reaction	Metastases to meninges	1	115.527	16.2919	819.215	0.00864	0.32573
Reaction	Haemophilus infection	1	113.179	15.9614	802.531	0.00881	0.32573
Reaction	Aortic calcification	1	112.949	15.9291	800.9	0.00883	0.32573
Reaction	Hepatic mass	1	108.971	15.369	772.634	0.00915	0.32573
Reaction	Procedural hypotension	1	105.863	14.9316	750.56	0.00942	0.32573
Reaction	Streptococcal sepsis	1	105.662	14.9033	749.133	0.00944	0.32573
Reaction	Biliary dilatation	1	102.928	14.5183	729.712	0.00969	0.32573
Reaction	Lip and/or oral cavity cancer	1	102.173	14.412	724.346	0.00976	0.32573
Reaction	Cytogenetic analysis abnormal	1	98.5559	13.9027	698.661	0.01011	0.32573
Reaction	Bone marrow toxicity	1	96.5062	13.614	684.106	0.01033	0.32573
Reaction	Cancer pain	1	92.0398	12.985	652.394	0.01082	0.32573
Reaction	Gastrointestinal ulcer haemorrhage	1	77.5545	10.9442	549.579	0.01283	0.32573
Reaction	Scrotal oedema	1	76.6998	10.8238	543.515	0.01297	0.32573
Reaction	Subclavian vein thrombosis	1	76.2796	10.7645	540.532	0.01304	0.32573
Reaction	Spinal deformity	1	74.2455	10.4779	526.099	0.0134	0.32573
Reaction	Peripheral embolism	1	66.4488	9.37884	470.788	0.01495	0.32573
Reaction	Oral mucosal exfoliation	1	64.3747	9.08642	456.076	0.01543	0.32573
Reaction	Neutrophil count abnormal	1	61.4615	8.67567	435.415	0.01616	0.32573
Reaction	Lung consolidation	1	56.3034	7.9483	398.837	0.01762	0.32573
Reaction	White blood cells urine positive	1	55.0238	7.76783	389.764	0.01803	0.32573
Reaction	Antibody test positive	1	52.8814	7.46566	374.574	0.01875	0.32573
Reaction	Red blood cell abnormality	1	50.9461	7.19269	360.853	0.01946	0.32573
Reaction	Lung adenocarcinoma	1	50.3929	7.11465	356.931	0.01967	0.32573
Reaction	Ejection fraction abnormal	1	49.9409	7.0509	353.727	0.01984	0.32573
Reaction	Neoplasm recurrence	1	48.295	6.81871	342.059	0.02051	0.32573
Reaction	Acute leukaemia	1	46.0961	6.50851	326.473	0.02148	0.32573
Reaction	Intermittent claudication	1	45.1615	6.37665	319.848	0.02192	0.32573
Reaction	Microcytic anaemia	1	44.264	6.25003	313.487	0.02236	0.32573
Reaction	Abdominal rigidity	1	38.4028	5.423	271.949	0.02572	0.32573
Reaction	Blood chloride decreased	1	37.2718	5.26339	263.934	0.02649	0.32573
Reaction	Staphylococcal bacteraemia	1	37.0733	5.23537	262.527	0.02663	0.32573
Reaction	Retroperitoneal haematoma	1	36.6102	5.17002	259.246	0.02696	0.32573
Reaction	Hepatic neoplasm	1	36.5621	5.16323	258.905	0.027	0.32573
Reaction	Bronchiectasis	1	36.4425	5.14635	258.057	0.02709	0.32573
Reaction	Bundle branch block	1	36.2999	5.12623	257.047	0.02719	0.32573
Reaction	Chronic lymphocytic leukaemia	1	36.182	5.10959	256.212	0.02728	0.32573
Reaction	Urine output increased	1	36.0182	5.08647	255.051	0.0274	0.32573
Reaction	Platelet disorder	1	32.7939	4.63141	232.206	0.03005	0.32573
Reaction	Urinary tract obstruction	1	30.9184	4.36668	218.919	0.03184	0.32573
Reaction	Pancreatic disorder	1	29.4625	4.16116	208.605	0.03339	0.32573
Reaction	Haematotoxicity	1	29.1387	4.11545	206.311	0.03376	0.32573
Reaction	Protein urine present	1	26.4156	3.73103	187.022	0.03717	0.32573
Reaction	Non-cardiac chest pain	1	25.6846	3.62782	181.844	0.03821	0.32573
Reaction	Nuclear magnetic resonance imaging brain abnormal	1	25.649	3.62281	181.592	0.03826	0.32573
Reaction	White blood cell disorder	1	25.4731	3.59796	180.346	0.03852	0.32573
Reaction	Haemoglobin abnormal	1	25.3571	3.58158	179.524	0.03869	0.32573
Reaction	Staphylococcal sepsis	1	25.0942	3.54448	177.662	0.03909	0.32573
Reaction	Congestive cardiomyopathy	1	25.0266	3.53492	177.183	0.03919	0.32573
Reaction	Blood pressure diastolic decreased	1	24.9593	3.52542	176.706	0.03929	0.32573
Reaction	Cystitis haemorrhagic	1	24.8701	3.51283	176.075	0.03943	0.32573
Reaction	Breath sounds abnormal	1	24.4873	3.45879	173.364	0.04003	0.32573
Reaction	Occult blood positive	1	23.2599	3.28548	164.67	0.0421	0.32573
Reaction	Arthritis bacterial	1	22.812	3.22225	161.498	0.04291	0.32573
Reaction	Ocular icterus	1	22.7375	3.21173	160.97	0.04305	0.32573
Reaction	Tumour lysis syndrome	1	22.5533	3.18572	159.666	0.04339	0.32573
Reaction	Renal cell carcinoma	1	22.0357	3.11263	156	0.04439	0.32573
Reaction	Excoriation	1	21.7346	3.07012	153.868	0.04499	0.32573
Reaction	Clostridial infection	1	21.0925	2.97945	149.32	0.04632	0.32573
Reaction	Subcutaneous abscess	1	21.0129	2.96821	148.756	0.0465	0.32573
Reaction	Herpes virus infection	1	18.5428	2.61941	131.265	0.05252	0.32573
Reaction	Activated partial thromboplastin time prolonged	1	17.6495	2.49326	124.939	0.05511	0.32573
Reaction	Lymphoedema	1	17.6327	2.49089	124.82	0.05516	0.32573
Reaction	Jaw disorder	1	16.548	2.33771	117.139	0.05866	0.32573
Reaction	Renal cyst	1	15.5499	2.19674	110.072	0.06231	0.32573
Reaction	Hepatic cancer	1	15.485	2.18758	109.612	0.06256	0.32573
Reaction	Hepatic necrosis	1	15.0987	2.13302	106.877	0.06411	0.32573
Reaction	Arterial occlusive disease	1	14.8968	2.1045	105.447	0.06495	0.32573
Reaction	Decubitus ulcer	1	14.3479	2.02697	101.561	0.06735	0.32573
Reaction	Adrenal insufficiency	1	14.2633	2.01503	100.963	0.06773	0.32573
Reaction	Malnutrition	1	14.1654	2.0012	100.269	0.06818	0.32573
Reaction	Pleurisy	1	14.1618	2.00069	100.243	0.0682	0.32573
Reaction	Blood disorder	1	14.1546	1.99967	100.192	0.06823	0.32573
Reaction	Squamous cell carcinoma	1	13.991	1.97657	99.0341	0.069	0.32573
Reaction	Hyperuricaemia	1	13.4763	1.90387	95.3902	0.07154	0.32573
Reaction	Jaundice cholestatic	1	13.4698	1.90295	95.344	0.07158	0.32573
Reaction	Coronary artery bypass	1	13.447	1.89974	95.1828	0.07169	0.32573
Reaction	Extravasation	1	12.8988	1.8223	91.3014	0.07462	0.32573
Reaction	Atrial flutter	1	12.8512	1.81558	90.9642	0.07489	0.32573
Reaction	Hypoventilation	1	12.314	1.73971	87.1615	0.07802	0.32573
Reaction	Aortic valve incompetence	1	12.1131	1.71133	85.7391	0.07927	0.32573
Reaction	Encephalitis	1	11.9854	1.69329	84.8347	0.08008	0.32573
Reaction	Stridor	1	11.9699	1.6911	84.7252	0.08017	0.32573
Reaction	Decreased activity	1	11.6812	1.65032	82.6809	0.08207	0.32573
Reaction	Emphysema	1	11.6372	1.64411	82.3698	0.08237	0.32573
Reaction	Blood test abnormal	1	11.5503	1.63183	81.7546	0.08296	0.32573
Reaction	Increased tendency to bruise	1	11.4813	1.62208	81.2656	0.08344	0.32573
Reaction	Bladder disorder	1	11.2675	1.59189	79.7525	0.08495	0.32573
Reaction	Hair texture abnormal	1	10.7561	1.51964	76.1316	0.08881	0.32573
Reaction	Incontinence	1	10.6572	1.50568	75.4321	0.08959	0.32573
Reaction	Eye discharge	1	10.4199	1.47216	73.7521	0.09154	0.32573
Reaction	Bedridden	1	10.4005	1.46941	73.6143	0.0917	0.32573
Reaction	Angiopathy	1	10.0332	1.41753	71.0141	0.09489	0.32573
Reaction	Herpes simplex	1	9.48622	1.34027	67.1422	0.10008	0.32573
Reaction	Intestinal perforation	1	9.37443	1.32447	66.3508	0.10121	0.32573
Reaction	Acidosis	1	9.30239	1.3143	65.8408	0.10195	0.32573
Reaction	Subarachnoid haemorrhage	1	8.97118	1.26751	63.4962	0.10551	0.32573
Reaction	Dialysis	1	8.8938	1.25658	62.9485	0.10638	0.32573
Reaction	Pain of skin	1	8.60252	1.21543	60.8865	0.10978	0.32573
Reaction	Electrolyte imbalance	1	8.59455	1.2143	60.8301	0.10987	0.32573
Reaction	Full blood count decreased	1	8.57074	1.21094	60.6616	0.11016	0.32573
Reaction	Hepatomegaly	1	8.47164	1.19694	59.9601	0.11138	0.32573
Reaction	Muscle atrophy	1	8.30858	1.17391	58.8058	0.11343	0.32573
Reaction	Laryngitis	1	8.06315	1.13923	57.0684	0.11668	0.32573
Reaction	Urine analysis abnormal	1	7.9198	1.11898	56.0537	0.11866	0.32573
Reaction	Micturition urgency	1	7.89733	1.11581	55.8947	0.11897	0.32573
Reaction	Neoplasm	1	7.80983	1.10345	55.2753	0.12022	0.32573
Reaction	Lymphopenia	1	7.79453	1.10129	55.167	0.12044	0.32573
Reaction	Thyroid disorder	1	7.71355	1.08985	54.5937	0.12163	0.32573
Reaction	Hypercalcaemia	1	7.48241	1.05719	52.9576	0.12514	0.32573
Reaction	Gastrointestinal pain	1	7.23546	1.02231	51.2096	0.12912	0.32573
Reaction	Parosmia	1	7.19991	1.01728	50.9579	0.12972	0.32573
Reaction	Hepatic cirrhosis	1	7.09081	1.00187	50.1857	0.13158	0.32573
Reaction	Mitral valve incompetence	1	6.97708	0.9858	49.3807	0.13357	0.32573
Reaction	Hyperaesthesia	1	6.96051	0.98346	49.2634	0.13387	0.32573
Reaction	Blood potassium increased	1	6.87288	0.97108	48.6431	0.13545	0.32573
Reaction	Post procedural haemorrhage	1	6.81818	0.96336	48.2559	0.13646	0.32573
Reaction	Injection site pain	1	0.22887	0.03234	1.61963	0.14142	0.32573
Reaction	Sinus tachycardia	1	6.52039	0.92128	46.148	0.14223	0.32573
Reaction	Scar	1	6.36754	0.89969	45.0661	0.14538	0.32573
Reaction	Musculoskeletal chest pain	1	6.1782	0.87294	43.7259	0.14949	0.32573
Reaction	Device related infection	1	6.13396	0.86669	43.4128	0.15048	0.32573
Reaction	Injection site irritation	1	6.09235	0.86081	43.1183	0.15143	0.32573
Reaction	Rash morbilliform	1	5.97533	0.84428	42.29	0.15415	0.32573
Reaction	Respiratory tract infection	1	5.82957	0.82369	41.2583	0.15769	0.32573
Reaction	Toothache	1	5.54678	0.78373	39.2566	0.16503	0.32573
Reaction	Electrocardiogram abnormal	1	5.37907	0.76004	38.0695	0.16971	0.32573
Reaction	Hiccups	1	5.13028	0.72489	36.3087	0.17716	0.32573
Reaction	Hyperthyroidism	1	5.12792	0.72456	36.2919	0.17724	0.32573
Reaction	Bone disorder	1	5.10348	0.7211	36.119	0.17801	0.32573
Reaction	Cardiomyopathy	1	5.10021	0.72064	36.0958	0.17811	0.32573
Reaction	Fluid overload	1	5.06541	0.71573	35.8495	0.17922	0.32573
Reaction	Drug administered at inappropriate site	1	4.81155	0.67986	34.0527	0.18773	0.32573
Reaction	Chronic kidney disease	1	4.79911	0.6781	33.9647	0.18817	0.32573
Reaction	Hallucination, visual	1	4.59629	0.64945	32.5291	0.1956	0.32573
Reaction	Insomnia	1	0.26131	0.03693	1.84925	0.19577	0.32573
Reaction	Subdural haematoma	1	4.58645	0.64806	32.4595	0.19598	0.32573
Reaction	Bladder cancer	1	4.58343	0.64763	32.4381	0.19609	0.32573
Reaction	Skin lesion	1	4.5386	0.64129	32.1208	0.19782	0.32573
Reaction	Septic shock	1	4.45508	0.62949	31.5297	0.20113	0.32573
Reaction	Systemic lupus erythematosus	1	4.43839	0.62714	31.4116	0.20181	0.32573
Reaction	Pneumonitis	1	4.43698	0.62694	31.4016	0.20186	0.32573
Reaction	Haematocrit decreased	1	4.28372	0.60528	30.3168	0.20828	0.32573
Reaction	Psychomotor hyperactivity	1	4.26437	0.60255	30.1798	0.20912	0.32573
Reaction	Vasculitis	1	4.20606	0.59431	29.7672	0.21169	0.32573
Reaction	Colitis ulcerative	1	4.09864	0.57913	29.0069	0.21659	0.32573
Reaction	Head injury	1	4.06009	0.57369	28.734	0.2184	0.32573
Reaction	Shock	1	4.01616	0.56748	28.4231	0.22051	0.32573
Reaction	Photophobia	1	3.85624	0.54488	27.2912	0.22852	0.32573
Reaction	Pulmonary hypertension	1	3.79475	0.5362	26.856	0.23176	0.32573
Reaction	Faeces discoloured	1	3.60322	0.50914	25.5004	0.24245	0.32573
Reaction	Hypersomnia	1	3.57087	0.50456	25.2715	0.24436	0.32573
Reaction	Mental status changes	1	3.48418	0.49232	24.6579	0.24961	0.32573
Reaction	Accidental exposure to product	1	3.40159	0.48065	24.0734	0.25482	0.32573
Reaction	Fungal infection	1	3.39062	0.4791	23.9958	0.25553	0.32573
Reaction	Encephalopathy	1	3.38958	0.47895	23.9885	0.2556	0.32573
Reaction	Hypothyroidism	1	3.33518	0.47126	23.6034	0.25918	0.32573
Reaction	Laboratory test abnormal	1	3.32244	0.46946	23.5132	0.26003	0.32573
Reaction	Gastric disorder	1	3.24783	0.45892	22.9852	0.26513	0.32573
Reaction	Respiratory distress	1	3.19473	0.45142	22.6093	0.26889	0.32573
Reaction	Apnoea	1	3.19033	0.4508	22.5783	0.2692	0.32573
Reaction	Electrocardiogram QT prolonged	1	3.17832	0.4491	22.4932	0.27007	0.32573
Reaction	Night sweats	1	3.14227	0.44401	22.2381	0.2727	0.32573
Reaction	Movement disorder	1	3.11171	0.43969	22.0218	0.27498	0.32573
Reaction	Complication associated with device	1	3.00492	0.4246	21.266	0.28322	0.32573
Reaction	Orthostatic hypotension	1	3.00151	0.42412	21.2419	0.28349	0.32573
Reaction	Drug level increased	1	2.93043	0.41408	20.7388	0.28926	0.32573
Reaction	Pharyngeal oedema	1	2.84902	0.40257	20.1626	0.29617	0.32573
Reaction	Cholelithiasis	1	2.80397	0.39621	19.8438	0.30013	0.32573
Reaction	Inflammation	1	2.75418	0.38917	19.4914	0.30463	0.32573
Reaction	Ageusia	1	2.7244	0.38496	19.2807	0.30739	0.32573
Reaction	Ataxia	1	2.68176	0.37894	18.9789	0.31142	0.32573
Reaction	Viral infection	1	2.64671	0.37399	18.7308	0.31482	0.32573
Reaction	Cognitive disorder	1	2.63843	0.37282	18.6722	0.31563	0.32573
Reaction	Transient ischaemic attack	1	2.62525	0.37095	18.5789	0.31694	0.32573
Reaction	Feeling cold	1	2.59781	0.36708	18.3847	0.31968	0.32573
Reaction	Amenorrhoea	1	2.59551	0.36675	18.3684	0.31991	0.32573
Reaction	Neoplasm malignant	1	2.58791	0.36568	18.3147	0.32068	0.32573
Reaction	Oxygen saturation decreased	1	2.41538	0.3413	17.0936	0.3392	0.32573
Reaction	Drug intolerance	1	2.20863	0.31209	15.6304	0.36436	0.32573
Reaction	Mouth ulceration	1	2.12381	0.3001	15.0301	0.37576	0.32573
Reaction	Urinary retention	1	2.09701	0.29632	14.8405	0.37951	0.32573
Reaction	Pulmonary oedema	1	2.0963	0.29622	14.8354	0.37961	0.32573
Reaction	Palpitations	1	0.33557	0.04742	2.37473	0.38125	0.32573
Reaction	Depression	1	0.32709	0.04622	2.3147	0.38291	0.32573
Reaction	Eye irritation	1	2.0722	0.29281	14.6648	0.38305	0.32573
Reaction	Rash maculo-papular	1	0.32569	0.04602	2.30483	0.38329	0.32573
Reaction	Wheezing	1	2.03695	0.28783	14.4154	0.38819	0.32573
Reaction	Underdose	1	2.02149	0.28565	14.306	0.39049	0.32573
Reaction	Disorientation	1	2.00598	0.28345	14.1962	0.39282	0.32573
Reaction	Discomfort	1	1.94339	0.27461	13.7533	0.4025	0.32573
Reaction	Throat irritation	1	1.87507	0.26496	13.2698	0.41362	0.32573
Reaction	Emotional distress	1	1.8723	0.26456	13.2501	0.41408	0.32573
Reaction	Pollakiuria	1	1.83027	0.25863	12.9527	0.42124	0.32573
Reaction	International normalised ratio increased	1	1.79077	0.25304	12.6731	0.42818	0.32573
Reaction	Nasal congestion	1	1.73196	0.24473	12.2569	0.43895	0.32573
Reaction	Neck pain	1	1.63158	0.23055	11.5465	0.45856	0.32573
Reaction	Dry skin	1	1.61506	0.22822	11.4296	0.46195	0.32573
Reaction	Rectal haemorrhage	1	1.59691	0.22565	11.3011	0.46573	0.32573
Reaction	Eye pain	1	1.49211	0.21084	10.5595	0.48877	0.32573
Reaction	Disturbance in attention	1	1.46395	0.20686	10.3601	0.49533	0.32573
Reaction	Speech disorder	1	1.46275	0.2067	10.3517	0.49562	0.32573
Reaction	Blister	1	1.46022	0.20634	10.3338	0.49621	0.32573
Reaction	Drug administration error	1	1.43983	0.20346	10.1895	0.50109	0.32573
Reaction	Stevens-Johnson syndrome	1	1.42802	0.20179	10.1059	0.50395	0.32573
Reaction	Thrombosis	1	1.40819	0.19899	9.96557	0.50883	0.32573
Reaction	Dysphonia	1	1.4062	0.1987	9.95147	0.50932	0.32573
Reaction	Swelling face	1	1.38109	0.19516	9.77376	0.51564	0.32573
Reaction	Hypokalaemia	1	1.3392	0.18924	9.47734	0.52651	0.32573
Reaction	Weight increased	1	0.39471	0.05578	2.79326	0.5284	0.32573
Reaction	Pancreatitis	1	1.32379	0.18706	9.36829	0.53062	0.32573
Reaction	Off label use	1	0.35586	0.05029	2.51835	0.53807	0.32573
Reaction	Stomatitis	1	1.28785	0.18198	9.11392	0.54044	0.32573
Reaction	Lethargy	1	1.22063	0.17248	8.63822	0.55972	0.32573
Reaction	Anaphylactoid reaction	1	1.21145	0.17118	8.5732	0.56246	0.32573
Reaction	Joint swelling	1	1.18552	0.16752	8.38976	0.57031	0.32573
Reaction	Hepatitis	1	1.1824	0.16708	8.36767	0.57126	0.32573
Reaction	Drug effect decreased	1	1.16516	0.16464	8.24563	0.57661	0.32573
Reaction	Injury	1	1.159	0.16377	8.20203	0.57854	0.32573
Reaction	Balance disorder	1	1.12833	0.15944	7.98497	0.58834	0.32573
Reaction	Exposure during pregnancy	1	1.11044	0.15691	7.85838	0.59419	0.32573
Reaction	Burning sensation	1	1.10013	0.15546	7.78541	0.59761	0.32573
Reaction	Amnesia	1	1.04825	0.14812	7.41827	0.61537	0.32573
Reaction	Oropharyngeal pain	1	1.01482	0.1434	7.18167	0.6273	0.32573
Reaction	Blood glucose increased	1	0.50026	0.07069	3.54019	0.72844	0.32573
Reaction	Product quality issue	1	0.47171	0.06666	3.33818	0.72939	0.32573
Reaction	Muscle spasms	1	0.44395	0.06273	3.14174	0.73244	0.32573
Reaction	Hypoglycaemia	1	0.96871	0.13688	6.85534	1	0.32573
Reaction	Irritability	1	0.90773	0.12827	6.42385	1	0.32573
Reaction	Epistaxis	1	0.87141	0.12314	6.1668	1	0.32573
Reaction	Memory impairment	1	0.86621	0.1224	6.12996	1	0.32573
Reaction	Hallucination	1	0.85362	0.12062	6.04088	1	0.32573
Reaction	Incorrect dose administered	1	0.80996	0.11445	5.73193	1	0.32573
Reaction	Wrong technique in product usage process	1	0.80346	0.11354	5.68594	1	0.32573
Reaction	Overdose	1	0.77277	0.1092	5.46871	1	0.32573
Reaction	Urinary tract infection	1	0.77033	0.10885	5.45146	1	0.32573
Reaction	Anaphylactic shock	1	0.74919	0.10587	5.30183	1	0.32573
Reaction	No adverse event	1	0.71921	0.10163	5.08968	1	0.32573
Reaction	Therapeutic response decreased	1	0.71765	0.10141	5.07866	1	0.32573
Reaction	Blood pressure increased	1	0.67059	0.09476	4.74558	1	0.32573
Reaction	Agitation	1	0.62592	0.08845	4.42952	1	0.32573
Reaction	Dry mouth	1	0.57954	0.08189	4.10127	1	0.32573
Reaction	Face oedema	1	0.55482	0.0784	3.92633	1	0.32573
Serious	TRUE	229	2.2933	2.14836	2.44803	0	74.5928
Serious	FALSE	76	0.59077	0.48609	0.71798	0	24.7557

## Sheet: Zevalin.Data.FAERS.Stats
CONCEPT	NAME	CONCEPT_AES_IN_COHORT	PRR	PRR_95CI(-)	PRR_95CI(+)	P-value Fisher Exact Test (two tailed)	COHORT_%COVERAGE
Concept Drug	Ibritumomab	1196	N/A	N/A	N/A	N/A	100
Concept Drug	Rituximab	839	95.9944	92.4293	99.697	0	70.1505
Concept Drug	Cyclophosphamide	301	27.8713	25.2695	30.7409	0	25.1672
Concept Drug	Fludarabine	283	129.18	116.528	143.207	0	23.6622
Concept Drug	Etoposide	263	72.4901	65.1025	80.716	0	21.99
Concept Drug	Vincristine	257	48.666	43.6475	54.2614	0	21.4883
Concept Drug	Doxorubicin	238	33.6806	30.0498	37.7499	0	19.8997
Concept Drug	Cytarabine	200	62.4032	54.9506	70.8667	0	16.7224
Concept Drug	Prednisone	186	6.58195	5.76721	7.51179	0	15.5518
Concept Drug	Melphalan	173	84.8528	73.8532	97.4908	0	14.4649
Concept Drug	Cyclosporine	135	17.1827	14.6551	20.1462	0	11.2876
Concept Drug	Carmustine	130	412.781	349.001	488.217	0	10.8696
Concept Drug	Filgrastim	99	30.6041	25.3304	36.9758	0	8.27759
Concept Drug	Dexamethasone	99	5.47798	4.53577	6.61592	0	8.27759
Concept Drug	Cisplatin	81	15.4433	12.5114	19.0623	0	6.77258
Concept Drug	Prednisolone	80	6.37146	5.15539	7.87438	0	6.68896
Concept Drug	Busulfan	78	79.5943	64.1361	98.7782	0	6.52174
Concept Drug	Carboplatin	76	13.9624	11.2297	17.3602	0	6.35452
Concept Drug	Ifosfamide	75	64.3149	51.6018	80.1602	0	6.2709
Concept Drug	Yttrium Y-90	63	7229.04	5083.35	10280.4	0	5.26756
Concept Drug	Trimethoprim	60	6.63452	5.18387	8.49112	0	5.01672
Concept Drug	Methotrexate	60	2.11804	1.65507	2.71051	0	5.01672
Concept Drug	Acetaminophen	54	0.9092	0.70058	1.17993	0.50607	4.51505
Concept Drug	Bendamustine	48	33.68	25.5084	44.4693	0	4.01338
Concept Drug	Chlorpheniramine	45	17.9841	13.4968	23.9632	0	3.76254
Concept Drug	Mitoxantrone	43	65.577	48.8256	88.0756	0	3.59532
Concept Drug	Methylprednisolone	33	4.10322	2.93062	5.74501	0	2.7592
Concept Drug	Allopurinol	33	3.09039	2.20729	4.32681	0	2.7592
Concept Drug	Sulfamethoxazole	30	4.47837	3.14498	6.37707	0	2.50836
Concept Drug	Pegfilgrastim	28	6.58592	4.56631	9.49877	0	2.34114
Concept Drug	Fluconazole	28	6.04341	4.19023	8.71619	0	2.34114
Concept Drug	Aciclovir	27	4.11282	2.83225	5.97239	0	2.25753
Concept Drug	Omeprazole	27	0.84983	0.58528	1.23396	0.4709	2.25753
Concept Drug	Loxoprofen	26	14.2137	9.71438	20.797	0	2.17391
Concept Drug	Lorazepam	24	1.76471	1.18754	2.62239	0.00876	2.00669
Concept Drug	Acetylsalicylic acid	23	0.37313	0.24893	0.55929	0	1.92308
Concept Drug	Indium	22	7706.14	4182.02	14200	0	1.83946
Concept Drug	Pantoprazole	22	1.31279	0.86771	1.98617	0.21585	1.83946
Concept Drug	Levothyroxine	20	0.53123	0.34398	0.82041	0.00209	1.67224
Concept Drug	Furosemide	20	0.68888	0.44606	1.06388	0.09087	1.67224
Concept Drug	Valaciclovir	19	4.31543	2.76208	6.74238	0	1.58863
Concept Drug	Ciprofloxacin	19	2.51009	1.60667	3.92149	0.00032	1.58863
Concept Drug	Chlorambucil	18	55.7448	35.1756	88.342	0	1.50502
Concept Drug	Meropenem	18	10.9834	6.94145	17.3788	0	1.50502
Concept Drug	Cladribine	17	105.937	65.8294	170.479	0	1.4214
Concept Drug	Magnesium oxide	17	4.19395	2.61565	6.7246	0	1.4214
Concept Drug	Hydrocortisone	17	3.4064	2.12454	5.46169	2e-05	1.4214
Concept Drug	Folic Acid	17	0.56582	0.35293	0.90712	0.01239	1.4214
Concept Drug	Itraconazole	15	13.9252	8.41722	23.0373	0	1.25418
Concept Drug	Antithymocyte globulin	15	13.4523	8.13154	22.2547	0	1.25418
Concept Drug	Famotidine	15	2.47336	1.4957	4.09005	0.0015	1.25418
Concept Drug	Calcium	14	0.35414	0.21038	0.59613	0	1.17057
Concept Drug	Amlodipine	14	0.48367	0.28733	0.81417	0.00332	1.17057
Concept Drug	Tacrolimus	14	1.91009	1.13464	3.2155	0.02324	1.17057
Concept Drug	Levofloxacin	14	1.77296	1.05319	2.98463	0.04543	1.17057
Concept Drug	Ondansetron	14	1.4222	0.84484	2.39413	0.19591	1.17057
Concept Drug	Zolpidem	14	1.07763	0.64016	1.81406	0.77892	1.17057
Concept Drug	Ceftazidime	13	21.592	12.5634	37.1086	0	1.08696
Concept Drug	Amphotericin B	13	9.46597	5.51059	16.2604	0	1.08696
Concept Drug	Diphenhydramine	13	1.20436	0.70135	2.06813	0.44419	1.08696
Concept Drug	Morphine	13	1.1771	0.68548	2.0213	0.54248	1.08696
Concept Drug	Potassium Chloride	13	1.17158	0.68227	2.01183	0.54369	1.08696
Concept Drug	Atorvastatin	12	0.37778	0.21515	0.66334	0.0001	1.00334
Concept Drug	Metoprolol	12	0.43102	0.24547	0.75682	0.00104	1.00334
Concept Drug	Vancomycin	12	2.84932	1.62256	5.00361	0.00137	1.00334
Concept Drug	Nicotinamide	12	0.69392	0.39519	1.21846	0.22597	1.00334
Concept Drug	Lansoprazole	12	1.01493	0.578	1.78215	0.88357	1.00334
Concept Drug	Cefepime	11	11.1564	6.19213	20.1006	0	0.91973
Concept Drug	Cholecalciferol	11	0.36097	0.20044	0.65005	7e-05	0.91973
Concept Drug	Everolimus	11	3.06979	1.70444	5.52887	0.0012	0.91973
Concept Drug	Metronidazole	11	2.49849	1.38727	4.49982	0.00562	0.91973
Concept Drug	Oxycodone	11	0.5193	0.28836	0.93518	0.02097	0.91973
Concept Drug	Heparin	11	1.93412	1.07393	3.48329	0.03403	0.91973
Concept Drug	Pyridoxine	11	0.68574	0.38078	1.23493	0.25589	0.91973
Concept Drug	Thiotepa	10	38.1612	20.5493	70.8673	0	0.83612
Concept Drug	Bleomycin	10	13.5023	7.27921	25.0457	0	0.83612
Concept Drug	Aprepitant	10	9.76281	5.26412	18.106	0	0.83612
Concept Drug	Granisetron	10	6.47971	3.4944	12.0154	1e-05	0.83612
Concept Drug	Gabapentin	10	0.46374	0.25016	0.85967	0.00868	0.83612
Concept Drug	Bevacizumab	10	1.15807	0.62468	2.14688	0.60553	0.83612
Concept Drug	Voriconazole	9	5.16137	2.69145	9.89795	9e-05	0.75251
Concept Drug	Hydrochlorothiazide	9	0.37821	0.19727	0.72511	0.00084	0.75251
Concept Drug	Warfarin	9	0.41663	0.21731	0.79879	0.00324	0.75251
Concept Drug	Bortezomib	9	1.7823	0.92955	3.41734	0.10947	0.75251
Concept Drug	Vitamin E	9	0.59868	0.31226	1.14782	0.15057	0.75251
Concept Drug	Thiamine	9	0.62023	0.3235	1.18914	0.18395	0.75251
Concept Drug	Atenolol	9	0.65526	0.34177	1.25631	0.27428	0.75251
Concept Drug	Sargramostim	8	24.7179	12.374	49.3759	0	0.6689
Concept Drug	Salbutamol	8	0.30885	0.15481	0.61617	6e-05	0.6689
Concept Drug	Lisinopril	8	0.30508	0.15292	0.60864	6e-05	0.6689
Concept Drug	Vitamin D	8	0.32493	0.16287	0.64825	0.00021	0.6689
Concept Drug	Cyanocobalamin	8	0.39757	0.19928	0.79317	0.0033	0.6689
Concept Drug	Pregabalin	8	0.41817	0.2096	0.83426	0.00748	0.6689
Concept Drug	Vitamin C	8	0.42724	0.21415	0.85236	0.00973	0.6689
Concept Drug	Hydrocodone	8	0.43974	0.22042	0.8773	0.01244	0.6689
Concept Drug	Riboflavin	8	0.58012	0.29078	1.15738	0.1347	0.6689
Concept Drug	Fentanyl	8	0.60639	0.30395	1.20979	0.16665	0.6689
Concept Drug	Glimepiride	8	1.37195	0.68764	2.73722	0.39896	0.6689
Concept Drug	Fexofenadine	8	1.18816	0.59553	2.37051	0.55943	0.6689
Concept Drug	Bisoprolol	8	1.03315	0.51784	2.06125	0.85599	0.6689
Concept Drug	Metoclopramide	8	0.98625	0.49433	1.96766	1	0.6689
Concept Drug	natural alpha interferon	7	23.1546	11.0482	48.5273	0	0.58528
Concept Drug	Caspofungin	7	12.3475	5.89513	25.8622	0	0.58528
Concept Drug	Pramocaine	7	12.1447	5.79838	25.4372	0	0.58528
Concept Drug	Simvastatin	7	0.25593	0.12227	0.5357	1e-05	0.58528
Concept Drug	Polycarbophil calcium	7	8.11764	3.87656	16.9986	3e-05	0.58528
Concept Drug	Ibuprofen	7	0.33931	0.16211	0.71021	0.00112	0.58528
Concept Drug	Ursodeoxycholic acid	7	3.34174	1.59626	6.99584	0.00574	0.58528
Concept Drug	Vitamin A	7	0.52079	0.24881	1.0901	0.09683	0.58528
Concept Drug	Hydromorphone	7	1.73677	0.82969	3.63556	0.13118	0.58528
Concept Drug	Gemcitabine	7	1.69272	0.80865	3.54335	0.14079	0.58528
Concept Drug	2-(4-(2-HYDROXY-3-(ISOPROPYLAMINO)PROPOXY)PHENYL)ETHANAMIDE	7	0.59654	0.285	1.24866	0.18707	0.58528
Concept Drug	Senna glycoside	7	1.45435	0.69478	3.04432	0.35145	0.58528
Concept Drug	Darbepoetin alfa	7	1.38401	0.66118	2.89707	0.36535	0.58528
Concept Drug	Mycophenolate mofetil	7	1.2674	0.60548	2.65297	0.51585	0.58528
Concept Drug	Levosalbutamol	7	0.81145	0.38767	1.69852	0.73198	0.58528
Concept Drug	Magnesium	7	0.97469	0.46565	2.04021	1	0.58528
Concept Drug	Amifostine	6	54.329	24.3769	121.084	0	0.50167
Concept Drug	Fluticasone Propionate	6	0.2567	0.11555	0.57026	4e-05	0.50167
Concept Drug	Entecavir	6	8.12118	3.65403	18.0496	0.00012	0.50167
Concept Drug	Mesna	6	7.76582	3.49421	17.2594	0.00015	0.50167
Concept Drug	Esomeprazole	6	0.29874	0.13448	0.66365	0.00042	0.50167
Concept Drug	Sirolimus	6	4.52076	2.0345	10.0453	0.00245	0.50167
Concept Drug	Colchicine	6	4.03719	1.81693	8.97056	0.00424	0.50167
Concept Drug	Niacin	6	0.38048	0.17127	0.84524	0.01037	0.50167
Concept Drug	Piperacillin	6	2.85044	1.28293	6.33318	0.02056	0.50167
Concept Drug	Tramadol	6	0.44968	0.20242	0.99896	0.03829	0.50167
Concept Drug	Pseudoephedrine	6	1.63407	0.73552	3.63036	0.19092	0.50167
Concept Drug	Budesonide	6	0.56997	0.25657	1.26621	0.21204	0.50167
Concept Drug	Ranitidine	6	0.5675	0.25546	1.26072	0.21265	0.50167
Concept Drug	Phenytoin	6	1.4062	0.63296	3.12406	0.33115	0.50167
Concept Drug	Spironolactone	6	0.6775	0.30497	1.50509	0.49575	0.50167
Concept Drug	Codeine	6	1.21829	0.54838	2.70656	0.50142	0.50167
Concept Drug	Cetirizine	6	0.7134	0.32113	1.58484	0.60004	0.50167
Concept Drug	Fluoride ion	6	0.80495	0.36234	1.78823	0.85265	0.50167
Concept Drug	Ipratropium bromide	6	0.90109	0.40561	2.00183	1	0.50167
Concept Drug	Docusate	6	0.86605	0.38984	1.92398	1	0.50167
Concept Drug	Palifermin	5	105.305	43.608	254.294	0	0.41806
Concept Drug	Lomustine	5	43.4419	18.0629	104.48	0	0.41806
Concept Drug	Metformin	5	0.1419	0.05917	0.34031	0	0.41806
Concept Drug	Famciclovir	5	14.6851	6.11756	35.2515	3e-05	0.41806
Concept Drug	Clemastine	5	13.5491	5.64472	32.522	4e-05	0.41806
Concept Drug	Procarbazine	5	13.3	5.54103	31.9235	5e-05	0.41806
Concept Drug	Alprazolam	5	0.29593	0.1234	0.7097	0.0013	0.41806
Concept Drug	Vinorelbine	5	5.08427	2.11935	12.197	0.0034	0.41806
Concept Drug	Ergocalciferol	5	0.32571	0.13581	0.78112	0.00429	0.41806
Concept Drug	Valsartan	5	0.34738	0.14485	0.8331	0.00758	0.41806
Concept Drug	Quetiapine	5	0.36558	0.15244	0.87675	0.0135	0.41806
Concept Drug	Epirubicin	5	3.18314	1.32704	7.6353	0.02204	0.41806
Concept Drug	Sertraline	5	0.38605	0.16097	0.92584	0.02385	0.41806
Concept Drug	Losartan	5	0.39806	0.16598	0.95465	0.03147	0.41806
Concept Drug	Domperidone	5	2.72312	1.1353	6.53167	0.03897	0.41806
Concept Drug	Tazobactam	5	2.40194	1.00142	5.76117	0.06019	0.41806
Concept Drug	Fluoxetine	5	0.48985	0.20425	1.17478	0.11438	0.41806
Concept Drug	Epoetin alfa	5	1.34952	0.56268	3.23667	0.42902	0.41806
Concept Drug	Guaifenesin	5	1.31825	0.54964	3.16165	0.43832	0.41806
Concept Drug	Oxaliplatin	5	1.14699	0.47824	2.75089	0.63062	0.41806
Concept Drug	Candesartan	5	1.12878	0.47065	2.70721	0.63575	0.41806
Concept Drug	Nifedipine	5	1.07236	0.44713	2.57189	0.81378	0.41806
Concept Drug	Ardeparin	5	0.82942	0.34584	1.98921	0.83897	0.41806
Concept Drug	Amiodarone	5	0.91266	0.38054	2.18884	1	0.41806
Concept Drug	Glipizide	5	0.87436	0.36458	2.09699	1	0.41806
Concept Drug	Pirarubicin	4	53.5638	20.0569	143.047	0	0.33445
Concept Drug	Vindesine	4	31.1724	11.6917	83.112	1e-05	0.33445
Concept Drug	Lenalidomide	4	0.19986	0.07513	0.53166	4e-05	0.33445
Concept Drug	Nadroparin	4	18.9206	7.10284	50.4006	7e-05	0.33445
Concept Drug	Ganciclovir	4	6.74467	2.53425	17.9504	0.00322	0.33445
Concept Drug	Brotizolam	4	4.91529	1.84712	13.0799	0.0096	0.33445
Concept Drug	Valganciclovir	4	4.78541	1.79833	12.7341	0.01051	0.33445
Concept Drug	Aliskiren	4	2.83265	1.06465	7.53667	0.05502	0.33445
Concept Drug	Ramipril	4	0.39945	0.15016	1.0626	0.05529	0.33445
Concept Drug	Bromazepam	4	2.76613	1.03965	7.35965	0.05898	0.33445
Concept Drug	Potassium	4	0.43534	0.16365	1.15807	0.09552	0.33445
Concept Drug	Diazepam	4	0.43115	0.16208	1.14695	0.09614	0.33445
Concept Drug	Loratadine	4	0.4629	0.17401	1.23139	0.12416	0.33445
Concept Drug	Sodium bicarbonate	4	1.91948	0.72148	5.1067	0.15822	0.33445
Concept Drug	Digoxin	4	0.50225	0.1888	1.33608	0.20952	0.33445
Concept Drug	Amoxicillin	4	0.50035	0.18809	1.33103	0.20994	0.33445
Concept Drug	Omega-3-carboxylic acids	4	0.53177	0.1999	1.4146	0.2686	0.33445
Concept Drug	Polyethylene glycol	4	0.57614	0.21658	1.53265	0.34059	0.33445
Concept Drug	Lactulose	4	1.43588	0.53973	3.81997	0.36633	0.33445
Concept Drug	Nitroglycerin	4	0.66603	0.25037	1.77179	0.54005	0.33445
Concept Drug	Hydroxychloroquine	4	0.63488	0.23866	1.68892	0.54413	0.33445
Concept Drug	Ethanol	4	1.25294	0.47097	3.33324	0.56766	0.33445
Concept Drug	Calcium carbonate	4	0.71584	0.26909	1.90429	0.67107	0.33445
Concept Drug	Enalapril	4	0.6809	0.25596	1.81135	0.67503	0.33445
Concept Drug	Isosorbide Mononitrate	4	0.94539	0.35537	2.515	1	0.33445
Concept Drug	Glibenclamide	4	0.85822	0.32261	2.28309	1	0.33445
Concept Drug	Tositumomab	3	69.5677	22.3362	216.674	1e-05	0.25084
Concept Drug	Pindolol	3	30.4823	9.81949	94.6253	0.00015	0.25084
Concept Drug	Rosiglitazone	3	0.19272	0.06224	0.59671	0.00028	0.25084
Concept Drug	Lenograstim	3	22.7921	7.34699	70.7067	0.00035	0.25084
Concept Drug	Gadolinium	3	17.0067	5.48478	52.7331	0.0008	0.25084
Concept Drug	Rosuvastatin	3	0.21529	0.06953	0.6666	0.00102	0.25084
Concept Drug	Clonazepam	3	0.21963	0.07093	0.68004	0.00145	0.25084
Concept Drug	Pentamidine	3	9.41345	3.03786	29.1696	0.00426	0.25084
Concept Drug	Ofatumumab	3	8.40316	2.71206	26.0368	0.00582	0.25084
Concept Drug	Venlafaxine	3	0.27589	0.0891	0.85423	0.0092	0.25084
Concept Drug	Teicoplanin	3	6.80038	2.19507	21.0678	0.01032	0.25084
Concept Drug	Paroxetine	3	0.27922	0.09018	0.86456	0.01287	0.25084
Concept Drug	Voglibose	3	6.12639	1.97763	18.9786	0.01361	0.25084
Concept Drug	Carvedilol	3	0.29003	0.09367	0.89801	0.0175	0.25084
Concept Drug	Flunitrazepam	3	5.01656	1.61952	15.5391	0.02291	0.25084
Concept Drug	Alendronate	3	0.30134	0.09732	0.93303	0.0238	0.25084
Concept Drug	Pravastatin	3	0.38157	0.12323	1.18146	0.10275	0.25084
Concept Drug	Megestrol	3	2.60176	0.84011	8.05744	0.11046	0.25084
Concept Drug	Sitagliptin	3	0.41103	0.13275	1.2727	0.13426	0.25084
Concept Drug	Estradiol	3	0.40549	0.13096	1.25553	0.13543	0.25084
Concept Drug	Phenylephrine	3	0.53275	0.17206	1.6496	0.39314	0.25084
Concept Drug	Meloxicam	3	0.60411	0.1951	1.87057	0.50177	0.25084
Concept Drug	Oxcarbazepine	3	1.24616	0.40243	3.8588	0.52217	0.25084
Concept Drug	Mometasone	3	0.63626	0.20548	1.97012	0.64084	0.25084
Concept Drug	Citric Acid	3	1.20822	0.39018	3.74133	0.74242	0.25084
Concept Drug	Ceftriaxone	3	1.06553	0.34411	3.29943	0.76255	0.25084
Concept Drug	Perindopril	3	1.05183	0.33968	3.25702	0.7651	0.25084
Concept Drug	Mycophenolic acid	3	0.97248	0.31406	3.01126	1	0.25084
Concept Drug	Clarithromycin	3	0.93508	0.30198	2.89547	1	0.25084
Concept Drug	Prednimustine	2	2662.12	516.98	13708.2	0	0.16722
Concept Drug	motexafin gadolinium	2	1331.06	291.949	6068.6	0	0.16722
Concept Drug	Clopidogrel	2	0.11842	0.02965	0.47295	1e-05	0.16722
Concept Drug	Fludeoxyglucose F-18	2	302.514	73.4191	1246.47	2e-05	0.16722
Concept Drug	Insulin Glargine	2	0.1348	0.03375	0.53839	7e-05	0.16722
Concept Drug	Tiotropium	2	0.13974	0.03499	0.55813	0.00015	0.16722
Concept Drug	Duloxetine	2	0.13961	0.03496	0.55761	0.00015	0.16722
Concept Drug	Glucose	2	0.18088	0.04529	0.72242	0.00216	0.16722
Concept Drug	Dexchlorpheniramine maleate	2	27.3881	6.83795	109.698	0.00255	0.16722
Concept Drug	Sildenafil	2	0.19704	0.04933	0.78697	0.00418	0.16722
Concept Drug	Alizapride	2	17.8426	4.45917	71.3944	0.00585	0.16722
Concept Drug	Nefopam	2	15.4775	3.86903	61.9152	0.00768	0.16722
Concept Drug	Interferon Alfa-2a, Recombinant	2	13.5823	3.39594	54.3231	0.00985	0.16722
Concept Drug	Iron	2	0.22998	0.05758	0.91853	0.01571	0.16722
Concept Drug	Mechlorethamine	2	10.0533	2.51453	40.1941	0.01737	0.16722
Concept Drug	Aripiprazole	2	0.24538	0.06144	0.98007	0.02146	0.16722
Concept Drug	Co-Methylcobalamin	2	7.48208	1.87191	29.906	0.02998	0.16722
Concept Drug	Nizatidine	2	7.24979	1.81384	28.9769	0.03175	0.16722
Concept Drug	Potassium Iodide	2	6.67533	1.67022	26.6792	0.03688	0.16722
Concept Drug	Selenium Sulfide	2	6.46774	1.61831	25.849	0.03903	0.16722
Concept Drug	Diltiazem	2	0.26825	0.06716	1.07138	0.04096	0.16722
Concept Drug	Trazodone	2	0.26124	0.06541	1.04339	0.04233	0.16722
Concept Drug	Sodium iodide	2	4.94084	1.23646	19.7434	0.06287	0.16722
Concept Drug	Scopolamine butylbromide	2	4.71172	1.17915	18.8274	0.06826	0.16722
Concept Drug	Posaconazole	2	4.09809	1.02565	16.3744	0.08662	0.16722
Concept Drug	Trolamine salicylate	2	3.78035	0.94616	15.1043	0.09916	0.16722
Concept Drug	Pioglitazone	2	0.31957	0.08001	1.27636	0.10469	0.16722
Concept Drug	Paclitaxel	2	0.31565	0.07903	1.26071	0.10571	0.16722
Concept Drug	Dronabinol	2	3.50926	0.87833	14.0208	0.11213	0.16722
Concept Drug	Atovaquone	2	3.40425	0.85206	13.6011	0.11783	0.16722
Concept Drug	Clorazepate	2	3.0571	0.7652	12.2137	0.14008	0.16722
Concept Drug	Calcium Acetate	2	2.79224	0.69892	11.1552	0.16151	0.16722
Concept Drug	Aztreonam	2	2.63472	0.6595	10.5257	0.17662	0.16722
Concept Drug	Fenofibrate	2	0.37839	0.09474	1.51131	0.1899	0.16722
Concept Drug	Insulin Aspart	2	0.36528	0.09146	1.45897	0.19244	0.16722
Concept Drug	Carbamazepine	2	0.35779	0.08958	1.42904	0.19537	0.16722
Concept Drug	Fluvastatin	2	2.45402	0.61428	9.80364	0.19664	0.16722
Concept Drug	Olopatadine	2	2.33683	0.58496	9.33537	0.21145	0.16722
Concept Drug	Olmesartan	2	0.40819	0.1022	1.63034	0.25546	0.16722
Concept Drug	Magnesium Sulfate	2	1.94657	0.48728	7.77598	0.2744	0.16722
Concept Drug	Repaglinide	2	1.75209	0.43861	6.99895	0.31621	0.16722
Concept Drug	Scopolamine	2	1.74909	0.43786	6.98699	0.31692	0.16722
Concept Drug	Menthol	2	1.70758	0.42747	6.82114	0.32704	0.16722
Concept Drug	Pyridoxal Phosphate	2	1.69217	0.42361	6.75956	0.33091	0.16722
Concept Drug	Hydroxyzine	2	0.45872	0.11485	1.83216	0.34046	0.16722
Concept Drug	Azithromycin	2	0.44021	0.11022	1.75824	0.34237	0.16722
Concept Drug	Pamidronate	2	1.57971	0.39546	6.31024	0.3612	0.16722
Concept Drug	Succinic acid	2	1.55172	0.38846	6.19841	0.36934	0.16722
Concept Drug	Erythromycin	2	1.45535	0.36434	5.81341	0.39936	0.16722
Concept Drug	Prochlorperazine	2	0.55861	0.13986	2.23117	0.59548	0.16722
Concept Drug	Rabeprazole	2	0.53735	0.13453	2.14623	0.59819	0.16722
Concept Drug	Methadone	2	0.51632	0.12927	2.06223	0.60315	0.16722
Concept Drug	Isoniazid	2	1.2933	0.32377	5.166	0.6705	0.16722
Concept Drug	Temozolomide	2	1.22837	0.30752	4.90662	0.68033	0.16722
Concept Drug	Ibrutinib	2	1.10618	0.27693	4.41847	0.70348	0.16722
Concept Drug	Nystatin	2	1.06272	0.26606	4.24489	0.71337	0.16722
Concept Drug	Triamterene	2	0.66467	0.16641	2.6548	0.77566	0.16722
Concept Drug	Latanoprost	2	0.64863	0.16239	2.59076	0.77592	0.16722
Concept Drug	Doxycycline	2	0.60341	0.15107	2.41011	0.7791	0.16722
Concept Drug	Thyroid extract	2	0.98299	0.2461	3.92636	1	0.16722
Concept Drug	Buspirone	2	0.93803	0.23484	3.74676	1	0.16722
Concept Drug	Timolol	2	0.8463	0.21188	3.38034	1	0.16722
Concept Drug	Clindamycin	2	0.76252	0.19091	3.04569	1	0.16722
Concept Drug	Glucosamine	2	0.73596	0.18426	2.93959	1	0.16722
Concept Drug	Cefuroxime	2	0.68333	0.17108	2.72936	1	0.16722
Concept Drug	Risedronate	2	0.67365	0.16866	2.69068	1	0.16722
Concept Drug	Levonorgestrel	1	0.05196	0.00732	0.36856	0	0.08361
Concept Drug	Adalimumab	1	0.01874	0.00264	0.13295	0	0.08361
Concept Drug	Etanercept	1	0.01717	0.00242	0.12178	0	0.08361
Concept Drug	Naproxen	1	0.06673	0.00941	0.47335	1e-05	0.08361
Concept Drug	Ethinyl Estradiol	1	0.06596	0.0093	0.46787	1e-05	0.08361
Concept Drug	Ribavirin	1	0.07188	0.01013	0.50991	3e-05	0.08361
Concept Drug	Salmeterol	1	0.07439	0.01049	0.52769	4e-05	0.08361
Concept Drug	Citalopram	1	0.08566	0.01208	0.60764	0.00018	0.08361
Concept Drug	Tricyclazole	1	6655.31	416.502	106346	0.0003	0.08361
Concept Drug	Insulin Lispro	1	0.09697	0.01367	0.68788	0.00078	0.08361
Concept Drug	Valproic Acid	1	0.09663	0.01362	0.68547	0.00079	0.08361
Concept Drug	Norflurane	1	1331.06	155.619	11385	0.0009	0.08361
Concept Drug	1,3-Dihydroxyacetonephosphate	1	1109.22	133.637	9206.76	0.00105	0.08361
Concept Drug	Lamotrigine	1	0.10032	0.01414	0.71162	0.00113	0.08361
Concept Drug	Indium In-111 chloride	1	950.758	117.061	7721.94	0.0012	0.08361
Concept Drug	L-D-(a-Aminoadipoyl)-L-Cysteinyl-D-Valine	1	831.913	104.127	6646.52	0.00135	0.08361
Concept Drug	Montelukast	1	0.10478	0.01477	0.74329	0.00159	0.08361
Concept Drug	Benznidazole	1	554.609	72.1695	4262.06	0.00195	0.08361
Concept Drug	Zoledronate	1	0.10808	0.01524	0.76665	0.00234	0.08361
Concept Drug	Conjugated Estrogens	1	0.11377	0.01604	0.80705	0.00325	0.08361
Concept Drug	Pixantrone	1	214.687	29.3305	1571.42	0.0048	0.08361
Concept Drug	Pivampicillin	1	190.152	26.0711	1386.89	0.00539	0.08361
Concept Drug	Indium In-111	1	184.87	25.3664	1347.33	0.00554	0.08361
Concept Drug	Tamsulosin	1	0.12654	0.01784	0.8976	0.00641	0.08361
Concept Drug	Formoterol	1	0.1243	0.01752	0.88176	0.00663	0.08361
Concept Drug	R115777	1	125.572	17.3794	907.297	0.00808	0.08361
Concept Drug	Amitriptyline	1	0.13276	0.01872	0.94174	0.00914	0.08361
Concept Drug	Baclofen	1	0.13188	0.01859	0.93553	0.00923	0.08361
Concept Drug	Olanzapine	1	0.13086	0.01845	0.9283	0.00938	0.08361
Concept Drug	Floctafenine	1	81.1623	11.3062	582.629	0.01239	0.08361
Concept Drug	Levetiracetam	1	0.14355	0.02024	1.01828	0.01274	0.08361
Concept Drug	Ezetimibe	1	0.14189	0.02	1.00649	0.01279	0.08361
Concept Drug	Phosphocholine	1	77.3873	10.7863	555.223	0.01299	0.08361
Concept Drug	Rutin	1	53.6718	7.50686	383.738	0.01861	0.08361
Concept Drug	Capecitabine	1	0.16151	0.02277	1.14567	0.02553	0.08361
Concept Drug	Pralatrexate	1	25.2095	3.54072	179.488	0.03903	0.08361
Concept Drug	Gabexate	1	22.9493	3.22435	163.342	0.04278	0.08361
Concept Drug	Mirtazapine	1	0.17717	0.02498	1.25677	0.05255	0.08361
Concept Drug	Undecylenate	1	17.9388	2.52224	127.586	0.05436	0.08361
Concept Drug	Benzbromarone	1	17.8906	2.51548	127.242	0.0545	0.08361
Concept Drug	Potassium phosphate, monobasic	1	15.6595	2.2025	111.338	0.062	0.08361
Concept Drug	Potassium phosphate, dibasic	1	15.6228	2.19735	111.076	0.06214	0.08361
Concept Drug	Mesalazine	1	0.19411	0.02736	1.37693	0.07265	0.08361
Concept Drug	Carbazochrome	1	12.2792	1.72791	87.26	0.07835	0.08361
Concept Drug	Sulfur	1	11.5144	1.62048	81.8159	0.08332	0.08361
Concept Drug	Benidipine	1	10.1919	1.43464	72.4049	0.09359	0.08361
Concept Drug	human rho(d) immune globulin	1	9.63141	1.35585	68.4175	0.09875	0.08361
Concept Drug	SOFOSBUVIR	1	0.21665	0.03054	1.53687	0.10075	0.08361
Concept Drug	Propranolol	1	0.21629	0.03049	1.53432	0.10079	0.08361
Concept Drug	Clonidine	1	0.21403	0.03017	1.51828	0.10114	0.08361
Concept Drug	Epinephrine	1	0.20782	0.0293	1.47424	0.10306	0.08361
Concept Drug	Sodium Iodide I-131	1	9.03027	1.27134	64.1415	0.10496	0.08361
Concept Drug	Lamivudine	1	0.20251	0.02855	1.43655	0.10596	0.08361
Concept Drug	Ammonium chloride	1	8.67706	1.22168	61.6295	0.10898	0.08361
Concept Drug	Molsidomine	1	8.21643	1.1569	58.3539	0.11472	0.08361
Concept Drug	Phenylpropanolamine	1	7.23403	1.01872	51.3693	0.12924	0.08361
Concept Drug	Potassium gluconate	1	6.66864	0.93918	47.3506	0.13938	0.08361
Concept Drug	Loperamide	1	0.22813	0.03216	1.61831	0.14375	0.08361
Concept Drug	Docetaxel	1	0.22392	0.03157	1.58842	0.14587	0.08361
Concept Drug	Fluorometholone	1	5.85854	0.82519	41.5935	0.15704	0.08361
Concept Drug	Vasopressin	1	5.71762	0.80536	40.5921	0.16058	0.08361
Concept Drug	Sodium ferric gluconate complex	1	5.53226	0.77927	39.2751	0.16549	0.08361
Concept Drug	Ethyl loflazepate	1	5.52766	0.77862	39.2425	0.16561	0.08361
Concept Drug	molecular iodine	1	5.16315	0.72732	36.6527	0.1762	0.08361
Concept Drug	Cefpodoxime	1	4.58354	0.64572	32.5354	0.19614	0.08361
Concept Drug	Eculizumab	1	0.26395	0.03721	1.87242	0.19744	0.08361
Concept Drug	Leucovorin	1	0.26243	0.03699	1.86164	0.19762	0.08361
Concept Drug	Thalidomide	1	0.25955	0.03659	1.84117	0.19814	0.08361
Concept Drug	Intravenous Immunoglobulin	1	0.25821	0.0364	1.83167	0.19845	0.08361
Concept Drug	(3R)-N-methyl-3-phenyl-3-[4-(trifluoromethyl)phenoxy]propan-1-amine	1	0.25193	0.03551	1.78715	0.20059	0.08361
Concept Drug	(3S)-N-methyl-3-phenyl-3-[4-(trifluoromethyl)phenoxy]propan-1-amine	1	0.25193	0.03551	1.78715	0.20059	0.08361
Concept Drug	Dolasetron	1	4.40749	0.62094	31.2849	0.20311	0.08361
Concept Drug	Levodopa	1	0.24411	0.03441	1.73163	0.20496	0.08361
Concept Drug	methyl cellulose	1	4.07052	0.57349	28.8916	0.21794	0.08361
Concept Drug	Sodium Citrate	1	3.65475	0.51495	25.939	0.2395	0.08361
Concept Drug	Obinutuzumab	1	3.45371	0.48664	24.5114	0.25152	0.08361
Concept Drug	Trichlormethiazide	1	3.17524	0.44742	22.5341	0.27029	0.08361
Concept Drug	Suprofen	1	3.09837	0.43659	21.9884	0.27597	0.08361
Concept Drug	Lithium	1	0.29071	0.04098	2.06227	0.2762	0.08361
Concept Drug	Carbidopa	1	0.28586	0.0403	2.02781	0.27751	0.08361
Concept Drug	Oxybutynin	1	0.26912	0.03794	1.90907	0.28622	0.08361
Concept Drug	Eribulin	1	2.96582	0.41792	21.0473	0.28634	0.08361
Concept Drug	Pheniramine	1	2.87114	0.40458	20.3751	0.29423	0.08361
Concept Drug	Enfuvirtide	1	2.74672	0.38706	19.4918	0.30528	0.08361
Concept Drug	Skeletal targeted radiotherapy	1	2.73431	0.38531	19.4037	0.30643	0.08361
Concept Drug	Pilocarpine	1	2.68793	0.37878	19.0744	0.31079	0.08361
Concept Drug	Cilastatin	1	2.33601	0.3292	16.5763	0.34837	0.08361
Concept Drug	Polyvinyl alcohol	1	2.33356	0.32886	16.5588	0.34866	0.08361
Concept Drug	Betahistine	1	2.29414	0.3233	16.279	0.35344	0.08361
Concept Drug	N-[(2r)-2,4-Dihydroxy-3,3-Dimethylbutanoyl]-Beta-Alanine	1	2.16785	0.30551	15.3826	0.36966	0.08361
Concept Drug	Tetracycline	1	2.16503	0.30512	15.3626	0.37004	0.08361
Concept Drug	Almitrine	1	2.15661	0.30393	15.3028	0.37117	0.08361
Concept Drug	Sodium fluoride	1	2.09286	0.29495	14.8503	0.37999	0.08361
Concept Drug	Moxifloxacin	1	0.33547	0.04729	2.37975	0.38293	0.08361
Concept Drug	Zopiclone	1	0.32885	0.04636	2.33283	0.38415	0.08361
Concept Drug	Doxazosin	1	0.32654	0.04603	2.31646	0.38472	0.08361
Concept Drug	Trastuzumab	1	0.32097	0.04525	2.27691	0.38643	0.08361
Concept Drug	Micafungin	1	2.02782	0.28578	14.3887	0.38943	0.08361
Concept Drug	Peginterferon alfa-2b	1	0.31197	0.04398	2.21308	0.39023	0.08361
Concept Drug	Interferon Alfa-2b, Recombinant	1	1.98785	0.28015	14.1049	0.39545	0.08361
Concept Drug	Penicillin V	1	1.97019	0.27767	13.9796	0.39817	0.08361
Concept Drug	Alprostadil	1	1.95113	0.27498	13.8443	0.40115	0.08361
Concept Drug	Selenium	1	1.94827	0.27458	13.8241	0.4016	0.08361
Concept Drug	Gatifloxacin	1	1.88109	0.26511	13.3473	0.41247	0.08361
Concept Drug	D-Glucose in Linear Form	1	1.82939	0.25783	12.9803	0.42124	0.08361
Concept Drug	Topotecan	1	1.81492	0.25579	12.8776	0.42376	0.08361
Concept Drug	Benzodiazepine	1	1.75927	0.24795	12.4826	0.43372	0.08361
Concept Drug	Rebamipide	1	1.75001	0.24664	12.4169	0.43542	0.08361
Concept Drug	Regorafenib	1	1.7043	0.2402	12.0925	0.44401	0.08361
Concept Drug	Sodium phosphate	1	1.66258	0.23432	11.7964	0.45214	0.08361
Concept Drug	Imipenem	1	1.62761	0.2294	11.5482	0.45917	0.08361
Concept Drug	Daclatasvir	1	1.54308	0.21748	10.9483	0.47708	0.08361
Concept Drug	Protriptyline	1	1.50334	0.21189	10.6663	0.48597	0.08361
Concept Drug	Zinc oxide	1	1.48258	0.20896	10.519	0.49074	0.08361
Concept Drug	Imipramine	1	1.47994	0.20859	10.5003	0.49135	0.08361
Concept Drug	Calcium Citrate	1	1.47437	0.2078	10.4607	0.49265	0.08361
Concept Drug	Pramipexole	1	0.39542	0.05574	2.80508	0.52957	0.08361
Concept Drug	Eszopiclone	1	0.3866	0.0545	2.7425	0.5306	0.08361
Concept Drug	Atropine	1	0.38348	0.05406	2.72038	0.53111	0.08361
Concept Drug	Lovastatin	1	0.36798	0.05187	2.61042	0.53481	0.08361
Concept Drug	Ropinirole	1	0.36358	0.05125	2.57919	0.53625	0.08361
Concept Drug	Donepezil	1	0.3619	0.05102	2.56726	0.53685	0.08361
Concept Drug	Solifenacin	1	0.35932	0.05065	2.54897	0.53782	0.08361
Concept Drug	Didanosine	1	1.25006	0.17619	8.86893	0.55082	0.08361
Concept Drug	Amikacin	1	1.23064	0.17346	8.73115	0.55645	0.08361
Concept Drug	Palonosetron	1	1.19463	0.16838	8.47564	0.56719	0.08361
Concept Drug	Ketoprofen	1	1.19335	0.1682	8.46652	0.56758	0.08361
Concept Drug	Fulvestrant	1	1.16842	0.16469	8.28961	0.57525	0.08361
Concept Drug	Acetylcysteine	1	1.14747	0.16174	8.14094	0.58184	0.08361
Concept Drug	Meperidine	1	1.1059	0.15588	7.84599	0.59532	0.08361
Concept Drug	Daptomycin	1	1.08871	0.15346	7.72404	0.60106	0.08361
Concept Drug	Nabumetone	1	1.07831	0.15199	7.65019	0.60459	0.08361
Concept Drug	Acenocoumarol	1	1.0705	0.15089	7.59481	0.60725	0.08361
Concept Drug	Chlorpromazine	1	1.0681	0.15055	7.57774	0.60808	0.08361
Concept Drug	Chlorthalidone	1	1.04038	0.14664	7.38107	0.61774	0.08361
Concept Drug	Daunorubicin	1	1.01966	0.14372	7.23404	0.62514	0.08361
Concept Drug	Penicillin G	1	1.00215	0.14126	7.10984	0.63151	0.08361
Concept Drug	Valdecoxib	1	0.49969	0.07044	3.54478	0.72908	0.08361
Concept Drug	Isosorbide Dinitrate	1	0.48195	0.06794	3.41899	0.72945	0.08361
Concept Drug	Raloxifene	1	0.47248	0.0666	3.35175	0.72997	0.08361
Concept Drug	Carisoprodol	1	0.46157	0.06506	3.27434	0.73086	0.08361
Concept Drug	Gliclazide	1	0.45817	0.06458	3.25022	0.73121	0.08361
Concept Drug	Betamethasone	1	0.45413	0.06402	3.22161	0.73166	0.08361
Concept Drug	Propoxyphene	1	0.45099	0.06357	3.19934	0.73205	0.08361
Concept Drug	Anastrozole	1	0.40905	0.05766	2.9018	0.74054	0.08361
Concept Drug	Zinc	1	0.95622	0.13478	6.78393	1	0.08361
Concept Drug	Manganese	1	0.90994	0.12826	6.45554	1	0.08361
Concept Drug	Flecainide	1	0.90833	0.12803	6.44408	1	0.08361
Concept Drug	Alemtuzumab	1	0.90783	0.12796	6.44057	1	0.08361
Concept Drug	Chloroquine	1	0.89985	0.12684	6.38396	1	0.08361
Concept Drug	Doxepin	1	0.87905	0.12391	6.23637	1	0.08361
Concept Drug	Povidone-iodine	1	0.86075	0.12133	6.1065	1	0.08361
Concept Drug	Amantadine	1	0.84255	0.11876	5.97738	1	0.08361
Concept Drug	Alfacalcidol	1	0.83389	0.11754	5.91596	1	0.08361
Concept Drug	Captopril	1	0.83243	0.11734	5.9056	1	0.08361
Concept Drug	Pancrelipase lipase	1	0.8148	0.11485	5.7805	1	0.08361
Concept Drug	Romiplostim	1	0.81024	0.11421	5.74813	1	0.08361
Concept Drug	Azacitidine	1	0.76122	0.1073	5.40029	1	0.08361
Concept Drug	Dextrothyroxine	1	0.73434	0.10351	5.2096	1	0.08361
Concept Drug	Pancrelipase	1	0.72387	0.10204	5.13536	1	0.08361
Concept Drug	Linezolid	1	0.72238	0.10183	5.12477	1	0.08361
Concept Drug	Hyoscyamine	1	0.69674	0.09821	4.94287	1	0.08361
Concept Drug	Terazosin	1	0.66894	0.09429	4.74562	1	0.08361
Concept Drug	Exemestane	1	0.65979	0.093	4.68069	1	0.08361
Concept Drug	Dicyclomine	1	0.65473	0.09229	4.64476	1	0.08361
Concept Drug	Capsaicin	1	0.64036	0.09027	4.54286	1	0.08361
Concept Drug	Dexpanthenol	1	0.63572	0.08961	4.50988	1	0.08361
Concept Drug	Sucralfate	1	0.63493	0.0895	4.50428	1	0.08361
Concept Drug	Sotalol	1	0.62869	0.08862	4.46003	1	0.08361
Concept Drug	Bumetanide	1	0.62421	0.08799	4.42823	1	0.08361
Concept Drug	Tamoxifen	1	0.61441	0.08661	4.35873	1	0.08361
Concept Drug	Sacubitril	1	0.60224	0.08489	4.27234	1	0.08361
Concept Drug	Misoprostol	1	0.57792	0.08146	4.09982	1	0.08361
Concept Drug	Paricalcitol	1	0.57527	0.08109	4.08103	1	0.08361
Concept Drug	Lapatinib	1	0.53302	0.07514	3.78129	1	0.08361
Concept Drug	Dutasteride	1	0.53026	0.07475	3.76171	1	0.08361
Concept Drug	Beclomethasone	1	0.51536	0.07265	3.65596	1	0.08361
Concept Drug	Sevelamer	1	0.51353	0.07239	3.64298	1	0.08361
Concept Drug	Abacavir	1	0.50684	0.07145	3.59554	1	0.08361
Indication	NON-HODGKIN'S LYMPHOMA	513	350.207	327.075	374.976	0	42.893
Indication	B-CELL LYMPHOMA	262	246.075	220.551	274.554	0	21.9063
Indication	STEM CELL TRANSPLANT	118	153.835	129.334	182.977	0	9.86622
Indication	LYMPHOMA	80	74.905	60.5379	92.6817	0	6.68896
Indication	MANTLE CELL LYMPHOMA	69	89.6731	71.1999	112.939	0	5.76923
Indication	PRODUCT USED FOR UNKNOWN INDICATION	66	0.30485	0.24112	0.38542	0	5.51839
Indication	DIFFUSE LARGE B-CELL LYMPHOMA	63	52.5485	41.2806	66.892	0	5.26756
Indication	DRUG USE FOR UNKNOWN INDICATION	47	1.4148	1.06901	1.87243	0.02155	3.92977
Indication	FOLLICLE CENTRE LYMPHOMA, FOLLICULAR GRADE I, II, III	33	2678.35	1795.25	3995.88	0	2.7592
Indication	BONE MARROW CONDITIONING REGIMEN	32	49.4359	35.0775	69.6716	0	2.67559
Indication	PROPHYLAXIS	26	2.06162	1.40952	3.01542	0.00088	2.17391
Indication	PREMEDICATION	19	5.44249	3.48331	8.50361	0	1.58863
Indication	NON-HODGKIN'S LYMPHOMA RECURRENT	17	1010.18	608.422	1677.23	0	1.4214
Indication	PROPHYLAXIS AGAINST GRAFT VERSUS HOST DISEASE	16	16.6201	10.2092	27.0568	0	1.33779
Indication	MULTIPLE MYELOMA	16	2.73361	1.68003	4.44791	0.00038	1.33779
Indication	FOLLICLE CENTRE LYMPHOMA, FOLLICULAR GRADE I, II, III STAGE III	14	11646.8	4894.95	27711.7	0	1.17057
Indication	FOLLICLE CENTRE LYMPHOMA, FOLLICULAR GRADE I, II, III STAGE IV	14	3005.62	1603.05	5635.37	0	1.17057
Indication	NON-HODGKIN'S LYMPHOMA STAGE IV	13	686.659	389.045	1211.94	0	1.08696
Indication	B-CELL LYMPHOMA RECURRENT	12	1064.85	580.472	1953.42	0	1.00334
Indication	INFECTION PROPHYLAXIS	10	7.57576	4.08528	14.0485	0	0.83612
Indication	HYPERTENSION	10	0.24795	0.13376	0.45965	0	0.83612
Indication	PALLIATIVE CARE	9	149.744	77.5345	289.205	0	0.75251
Indication	CENTRAL NERVOUS SYSTEM LYMPHOMA	9	81.0524	42.1083	156.014	0	0.75251
Indication	CONSTIPATION	9	1.69596	0.88452	3.25177	0.12053	0.75251
Indication	INSOMNIA	9	1.00326	0.52327	1.92356	0.86742	0.75251
Indication	MANTLE CELL LYMPHOMA RECURRENT	8	572.499	278.686	1176.08	0	0.6689
Indication	NEUTROPENIC SEPSIS	8	422.559	207.256	861.524	0	0.6689
Indication	IMMUNOSUPPRESSION	8	5.44123	2.72666	10.8583	0.00015	0.6689
Indication	FOLLICLE CENTRE LYMPHOMA, FOLLICULAR GRADE I, II, III STAGE I	7	7764.52	2613.25	23070	0	0.58528
Indication	NON-HODGKIN'S LYMPHOMA REFRACTORY	7	751.406	344.637	1638.28	0	0.58528
Indication	EXTRANODAL MARGINAL ZONE B-CELL LYMPHOMA (MALT TYPE)	7	242.641	114.38	514.732	0	0.58528
Indication	SURGICAL PRECONDITIONING	6	293.616	129.88	663.769	0	0.50167
Indication	MANTLE CELL LYMPHOMA STAGE IV	5	354.006	144.251	868.766	0	0.41806
Indication	ANTIFUNGAL PROPHYLAXIS	5	5.92425	2.46936	14.2129	0.00177	0.41806
Indication	ANTIVIRAL PROPHYLAXIS	5	4.42625	1.84514	10.618	0.00604	0.41806
Indication	GASTRITIS	5	3.1871	1.3287	7.64481	0.02194	0.41806
Indication	PYREXIA	5	2.40507	1.00272	5.76867	0.05992	0.41806
Indication	NON-HODGKIN'S LYMPHOMA UNSPECIFIED HISTOLOGY INDOLENT STAGE III	5	N/A	N/A	N/A	N/A	0.41806
Indication	FOLLICLE CENTRE LYMPHOMA, FOLLICULAR GRADE I, II, III STAGE II	4	6655.31	1666.37	26580.7	0	0.33445
Indication	B-CELL LYMPHOMA REFRACTORY	4	633.839	227.638	1764.87	0	0.33445
Indication	NODAL MARGINAL ZONE B-CELL LYMPHOMA	4	578.722	208.654	1605.15	0	0.33445
Indication	B-CELL SMALL LYMPHOCYTIC LYMPHOMA	4	67.7385	25.3382	181.091	0	0.33445
Indication	PAIN	4	0.15501	0.05827	0.41235	0	0.33445
Indication	RHEUMATOID ARTHRITIS	4	0.06246	0.02348	0.16615	0	0.33445
Indication	NEUTROPENIA	4	6.13534	2.3054	16.3279	0.00449	0.33445
Indication	IMMUNOSUPPRESSANT DRUG THERAPY	4	4.75209	1.78582	12.6454	0.01075	0.33445
Indication	B-CELL UNCLASSIFIABLE LYMPHOMA HIGH GRADE	3	4991.48	1118.32	22278.8	0	0.25084
Indication	B-CELL LYMPHOMA STAGE IV	3	289.361	91.206	918.03	0	0.25084
Indication	NON-HODGKIN'S LYMPHOMA UNSPECIFIED HISTOLOGY INDOLENT	3	48.9361	15.7395	152.149	4e-05	0.25084
Indication	CORD BLOOD TRANSPLANT THERAPY	3	35.4634	11.4193	110.135	0.0001	0.25084
Indication	ANXIETY	3	0.24547	0.07928	0.76005	0.00361	0.25084
Indication	PRURITUS	3	2.8761	0.92868	8.90727	0.08836	0.25084
Indication	PROPHYLAXIS OF NAUSEA AND VOMITING	3	2.85922	0.92323	8.85496	0.08954	0.25084
Indication	VOMITING	3	2.4973	0.80639	7.73387	0.12075	0.25084
Indication	NEUROPATHY PERIPHERAL	3	1.01857	0.32894	3.15399	0.7718	0.25084
Indication	EXTRANODAL MARGINAL ZONE B-CELL LYMPHOMA (MALT TYPE) STAGE III	2	13310.6	1207.72	146700	0	0.16722
Indication	FOLLICLE CENTRE LYMPHOMA DIFFUSE SMALL CELL LYMPHOMA	2	6655.31	938.225	47209.5	0	0.16722
Indication	NODAL MARGINAL ZONE B-CELL LYMPHOMA STAGE IV	2	2662.12	516.98	13708.2	0	0.16722
Indication	MANTLE CELL LYMPHOMA STAGE III	2	2218.44	448.195	10980.6	0	0.16722
Indication	OSTEOPOROSIS	2	0.10445	0.02615	0.41715	0	0.16722
Indication	TYPE 2 DIABETES MELLITUS	2	0.0984	0.02464	0.39302	0	0.16722
Indication	DIABETES MELLITUS	2	0.06762	0.01693	0.27007	0	0.16722
Indication	MULTIPLE SCLEROSIS	2	0.03528	0.00883	0.14092	0	0.16722
Indication	NO THERAPEUTIC RESPONSE	2	605.028	142.427	2570.15	1e-05	0.16722
Indication	NON-HODGKIN'S LYMPHOMA UNSPECIFIED HISTOLOGY AGGRESSIVE	2	242.011	59.0993	991.033	4e-05	0.16722
Indication	DIFFUSE LARGE B-CELL LYMPHOMA REFRACTORY	2	134.451	33.1979	544.522	0.00011	0.16722
Indication	MALIGNANT NEOPLASM PROGRESSION	2	84.2444	20.9094	339.422	0.00028	0.16722
Indication	DIFFUSE LARGE B-CELL LYMPHOMA RECURRENT	2	70.8011	17.5973	284.862	0.0004	0.16722
Indication	HEPATITIS C	2	0.15831	0.03964	0.63227	0.00056	0.16722
Indication	NEUTROPHIL COUNT DECREASED	2	44.5171	11.0947	178.622	0.00099	0.16722
Indication	ANAEMIA OF MALIGNANT DISEASE	2	10.3584	2.59077	41.4154	0.01643	0.16722
Indication	LIVER DISORDER	2	8.17605	2.04539	32.6822	0.02548	0.16722
Indication	BONE MARROW TRANSPLANT	2	8.0524	2.01448	32.1875	0.02621	0.16722
Indication	SJOGREN'S SYNDROME	2	7.09143	1.77425	28.3434	0.03305	0.16722
Indication	INTERSTITIAL LUNG DISEASE	2	6.20252	1.55199	24.7883	0.04208	0.16722
Indication	CYSTITIS	2	4.39294	1.09941	17.553	0.07698	0.16722
Indication	HEPATITIS B	2	2.15208	0.53872	8.59713	0.23831	0.16722
Indication	PROPHYLAXIS AGAINST TRANSPLANT REJECTION	2	1.73135	0.43342	6.91609	0.32119	0.16722
Indication	HYPERLIPIDAEMIA	2	0.49465	0.12385	1.9757	0.45271	0.16722
Indication	NAUSEA	2	0.5125	0.12831	2.04698	0.60432	0.16722
Indication	CHEMOTHERAPY	2	1.37407	0.34399	5.48869	0.66034	0.16722
Indication	INFECTION	2	1.07154	0.26826	4.28009	0.71129	0.16722
Indication	CARDIAC FAILURE	2	1.05799	0.26487	4.22599	0.7145	0.16722
Indication	VITAMIN SUPPLEMENTATION	2	0.63843	0.15984	2.55	0.7763	0.16722
Indication	NEOPLASM MALIGNANT	2	0.99705	0.24962	3.98254	1	0.16722
Indication	ANAEMIA	2	0.84058	0.21045	3.3575	1	0.16722
Indication	EXTRANODAL MARGINAL ZONE B-CELL LYMPHOMA (MALT TYPE) STAGE II	2	N/A	N/A	N/A	N/A	0.16722
Indication	ATRIAL FIBRILLATION	1	0.06302	0.00888	0.44701	0	0.08361
Indication	ASTHMA	1	0.07432	0.01048	0.52719	5e-05	0.08361
Indication	Carbohydrate antigen 15-3 increased	1	6655.31	416.502	106346	0.0003	0.08361
Indication	EXTRANODAL MARGINAL ZONE B-CELL LYMPHOMA (MALT TYPE) STAGE IV	1	6655.31	416.502	106346	0.0003	0.08361
Indication	NON-HODGKIN'S LYMPHOMA TRANSFORMED RECURRENT	1	3327.65	301.929	36675.1	0.00045	0.08361
Indication	GASTROOESOPHAGEAL REFLUX DISEASE	1	0.0937	0.01321	0.66464	0.00054	0.08361
Indication	B-CELL UNCLASSIFIABLE LYMPHOMA LOW GRADE	1	1663.83	186.096	14875.8	0.00075	0.08361
Indication	B-CELL SMALL LYMPHOCYTIC LYMPHOMA STAGE IV	1	1109.22	133.637	9206.76	0.00105	0.08361
Indication	NON-HODGKIN'S LYMPHOMA STAGE I	1	605.028	78.1716	4682.76	0.0018	0.08361
Indication	NON-HODGKIN'S LYMPHOMA UNSPECIFIED HISTOLOGY INDOLENT STAGE IV	1	511.947	67.0221	3910.49	0.0021	0.08361
Indication	HIV INFECTION CDC CATEGORY C3	1	201.676	27.6049	1473.4	0.0051	0.08361
Indication	NON-HODGKIN'S LYMPHOMA STAGE III	1	154.775	21.3301	1123.07	0.00659	0.08361
Indication	AUTOLOGOUS BONE MARROW TRANSPLANTATION THERAPY	1	138.652	19.1532	1003.72	0.00733	0.08361
Indication	Marginal zone lymphoma	1	118.845	16.4645	857.849	0.00853	0.08361
Indication	HYPOTHYROIDISM	1	0.1345	0.01896	0.95413	0.00901	0.08361
Indication	DIFFUSE LARGE B-CELL LYMPHOMA STAGE III	1	103.989	14.4378	748.991	0.00972	0.08361
Indication	BURKITT'S LYMPHOMA STAGE IV	1	96.4537	13.4063	693.951	0.01046	0.08361
Indication	MANTLE CELL LYMPHOMA REFRACTORY	1	95.0758	13.2174	683.899	0.01061	0.08361
Indication	ACUTE GRAFT VERSUS HOST DISEASE IN SKIN	1	88.7374	12.3477	637.715	0.01135	0.08361
Indication	ESCHERICHIA BACTERAEMIA	1	82.1643	11.4441	589.909	0.01224	0.08361
Indication	ARTHRITIS	1	0.14111	0.01989	1.00096	0.01285	0.08361
Indication	CYTOMEGALOVIRUS COLITIS	1	77.3873	10.7863	555.223	0.01299	0.08361
Indication	PSYCHOSOMATIC DISEASE	1	65.2481	9.11051	467.297	0.01536	0.08361
Indication	BONE MARROW DISORDER	1	63.3839	8.85262	453.822	0.0158	0.08361
Indication	RADIOISOTOPE SCAN	1	58.8965	8.2313	421.415	0.01698	0.08361
Indication	HYPERTHERMIA	1	41.0821	5.75662	293.183	0.02419	0.08361
Indication	DIFFUSE LARGE B-CELL LYMPHOMA STAGE IV	1	38.47	5.39266	274.436	0.0258	0.08361
Indication	NEOPLASM RECURRENCE	1	36.3678	5.09955	259.359	0.02727	0.08361
Indication	CHOLESTASIS	1	35.4006	4.96463	252.425	0.028	0.08361
Indication	THROMBOSIS PROPHYLAXIS	1	0.16815	0.0237	1.19282	0.0366	0.08361
Indication	DECUBITUS ULCER	1	26.202	3.67958	186.582	0.03759	0.08361
Indication	NEURITIS	1	23.769	3.3391	169.196	0.04134	0.08361
Indication	LYMPHOCYTIC LYMPHOMA	1	23.2703	3.26929	165.634	0.0422	0.08361
Indication	DISEASE PROGRESSION	1	20.4151	2.86935	145.25	0.04794	0.08361
Indication	ALLOGENIC BONE MARROW TRANSPLANTATION THERAPY	1	18.487	2.5991	131.495	0.05279	0.08361
Indication	BONE MARROW FAILURE	1	17.1972	2.41822	122.298	0.05663	0.08361
Indication	COLONY STIMULATING FACTOR PROPHYLAXIS	1	16.3521	2.29968	116.273	0.05946	0.08361
Indication	DISEASE RECURRENCE	1	14.9222	2.09903	106.084	0.06496	0.08361
Indication	ARTHRITIS BACTERIAL	1	12.8481	1.80782	91.3106	0.07502	0.08361
Indication	PLATELET COUNT DECREASED	1	12.1669	1.71215	86.4609	0.07904	0.08361
Indication	TUMOUR LYSIS SYNDROME	1	11.6965	1.64606	83.1122	0.08208	0.08361
Indication	HAEMATOPOIETIC STEM CELL MOBILISATION	1	11.4352	1.60936	81.2527	0.08387	0.08361
Indication	HYPOMAGNESAEMIA	1	9.61749	1.3539	68.3185	0.09889	0.08361
Indication	ANTIALLERGIC THERAPY	1	9.60362	1.35195	68.2198	0.09902	0.08361
Indication	FIBROMYALGIA	1	0.21596	0.03044	1.53193	0.10083	0.08361
Indication	BOWEL MOVEMENT IRREGULARITY	1	9.33423	1.31408	66.3035	0.10173	0.08361
Indication	MUCOSAL INFLAMMATION	1	8.88559	1.251	63.1125	0.10657	0.08361
Indication	THERAPEUTIC PROCEDURE	1	8.41379	1.18466	59.7573	0.11219	0.08361
Indication	RENAL IMPAIRMENT	1	8.16602	1.14981	57.9954	0.11539	0.08361
Indication	DUODENAL ULCER	1	7.28152	1.0254	51.7069	0.12845	0.08361
Indication	SLEEP DISORDER	1	0.22654	0.03194	1.60702	0.14447	0.08361
Indication	METASTASIS	1	6.0946	0.85841	43.2709	0.15145	0.08361
Indication	ASPERGILLOSIS	1	5.44624	0.76716	38.664	0.16787	0.08361
Indication	Invasive ductal breast carcinoma	1	5.25281	0.73994	37.2897	0.17348	0.08361
Indication	CARDIAC DISORDER	1	0.26622	0.03753	1.88853	0.19727	0.08361
Indication	TRANSPLANT	1	4.55219	0.64131	32.3127	0.19734	0.08361
Indication	DYSPEPSIA	1	0.25996	0.03665	1.84412	0.19805	0.08361
Indication	CARCINOID SYNDROME	1	4.19364	0.59083	29.766	0.21228	0.08361
Indication	REFLUX OESOPHAGITIS	1	3.98045	0.56081	28.2519	0.22228	0.08361
Indication	BASEDOW'S DISEASE	1	3.9334	0.55419	27.9178	0.22461	0.08361
Indication	ASTHENIA	1	3.75158	0.52858	26.6266	0.23411	0.08361
Indication	PERIPHERAL ARTERIAL OCCLUSIVE DISEASE	1	3.59746	0.50688	25.5322	0.24281	0.08361
Indication	LEUKAEMIA	1	3.57236	0.50334	25.3539	0.24428	0.08361
Indication	ADJUVANT THERAPY	1	3.43411	0.48388	24.3722	0.25275	0.08361
Indication	HYPOAESTHESIA	1	3.30288	0.46539	23.4404	0.26135	0.08361
Indication	OROPHARYNGEAL PAIN	1	3.17827	0.44784	22.5557	0.27007	0.08361
Indication	DECREASED APPETITE	1	3.14523	0.44319	22.3211	0.27248	0.08361
Indication	GRAFT VERSUS HOST DISEASE	1	2.80696	0.39554	19.9195	0.29983	0.08361
Indication	THROMBOCYTOPENIA	1	2.64519	0.37276	18.771	0.31492	0.08361
Indication	MEDICAL DIET	1	2.50954	0.35365	17.8081	0.32878	0.08361
Indication	THYROID DISORDER	1	0.34151	0.04814	2.42261	0.38233	0.08361
Indication	DEEP VEIN THROMBOSIS	1	0.32814	0.04626	2.32777	0.38432	0.08361
Indication	CHRONIC LYMPHOCYTIC LEUKAEMIA	1	0.32081	0.04522	2.27581	0.38648	0.08361
Indication	MYELODYSPLASTIC SYNDROME	1	0.31793	0.04482	2.25537	0.38756	0.08361
Indication	GASTRITIS PROPHYLAXIS	1	2.00461	0.28251	14.2239	0.3929	0.08361
Indication	URTICARIA	1	1.9932	0.28091	14.143	0.39463	0.08361
Indication	CARDIOVASCULAR DISORDER	1	1.75048	0.24671	12.4202	0.43533	0.08361
Indication	ANXIETY DISORDER	1	1.74955	0.24658	12.4137	0.4355	0.08361
Indication	POLLAKIURIA	1	1.69778	0.23928	12.0463	0.44526	0.08361
Indication	SEPSIS	1	1.5254	0.21499	10.8229	0.481	0.08361
Indication	HODGKIN'S DISEASE	1	1.46014	0.2058	10.3597	0.49599	0.08361
Indication	ROUTINE HEALTH MAINTENANCE	1	1.45822	0.20553	10.3461	0.49645	0.08361
Indication	RECTAL CANCER	1	1.39641	0.19682	9.90751	0.51151	0.08361
Indication	BENIGN PROSTATIC HYPERPLASIA	1	0.4071	0.05739	2.88796	0.52904	0.08361
Indication	BREAST CANCER METASTATIC	1	0.34984	0.04932	2.4817	0.54196	0.08361
Indication	FUNGAL INFECTION	1	1.15564	0.16289	8.19891	0.57925	0.08361
Indication	CHEST PAIN	1	1.12592	0.1587	7.98804	0.58876	0.08361
Indication	LIVER TRANSPLANT	1	1.08181	0.15248	7.67507	0.60339	0.08361
Indication	OFF LABEL USE	1	0.48735	0.0687	3.4573	0.72926	0.08361
Indication	HYPERURICAEMIA	1	0.91608	0.12913	6.49908	1	0.08361
Indication	PROPHYLAXIS AGAINST GASTROINTESTINAL ULCER	1	0.87386	0.12318	6.19952	1	0.08361
Indication	HAEMOLYTIC URAEMIC SYNDROME	1	0.71833	0.10125	5.096	1	0.08361
Indication	NASOPHARYNGITIS	1	0.60679	0.08553	4.30468	1	0.08361
Indication	ANALGESIC THERAPY	1	0.56607	0.07979	4.01577	1	0.08361
Indication	METASTASES TO BONE	1	0.50626	0.07136	3.59143	1	0.08361
Indication	MANTLE CELL LYMPHOMA STAGE I	1	N/A	N/A	N/A	N/A	0.08361
Reaction	Thrombocytopenia	151	21.4088	18.4384	24.8577	0	12.6254
Reaction	Neutropenia	124	18.9514	16.0382	22.3937	0	10.3679
Reaction	Sepsis	98	12.9643	10.7219	15.6756	0	8.19398
Reaction	White blood cell count decreased	84	13.1677	10.7117	16.1867	0	7.02341
Reaction	Myelodysplastic syndrome	83	74.1464	60.1755	91.3609	0	6.9398
Reaction	Platelet count decreased	80	11.9573	9.67421	14.7793	0	6.68896
Reaction	Pyrexia	79	3.38215	2.73285	4.18572	0	6.60535
Reaction	Pancytopenia	78	19.9851	16.1203	24.7766	0	6.52174
Reaction	Febrile neutropenia	76	20.9131	16.8179	26.0054	0	6.35452
Reaction	Disease progression	76	10.9576	8.81343	13.6234	0	6.35452
Reaction	Anaemia	65	4.72957	3.73347	5.99144	0	5.43478
Reaction	Bone marrow failure	63	37.2631	29.2813	47.4206	0	5.26756
Reaction	Diarrhoea	60	1.6929	1.32287	2.16643	0.00011	5.01672
Reaction	Pneumonia	57	2.94366	2.28473	3.79262	0	4.76589
Reaction	Haemoglobin decreased	51	6.6003	5.0452	8.63474	0	4.26421
Reaction	Meningitis tuberculous	49	1489.09	1098.17	2019.15	0	4.09699
Reaction	Stem cell transplant	45	183.286	137.05	245.12	0	3.76254
Reaction	Multi-organ failure	44	15.858	11.8618	21.2005	0	3.67893
Reaction	Acute myeloid leukaemia	43	42.4849	31.6489	57.0309	0	3.59532
Reaction	Leukopenia	43	13.6477	10.1735	18.3083	0	3.59532
Reaction	Neutrophil count decreased	42	19.4451	14.441	26.1832	0	3.51171
Reaction	Progressive multifocal leukoencephalopathy	38	64.4664	47.074	88.2847	0	3.17726
Reaction	Nausea	36	0.69941	0.507	0.96485	0.02685	3.01003
Reaction	Cytomegalovirus infection	33	37.3894	26.6813	52.3948	0	2.7592
Reaction	Septic shock	33	12.7378	9.0956	17.8385	0	2.7592
Reaction	Malignant neoplasm progression	33	7.30622	5.21785	10.2304	0	2.7592
Reaction	Mucosal inflammation	32	19.6902	13.9823	27.7284	0	2.67559
Reaction	Infection	32	4.02749	2.86115	5.6693	0	2.67559
Reaction	Renal failure	31	3.46305	2.44641	4.90216	0	2.59197
Reaction	Non-Hodgkin's lymphoma	30	76.7625	53.8016	109.522	0	2.50836
Reaction	Hypotension	27	2.06259	1.42047	2.995	0.00066	2.25753
Reaction	Respiratory failure	26	4.85721	3.32057	7.10495	0	2.17391
Reaction	General physical health deterioration	26	4.15837	2.84287	6.08258	0	2.17391
Reaction	Drug toxicity	25	11.0341	7.48408	16.2679	0	2.0903
Reaction	Death	25	0.48813	0.33119	0.71944	6e-05	2.0903
Reaction	Pleural effusion	23	5.04672	3.3664	7.56577	0	1.92308
Reaction	Renal failure acute	23	2.24275	1.49615	3.36191	0.00042	1.92308
Reaction	Pain	23	0.66139	0.44124	0.99139	0.04694	1.92308
Reaction	Vomiting	23	0.73587	0.49092	1.10302	0.14663	1.92308
Reaction	Asthenia	23	0.92086	0.61433	1.38032	0.76204	1.92308
Reaction	Fatigue	22	0.50458	0.33352	0.76338	0.00036	1.83946
Reaction	Condition aggravated	22	1.62884	1.0766	2.46436	0.02737	1.83946
Reaction	Acute graft versus host disease in skin	21	93.4859	60.9989	143.275	0	1.75585
Reaction	Graft versus host disease	21	38.855	25.3973	59.4437	0	1.75585
Reaction	Abdominal pain	21	1.33943	0.87657	2.04669	0.2007	1.75585
Reaction	Lymphoma	20	18.891	12.2248	29.1922	0	1.67224
Reaction	Disease recurrence	19	12.2506	7.83884	19.1454	0	1.58863
Reaction	Acute graft versus host disease in intestine	18	162.545	102.188	258.55	0	1.50502
Reaction	Hypersensitivity	18	1.69773	1.07331	2.68543	0.02966	1.50502
Reaction	Staphylococcal infection	17	6.17039	3.84803	9.89433	0	1.4214
Reaction	Herpes zoster	17	4.96752	3.09802	7.96517	0	1.4214
Reaction	Aplasia	16	104.295	63.8579	170.337	0	1.33779
Reaction	Haematotoxicity	16	37.7071	23.1442	61.4335	0	1.33779
Reaction	Lymphadenopathy	16	6.59635	4.05342	10.7346	0	1.33779
Reaction	Stomatitis	16	4.75485	2.92203	7.7373	0	1.33779
Reaction	Dyspnoea	16	0.4373	0.26878	0.71148	0.0002	1.33779
Reaction	Haematocrit decreased	15	8.10239	4.89867	13.4014	0	1.25418
Reaction	Weight decreased	15	0.86799	0.52493	1.43526	0.71525	1.25418
Reaction	Dizziness	14	0.41382	0.24583	0.69659	0.00016	1.17057
Reaction	Cardiac failure	14	2.62648	1.56015	4.42161	0.00123	1.17057
Reaction	Off label use	14	0.6225	0.3698	1.04788	0.07016	1.17057
Reaction	Cardiac failure congestive	14	1.58247	0.94004	2.66394	0.08896	1.17057
Reaction	Dehydration	14	1.39033	0.82591	2.34047	0.20345	1.17057
Reaction	Oedema peripheral	14	0.81862	0.4863	1.37803	0.54186	1.17057
Reaction	Decreased appetite	14	0.92482	0.54939	1.5568	0.89697	1.17057
Reaction	Cough	14	0.90795	0.53936	1.5284	0.89751	1.17057
Reaction	Chest pain	14	0.95418	0.56683	1.60623	1	1.17057
Reaction	Blood lactate dehydrogenase increased	13	8.36336	4.86893	14.3658	0	1.08696
Reaction	Red blood cell count decreased	13	7.2298	4.20919	12.418	0	1.08696
Reaction	No therapeutic response	13	4.44029	2.58543	7.62586	1e-05	1.08696
Reaction	Lung disorder	13	4.33701	2.52531	7.44845	2e-05	1.08696
Reaction	Atrial fibrillation	13	2.04295	1.18966	3.50827	0.01519	1.08696
Reaction	Fall	13	0.59985	0.34933	1.03004	0.06419	1.08696
Reaction	Neutropenic sepsis	12	23.25	13.2282	40.8642	0	1.00334
Reaction	Acute respiratory distress syndrome	12	9.74779	5.54928	17.1229	0	1.00334
Reaction	Stevens-Johnson syndrome	12	6.00434	3.41873	10.5455	0	1.00334
Reaction	Hyponatraemia	12	3.11444	1.77351	5.46925	0.00065	1.00334
Reaction	Rash	12	0.50609	0.28822	0.88864	0.01228	1.00334
Reaction	Tachycardia	12	2.03703	1.16003	3.57704	0.02022	1.00334
Reaction	Erythema	12	1.14308	0.65098	2.00719	0.63926	1.00334
Reaction	Blood culture positive	11	27.4291	15.2129	49.4551	0	0.91973
Reaction	Lung infiltration	11	11.2906	6.26658	20.3425	0	0.91973
Reaction	Hepatotoxicity	11	9.79769	5.43833	17.6515	0	0.91973
Reaction	Headache	11	0.27353	0.15189	0.49258	0	0.91973
Reaction	Hypokalaemia	11	3.6905	2.04901	6.64698	0.00027	0.91973
Reaction	Neoplasm malignant	11	2.93338	1.62871	5.28316	0.00171	0.91973
Reaction	Contusion	11	1.75555	0.97479	3.16167	0.06776	0.91973
Reaction	Chills	11	1.36733	0.75924	2.46246	0.28425	0.91973
Reaction	Confusional state	11	0.95376	0.5296	1.71761	1	0.91973
Reaction	Febrile bone marrow aplasia	10	50.3047	27.0731	93.4713	0	0.83612
Reaction	B-cell lymphoma	10	39.2181	21.1174	72.8337	0	0.83612
Reaction	Bronchopulmonary aspergillosis	10	25.558	13.7708	47.4347	0	0.83612
Reaction	Lung neoplasm	10	19.2239	10.361	35.6682	0	0.83612
Reaction	Cholestasis	10	8.96338	4.83325	16.6228	0	0.83612
Reaction	Ascites	10	4.75549	2.56477	8.81744	7e-05	0.83612
Reaction	Malaise	10	0.34222	0.18461	0.6344	7e-05	0.83612
Reaction	Hypoxia	10	4.54287	2.45012	8.42313	0.0001	0.83612
Reaction	Hepatic failure	10	4.09608	2.2092	7.59455	0.00023	0.83612
Reaction	Interstitial lung disease	10	3.58255	1.93228	6.64226	0.00063	0.83612
Reaction	Oedema	10	2.47464	1.33479	4.5879	0.00858	0.83612
Reaction	Renal impairment	10	2.20791	1.19093	4.09333	0.02827	0.83612
Reaction	Aspartate aminotransferase increased	10	2.11844	1.14268	3.92745	0.03138	0.83612
Reaction	Alanine aminotransferase increased	10	1.90992	1.03021	3.54083	0.04612	0.83612
Reaction	Sinusitis	10	1.56784	0.8457	2.90659	0.1585	0.83612
Reaction	Back pain	10	0.64816	0.34964	1.20156	0.19832	0.83612
Reaction	Cerebrovascular accident	10	0.6664	0.35948	1.23537	0.24031	0.83612
Reaction	Urinary tract infection	10	1.00679	0.54309	1.86643	0.87363	0.83612
Reaction	Catheter related infection	9	48.5395	25.2574	93.2828	0	0.75251
Reaction	Acute graft versus host disease	9	28.0946	14.6337	53.9378	0	0.75251
Reaction	Lymphopenia	9	12.3272	6.42585	23.6481	0	0.75251
Reaction	Drug ineffective	9	0.13215	0.06893	0.25336	0	0.75251
Reaction	Lung neoplasm malignant	9	4.86499	2.53693	9.32943	0.00013	0.75251
Reaction	Respiratory distress	9	4.35652	2.27184	8.35414	0.0003	0.75251
Reaction	Fungal infection	9	4.3064	2.24571	8.25802	0.00032	0.75251
Reaction	Liver disorder	9	2.92384	1.52483	5.60641	0.00443	0.75251
Reaction	Coma	9	2.73343	1.42554	5.24127	0.00674	0.75251
Reaction	Blood creatinine increased	9	1.81508	0.94665	3.4802	0.10657	0.75251
Reaction	Epistaxis	9	1.79916	0.93835	3.44968	0.1079	0.75251
Reaction	Deep vein thrombosis	9	1.4467	0.75453	2.77382	0.22828	0.75251
Reaction	Haemorrhage	9	1.25867	0.65647	2.41329	0.44926	0.75251
Reaction	Gastrointestinal haemorrhage	9	1.19214	0.62177	2.28571	0.57982	0.75251
Reaction	Venoocclusive disease	8	61.1982	30.5782	122.48	0	0.6689
Reaction	Aspergillosis	8	35.7812	17.902	71.5168	0	0.6689
Reaction	Pneumonia bacterial	8	19.6033	9.81616	39.1485	0	0.6689
Reaction	Clostridium difficile colitis	8	11.5293	5.77564	23.0148	0	0.6689
Reaction	Lymphocyte count decreased	8	8.78154	4.39976	17.5272	1e-05	0.6689
Reaction	C-reactive protein increased	8	3.96179	1.98545	7.90539	0.00115	0.6689
Reaction	Hepatic function abnormal	8	3.35006	1.67893	6.68452	0.00321	0.6689
Reaction	Blood alkaline phosphatase increased	8	3.29104	1.64936	6.56675	0.00356	0.6689
Reaction	Skin exfoliation	8	2.71978	1.36311	5.42673	0.0106	0.6689
Reaction	Depression	8	0.44385	0.22247	0.88549	0.01233	0.6689
Reaction	Gastrointestinal disorder	8	1.97085	0.98779	3.93224	0.07158	0.6689
Reaction	Gait disturbance	8	0.59241	0.29694	1.18188	0.16824	0.6689
Reaction	Abdominal pain upper	8	0.61986	0.31069	1.23665	0.2061	0.6689
Reaction	Dysphagia	8	1.27438	0.63875	2.54256	0.42219	0.6689
Reaction	Non-Hodgkin's lymphoma recurrent	7	203.437	96.1058	430.637	0	0.58528
Reaction	Mantle cell lymphoma	7	95.4655	45.3684	200.881	0	0.58528
Reaction	Cytogenetic abnormality	7	61.2183	29.1484	128.573	0	0.58528
Reaction	Chronic graft versus host disease	7	34.5859	16.492	72.5308	0	0.58528
Reaction	Rectal cancer	7	29.6167	14.1265	62.0928	0	0.58528
Reaction	Enteritis	7	22.972	10.9611	48.1439	0	0.58528
Reaction	Enterococcal infection	7	22.5059	10.739	47.1658	0	0.58528
Reaction	Protein total decreased	7	20.8164	9.93379	43.6211	0	0.58528
Reaction	Pseudomonas infection	7	13.8364	6.60543	28.9831	0	0.58528
Reaction	Candidiasis	7	10.2615	4.89976	21.4905	1e-05	0.58528
Reaction	Basal cell carcinoma	7	7.81008	3.72975	16.3543	4e-05	0.58528
Reaction	Colon cancer	7	7.11363	3.39728	14.8953	7e-05	0.58528
Reaction	Pancreatic carcinoma	7	6.73517	3.21661	14.1026	0.0001	0.58528
Reaction	Subdural haematoma	7	6.62125	3.16223	13.864	0.00012	0.58528
Reaction	Arthralgia	7	0.30224	0.1444	0.63262	0.00014	0.58528
Reaction	Gamma-glutamyltransferase increased	7	3.44809	1.64706	7.21853	0.00487	0.58528
Reaction	Gastritis	7	3.32837	1.58988	6.96785	0.00586	0.58528
Reaction	Cardio-respiratory arrest	7	1.93179	0.92284	4.04384	0.10148	0.58528
Reaction	Breast cancer	7	1.49957	0.71638	3.13899	0.24363	0.58528
Reaction	Hypoaesthesia	7	0.65917	0.31492	1.37976	0.35212	0.58528
Reaction	Neuropathy peripheral	7	1.36184	0.65059	2.85066	0.37111	0.58528
Reaction	Heart rate increased	7	1.03827	0.49602	2.17331	0.84569	0.58528
Reaction	Syncope	7	0.9631	0.46011	2.01596	1	0.58528
Reaction	Mantle cell lymphoma recurrent	6	623.935	270.733	1437.93	0	0.50167
Reaction	Engraftment syndrome	6	175.14	78.0181	393.164	0	0.50167
Reaction	Refractory anaemia with an excess of blasts	6	154.177	68.7658	345.674	0	0.50167
Reaction	Encephalitis viral	6	75.3431	33.7631	168.13	0	0.50167
Reaction	Human herpesvirus 6 infection	6	55.2308	24.7801	123.1	0	0.50167
Reaction	Gastrointestinal toxicity	6	29.7112	13.3508	66.1198	0	0.50167
Reaction	Venoocclusive liver disease	6	23.5864	10.6026	52.4704	0	0.50167
Reaction	Pulmonary toxicity	6	21.4112	9.62599	47.6251	0	0.50167
Reaction	Escherichia infection	6	12.569	5.65377	27.9425	1e-05	0.50167
Reaction	Hyperthermia	6	10.9854	4.94188	24.4195	2e-05	0.50167
Reaction	Malnutrition	6	7.55855	3.40099	16.7985	0.00018	0.50167
Reaction	Hypercalcaemia	6	7.51305	3.38053	16.6974	0.00018	0.50167
Reaction	Ataxia	6	6.67199	3.00224	14.8274	0.00034	0.50167
Reaction	Myocardial infarction	6	0.31721	0.14279	0.70467	0.00104	0.50167
Reaction	Bacterial infection	6	5.14984	2.31752	11.4436	0.00129	0.50167
Reaction	Device related infection	6	4.95064	2.2279	11.0008	0.00157	0.50167
Reaction	Neoplasm progression	6	4.85316	2.18405	10.7842	0.00173	0.50167
Reaction	Prostate cancer	6	4.80412	2.16199	10.6752	0.00182	0.50167
Reaction	Skin lesion	6	3.7046	1.66728	8.23138	0.00636	0.50167
Reaction	Blood urea increased	6	3.44062	1.5485	7.64472	0.00894	0.50167
Reaction	Bladder cancer	6	3.30781	1.48874	7.34957	0.01069	0.50167
Reaction	Post procedural complication	6	3.25761	1.46615	7.23802	0.01145	0.50167
Reaction	Hypophagia	6	2.8401	1.27828	6.3102	0.02089	0.50167
Reaction	Mental status changes	6	2.56714	1.15544	5.70363	0.0319	0.50167
Reaction	Blood bilirubin increased	6	2.49855	1.12457	5.55122	0.03562	0.50167
Reaction	Rash erythematous	6	2.28941	1.03045	5.08649	0.05041	0.50167
Reaction	Cellulitis	6	1.74917	0.78732	3.88609	0.16525	0.50167
Reaction	Abdominal discomfort	6	0.63628	0.28642	1.41352	0.32614	0.50167
Reaction	Blood pressure decreased	6	1.28588	0.57881	2.85674	0.48075	0.50167
Reaction	Pulmonary embolism	6	0.72798	0.32769	1.61723	0.59728	0.50167
Reaction	Cardiac disorder	6	0.83426	0.37553	1.85335	0.85094	0.50167
Reaction	Paraneoplastic syndrome	5	88.5014	36.6896	213.48	0	0.41806
Reaction	Perirectal abscess	5	46.4108	19.2935	111.642	0	0.41806
Reaction	Lung infection pseudomonal	5	38.7387	16.1123	93.1392	0	0.41806
Reaction	Bone marrow disorder	5	24.5221	10.2088	58.9033	0	0.41806
Reaction	Neoplasm recurrence	5	22.6217	9.41886	54.3316	0	0.41806
Reaction	Diffuse large B-cell lymphoma	5	19.9859	8.32285	47.9927	1e-05	0.41806
Reaction	Oesophageal carcinoma	5	19.3243	8.04771	46.4021	1e-05	0.41806
Reaction	Arthritis bacterial	5	18.3039	7.62326	43.9489	1e-05	0.41806
Reaction	Pathogen resistance	5	17.0736	7.11145	40.9916	1e-05	0.41806
Reaction	Chronic myeloid leukaemia	5	16.0834	6.69943	38.6116	2e-05	0.41806
Reaction	Squamous cell carcinoma of skin	5	15.6669	6.52613	37.6107	2e-05	0.41806
Reaction	Extravasation	5	14.7176	6.13108	35.3296	3e-05	0.41806
Reaction	Blood pressure diastolic decreased	5	11.7751	4.90625	28.2607	8e-05	0.41806
Reaction	Pain in extremity	5	0.24195	0.10089	0.58024	8e-05	0.41806
Reaction	Thrombotic microangiopathy	5	11.2459	4.68589	26.9895	0.0001	0.41806
Reaction	Hypoalbuminaemia	5	9.56497	3.98594	22.9529	0.00021	0.41806
Reaction	Granulocytopenia	5	8.96942	3.7379	21.5229	0.00028	0.41806
Reaction	Oropharyngeal blistering	5	8.95012	3.72986	21.4765	0.00028	0.41806
Reaction	Bronchopneumonia	5	8.91654	3.71588	21.3959	0.00029	0.41806
Reaction	Blood disorder	5	8.70658	3.62843	20.8918	0.00032	0.41806
Reaction	Ecchymosis	5	8.66125	3.60955	20.783	0.00033	0.41806
Reaction	Squamous cell carcinoma	5	8.15202	3.39744	19.5604	0.00043	0.41806
Reaction	Myopathy	5	7.9934	3.33137	19.1796	0.00047	0.41806
Reaction	Refusal of treatment by patient	5	7.37675	3.0745	17.6993	0.00068	0.41806
Reaction	Petechiae	5	6.80502	2.83632	16.3269	0.00097	0.41806
Reaction	Splenomegaly	5	6.20021	2.58434	14.8752	0.00146	0.41806
Reaction	Arteriosclerosis	5	5.4267	2.26204	13.0188	0.00258	0.41806
Reaction	Generalised oedema	5	5.33705	2.22469	12.8036	0.00277	0.41806
Reaction	Acute respiratory failure	5	4.82338	2.01064	11.571	0.00424	0.41806
Reaction	Metastases to liver	5	4.78661	1.99532	11.4827	0.00437	0.41806
Reaction	Mitral valve incompetence	5	4.71072	1.96369	11.3006	0.00467	0.41806
Reaction	Hypertension	5	0.35321	0.14728	0.84708	0.01024	0.41806
Reaction	Respiratory tract infection	5	3.62529	1.51133	8.69612	0.0134	0.41806
Reaction	Transaminases increased	5	3.58043	1.49263	8.5885	0.01407	0.41806
Reaction	Clostridial infection	5	3.57505	1.49039	8.57558	0.01415	0.41806
Reaction	Encephalopathy	5	3.16738	1.32048	7.5975	0.02245	0.41806
Reaction	Skin ulcer	5	3.02184	1.25981	7.24832	0.02674	0.41806
Reaction	Shock	5	2.97803	1.24155	7.14322	0.02822	0.41806
Reaction	Constipation	5	0.41224	0.17189	0.98865	0.04115	0.41806
Reaction	Tremor	5	0.41008	0.17099	0.98346	0.04153	0.41806
Reaction	Colitis	5	2.66042	1.10916	6.38125	0.04232	0.41806
Reaction	Dyspnoea exertional	5	2.62288	1.09351	6.2912	0.04448	0.41806
Reaction	Rash macular	5	2.60972	1.08803	6.25962	0.04527	0.41806
Reaction	Aphasia	5	2.19966	0.91709	5.27593	0.08048	0.41806
Reaction	Jaundice	5	2.04892	0.85425	4.91432	0.10082	0.41806
Reaction	Cerebral haemorrhage	5	1.892	0.78884	4.5379	0.19943	0.41806
Reaction	Pulmonary oedema	5	1.52365	0.63528	3.65433	0.2713	0.41806
Reaction	Palpitations	5	0.62518	0.26068	1.49935	0.3737	0.41806
Reaction	Hepatic enzyme increased	5	1.28809	0.53707	3.08932	0.44829	0.41806
Reaction	No adverse event	5	0.65362	0.27254	1.56756	0.46501	0.41806
Reaction	Bronchitis	5	0.90982	0.37936	2.18202	1	0.41806
Reaction	Unevaluable event	5	0.88248	0.36796	2.11646	1	0.41806
Reaction	Acute myelomonocytic leukaemia	4	186.162	69.0358	502.007	0	0.33445
Reaction	B-cell lymphoma recurrent	4	181.097	67.1821	488.167	0	0.33445
Reaction	Angiosarcoma	4	147.079	54.6976	395.485	0	0.33445
Reaction	Refractory anaemia	4	120.458	44.8847	323.275	0	0.33445
Reaction	Culture stool positive	4	97.5136	36.3963	261.26	0	0.33445
Reaction	Therapy responder	4	68.7887	25.729	183.912	0	0.33445
Reaction	Bone marrow toxicity	4	35.7812	13.4157	95.4324	1e-05	0.33445
Reaction	Hypoproteinaemia	4	29.2863	10.9858	78.0724	1e-05	0.33445
Reaction	Lymphocytosis	4	26.8359	10.0684	71.5272	2e-05	0.33445
Reaction	Acute prerenal failure	4	21.3653	8.01918	56.9233	4e-05	0.33445
Reaction	Blood blister	4	17.8307	6.69424	47.4936	9e-05	0.33445
Reaction	Pruritus	4	0.21222	0.07978	0.56453	0.0001	0.33445
Reaction	Bacterial sepsis	4	16.8916	6.34213	44.9892	0.00011	0.33445
Reaction	Skin toxicity	4	16.3722	6.14734	43.6041	0.00012	0.33445
Reaction	Klebsiella infection	4	15.2295	5.71877	40.5574	0.00016	0.33445
Reaction	Lacunar infarction	4	14.9642	5.61923	39.8499	0.00017	0.33445
Reaction	Enterocolitis	4	14.3821	5.40089	38.2982	0.0002	0.33445
Reaction	Cardiotoxicity	4	12.0024	4.50802	31.9556	0.00039	0.33445
Reaction	Aplastic anaemia	4	11.1619	4.19263	29.7162	0.00052	0.33445
Reaction	Pneumocystis jiroveci pneumonia	4	9.9967	3.75527	26.6117	0.00078	0.33445
Reaction	Tumour lysis syndrome	4	9.34406	3.51027	24.8732	0.00099	0.33445
Reaction	Staphylococcal sepsis	4	9.2499	3.47492	24.6224	0.00103	0.33445
Reaction	Gastric cancer	4	8.27774	3.10993	22.033	0.00155	0.33445
Reaction	Blood glucose increased	4	0.275	0.10338	0.73154	0.00217	0.33445
Reaction	Polyneuropathy	4	7.21638	2.71139	19.2064	0.00253	0.33445
Reaction	Skin infection	4	6.9218	2.60076	18.422	0.00294	0.33445
Reaction	Colonic polyp	4	6.26087	2.35255	16.6622	0.00418	0.33445
Reaction	Spinal osteoarthritis	4	5.26319	1.97781	14.006	0.00762	0.33445
Reaction	Aspiration	4	5.0833	1.91023	13.5271	0.00857	0.33445
Reaction	Hypotonia	4	4.78627	1.79865	12.7364	0.0105	0.33445
Reaction	Ileus	4	4.39512	1.65171	11.6952	0.01394	0.33445
Reaction	Mass	4	4.22358	1.58726	11.2386	0.01588	0.33445
Reaction	Hepatitis C	4	3.70253	1.3915	9.85176	0.02427	0.33445
Reaction	Pulmonary fibrosis	4	3.45461	1.29835	9.19191	0.03018	0.33445
Reaction	Haemodialysis	4	3.41167	1.28222	9.07762	0.03138	0.33445
Reaction	Leukocytosis	4	3.03307	1.13996	8.07003	0.04493	0.33445
Reaction	Injection site erythema	4	0.39416	0.14817	1.04853	0.05591	0.33445
Reaction	Pericardial effusion	4	2.66106	1.00017	7.08004	0.06595	0.33445
Reaction	Drug effect decreased	4	0.41228	0.15498	1.09675	0.07338	0.33445
Reaction	Blood pressure increased	4	0.41216	0.15494	1.09642	0.0734	0.33445
Reaction	Vision blurred	4	0.43189	0.16235	1.1489	0.09601	0.33445
Reaction	Viral infection	4	1.9041	0.7157	5.06579	0.16139	0.33445
Reaction	Inflammation	4	1.5599	0.58634	4.14995	0.33292	0.33445
Reaction	Osteoarthritis	4	1.45942	0.54858	3.8826	0.35919	0.33445
Reaction	Cholelithiasis	4	1.39138	0.523	3.70157	0.38096	0.33445
Reaction	Abdominal distension	4	0.59474	0.22357	1.58213	0.43415	0.33445
Reaction	Diabetes mellitus	4	0.65012	0.24439	1.72947	0.54139	0.33445
Reaction	Cognitive disorder	4	1.37322	0.51618	3.65325	0.54539	0.33445
Reaction	Transient ischaemic attack	4	1.31489	0.49425	3.49806	0.55477	0.33445
Reaction	White blood cell count increased	4	1.2371	0.46502	3.2911	0.57148	0.33445
Reaction	Fluid retention	4	1.17981	0.44348	3.13867	0.58721	0.33445
Reaction	Bradycardia	4	1.10297	0.4146	2.93423	0.78825	0.33445
Reaction	Chronic obstructive pulmonary disease	4	1.05598	0.39694	2.80922	0.79468	0.33445
Reaction	Bone pain	4	1.01495	0.38152	2.70007	0.80162	0.33445
Reaction	Blood glucose decreased	4	1.01399	0.38116	2.6975	0.80179	0.33445
Reaction	Osteonecrosis	4	0.88829	0.33391	2.36309	1	0.33445
Reaction	Erythroleukaemia	3	338.405	106.23	1078.02	0	0.25084
Reaction	5q minus syndrome	3	191.98	61.0065	604.138	0	0.25084
Reaction	Gastroenteritis Escherichia coli	3	141.602	45.1887	443.722	0	0.25084
Reaction	Human herpes virus 6 serology positive	3	92.0088	29.4854	287.113	1e-05	0.25084
Reaction	Meningeal disorder	3	71.3068	22.8912	222.123	1e-05	0.25084
Reaction	Insomnia	3	0.15598	0.05038	0.48297	1e-05	0.25084
Reaction	Anxiety	3	0.1543	0.04983	0.47774	1e-05	0.25084
Reaction	Rhinovirus infection	3	47.425	15.2554	147.432	4e-05	0.25084
Reaction	Septic embolus	3	45.1718	14.5334	140.4	5e-05	0.25084
Reaction	Pulmonary sepsis	3	40.4988	13.0351	125.826	6e-05	0.25084
Reaction	Acute graft versus host disease in liver	3	40.4168	13.0088	125.571	7e-05	0.25084
Reaction	Cytomegalovirus colitis	3	36.4342	11.7309	113.159	9e-05	0.25084
Reaction	Cytomegalovirus chorioretinitis	3	34.4834	11.1046	107.082	0.0001	0.25084
Reaction	Parotitis	3	33.5562	10.8069	104.195	0.00011	0.25084
Reaction	Quadriparesis	3	31.9455	10.2895	99.1796	0.00013	0.25084
Reaction	Metastases to meninges	3	29.2327	9.41793	90.7364	0.00017	0.25084
Reaction	Upper respiratory tract inflammation	3	27.4257	8.83713	85.1147	0.0002	0.25084
Reaction	Pseudomonal sepsis	3	26.202	8.4437	81.3084	0.00023	0.25084
Reaction	Extradural haematoma	3	24.9574	8.04348	77.4381	0.00027	0.25084
Reaction	Enterocolitis infectious	3	22.0374	7.10417	68.3611	0.00038	0.25084
Reaction	Neutrophil percentage increased	3	21.8446	7.04211	67.7616	0.00039	0.25084
Reaction	Cytomegalovirus viraemia	3	21.3768	6.89159	66.308	0.00042	0.25084
Reaction	Opportunistic infection	3	20.4989	6.60906	63.5801	0.00047	0.25084
Reaction	Neutrophil count abnormal	3	19.9261	6.42469	61.8004	0.00051	0.25084
Reaction	Subileus	3	17.212	5.55088	53.3704	0.00078	0.25084
Reaction	Liver abscess	3	16.3254	5.26534	50.6174	0.0009	0.25084
Reaction	Hyporeflexia	3	15.8712	5.11904	49.2072	0.00098	0.25084
Reaction	Cerebellar syndrome	3	15.0346	4.84956	46.6101	0.00114	0.25084
Reaction	Escherichia sepsis	3	13.7034	4.42069	42.4785	0.00149	0.25084
Reaction	Computerised tomogram abnormal	3	11.97	3.86204	37.0996	0.00218	0.25084
Reaction	Oesophageal candidiasis	3	11.8492	3.82312	36.7249	0.00224	0.25084
Reaction	Cystitis haemorrhagic	3	11.7447	3.78942	36.4006	0.0023	0.25084
Reaction	Infusion site extravasation	3	10.8158	3.48999	33.519	0.0029	0.25084
Reaction	Hypoventilation	3	10.023	3.23442	31.0602	0.00358	0.25084
Reaction	Pulmonary alveolar haemorrhage	3	9.69219	3.12774	30.0341	0.00393	0.25084
Reaction	Metastatic neoplasm	3	9.12936	2.94625	28.2886	0.00463	0.25084
Reaction	Paraesthesia	3	0.2605	0.08413	0.80659	0.00688	0.25084
Reaction	Streptococcal infection	3	7.85132	2.53407	24.3258	0.007	0.25084
Reaction	Skin necrosis	3	7.694	2.48333	23.838	0.0074	0.25084
Reaction	Neurological symptom	3	7.48909	2.41723	23.2028	0.00796	0.25084
Reaction	Haemodynamic instability	3	6.9278	2.23617	21.4627	0.00982	0.25084
Reaction	Nystagmus	3	6.84702	2.21012	21.2123	0.01013	0.25084
Reaction	Hypophosphataemia	3	6.80038	2.19507	21.0678	0.01032	0.25084
Reaction	Hypovolaemia	3	5.93694	1.9165	18.3914	0.01479	0.25084
Reaction	Leukaemia	3	5.82436	1.88018	18.0425	0.01555	0.25084
Reaction	Gastrointestinal infection	3	5.78219	1.86657	17.9118	0.01585	0.25084
Reaction	Cerebral ischaemia	3	5.77718	1.86496	17.8963	0.01589	0.25084
Reaction	Cytolytic hepatitis	3	5.49874	1.77511	17.0333	0.01807	0.25084
Reaction	Hepatitis B	3	5.07393	1.63804	15.7169	0.02225	0.25084
Reaction	Urticaria	3	0.30136	0.09733	0.9331	0.02379	0.25084
Reaction	Dermatitis exfoliative	3	4.81222	1.55358	14.9059	0.02548	0.25084
Reaction	Drug hypersensitivity	3	0.31526	0.10182	0.97614	0.03197	0.25084
Reaction	Respiratory rate increased	3	4.38233	1.41485	13.5738	0.03228	0.25084
Reaction	Hepatic encephalopathy	3	4.31789	1.39405	13.3741	0.03349	0.25084
Reaction	Anuria	3	4.23186	1.36629	13.1075	0.03522	0.25084
Reaction	Prothrombin time prolonged	3	4.04168	1.30491	12.5183	0.03947	0.25084
Reaction	Intestinal perforation	3	3.80376	1.22811	11.7811	0.04579	0.25084
Reaction	Tachypnoea	3	3.71874	1.20067	11.5177	0.04837	0.25084
Reaction	Dermatitis	3	3.24649	1.04824	10.0547	0.06685	0.25084
Reaction	Liver injury	3	3.23964	1.04603	10.0335	0.06718	0.25084
Reaction	Ejection fraction decreased	3	3.12505	1.00904	9.67844	0.07306	0.25084
Reaction	Blindness unilateral	3	2.98043	0.96236	9.23045	0.08148	0.25084
Reaction	Toxic epidermal necrolysis	3	2.9531	0.95353	9.14579	0.08321	0.25084
Reaction	Agranulocytosis	3	2.93271	0.94695	9.08263	0.08453	0.25084
Reaction	Gastroenteritis	3	2.83849	0.91653	8.79074	0.09102	0.25084
Reaction	Hypocalcaemia	3	2.48983	0.80398	7.71072	0.12154	0.25084
Reaction	Dialysis	3	2.39399	0.77304	7.41388	0.13219	0.25084
Reaction	Myocardial ischaemia	3	2.3382	0.75503	7.24106	0.13896	0.25084
Reaction	Cardiomegaly	3	2.29678	0.74165	7.11276	0.14427	0.25084
Reaction	Blood sodium decreased	3	2.08761	0.67412	6.46488	0.17549	0.25084
Reaction	Cardiac arrest	3	0.44559	0.14391	1.3797	0.17619	0.25084
Reaction	Circulatory collapse	3	2.07287	0.66936	6.41923	0.178	0.25084
Reaction	Body temperature increased	3	1.9665	0.63502	6.08977	0.19756	0.25084
Reaction	Pneumonia aspiration	3	1.90861	0.61633	5.91045	0.20936	0.25084
Reaction	Fluid overload	3	1.87703	0.60613	5.81264	0.21617	0.25084
Reaction	Rash papular	3	1.82872	0.59053	5.66301	0.22714	0.25084
Reaction	Chest discomfort	3	0.46591	0.15047	1.44261	0.23228	0.25084
Reaction	Dyspepsia	3	0.45524	0.14702	1.40958	0.23499	0.25084
Reaction	Lung infection	3	1.7768	0.57377	5.50222	0.23971	0.25084
Reaction	Hepatitis	3	1.69519	0.54742	5.24945	0.26128	0.25084
Reaction	Thrombosis	3	0.52182	0.16853	1.61575	0.39619	0.25084
Reaction	Dysgeusia	3	0.51617	0.1667	1.59825	0.39825	0.25084
Reaction	Gallbladder disorder	3	1.64722	0.53193	5.10088	0.43663	0.25084
Reaction	Skin disorder	3	1.59549	0.51523	4.94067	0.44325	0.25084
Reaction	Cerebral infarction	3	1.57311	0.508	4.87137	0.44645	0.25084
Reaction	Blood potassium decreased	3	1.38671	0.44782	4.2941	0.48221	0.25084
Reaction	Urinary incontinence	3	1.36743	0.44159	4.23439	0.48696	0.25084
Reaction	Dysuria	3	1.11256	0.35929	3.44506	0.75465	0.25084
Reaction	Dysarthria	3	1.04391	0.33713	3.23249	0.76663	0.25084
Reaction	Feeling hot	3	0.68155	0.22011	2.11035	0.80797	0.25084
Reaction	Infusion related reaction	3	0.98325	0.31754	3.04463	1	0.25084
Reaction	Rectal haemorrhage	3	0.9203	0.29721	2.84969	1	0.25084
Reaction	Cataract	3	0.89892	0.2903	2.78348	1	0.25084
Reaction	Colitis herpes	2	13310.6	1207.72	146700	0	0.16722
Reaction	Splenic candidiasis	2	3327.65	610.061	18151.1	0	0.16722
Reaction	Follicle centre lymphoma, follicular grade I, II, III stage IV	2	2218.44	448.195	10980.6	0	0.16722
Reaction	Oncocytoma	2	475.379	113.37	1993.34	1e-05	0.16722
Reaction	Follicle centre lymphoma, follicular grade I, II, III	2	316.919	76.8024	1307.74	2e-05	0.16722
Reaction	Renal oncocytoma	2	316.919	76.8024	1307.74	2e-05	0.16722
Reaction	Purpura senile	2	251.144	61.2722	1029.39	3e-05	0.16722
Reaction	Occupational exposure to toxic agent	2	214.687	52.5738	876.684	5e-05	0.16722
Reaction	Thromboangiitis obliterans	2	207.978	50.9659	848.704	5e-05	0.16722
Reaction	Refractory cytopenia with multilineage dysplasia	2	170.649	41.9789	693.706	7e-05	0.16722
Reaction	Thrombophlebitis septic	2	160.369	39.4918	651.227	8e-05	0.16722
Reaction	Human polyomavirus infection	2	122.116	30.1906	493.936	0.00014	0.16722
Reaction	Weight increased	2	0.14217	0.0356	0.56783	0.00014	0.16722
Reaction	Tuberculosis of central nervous system	2	117.793	29.1349	476.239	0.00015	0.16722
Reaction	Herpes oesophagitis	2	100.838	24.985	406.976	0.0002	0.16722
Reaction	Haemosiderosis	2	78.761	19.5596	317.149	0.00032	0.16722
Reaction	Polyserositis	2	76.4978	19.002	307.963	0.00034	0.16722
Reaction	Splenic lesion	2	75.6285	18.7877	304.436	0.00035	0.16722
Reaction	Neoplasm prostate	2	72.7356	18.0745	292.703	0.00038	0.16722
Reaction	West Nile viral infection	2	72.7356	18.0745	292.703	0.00038	0.16722
Reaction	Parakeratosis	2	72.3403	17.977	291.101	0.00038	0.16722
Reaction	Bronchoalveolar lavage abnormal	2	61.6232	15.3308	247.699	0.00052	0.16722
Reaction	Skin turgor decreased	2	61.0579	15.191	245.412	0.00053	0.16722
Reaction	Paralysis flaccid	2	55.6929	13.864	223.724	0.00064	0.16722
Reaction	Hypergammaglobulinaemia benign monoclonal	2	53.8891	13.4174	216.438	0.00068	0.16722
Reaction	Bacteria stool identified	2	52.8199	13.1527	212.12	0.00071	0.16722
Reaction	Blood lactate dehydrogenase abnormal	2	50.9985	12.7015	204.767	0.00076	0.16722
Reaction	Coronary artery insufficiency	2	46.7039	11.6371	187.439	0.0009	0.16722
Reaction	Pneumococcal sepsis	2	45.2742	11.2826	181.675	0.00096	0.16722
Reaction	Chronic myelomonocytic leukaemia	2	43.2163	10.772	173.38	0.00105	0.16722
Reaction	Gingival hypertrophy	2	41.0821	10.2423	164.781	0.00116	0.16722
Reaction	Subcutaneous nodule	2	40.5811	10.118	162.763	0.00118	0.16722
Reaction	Caustic injury	2	33.9556	8.47187	136.096	0.00168	0.16722
Reaction	Arachnoiditis	2	31.2456	7.79791	125.198	0.00197	0.16722
Reaction	Obstructive uropathy	2	30.8116	7.68995	123.454	0.00203	0.16722
Reaction	Central nervous system lymphoma	2	30.6696	7.65463	122.883	0.00205	0.16722
Reaction	Dyspnoea paroxysmal nocturnal	2	29.9115	7.466	119.836	0.00215	0.16722
Reaction	Central line infection	2	28.8733	7.20765	115.665	0.0023	0.16722
Reaction	Mucosal haemorrhage	2	26.0482	6.50431	104.316	0.00281	0.16722
Reaction	Laryngeal cancer	2	25.8961	6.46645	103.706	0.00285	0.16722
Reaction	Injection site ulcer	2	25.5482	6.3798	102.309	0.00292	0.16722
Reaction	Carotid arteriosclerosis	2	25.4505	6.35547	101.917	0.00294	0.16722
Reaction	Diffuse alveolar damage	2	22.9493	5.73237	91.8768	0.0036	0.16722
Reaction	Graft complication	2	21.7139	5.42448	86.9195	0.00401	0.16722
Reaction	Nasopharyngitis	2	0.19553	0.04896	0.78094	0.0042	0.16722
Reaction	Incorrect dose administered	2	0.19031	0.04765	0.76009	0.00445	0.16722
Reaction	Head titubation	2	19.837	4.95656	79.3909	0.00477	0.16722
Reaction	Tonsillar hypertrophy	2	19.5457	4.88393	78.2227	0.00491	0.16722
Reaction	Cancer pain	2	19.4316	4.85546	77.765	0.00496	0.16722
Reaction	BK virus infection	2	18.988	4.74486	75.9865	0.00519	0.16722
Reaction	Adenovirus infection	2	18.961	4.73811	75.8781	0.0052	0.16722
Reaction	Pneumonia klebsiella	2	18.6423	4.65864	74.6003	0.00538	0.16722
Reaction	Blood electrolytes abnormal	2	18.4357	4.60712	73.7722	0.00549	0.16722
Reaction	Arrhythmia supraventricular	2	18.4103	4.60076	73.6699	0.00551	0.16722
Reaction	Enterobacter infection	2	18.1591	4.53811	72.663	0.00566	0.16722
Reaction	Sputum culture positive	2	17.7712	4.44135	71.1079	0.00589	0.16722
Reaction	Rhonchi	2	16.9346	4.23264	67.7547	0.00647	0.16722
Reaction	Culture positive	2	16.5761	4.14319	66.3178	0.00674	0.16722
Reaction	Hepatitis C virus test	2	16.332	4.08229	65.3397	0.00693	0.16722
Reaction	Vertigo positional	2	16.1537	4.03778	64.6248	0.00708	0.16722
Reaction	Lymphadenopathy mediastinal	2	15.9791	3.99422	63.9254	0.00723	0.16722
Reaction	Pyelonephritis acute	2	15.3172	3.82902	61.273	0.00784	0.16722
Reaction	Metastases to peritoneum	2	15.1948	3.79847	60.7826	0.00796	0.16722
Reaction	Mucosal dryness	2	15.0402	3.7599	60.1635	0.00811	0.16722
Reaction	Hyperhidrosis	2	0.21006	0.05259	0.83896	0.00821	0.16722
Reaction	Loss of consciousness	2	0.20774	0.05201	0.8297	0.00839	0.16722
Reaction	Platelet disorder	2	14.236	3.55914	56.9414	0.00901	0.16722
Reaction	Lichen planus	2	13.5133	3.37872	54.0469	0.00995	0.16722
Reaction	Neutrophilia	2	13.1658	3.29195	52.6551	0.01045	0.16722
Reaction	Anaemia macrocytic	2	13.1139	3.279	52.4473	0.01053	0.16722
Reaction	Pneumonia viral	2	13.0114	3.25339	52.0366	0.01069	0.16722
Reaction	Diabetes insipidus	2	12.9355	3.23444	51.7328	0.01081	0.16722
Reaction	Adenocarcinoma	2	12.4282	3.10777	49.7014	0.01166	0.16722
Reaction	Recurrent cancer	2	11.7378	2.93532	46.9368	0.01299	0.16722
Reaction	Auricular swelling	2	11.6555	2.91479	46.6076	0.01316	0.16722
Reaction	Cervix carcinoma	2	11.2706	2.81864	45.0667	0.01402	0.16722
Reaction	Iatrogenic injury	2	11.2137	2.80441	44.8387	0.01416	0.16722
Reaction	Oral fungal infection	2	9.88167	2.47164	39.5071	0.01794	0.16722
Reaction	Hypogammaglobulinaemia	2	9.58978	2.3987	38.339	0.01897	0.16722
Reaction	Hepatosplenomegaly	2	9.1419	2.28678	36.5467	0.02074	0.16722
Reaction	Retroperitoneal haemorrhage	2	8.5709	2.14408	34.262	0.02336	0.16722
Reaction	Nuclear magnetic resonance imaging brain abnormal	2	8.49975	2.1263	33.9773	0.02373	0.16722
Reaction	Respiratory syncytial virus infection	2	8.36094	2.0916	33.4219	0.02446	0.16722
Reaction	Pneumonia primary atypical	2	8.31394	2.07985	33.2339	0.02471	0.16722
Reaction	Left ventricular failure	2	8.14105	2.03664	32.5422	0.02569	0.16722
Reaction	Uterine cancer	2	8.04267	2.01205	32.1486	0.02627	0.16722
Reaction	Hodgkin's disease	2	7.9752	1.99518	31.8787	0.02668	0.16722
Reaction	Ventricular dysfunction	2	7.65858	1.91604	30.6121	0.02873	0.16722
Reaction	Chronic lymphocytic leukaemia	2	7.61913	1.90617	30.4542	0.029	0.16722
Reaction	Staphylococcal bacteraemia	2	7.42365	1.85731	29.6723	0.03041	0.16722
Reaction	Embolic stroke	2	7.27356	1.81978	29.0719	0.03156	0.16722
Reaction	Diverticulum intestinal	2	7.05011	1.76392	28.1782	0.03341	0.16722
Reaction	Blood chloride decreased	2	6.88243	1.722	27.5075	0.03489	0.16722
Reaction	Escherichia urinary tract infection	2	6.55372	1.63981	26.1928	0.03812	0.16722
Reaction	Hyperuricaemia	2	6.46774	1.61831	25.849	0.03903	0.16722
Reaction	Carotid artery occlusion	2	6.4427	1.61205	25.7488	0.03931	0.16722
Reaction	Azotaemia	2	6.29939	1.57622	25.1757	0.04093	0.16722
Reaction	Demyelination	2	6.22864	1.55853	24.8928	0.04176	0.16722
Reaction	Oesophageal disorder	2	6.10579	1.5278	24.4015	0.04328	0.16722
Reaction	Thrombotic thrombocytopenic purpura	2	5.90271	1.47702	23.5894	0.04597	0.16722
Reaction	Haemoglobin abnormal	2	5.78471	1.44751	23.1175	0.04765	0.16722
Reaction	Peripheral sensory neuropathy	2	5.71271	1.42951	22.8296	0.04872	0.16722
Reaction	General physical condition abnormal	2	5.42847	1.35842	21.6931	0.05332	0.16722
Reaction	Purulent discharge	2	5.39984	1.35126	21.5786	0.05382	0.16722
Reaction	Hyperkeratosis	2	5.31786	1.33076	21.2508	0.05528	0.16722
Reaction	Periorbital oedema	2	5.23422	1.30984	20.9164	0.05684	0.16722
Reaction	Ventricular hypertrophy	2	5.13725	1.28558	20.5287	0.05874	0.16722
Reaction	Performance status decreased	2	5.08039	1.27136	20.3013	0.05989	0.16722
Reaction	Herpes virus infection	2	5.00023	1.25131	19.9809	0.06157	0.16722
Reaction	Inguinal hernia	2	4.83846	1.21085	19.3341	0.06519	0.16722
Reaction	Aortic valve incompetence	2	4.83144	1.20909	19.306	0.06536	0.16722
Reaction	Troponin increased	2	4.63461	1.15986	18.5192	0.07023	0.16722
Reaction	Metabolic disorder	2	4.45618	1.11523	17.8058	0.07512	0.16722
Reaction	Metastasis	2	4.367	1.09292	17.4493	0.07777	0.16722
Reaction	Nail disorder	2	4.26349	1.06702	17.0355	0.08101	0.16722
Reaction	Failure to thrive	2	4.14274	1.03682	16.5528	0.08505	0.16722
Reaction	Gastric ulcer haemorrhage	2	4.10315	1.02691	16.3946	0.08644	0.16722
Reaction	Renal cancer	2	4.05688	1.01534	16.2096	0.08811	0.16722
Reaction	Dermatitis bullous	2	3.98164	0.99651	15.9089	0.09093	0.16722
Reaction	Agitation	2	0.32451	0.08125	1.29609	0.10389	0.16722
Reaction	Joint swelling	2	0.32161	0.08052	1.28451	0.1043	0.16722
Reaction	Medical device complication	2	0.32082	0.08033	1.28138	0.10444	0.16722
Reaction	Activated partial thromboplastin time prolonged	2	3.58777	0.89797	14.3346	0.10812	0.16722
Reaction	Pericarditis	2	3.50833	0.8781	14.0171	0.11217	0.16722
Reaction	Urosepsis	2	3.42792	0.85798	13.6957	0.11651	0.16722
Reaction	Haemorrhagic stroke	2	3.15792	0.79042	12.6166	0.13302	0.16722
Reaction	Renal tubular necrosis	2	3.08831	0.77301	12.3384	0.13784	0.16722
Reaction	Pulmonary haemorrhage	2	3.08402	0.77193	12.3212	0.13814	0.16722
Reaction	Metastases to lung	2	3.06838	0.76802	12.2587	0.13927	0.16722
Reaction	Dry throat	2	3.048	0.76292	12.1773	0.14075	0.16722
Reaction	Inappropriate antidiuretic hormone secretion	2	3.04521	0.76222	12.1661	0.14095	0.16722
Reaction	Electrocardiogram abnormal	2	2.96384	0.74186	11.841	0.14712	0.16722
Reaction	Neurotoxicity	2	2.95923	0.74071	11.8225	0.14748	0.16722
Reaction	Subarachnoid haemorrhage	2	2.90815	0.72793	11.6184	0.15158	0.16722
Reaction	Arteriosclerosis coronary artery	2	2.83869	0.71054	11.3408	0.15742	0.16722
Reaction	Haemolytic anaemia	2	2.82663	0.70753	11.2926	0.15847	0.16722
Reaction	Tricuspid valve incompetence	2	2.78698	0.69761	11.1342	0.16198	0.16722
Reaction	Erythema multiforme	2	2.77189	0.69383	11.0739	0.16335	0.16722
Reaction	Acute coronary syndrome	2	2.75354	0.68924	11.0005	0.16504	0.16722
Reaction	Bladder disorder	2	2.74672	0.68753	10.9733	0.16567	0.16722
Reaction	Pulmonary mass	2	2.73038	0.68344	10.908	0.16721	0.16722
Reaction	Blood albumin decreased	2	2.71867	0.68051	10.8612	0.16832	0.16722
Reaction	Incontinence	2	2.59163	0.64872	10.3535	0.18111	0.16722
Reaction	Nodule	2	2.54797	0.6378	10.1791	0.18584	0.16722
Reaction	Influenza	2	0.36325	0.09095	1.45085	0.19312	0.16722
Reaction	Oral candidiasis	2	2.45674	0.61496	9.8145	0.19632	0.16722
Reaction	Blood calcium decreased	2	2.45312	0.61406	9.80002	0.19675	0.16722
Reaction	Acute hepatic failure	2	2.45176	0.61372	9.79461	0.19691	0.16722
Reaction	Skin reaction	2	2.40829	0.60284	9.62089	0.20224	0.16722
Reaction	Myoclonus	2	2.3697	0.59318	9.4667	0.20714	0.16722
Reaction	Oesophagitis	2	2.30607	0.57726	9.21242	0.21561	0.16722
Reaction	Atelectasis	2	2.14583	0.53716	8.57218	0.23931	0.16722
Reaction	Ventricular fibrillation	2	2.11447	0.52931	8.44687	0.24438	0.16722
Reaction	Burning sensation	2	0.39925	0.09996	1.59464	0.25721	0.16722
Reaction	Cholecystitis	2	2.03029	0.50824	8.11052	0.25881	0.16722
Reaction	Hiatus hernia	2	1.88136	0.47096	7.51544	0.28749	0.16722
Reaction	Sudden death	2	1.8554	0.46447	7.41171	0.29295	0.16722
Reaction	Sinus tachycardia	2	1.7905	0.44823	7.15244	0.30726	0.16722
Reaction	Orthostatic hypotension	2	1.77144	0.44345	7.07628	0.31166	0.16722
Reaction	Central nervous system lesion	2	1.76393	0.44157	7.04626	0.31341	0.16722
Reaction	Lethargy	2	0.45423	0.11372	1.81422	0.34058	0.16722
Reaction	Swelling face	2	0.44927	0.11248	1.79444	0.34096	0.16722
Reaction	Cardiomyopathy	2	1.63863	0.41021	6.54566	0.34487	0.16722
Reaction	Musculoskeletal pain	2	0.41954	0.10504	1.67566	0.34938	0.16722
Reaction	Blood potassium increased	2	1.61399	0.40405	6.44723	0.35157	0.16722
Reaction	Disseminated intravascular coagulation	2	1.58121	0.39584	6.31624	0.36077	0.16722
Reaction	Rib fracture	2	1.50114	0.3758	5.99635	0.38469	0.16722
Reaction	Neuralgia	2	1.47814	0.37004	5.90445	0.39197	0.16722
Reaction	Eating disorder	2	1.47111	0.36828	5.87638	0.39423	0.16722
Reaction	Hepatic steatosis	2	1.4421	0.36102	5.76049	0.40374	0.16722
Reaction	Drug intolerance	2	0.57737	0.14455	2.30609	0.59476	0.16722
Reaction	Neck pain	2	0.53946	0.13506	2.15467	0.59783	0.16722
Reaction	Flatulence	2	0.53204	0.13321	2.12504	0.59922	0.16722
Reaction	Therapeutic response decreased	2	0.51524	0.129	2.05792	0.60347	0.16722
Reaction	Gastric ulcer	2	1.36003	0.34048	5.4326	0.66195	0.16722
Reaction	Laboratory test abnormal	2	1.29582	0.3244	5.17606	0.67015	0.16722
Reaction	Pulmonary hypertension	2	1.25147	0.3133	4.9989	0.67665	0.16722
Reaction	Hypoacusis	2	1.25053	0.31307	4.99514	0.67679	0.16722
Reaction	Intervertebral disc protrusion	2	1.17171	0.29334	4.68027	0.69026	0.16722
Reaction	Renal failure chronic	2	1.07988	0.27035	4.31343	0.70935	0.16722
Reaction	Throat tightness	2	1.0711	0.26815	4.27837	0.71139	0.16722
Reaction	Haematemesis	2	1.02271	0.25604	4.08506	0.72331	0.16722
Reaction	Eye disorder	2	1.00321	0.25116	4.00715	0.72846	0.16722
Reaction	Renal disorder	2	0.66507	0.16651	2.65639	0.77566	0.16722
Reaction	Anaphylactic reaction	2	0.6474	0.16209	2.58584	0.77595	0.16722
Reaction	Rash generalised	2	0.64219	0.16078	2.56501	0.77614	0.16722
Reaction	Rhabdomyolysis	2	0.63812	0.15976	2.54877	0.77631	0.16722
Reaction	Liver function test abnormal	2	0.6352	0.15903	2.5371	0.77646	0.16722
Reaction	Nervous system disorder	2	0.63083	0.15794	2.51966	0.77671	0.16722
Reaction	Disorientation	2	0.60232	0.1508	2.40575	0.77923	0.16722
Reaction	Haematoma	2	0.99504	0.24911	3.9745	1	0.16722
Reaction	Heart rate decreased	2	0.96692	0.24207	3.86217	1	0.16722
Reaction	Respiratory disorder	2	0.96433	0.24143	3.85182	1	0.16722
Reaction	Impaired healing	2	0.89237	0.22341	3.56438	1	0.16722
Reaction	Productive cough	2	0.88126	0.22063	3.52001	1	0.16722
Reaction	Breast cancer female	2	0.86641	0.21691	3.46066	1	0.16722
Reaction	Angina pectoris	2	0.80189	0.20076	3.20295	1	0.16722
Reaction	Blindness	2	0.79699	0.19954	3.18339	1	0.16722
Reaction	Hyperglycaemia	2	0.74386	0.18623	2.97113	1	0.16722
Reaction	Oxygen saturation decreased	2	0.73755	0.18466	2.94594	1	0.16722
Reaction	Blood creatine phosphokinase increased	2	0.72971	0.18269	2.91461	1	0.16722
Reaction	Respiratory arrest	2	0.71043	0.17787	2.8376	1	0.16722
Reaction	Emotional disorder	2	0.70688	0.17698	2.82343	1	0.16722
Reaction	Pollakiuria	2	0.7064	0.17686	2.82149	1	0.16722
Reaction	Wheezing	2	0.69514	0.17404	2.77654	1	0.16722
Reaction	Depressed level of consciousness	2	0.69416	0.17379	2.77263	1	0.16722
Reaction	Product quality issue	1	0.06099	0.0086	0.43261	0	0.08361
Reaction	Feeling abnormal	1	0.05865	0.00827	0.41602	0	0.08361
Reaction	Somnolence	1	0.07538	0.01063	0.5347	4e-05	0.08361
Reaction	Convulsion	1	0.07789	0.01098	0.55255	6e-05	0.08361
Reaction	Muscle spasms	1	0.07778	0.01096	0.55174	6e-05	0.08361
Reaction	Myalgia	1	0.08508	0.01199	0.60352	0.00018	0.08361
Reaction	Human anti-mouse antibody increased	1	6655.31	416.502	106346	0.0003	0.08361
Reaction	Extranodal marginal zone B-cell lymphoma (MALT type) recurrent	1	2218.44	230.916	21312.7	0.0006	0.08361
Reaction	Follicle centre lymphoma, follicular grade I, II, III refractory	1	1331.06	155.619	11385	0.0009	0.08361
Reaction	Thymoma malignant recurrent	1	1109.22	133.637	9206.76	0.00105	0.08361
Reaction	Capnocytophagia infection	1	950.758	117.061	7721.94	0.0012	0.08361
Reaction	Superinfection viral	1	950.758	117.061	7721.94	0.0012	0.08361
Reaction	Human anti-mouse antibody positive	1	739.478	93.7565	5832.43	0.0015	0.08361
Reaction	Burkitt's lymphoma stage IV	1	665.531	85.2596	5195.09	0.00165	0.08361
Reaction	Cell-mediated cytotoxicity	1	554.609	72.1695	4262.06	0.00195	0.08361
Reaction	Burkitt's lymphoma recurrent	1	511.947	67.0221	3910.49	0.0021	0.08361
Reaction	Follicle centre lymphoma, follicular grade I, II, III recurrent	1	415.957	55.205	3134.13	0.00255	0.08361
Reaction	Hepatic artery embolism	1	415.957	55.205	3134.13	0.00255	0.08361
Reaction	Lung infiltration malignant	1	415.957	55.205	3134.13	0.00255	0.08361
Reaction	Splenic marginal zone lymphoma	1	415.957	55.205	3134.13	0.00255	0.08361
Reaction	Bacteroides bacteraemia	1	391.489	52.1399	2939.47	0.0027	0.08361
Reaction	Iodine uptake increased	1	391.489	52.1399	2939.47	0.0027	0.08361
Reaction	Leukaemia monocytic	1	369.739	49.3969	2767.53	0.00285	0.08361
Reaction	Injury	1	0.11625	0.01639	0.82462	0.00314	0.08361
Reaction	Flushing	1	0.11406	0.01608	0.80907	0.00323	0.08361
Reaction	B-cell lymphoma stage I	1	289.361	39.1078	2141	0.0036	0.08361
Reaction	B-cell lymphoma stage III	1	289.361	39.1078	2141	0.0036	0.08361
Reaction	Cervix carcinoma stage I	1	266.212	36.0996	1963.15	0.0039	0.08361
Reaction	White blood cell morphology abnormal	1	266.212	36.0996	1963.15	0.0039	0.08361
Reaction	Perihepatic abscess	1	255.973	34.7626	1884.85	0.00405	0.08361
Reaction	Tonsillar neoplasm	1	255.973	34.7626	1884.85	0.00405	0.08361
Reaction	Haemorrhagic tumour necrosis	1	237.69	32.365	1745.6	0.00435	0.08361
Reaction	Fungus stool identified	1	229.493	31.2861	1683.41	0.0045	0.08361
Reaction	Bone marrow leukaemic cell infiltration	1	214.687	29.3305	1571.42	0.0048	0.08361
Reaction	Pharyngoesophageal diverticulum	1	207.978	28.4416	1520.84	0.00495	0.08361
Reaction	Malignant neoplasm of eyelid	1	201.676	27.6049	1473.4	0.0051	0.08361
Reaction	Gastritis fungal	1	195.744	26.8161	1428.84	0.00524	0.08361
Reaction	Radiation fibrosis - lung	1	195.744	26.8161	1428.84	0.00524	0.08361
Reaction	Metastases to gallbladder	1	190.152	26.0711	1386.89	0.00539	0.08361
Reaction	Autologous bone marrow transplantation therapy	1	179.873	24.6987	1309.96	0.00569	0.08361
Reaction	Cholangiolitis	1	166.383	22.8912	1209.34	0.00614	0.08361
Reaction	Infusion site ulcer	1	166.383	22.8912	1209.34	0.00614	0.08361
Reaction	B-cell lymphoma stage IV	1	162.325	22.346	1179.15	0.00629	0.08361
Reaction	Refractory anaemia with ringed sideroblasts	1	158.46	21.8263	1150.42	0.00644	0.08361
Reaction	Gallbladder cancer metastatic	1	151.257	20.856	1096.98	0.00674	0.08361
Reaction	Ureaplasma infection	1	151.257	20.856	1096.98	0.00674	0.08361
Reaction	Dacryocanaliculitis	1	141.602	19.5523	1025.52	0.00719	0.08361
Reaction	Splenic neoplasm malignancy unspecified	1	135.823	18.77	982.831	0.00748	0.08361
Reaction	Mesenteric artery stenosis	1	130.496	18.048	943.555	0.00778	0.08361
Reaction	Delayed engraftment	1	125.572	17.3794	907.297	0.00808	0.08361
Reaction	Pneumonia adenoviral	1	125.572	17.3794	907.297	0.00808	0.08361
Reaction	Allogenic bone marrow transplantation therapy	1	121.006	16.7586	873.722	0.00838	0.08361
Reaction	Haemodilution	1	116.76	16.1806	842.542	0.00868	0.08361
Reaction	Mucosal necrosis	1	116.76	16.1806	842.542	0.00868	0.08361
Reaction	Karyotype analysis abnormal	1	100.838	14.0067	725.959	0.01002	0.08361
Reaction	Abdominal wall infection	1	99.3329	13.8007	714.967	0.01016	0.08361
Reaction	Implant site warmth	1	95.0758	13.2174	683.899	0.01061	0.08361
Reaction	Resection of rectum	1	92.4348	12.8553	664.645	0.01091	0.08361
Reaction	Gamma-glutamyltransferase	1	91.1686	12.6815	655.419	0.01106	0.08361
Reaction	Virus serology test positive	1	91.1686	12.6815	655.419	0.01106	0.08361
Reaction	Anti-erythrocyte antibody positive	1	88.7374	12.3477	637.715	0.01135	0.08361
Reaction	Subacute endocarditis	1	87.5698	12.1874	629.216	0.0115	0.08361
Reaction	Basophil count decreased	1	86.4326	12.0311	620.941	0.01165	0.08361
Reaction	Cystitis bacterial	1	84.2444	11.7302	605.027	0.01195	0.08361
Reaction	Cytomegalovirus enteritis	1	81.1623	11.3062	582.629	0.01239	0.08361
Reaction	Splenic granuloma	1	79.2298	11.0401	568.596	0.01269	0.08361
Reaction	Visual impairment	1	0.14209	0.02003	1.00793	0.01278	0.08361
Reaction	Rash papulosquamous	1	78.2977	10.9117	561.83	0.01284	0.08361
Reaction	B-cell small lymphocytic lymphoma	1	77.3873	10.7863	555.223	0.01299	0.08361
Reaction	Intestinal adenocarcinoma	1	76.4978	10.6637	548.77	0.01313	0.08361
Reaction	Athetosis	1	73.1352	10.2	524.39	0.01373	0.08361
Reaction	Acinetobacter bacteraemia	1	72.3403	10.0903	518.629	0.01388	0.08361
Reaction	Gastroenteritis cryptosporidial	1	71.5624	9.98292	512.994	0.01402	0.08361
Reaction	Morganella infection	1	68.6114	9.5754	491.627	0.01462	0.08361
Reaction	Scan abdomen abnormal	1	68.6114	9.5754	491.627	0.01462	0.08361
Reaction	Deep vein thrombosis postoperative	1	67.9113	9.47866	486.561	0.01476	0.08361
Reaction	Granulocytes abnormal	1	67.2253	9.38386	481.597	0.01491	0.08361
Reaction	Nasal cavity cancer	1	67.2253	9.38386	481.597	0.01491	0.08361
Reaction	Metastatic bronchial carcinoma	1	64.6146	9.02289	462.717	0.0155	0.08361
Reaction	Oesophageal neoplasm	1	63.9933	8.93695	458.226	0.01565	0.08361
Reaction	Carcinoma in situ of skin	1	63.3839	8.85262	453.822	0.0158	0.08361
Reaction	Bronchopulmonary aspergillosis allergic	1	62.1991	8.68866	445.262	0.0161	0.08361
Reaction	Metastases to neck	1	62.1991	8.68866	445.262	0.0161	0.08361
Reaction	Sodium retention	1	59.4224	8.30416	425.211	0.01683	0.08361
Reaction	Myopericarditis	1	57.3733	8.02022	410.425	0.01743	0.08361
Reaction	Blood alkaline phosphatase	1	56.883	7.95224	406.888	0.01757	0.08361
Reaction	Ultrasound kidney abnormal	1	56.4009	7.88541	403.411	0.01772	0.08361
Reaction	Influenza like illness	1	0.14962	0.02109	1.06136	0.01818	0.08361
Reaction	Completed suicide	1	0.14922	0.02104	1.05851	0.01822	0.08361
Reaction	Parophthalmia	1	54.1082	7.56741	386.882	0.01846	0.08361
Reaction	Parapsoriasis	1	53.2424	7.44727	380.644	0.01875	0.08361
Reaction	Essential thrombocythaemia	1	52.404	7.3309	374.603	0.01905	0.08361
Reaction	Leukaemoid reaction	1	51.5915	7.2181	368.752	0.01934	0.08361
Reaction	Renal hypertrophy	1	50.419	7.05527	360.309	0.01978	0.08361
Reaction	Bone marrow transplant rejection	1	50.0399	7.00261	357.58	0.01993	0.08361
Reaction	Giardiasis	1	45.8987	6.42699	327.788	0.0217	0.08361
Reaction	Hepatitis B virus test	1	45.5843	6.38326	325.528	0.02184	0.08361
Reaction	Intestinal anastomosis	1	45.5843	6.38326	325.528	0.02184	0.08361
Reaction	Metastases to gastrointestinal tract	1	44.0749	6.17326	314.679	0.02258	0.08361
Reaction	Ureteric dilatation	1	43.7849	6.13291	312.595	0.02273	0.08361
Reaction	Right ventricular systolic pressure increased	1	43.2163	6.05377	308.51	0.02302	0.08361
Reaction	Diffuse large B-cell lymphoma recurrent	1	42.3905	5.93881	302.578	0.02346	0.08361
Reaction	Engraft failure	1	42.1222	5.90146	300.651	0.02361	0.08361
Reaction	Creutzfeldt-Jakob disease	1	40.5811	5.68684	289.586	0.02449	0.08361
Reaction	Clostridium difficile toxin test positive	1	40.3352	5.65257	287.821	0.02463	0.08361
Reaction	Injection site thrombosis	1	40.0922	5.61872	286.077	0.02478	0.08361
Reaction	Reiter's syndrome	1	39.8521	5.58527	284.353	0.02493	0.08361
Reaction	Metastases to the mediastinum	1	39.6149	5.55222	282.651	0.02507	0.08361
Reaction	Viral rash	1	39.6149	5.55222	282.651	0.02507	0.08361
Reaction	Hospitalisation	1	0.16141	0.02275	1.145	0.02554	0.08361
Reaction	Acute interstitial pneumonitis	1	38.2489	5.36184	272.85	0.02595	0.08361
Reaction	Decreased vibratory sense	1	37.6006	5.27147	268.2	0.02639	0.08361
Reaction	Catheter thrombosis	1	37.1805	5.21289	265.187	0.02668	0.08361
Reaction	Respiratory tract inflammation	1	36.9739	5.18409	263.705	0.02683	0.08361
Reaction	Oral lichen planus	1	35.7812	5.01774	255.154	0.02771	0.08361
Reaction	Fungal test positive	1	35.5899	4.99104	253.782	0.02785	0.08361
Reaction	Hypermetabolism	1	34.8445	4.88705	248.44	0.02844	0.08361
Reaction	Corynebacterium infection	1	34.663	4.86173	247.14	0.02858	0.08361
Reaction	Blast cells present	1	34.4834	4.83667	245.853	0.02873	0.08361
Reaction	Blood immunoglobulin A decreased	1	34.3057	4.81186	244.579	0.02887	0.08361
Reaction	Lymphocytic leukaemia	1	33.6127	4.71513	239.614	0.02946	0.08361
Reaction	Shift to the left	1	32.1512	4.5111	229.147	0.03077	0.08361
Reaction	Anastomotic complication	1	31.6919	4.44695	225.858	0.0312	0.08361
Reaction	Biopsy skin abnormal	1	31.5417	4.42597	224.782	0.03135	0.08361
Reaction	Mediastinal disorder	1	31.5417	4.42597	224.782	0.03135	0.08361
Reaction	Mononucleosis syndrome	1	31.2456	4.38461	222.662	0.03164	0.08361
Reaction	Retroperitoneal lymphadenopathy	1	31.2456	4.38461	222.662	0.03164	0.08361
Reaction	Acute left ventricular failure	1	30.9549	4.344	220.581	0.03193	0.08361
Reaction	Carbohydrate antigen 19-9 increased	1	30.5289	4.28449	217.532	0.03237	0.08361
Reaction	Cytomegalovirus antigen positive	1	30.3895	4.26502	216.535	0.03251	0.08361
Reaction	Burkitt's lymphoma	1	30.2514	4.24572	215.546	0.03266	0.08361
Reaction	Vasoplegia syndrome	1	29.8444	4.18885	212.633	0.0331	0.08361
Reaction	Injection site exfoliation	1	29.7112	4.17023	211.68	0.03324	0.08361
Reaction	Treatment related secondary malignancy	1	29.5791	4.15178	210.735	0.03339	0.08361
Reaction	Pneumatosis	1	29.3185	4.11536	208.87	0.03368	0.08361
Reaction	Genital discomfort	1	28.8108	4.0444	205.238	0.03426	0.08361
Reaction	Pseudomonal bacteraemia	1	28.4415	3.99276	202.596	0.03469	0.08361
Reaction	Amyotrophy	1	27.1645	3.81421	193.464	0.03629	0.08361
Reaction	Legionella infection	1	26.8359	3.76825	191.114	0.03672	0.08361
Reaction	Salivary gland disorder	1	26.8359	3.76825	191.114	0.03672	0.08361
Reaction	Exercise lack of	1	26.3056	3.69407	187.323	0.03744	0.08361
Reaction	Arteriovenous fistula	1	26.202	3.67958	186.582	0.03759	0.08361
Reaction	Arthritis reactive	1	25.6962	3.60882	182.967	0.03831	0.08361
Reaction	Anal sphincter atony	1	25.5973	3.59499	182.26	0.03846	0.08361
Reaction	Genital ulceration	1	25.4993	3.58127	181.559	0.0386	0.08361
Reaction	Electrocardiogram ST-T segment abnormal	1	25.4019	3.56765	180.864	0.03874	0.08361
Reaction	Pneumococcal infection	1	25.2095	3.54072	179.488	0.03903	0.08361
Reaction	Respiratory tract infection fungal	1	25.02	3.5142	178.134	0.03932	0.08361
Reaction	Pulmonary veno-occlusive disease	1	23.769	3.3391	169.196	0.04134	0.08361
Reaction	Acute lung injury	1	22.7921	3.20234	162.22	0.04307	0.08361
Reaction	Malignant peritoneal neoplasm	1	22.5604	3.16988	160.564	0.0435	0.08361
Reaction	Diarrhoea infectious	1	22.3332	3.13807	158.943	0.04393	0.08361
Reaction	Post procedural discharge	1	21.9647	3.08646	156.311	0.04465	0.08361
Reaction	Haematoma infection	1	21.8207	3.06628	155.283	0.04493	0.08361
Reaction	Proctitis ulcerative	1	21.6785	3.04637	154.268	0.04522	0.08361
Reaction	Alanine aminotransferase decreased	1	20.7978	2.92299	147.982	0.04708	0.08361
Reaction	Embolic cerebral infarction	1	20.733	2.91391	147.52	0.04723	0.08361
Reaction	Proteus infection	1	20.6047	2.89592	146.603	0.04751	0.08361
Reaction	Intravascular haemolysis	1	20.3526	2.86061	144.805	0.04809	0.08361
Reaction	Pseudolymphoma	1	20.3526	2.86061	144.805	0.04809	0.08361
Reaction	Ultrasound scan abnormal	1	20.2906	2.85191	144.362	0.04823	0.08361
Reaction	Blood alkaline phosphatase abnormal	1	20.0461	2.81765	142.617	0.0488	0.08361
Reaction	Graft dysfunction	1	19.4032	2.72755	138.031	0.05037	0.08361
Reaction	Bacillus infection	1	19.3468	2.71964	137.628	0.05052	0.08361
Reaction	Platelet transfusion	1	19.1796	2.69619	136.435	0.05094	0.08361
Reaction	Dry mouth	1	0.18198	0.02565	1.2909	0.05124	0.08361
Reaction	Parainfluenzae virus infection	1	19.0152	2.67315	135.262	0.05137	0.08361
Reaction	Toxic shock syndrome	1	18.3342	2.57767	130.405	0.05322	0.08361
Reaction	Neutrophil percentage decreased	1	18.2838	2.57061	130.046	0.05336	0.08361
Reaction	Hypertrophy	1	18.0361	2.53587	128.279	0.05407	0.08361
Reaction	Metastases to adrenals	1	17.7003	2.48878	125.885	0.05507	0.08361
Reaction	Catheter site related reaction	1	17.6066	2.47565	125.217	0.05535	0.08361
Reaction	Pleural disorder	1	17.6066	2.47565	125.217	0.05535	0.08361
Reaction	Apparent life threatening event	1	17.4223	2.44979	123.902	0.05592	0.08361
Reaction	Blood urea abnormal	1	16.9778	2.38746	120.734	0.05734	0.08361
Reaction	Systemic mycosis	1	16.9346	2.3814	120.426	0.05748	0.08361
Reaction	Febrile infection	1	16.7219	2.35155	118.909	0.05819	0.08361
Reaction	Carbohydrate antigen 125 increased	1	16.6383	2.33982	118.313	0.05847	0.08361
Reaction	Hilar lymphadenopathy	1	16.5555	2.32821	117.723	0.05875	0.08361
Reaction	JC virus infection	1	16.4735	2.31671	117.139	0.05904	0.08361
Reaction	Gallbladder polyp	1	16.3521	2.29968	116.273	0.05946	0.08361
Reaction	Haemophilus infection	1	16.2721	2.28846	115.703	0.05974	0.08361
Reaction	Fungal sepsis	1	16.1145	2.26635	114.58	0.06031	0.08361
Reaction	Eschar	1	15.96	2.24466	113.479	0.06087	0.08361
Reaction	Tumour pain	1	15.8838	2.23397	112.936	0.06115	0.08361
Reaction	Bowen's disease	1	15.6965	2.20769	111.601	0.06186	0.08361
Reaction	Central nervous system infection	1	15.6595	2.2025	111.338	0.062	0.08361
Reaction	Blood magnesium increased	1	15.5498	2.1871	110.555	0.06242	0.08361
Reaction	Gallbladder enlargement	1	15.5498	2.1871	110.555	0.06242	0.08361
Reaction	Enterococcal sepsis	1	15.3702	2.1619	109.276	0.06313	0.08361
Reaction	Malignant melanoma in situ	1	15.2645	2.14706	108.522	0.06355	0.08361
Reaction	Alpha haemolytic streptococcal infection	1	14.9222	2.09903	106.084	0.06496	0.08361
Reaction	Multiple-drug resistance	1	14.8556	2.08968	105.609	0.06524	0.08361
Reaction	Nuchal rigidity	1	14.5312	2.04415	103.298	0.06664	0.08361
Reaction	Peripheral sensorimotor neuropathy	1	14.4367	2.03087	102.625	0.06706	0.08361
Reaction	Mucormycosis	1	14.4054	2.02649	102.402	0.0672	0.08361
Reaction	Refusal of treatment by relative	1	14.4054	2.02649	102.402	0.0672	0.08361
Reaction	Cytokine release syndrome	1	14.3433	2.01777	101.96	0.06748	0.08361
Reaction	Brain scan abnormal	1	14.2512	2.00484	101.303	0.0679	0.08361
Reaction	Marrow hyperplasia	1	14.1002	1.98364	100.228	0.0686	0.08361
Reaction	High density lipoprotein increased	1	13.6379	1.91873	96.9352	0.07084	0.08361
Reaction	Zygomycosis	1	13.61	1.91482	96.7366	0.07098	0.08361
Reaction	Cerebellar atrophy	1	13.5823	1.91092	96.5387	0.07112	0.08361
Reaction	Klebsiella sepsis	1	13.5823	1.91092	96.5387	0.07112	0.08361
Reaction	Mucosal erosion	1	13.527	1.90317	96.1455	0.0714	0.08361
Reaction	Medication error	1	0.20096	0.02833	1.42558	0.07161	0.08361
Reaction	Colon neoplasm	1	13.4723	1.89548	95.7555	0.07168	0.08361
Reaction	Muscle necrosis	1	13.4723	1.89548	95.7555	0.07168	0.08361
Reaction	Product contamination microbial	1	13.4451	1.89165	95.5617	0.07181	0.08361
Reaction	Asthma	1	0.19812	0.02793	1.40538	0.07183	0.08361
Reaction	Swelling	1	0.19771	0.02787	1.4025	0.07188	0.08361
Reaction	Traumatic haematoma	1	13.391	1.88406	95.1764	0.07209	0.08361
Reaction	Injection site reaction	1	0.19563	0.02758	1.38778	0.07226	0.08361
Reaction	Pulmonary mycosis	1	13.284	1.86904	94.415	0.07265	0.08361
Reaction	Radiation injury	1	13.284	1.86904	94.415	0.07265	0.08361
Reaction	Radiation pneumonitis	1	13.284	1.86904	94.415	0.07265	0.08361
Reaction	Axillary mass	1	13.2312	1.86163	94.0388	0.07293	0.08361
Reaction	Tumour necrosis	1	13.1788	1.85427	93.6657	0.07321	0.08361
Reaction	Complications of transplant surgery	1	13.101	1.84334	93.1115	0.07363	0.08361
Reaction	Cystitis noninfective	1	13.0753	1.83973	92.9282	0.07376	0.08361
Reaction	Linear IgA disease	1	13.0241	1.83254	92.5638	0.07404	0.08361
Reaction	Neutropenic colitis	1	12.9986	1.82897	92.3827	0.07418	0.08361
Reaction	Microangiopathy	1	12.8481	1.80782	91.3106	0.07502	0.08361
Reaction	Rheumatoid arthritis	1	0.18825	0.02654	1.33537	0.07508	0.08361
Reaction	Blood pH increased	1	12.7253	1.79057	90.436	0.07571	0.08361
Reaction	No reaction on previous exposure to drug	1	12.7253	1.79057	90.436	0.07571	0.08361
Reaction	Neuromyopathy	1	12.5809	1.7703	89.4083	0.07654	0.08361
Reaction	Haemorrhagic disorder	1	12.3935	1.74397	88.0739	0.07765	0.08361
Reaction	Pneumomediastinum	1	12.1669	1.71215	86.4609	0.07904	0.08361
Reaction	Waist circumference increased	1	12.1447	1.70903	86.3029	0.07918	0.08361
Reaction	Gastroenteritis norovirus	1	12.0132	1.69055	85.3665	0.08001	0.08361
Reaction	Lymphocytic infiltration	1	12.0132	1.69055	85.3665	0.08001	0.08361
Reaction	Aspartate aminotransferase abnormal	1	11.7171	1.64896	83.2588	0.08194	0.08361
Reaction	Osteochondrosis	1	11.5946	1.63175	82.387	0.08277	0.08361
Reaction	Transfusion reaction	1	11.5343	1.62328	81.9579	0.08318	0.08361
Reaction	Macrocytosis	1	11.3961	1.60386	80.9739	0.08414	0.08361
Reaction	Respiratory tract infection viral	1	11.2993	1.59026	80.2854	0.08483	0.08361
Reaction	Salmonellosis	1	11.1854	1.57425	79.4745	0.08566	0.08361
Reaction	Lip haemorrhage	1	11.1666	1.57162	79.3409	0.08579	0.08361
Reaction	Uterine prolapse	1	11.037	1.5534	78.4184	0.08676	0.08361
Reaction	Streptococcal sepsis	1	11.0005	1.54827	78.1587	0.08703	0.08361
Reaction	Staphylococcal skin infection	1	10.9283	1.53812	77.6445	0.08758	0.08361
Reaction	Gastric ulcer perforation	1	10.6315	1.49642	75.5327	0.08991	0.08361
Reaction	Cardiac hypertrophy	1	10.6145	1.49403	75.412	0.09004	0.08361
Reaction	Post herpetic neuralgia	1	10.564	1.48693	75.0523	0.09045	0.08361
Reaction	Renal atrophy	1	10.4808	1.47524	74.4605	0.09114	0.08361
Reaction	VIth nerve paralysis	1	10.4808	1.47524	74.4605	0.09114	0.08361
Reaction	Electrocardiogram ST segment abnormal	1	10.3343	1.45466	73.4183	0.09236	0.08361
Reaction	Beta haemolytic streptococcal infection	1	10.2232	1.43904	72.6277	0.09332	0.08361
Reaction	Abscess oral	1	10.0533	1.41516	71.4191	0.09482	0.08361
Reaction	Corneal abrasion	1	10.0533	1.41516	71.4191	0.09482	0.08361
Reaction	Pulmonary granuloma	1	10.0533	1.41516	71.4191	0.09482	0.08361
Reaction	Mycosis fungoides	1	9.87434	1.39	70.1457	0.09645	0.08361
Reaction	Gastrointestinal stoma complication	1	9.77284	1.37573	69.4236	0.0974	0.08361
Reaction	Radiation skin injury	1	9.74423	1.37171	69.22	0.09767	0.08361
Reaction	Dyspnoea at rest	1	9.72998	1.36971	69.1187	0.0978	0.08361
Reaction	Renal infarct	1	9.72998	1.36971	69.1187	0.0978	0.08361
Reaction	Oesophageal haemorrhage	1	9.65937	1.35978	68.6164	0.09848	0.08361
Reaction	Soft tissue disorder	1	9.64537	1.35782	68.5168	0.09862	0.08361
Reaction	Tonsillar disorder	1	9.61749	1.3539	68.3185	0.09889	0.08361
Reaction	Hallucination	1	0.21854	0.03081	1.55029	0.10062	0.08361
Reaction	Skin graft	1	9.44015	1.32897	67.057	0.10065	0.08361
Reaction	Adenocarcinoma pancreas	1	9.23066	1.29951	65.5669	0.1028	0.08361
Reaction	Pneumonia legionella	1	9.11686	1.28351	64.7574	0.10402	0.08361
Reaction	Intestinal dilatation	1	9.06717	1.27653	64.404	0.10456	0.08361
Reaction	Genital herpes	1	9.05484	1.2748	64.3163	0.10469	0.08361
Reaction	Enteritis infectious	1	8.96942	1.26278	63.7087	0.10563	0.08361
Reaction	Cell death	1	8.81497	1.24107	62.6103	0.10738	0.08361
Reaction	Ureteric obstruction	1	8.79169	1.23779	62.4447	0.10764	0.08361
Reaction	Incision site complication	1	8.74547	1.2313	62.1161	0.10818	0.08361
Reaction	Cerebral artery embolism	1	8.63204	1.21535	61.3094	0.10952	0.08361
Reaction	Intestinal fistula	1	8.52152	1.19981	60.5234	0.11086	0.08361
Reaction	Pupils unequal	1	8.52152	1.19981	60.5234	0.11086	0.08361
Reaction	Bladder transitional cell carcinoma	1	8.51062	1.19827	60.4459	0.11099	0.08361
Reaction	Mean cell volume increased	1	8.46731	1.19218	60.1379	0.11152	0.08361
Reaction	Intra-abdominal haematoma	1	8.2572	1.16264	58.6438	0.11419	0.08361
Reaction	Surgical procedure repeated	1	8.2063	1.15548	58.2818	0.11486	0.08361
Reaction	Pneumoperitoneum	1	8.13607	1.1456	57.7825	0.11579	0.08361
Reaction	Catheter site erythema	1	8.09648	1.14003	57.501	0.11632	0.08361
Reaction	Echocardiogram abnormal	1	8.08664	1.13865	57.431	0.11645	0.08361
Reaction	Biliary dilatation	1	8.07683	1.13727	57.3612	0.11658	0.08361
Reaction	Extremity necrosis	1	8.01844	1.12906	56.9461	0.11738	0.08361
Reaction	Cytomegalovirus test positive	1	7.99917	1.12635	56.809	0.11764	0.08361
Reaction	Urinary tract obstruction	1	7.92298	1.11563	56.2674	0.1187	0.08361
Reaction	Spleen disorder	1	7.82057	1.10123	55.5392	0.12016	0.08361
Reaction	Thrombocytopenic purpura	1	7.81139	1.09994	55.474	0.12029	0.08361
Reaction	Reversible posterior leukoencephalopathy syndrome	1	7.80223	1.09865	55.4089	0.12042	0.08361
Reaction	Chorea	1	7.78398	1.09608	55.2791	0.12069	0.08361
Reaction	Empyema	1	7.71183	1.08593	54.7661	0.12175	0.08361
Reaction	Lymphocyte percentage decreased	1	7.6674	1.07968	54.4502	0.1224	0.08361
Reaction	Splenic infarction	1	7.65858	1.07844	54.3875	0.12254	0.08361
Reaction	PCO2 decreased	1	7.58008	1.0674	53.8294	0.12372	0.08361
Reaction	Cervical spinal stenosis	1	7.52863	1.06016	53.4636	0.12451	0.08361
Reaction	Infusion site reaction	1	7.51163	1.05777	53.3428	0.12478	0.08361
Reaction	Hepatic congestion	1	7.45275	1.04949	52.9242	0.1257	0.08361
Reaction	Leukaemia recurrent	1	7.36206	1.03673	52.2795	0.12714	0.08361
Reaction	Exophthalmos	1	7.32963	1.03217	52.049	0.12766	0.08361
Reaction	Pneumatosis intestinalis	1	6.93984	0.97734	49.2782	0.13432	0.08361
Reaction	Pelvic venous thrombosis	1	6.91101	0.97328	49.0733	0.13484	0.08361
Reaction	Adhesion	1	6.86114	0.96627	48.7188	0.13575	0.08361
Reaction	Cerebellar infarction	1	6.69548	0.94296	47.5413	0.13886	0.08361
Reaction	Acute febrile neutrophilic dermatosis	1	6.6354	0.9345	47.1143	0.14003	0.08361
Reaction	Induration	1	6.59594	0.92895	46.8339	0.1408	0.08361
Reaction	Antibody test positive	1	6.56342	0.92438	46.6027	0.14145	0.08361
Reaction	Lip disorder	1	6.55695	0.92347	46.5567	0.14158	0.08361
Reaction	Hepatorenal syndrome	1	6.46774	0.91091	45.9227	0.14338	0.08361
Reaction	Bone marrow transplant	1	6.41785	0.90389	45.5681	0.14441	0.08361
Reaction	Pneumonia fungal	1	6.32033	0.89017	44.8751	0.14646	0.08361
Reaction	White blood cell disorder	1	6.29641	0.88681	44.7051	0.14698	0.08361
Reaction	Conduction disorder	1	6.27267	0.88347	44.5364	0.14749	0.08361
Reaction	Quadriplegia	1	6.26087	0.88181	44.4525	0.14775	0.08361
Reaction	Accidental death	1	6.10019	0.8592	43.3107	0.15132	0.08361
Reaction	Protein total increased	1	5.92109	0.83399	42.038	0.15552	0.08361
Reaction	Transplant failure	1	5.83799	0.8223	41.4475	0.15755	0.08361
Reaction	Radiculopathy	1	5.83287	0.82158	41.4111	0.15768	0.08361
Reaction	Skin swelling	1	5.7973	0.81657	41.1584	0.15856	0.08361
Reaction	Cardiac failure chronic	1	5.69804	0.8026	40.453	0.16109	0.08361
Reaction	Pharyngeal erythema	1	5.66409	0.79782	40.2118	0.16197	0.08361
Reaction	Culture urine positive	1	5.63055	0.7931	39.9735	0.16285	0.08361
Reaction	Atrophy	1	5.58331	0.78645	39.6379	0.16411	0.08361
Reaction	Abdominal mass	1	5.55535	0.78252	39.4392	0.16486	0.08361
Reaction	Paresis	1	5.52766	0.77862	39.2425	0.16561	0.08361
Reaction	Gastrointestinal tube insertion	1	5.5185	0.77733	39.1773	0.16586	0.08361
Reaction	Nosocomial infection	1	5.48213	0.77221	38.919	0.16687	0.08361
Reaction	Vascular occlusion	1	5.47762	0.77158	38.8869	0.16699	0.08361
Reaction	Dilatation atrial	1	5.4507	0.76779	38.6957	0.16774	0.08361
Reaction	Lung adenocarcinoma	1	5.39328	0.75971	38.2877	0.16937	0.08361
Reaction	Endometrial cancer	1	5.23628	0.73761	37.1722	0.17397	0.08361
Reaction	Blood creatinine abnormal	1	5.22805	0.73645	37.1138	0.17422	0.08361
Reaction	Gastrointestinal carcinoma	1	5.21985	0.7353	37.0555	0.17447	0.08361
Reaction	Meningioma	1	5.16716	0.72788	36.6812	0.17608	0.08361
Reaction	Hypercapnia	1	5.15117	0.72563	36.5676	0.17657	0.08361
Reaction	Open wound	1	5.12735	0.72228	36.3984	0.17732	0.08361
Reaction	Wound infection staphylococcal	1	5.12341	0.72172	36.3704	0.17744	0.08361
Reaction	Personality disorder	1	5.07651	0.71512	36.0372	0.17892	0.08361
Reaction	Metabolic encephalopathy	1	5.05722	0.71241	35.9002	0.17954	0.08361
Reaction	Calcinosis	1	5.0419	0.71025	35.7913	0.18003	0.08361
Reaction	Pseudomembranous colitis	1	5.03808	0.70971	35.7642	0.18016	0.08361
Reaction	Catheter related complication	1	5.00399	0.70491	35.522	0.18126	0.08361
Reaction	Onychomadesis	1	4.96294	0.69913	35.2304	0.18262	0.08361
Reaction	Brain natriuretic peptide increased	1	4.91893	0.69294	34.9177	0.18409	0.08361
Reaction	Tachyarrhythmia	1	4.86855	0.68585	34.5599	0.1858	0.08361
Reaction	Iron deficiency	1	4.82618	0.67988	34.2589	0.18727	0.08361
Reaction	Dysaesthesia	1	4.81919	0.6789	34.2093	0.18751	0.08361
Reaction	Bilirubin conjugated increased	1	4.60256	0.6484	32.6705	0.19541	0.08361
Reaction	Purulence	1	4.57724	0.64484	32.4906	0.19638	0.08361
Reaction	Adverse drug reaction	1	0.26747	0.03771	1.89741	0.19724	0.08361
Reaction	Speech disorder	1	0.26028	0.03669	1.84635	0.19799	0.08361
Reaction	Visual acuity reduced	1	0.2578	0.03634	1.82876	0.19856	0.08361
Reaction	Haemothorax	1	4.46965	0.62969	31.7264	0.20059	0.08361
Reaction	Breast swelling	1	4.41041	0.62135	31.3056	0.20299	0.08361
Reaction	Prostatitis	1	4.37561	0.61645	31.0585	0.20443	0.08361
Reaction	Urine analysis abnormal	1	4.31882	0.60845	30.6551	0.20682	0.08361
Reaction	Lung consolidation	1	4.27444	0.60221	30.3399	0.20872	0.08361
Reaction	Bronchiolitis	1	4.23096	0.59608	30.0311	0.21062	0.08361
Reaction	Occult blood positive	1	4.12604	0.58131	29.2859	0.21535	0.08361
Reaction	Blood thyroid stimulating hormone decreased	1	4.12349	0.58095	29.2678	0.21547	0.08361
Reaction	Diastolic dysfunction	1	4.07301	0.57384	28.9093	0.21782	0.08361
Reaction	Crepitations	1	4.07052	0.57349	28.8916	0.21794	0.08361
Reaction	Gastrointestinal necrosis	1	4.06059	0.57209	28.8211	0.21841	0.08361
Reaction	Arteriospasm coronary	1	4.03596	0.56863	28.6462	0.21959	0.08361
Reaction	Pancreatic carcinoma metastatic	1	4.0189	0.56623	28.525	0.22041	0.08361
Reaction	Hypoglycaemic coma	1	4.01648	0.56588	28.5078	0.22052	0.08361
Reaction	Duodenitis	1	3.93572	0.55451	27.9343	0.2245	0.08361
Reaction	Orthopnoea	1	3.93572	0.55451	27.9343	0.2245	0.08361
Reaction	Alcoholism	1	3.92875	0.55353	27.8848	0.22484	0.08361
Reaction	Meningitis aseptic	1	3.88518	0.5474	27.5753	0.22705	0.08361
Reaction	Granuloma	1	3.81393	0.53736	27.0694	0.23076	0.08361
Reaction	Haemorrhage subcutaneous	1	3.76219	0.53008	26.7019	0.23353	0.08361
Reaction	Platelet count abnormal	1	3.5762	0.50389	25.3812	0.24406	0.08361
Reaction	Hepatic lesion	1	3.56662	0.50254	25.3131	0.24462	0.08361
Reaction	Aplasia pure red cell	1	3.54383	0.49933	25.1513	0.24599	0.08361
Reaction	Ventricular hypokinesia	1	3.54194	0.49906	25.1379	0.2461	0.08361
Reaction	White blood cell count abnormal	1	3.51575	0.49537	24.9519	0.24768	0.08361
Reaction	Conjunctival haemorrhage	1	3.48263	0.49071	24.7168	0.24972	0.08361
Reaction	Pemphigoid	1	3.4627	0.4879	24.5752	0.25095	0.08361
Reaction	Guillain-Barre syndrome	1	3.38004	0.47626	23.9883	0.25623	0.08361
Reaction	Catheter site infection	1	3.34102	0.47076	23.7112	0.25879	0.08361
Reaction	Facial bones fracture	1	3.3111	0.46655	23.4988	0.2608	0.08361
Reaction	Infusion site erythema	1	3.25602	0.45879	23.1077	0.26456	0.08361
Reaction	Muscle haemorrhage	1	3.23544	0.4559	22.9616	0.266	0.08361
Reaction	Immobile	1	3.21979	0.45369	22.8504	0.2671	0.08361
Reaction	Erysipelas	1	3.21668	0.45325	22.8284	0.26732	0.08361
Reaction	Gastrointestinal sounds abnormal	1	3.18741	0.44913	22.6205	0.26941	0.08361
Reaction	Thrombophlebitis	1	3.1497	0.44382	22.3528	0.27215	0.08361
Reaction	Pancreatic disorder	1	3.13634	0.44194	22.2579	0.27313	0.08361
Reaction	Rash pruritic	1	0.29473	0.04155	2.09076	0.2755	0.08361
Reaction	Dry skin	1	0.29199	0.04116	2.07132	0.27594	0.08361
Reaction	Vaginal haemorrhage	1	0.28966	0.04083	2.05482	0.27644	0.08361
Reaction	Intracardiac thrombus	1	3.06132	0.43137	21.7253	0.27879	0.08361
Reaction	Abdominal hernia	1	3.03895	0.42822	21.5665	0.28052	0.08361
Reaction	Arrhythmia	1	0.27279	0.03846	1.93513	0.2837	0.08361
Reaction	Breast enlargement	1	2.97112	0.41867	21.0849	0.28591	0.08361
Reaction	Sleep disorder	1	0.26885	0.0379	1.90714	0.28642	0.08361
Reaction	Hypernatraemia	1	2.94483	0.41496	20.8982	0.28805	0.08361
Reaction	Epstein-Barr virus infection	1	2.93315	0.41332	20.8153	0.28902	0.08361
Reaction	Wound secretion	1	2.9267	0.41241	20.7695	0.28955	0.08361
Reaction	Injection site vesicles	1	2.90625	0.40953	20.6243	0.29126	0.08361
Reaction	Ileus paralytic	1	2.88233	0.40616	20.4545	0.29328	0.08361
Reaction	Venous thrombosis	1	2.87362	0.40493	20.3927	0.29402	0.08361
Reaction	Vulvovaginal mycotic infection	1	2.85146	0.40181	20.2354	0.29593	0.08361
Reaction	Cardiac failure acute	1	2.84536	0.40095	20.1921	0.29646	0.08361
Reaction	Femoral neck fracture	1	2.82603	0.39823	20.0548	0.29815	0.08361
Reaction	Social problem	1	2.74899	0.38738	19.5079	0.30507	0.08361
Reaction	Cerebrovascular disorder	1	2.68143	0.37786	19.0283	0.31141	0.08361
Reaction	Bundle branch block left	1	2.66639	0.37574	18.9215	0.31286	0.08361
Reaction	Lymphoedema	1	2.63056	0.3707	18.6671	0.31636	0.08361
Reaction	Intervertebral disc disorder	1	2.58358	0.36408	18.3336	0.32107	0.08361
Reaction	Sudden cardiac death	1	2.58358	0.36408	18.3336	0.32107	0.08361
Reaction	Hepatic necrosis	1	2.56565	0.36155	18.2064	0.32291	0.08361
Reaction	Blood uric acid increased	1	2.56269	0.36114	18.1853	0.32321	0.08361
Reaction	Congestive cardiomyopathy	1	2.54602	0.35879	18.067	0.32494	0.08361
Reaction	Metastases to lymph nodes	1	2.53632	0.35742	17.9981	0.32595	0.08361
Reaction	Cerebral atrophy	1	2.53246	0.35688	17.9707	0.32636	0.08361
Reaction	Abdominal tenderness	1	2.4889	0.35074	17.6615	0.331	0.08361
Reaction	Immunosuppression	1	2.47685	0.34904	17.576	0.33231	0.08361
Reaction	Encephalitis	1	2.42011	0.34105	17.1732	0.3386	0.08361
Reaction	Intestinal ischaemia	1	2.40351	0.33871	17.0553	0.34048	0.08361
Reaction	Gangrene	1	2.37774	0.33508	16.8725	0.34345	0.08361
Reaction	Organ failure	1	2.37097	0.33413	16.8244	0.34424	0.08361
Reaction	Cardiac flutter	1	2.30847	0.32532	16.3807	0.35169	0.08361
Reaction	Rales	1	2.24235	0.31601	15.9114	0.35992	0.08361
Reaction	Sputum discoloured	1	2.23332	0.31474	15.8473	0.36107	0.08361
Reaction	Ischaemia	1	2.22437	0.31348	15.7837	0.36222	0.08361
Reaction	Nuclear magnetic resonance imaging abnormal	1	2.19575	0.30944	15.5806	0.36595	0.08361
Reaction	Obstructive airways disorder	1	2.18781	0.30832	15.5242	0.367	0.08361
Reaction	Pulse absent	1	2.18493	0.30792	15.5038	0.36738	0.08361
Reaction	Dysgraphia	1	2.16292	0.30482	15.3476	0.37032	0.08361
Reaction	Diabetic neuropathy	1	2.12358	0.29928	15.0684	0.37569	0.08361
Reaction	Immune reconstitution syndrome	1	2.11079	0.29747	14.9775	0.37747	0.08361
Reaction	Acute pulmonary oedema	1	2.10478	0.29663	14.9349	0.37831	0.08361
Reaction	Necrosis	1	2.09352	0.29504	14.855	0.3799	0.08361
Reaction	Joint effusion	1	2.07784	0.29283	14.7437	0.38213	0.08361
Reaction	Skin discolouration	1	0.34566	0.04873	2.45206	0.38218	0.08361
Reaction	Dyskinesia	1	0.33486	0.0472	2.37544	0.38302	0.08361
Reaction	Road traffic accident	1	0.32698	0.04609	2.31953	0.38461	0.08361
Reaction	Surgery	1	0.31842	0.04489	2.25882	0.38737	0.08361
Reaction	Treatment noncompliance	1	0.31212	0.044	2.21412	0.39015	0.08361
Reaction	Blood magnesium decreased	1	2.02105	0.28483	14.3406	0.39043	0.08361
Reaction	International normalised ratio increased	1	0.31129	0.04388	2.20822	0.39057	0.08361
Reaction	Blister	1	0.30352	0.04279	2.15313	0.39507	0.08361
Reaction	Colitis ischaemic	1	1.98785	0.28015	14.1049	0.39545	0.08361
Reaction	Herpes simplex	1	1.946	0.27426	13.8079	0.40196	0.08361
Reaction	Pleurisy	1	1.93693	0.27298	13.7436	0.4034	0.08361
Reaction	Hydronephrosis	1	1.92183	0.27085	13.6364	0.40581	0.08361
Reaction	Ovarian cancer	1	1.87052	0.26362	13.2722	0.41424	0.08361
Reaction	Malabsorption	1	1.84562	0.26011	13.0955	0.41845	0.08361
Reaction	Pelvic fracture	1	1.83595	0.25875	13.0268	0.42011	0.08361
Reaction	Hiccups	1	1.81789	0.25621	12.8987	0.42324	0.08361
Reaction	Thermal burn	1	1.80802	0.25482	12.8286	0.42497	0.08361
Reaction	Thyroid cancer	1	1.79002	0.25228	12.7009	0.42816	0.08361
Reaction	Therapeutic agent toxicity	1	1.77854	0.25066	12.6194	0.43022	0.08361
Reaction	Right ventricular failure	1	1.77286	0.24986	12.5791	0.43124	0.08361
Reaction	Eye infection	1	1.7616	0.24827	12.4991	0.43329	0.08361
Reaction	Excoriation	1	1.75927	0.24795	12.4826	0.43372	0.08361
Reaction	Lower gastrointestinal haemorrhage	1	1.75324	0.2471	12.4398	0.43482	0.08361
Reaction	Nerve compression	1	1.74543	0.246	12.3844	0.43626	0.08361
Reaction	Coronary artery stenosis	1	1.72462	0.24306	12.2367	0.44015	0.08361
Reaction	Retinal haemorrhage	1	1.72283	0.24281	12.224	0.44049	0.08361
Reaction	Muscle strain	1	1.71484	0.24169	12.1673	0.442	0.08361
Reaction	Extrasystoles	1	1.69822	0.23934	12.0493	0.44518	0.08361
Reaction	Pulmonary thrombosis	1	1.69476	0.23886	12.0248	0.44584	0.08361
Reaction	Oral disorder	1	1.69432	0.2388	12.0217	0.44593	0.08361
Reaction	Torsade de pointes	1	1.69174	0.23843	12.0034	0.44643	0.08361
Reaction	Viral upper respiratory tract infection	1	1.67556	0.23615	11.8885	0.44958	0.08361
Reaction	Gingival pain	1	1.67471	0.23603	11.8825	0.44974	0.08361
Reaction	Facial pain	1	1.6498	0.23252	11.7057	0.45468	0.08361
Reaction	Nephropathy toxic	1	1.63924	0.23103	11.6308	0.45681	0.08361
Reaction	Atrial flutter	1	1.63441	0.23035	11.5965	0.45779	0.08361
Reaction	Feeding disorder	1	1.54451	0.21769	10.9585	0.47677	0.08361
Reaction	Hyperbilirubinaemia	1	1.5112	0.21299	10.7221	0.48419	0.08361
Reaction	Rash pustular	1	1.50607	0.21227	10.6857	0.48535	0.08361
Reaction	Motor dysfunction	1	1.4849	0.20929	10.5354	0.4902	0.08361
Reaction	Increased tendency to bruise	1	1.46981	0.20716	10.4284	0.49371	0.08361
Reaction	Hemiplegia	1	1.45312	0.20481	10.31	0.49766	0.08361
Reaction	Muscle disorder	1	1.43681	0.20251	10.1942	0.50157	0.08361
Reaction	Accident	1	1.43372	0.20207	10.1722	0.50232	0.08361
Reaction	Hypothermia	1	1.43063	0.20164	10.1503	0.50306	0.08361
Reaction	Spinal disorder	1	1.42086	0.20026	10.081	0.50545	0.08361
Reaction	Transfusion	1	1.40674	0.19827	9.98082	0.50893	0.08361
Reaction	Purpura	1	1.39876	0.19715	9.92417	0.51092	0.08361
Reaction	Blood testosterone decreased	1	1.38971	0.19587	9.85992	0.51319	0.08361
Reaction	Neoplasm	1	1.38652	0.19542	9.83732	0.514	0.08361
Reaction	Hypertensive crisis	1	1.35656	0.1912	9.62473	0.52168	0.08361
Reaction	Micturition urgency	1	1.34505	0.18958	9.54301	0.52469	0.08361
Reaction	Immune system disorder	1	1.33829	0.18863	9.49503	0.52648	0.08361
Reaction	Gastric disorder	1	0.40445	0.05701	2.86918	0.52908	0.08361
Reaction	Movement disorder	1	0.40126	0.05656	2.84651	0.52919	0.08361
Reaction	Ocular hyperaemia	1	0.40126	0.05656	2.84651	0.52919	0.08361
Reaction	Haematuria	1	0.3889	0.05482	2.75885	0.53028	0.08361
Reaction	Discomfort	1	0.37928	0.05347	2.69061	0.53191	0.08361
Reaction	Acute myocardial infarction	1	0.36485	0.05143	2.58824	0.53582	0.08361
Reaction	Hypomagnesaemia	1	1.30088	0.18336	9.22958	0.53655	0.08361
Reaction	Throat irritation	1	0.36219	0.05106	2.56936	0.53674	0.08361
Reaction	Cardiogenic shock	1	1.24865	0.17599	8.85894	0.55122	0.08361
Reaction	Respiratory depression	1	1.24004	0.17478	8.79786	0.55371	0.08361
Reaction	Embolism	1	1.23981	0.17475	8.79622	0.55378	0.08361
Reaction	Skin cancer	1	1.2359	0.1742	8.76845	0.55492	0.08361
Reaction	Malignant melanoma	1	1.22633	0.17285	8.70057	0.55772	0.08361
Reaction	Small intestinal obstruction	1	1.2234	0.17244	8.67978	0.55858	0.08361
Reaction	Emphysema	1	1.21603	0.1714	8.62743	0.56077	0.08361
Reaction	Vasculitis	1	1.21603	0.1714	8.62743	0.56077	0.08361
Reaction	Platelet count increased	1	1.19292	0.16814	8.46348	0.56771	0.08361
Reaction	Metastases to bone	1	1.18359	0.16683	8.39725	0.57056	0.08361
Reaction	Pharyngitis	1	1.15523	0.16283	8.19606	0.57938	0.08361
Reaction	Hepatomegaly	1	1.14215	0.16099	8.10321	0.58353	0.08361
Reaction	Cardiac murmur	1	1.13514	0.16	8.05345	0.58578	0.08361
Reaction	Blood count abnormal	1	1.12744	0.15891	7.99887	0.58826	0.08361
Reaction	Procedural complication	1	1.12687	0.15883	7.9948	0.58845	0.08361
Reaction	Injection site nodule	1	1.093	0.15406	7.75449	0.59962	0.08361
Reaction	Mydriasis	1	1.08623	0.15311	7.70639	0.6019	0.08361
Reaction	Brain oedema	1	1.07796	0.15194	7.64771	0.6047	0.08361
Reaction	Ventricular extrasystoles	1	1.06758	0.15048	7.57409	0.60825	0.08361
Reaction	Post procedural haemorrhage	1	1.06349	0.1499	7.54504	0.60967	0.08361
Reaction	Gastric haemorrhage	1	1.06247	0.14976	7.53781	0.61002	0.08361
Reaction	Injection site extravasation	1	1.0601	0.14942	7.521	0.61084	0.08361
Reaction	Impaired driving ability	1	1.03762	0.14626	7.36151	0.61872	0.08361
Reaction	Oral herpes	1	1.01175	0.14261	7.17794	0.628	0.08361
Reaction	Drug resistance	1	1.01129	0.14254	7.17467	0.62817	0.08361
Reaction	Pneumothorax	1	1.00579	0.14177	7.13563	0.63018	0.08361
Reaction	Eosinophilia	1	1.00412	0.14153	7.12379	0.63079	0.08361
Reaction	Head injury	1	0.46714	0.06585	3.31387	0.73036	0.08361
Reaction	Intestinal obstruction	1	0.46511	0.06556	3.29951	0.73053	0.08361
Reaction	Cystitis	1	0.45978	0.06481	3.26167	0.73104	0.08361
Reaction	Ill-defined disorder	1	0.44754	0.06309	3.17481	0.73252	0.08361
Reaction	Hyperkalaemia	1	0.43049	0.06068	3.05385	0.7354	0.08361
Reaction	Blood pressure systolic increased	1	0.96496	0.13601	6.8459	1	0.08361
Reaction	Abscess	1	0.93408	0.13166	6.6268	1	0.08361
Reaction	Paralysis	1	0.92641	0.13058	6.57237	1	0.08361
Reaction	Blood glucose abnormal	1	0.90536	0.12762	6.42304	1	0.08361
Reaction	Bronchospasm	1	0.90266	0.12723	6.40387	1	0.08361
Reaction	Ulcer	1	0.89876	0.12668	6.3762	1	0.08361
Reaction	Wound	1	0.87123	0.1228	6.18085	1	0.08361
Reaction	Hepatic cirrhosis	1	0.86086	0.12134	6.10729	1	0.08361
Reaction	Gout	1	0.85522	0.12055	6.06726	1	0.08361
Reaction	Injection site irritation	1	0.84619	0.11928	6.00323	1	0.08361
Reaction	Haemorrhage intracranial	1	0.83778	0.11809	5.94352	1	0.08361
Reaction	Sinus disorder	1	0.83609	0.11785	5.93157	1	0.08361
Reaction	Ischaemic stroke	1	0.80916	0.11406	5.74044	1	0.08361
Reaction	Toothache	1	0.80271	0.11315	5.69474	1	0.08361
Reaction	Hyperlipidaemia	1	0.78854	0.11115	5.59419	1	0.08361
Reaction	Hallucination, visual	1	0.77831	0.10971	5.52156	1	0.08361
Reaction	Rash maculo-papular	1	0.7587	0.10694	5.38244	1	0.08361
Reaction	Cyanosis	1	0.7538	0.10625	5.34769	1	0.08361
Reaction	Glycosylated haemoglobin increased	1	0.73248	0.10325	5.19641	1	0.08361
Reaction	Coagulopathy	1	0.72012	0.10151	5.10869	1	0.08361
Reaction	Hemiparesis	1	0.71632	0.10097	5.08174	1	0.08361
Reaction	Oral pain	1	0.65076	0.09173	4.6166	1	0.08361
Reaction	Deafness	1	0.63785	0.08991	4.52501	1	0.08361
Reaction	Presyncope	1	0.63287	0.08921	4.48972	1	0.08361
Reaction	Melaena	1	0.61835	0.08716	4.38667	1	0.08361
Reaction	Ageusia	1	0.60267	0.08495	4.27544	1	0.08361
Reaction	Bone disorder	1	0.58585	0.08258	4.15612	1	0.08361
Reaction	Muscle twitching	1	0.57467	0.08101	4.0768	1	0.08361
Reaction	Mental impairment	1	0.57433	0.08096	4.07434	1	0.08361
Reaction	Procedural pain	1	0.55642	0.07843	3.94727	1	0.08361
Reaction	Metabolic acidosis	1	0.55034	0.07758	3.90418	1	0.08361
Reaction	Abdominal pain lower	1	0.53264	0.07508	3.77857	1	0.08361
Reaction	Peritonitis	1	0.52392	0.07385	3.71669	1	0.08361
Reaction	Haemoptysis	1	0.50734	0.07152	3.5991	1	0.08361
Reaction	Unresponsive to stimuli	1	0.50734	0.07152	3.5991	1	0.08361
Reaction	Injection site warmth	1	0.50726	0.07151	3.59855	1	0.08361
Reaction	Night sweats	1	0.50484	0.07116	3.58135	1	0.08361
Outcome	Other	554	1.35878	1.27835	1.44427	0	46.3211
Outcome	Hospitalization - Initial or Prolonged	496	1.70251	1.59164	1.82111	0	41.4716
Outcome	Death	399	3.30018	3.04606	3.57549	0	33.3612
Outcome	Life-Threatening	88	2.43171	1.98864	2.97349	0	7.35786
Outcome	Disability	25	0.86893	0.58954	1.2807	0.57035	2.0903
Outcome	Required Intervention to Prevent Permanent Impairment/Damage	15	1.43409	0.86726	2.37137	0.1595	1.25418
Outcome	Congenital Anomaly	1	0.19086	0.02691	1.35391	0.07381	0.08361

## Sheet: Zevalin.Data.VigiBase.Stats
CONCEPT	NAME	CONCEPT_AES_IN_COHORT	PRR	PRR_95CI(-)	PRR_95CI(+)	P-value Fisher Exact Test (two tailed)	COHORT_%COVERAGE
Indication	Non-hodgkin's lymphoma	416	825.095	762.036	893.373	0	36.9778
Indication	B-cell lymphoma	151	506.383	435.307	589.064	0	13.4222
Indication	Lymphoma	87	202.071	164.898	247.625	0	7.73333
Indication	Allogeneic stem cell transplantation	48	4240.42	3095.95	5807.97	0	4.26667
Indication	Prophylaxis	48	5.53311	4.19502	7.29802	0	4.26667
Indication	Immunosuppression	47	87.4015	66.0105	115.724	0	4.17778
Indication	Follicular b-cell non-hodgkin's lymphoma	40	612.695	449.092	835.899	0	3.55556
Indication	B-cell lymphoma recurrent	34	9747.64	6362.01	14935	0	3.02222
Indication	Non-hodgkin's lymphoma nos	33	7484.03	4953.31	11307.7	0	2.93333
Indication	Mantle cell lymphoma	32	97.4614	69.187	137.291	0	2.84444
Indication	Diffuse large b-cell lymphoma	31	85.6748	60.486	121.353	0	2.75556
Indication	Premedication	26	15.8185	10.8163	23.1339	0	2.31111
Indication	Product used for unknown indication	26	0.32268	0.22068	0.47181	0	2.31111
Indication	Drug use for unknown indication	21	0.92674	0.60666	1.41571	0.83174	1.86667
Indication	Follicle centre lymphoma, follicular grade i, ii, iii	20	4981.92	3016.74	8227.27	0	1.77778
Indication	Hypertension	16	0.94811	0.58286	1.54223	1	1.42222
Indication	Allogeneic peripheral hematopoietic stem cell transplant	14	2502.68	1426.27	4391.46	0	1.24444
Indication	Nodular (follicular) lymphoma	14	223.689	132.4	377.92	0	1.24444
Indication	Constipation	13	3.9162	2.28096	6.72376	4e-05	1.15556
Indication	Multiple myeloma	13	3.688	2.14805	6.33194	8e-05	1.15556
Indication	Extranodal marginal zone b-cell lymphoma (malt type)	10	1489.69	780.145	2844.57	0	0.88889
Indication	Antifungal prophylaxis	9	31.0451	16.1845	59.5505	0	0.8
Indication	Lymphoma (non-hodgkin's)	8	264.258	131.685	530.3	0	0.71111
Indication	Gastritis prophylaxis	8	29.9923	15.0256	59.8668	0	0.71111
Indication	Infection prophylaxis	8	13.2014	6.61624	26.3409	0	0.71111
Indication	Follicle centre lymphoma, follicular grade i, ii, iii stage iii	7	35454.6	9179.64	136937	0	0.62222
Indication	Follicle centre lymphoma, follicular grade i, ii, iii recurrent	7	15194.8	5338.38	43249.6	0	0.62222
Indication	Non-hodgkin's lymphoma progression	6	3143.76	1307.75	7557.41	0	0.53333
Indication	Diffuse lymphoma	6	360.352	160.709	808.005	0	0.53333
Indication	Stem cell transplant	6	36.0637	16.221	80.1796	0	0.53333
Indication	Immunosuppressant drug therapy	6	16.8675	7.59064	37.4822	0	0.53333
Indication	Follicle centre lymphoma, follicular grade i, ii, iii stage ii	5	75974.2	8882.8	649804	0	0.44444
Indication	Other lymphoma	5	150.743	62.592	363.038	0	0.44444
Indication	Prophylaxis against graft versus host disease	5	18.2192	7.59403	43.7107	1e-05	0.44444
Indication	Gastritis	5	7.15186	2.98195	17.1529	0.00078	0.44444
Indication	Neuropathy peripheral	5	3.88138	1.61849	9.30817	0.01024	0.44444
Indication	Insomnia	5	1.21547	0.50687	2.91467	0.61477	0.44444
Indication	Mantle cell lymphoma stage iv	4	706.737	259.779	1922.7	0	0.35556
Indication	Mantle cell lymphoma recurrent	4	590.091	217.705	1599.45	0	0.35556
Indication	Urticaria	4	12.8552	4.83111	34.2066	0.0003	0.35556
Indication	Pruritus	4	7.78325	2.9255	20.7072	0.00193	0.35556
Indication	Pyrexia	4	6.37702	2.39705	16.9652	0.00391	0.35556
Indication	Pain	4	0.32977	0.12398	0.87715	0.01325	0.35556
Indication	Osteoporosis	4	0.43982	0.16536	1.16987	0.09512	0.35556
Indication	Extranodal marginal zone b-cell lymphoma (malt type) stage iv	3	9116.91	2181.35	38104	0	0.26667
Indication	Mantle cell lymphoma stage iii	3	5064.95	1372.98	18684.7	0	0.26667
Indication	Mantle cell lymphoma nos	3	2170.69	648.379	7267.21	0	0.26667
Indication	Nodal marginal zone b-cell lymphoma	3	990.968	308.654	3181.61	0	0.26667
Indication	Non-hodgkin's lymphoma recurrent	3	530.053	167.886	1673.49	0	0.26667
Indication	B-immunoblastic lymphoma (kiel classification)	3	500.929	158.831	1579.85	0	0.26667
Indication	Non-hodgkin's lymphoma unspecified histology indolent	3	201.701	64.6635	629.157	0	0.26667
Indication	B-cell small lymphocytic lymphoma	3	138.135	44.3892	429.863	0	0.26667
Indication	Rheumatoid arthritis	3	0.10307	0.03329	0.3191	0	0.26667
Indication	Transplant	3	33.0802	10.6718	102.541	0.00012	0.26667
Indication	Non-hodgkin's lymphoma, unspecified type	3	32.3065	10.4225	100.14	0.00012	0.26667
Indication	Prophylaxis against gastrointestinal ulcer	3	6.55987	2.11833	20.314	0.01135	0.26667
Indication	Hyperuricaemia	3	4.19245	1.35396	12.9817	0.03603	0.26667
Indication	Type 2 diabetes mellitus	3	0.33332	0.10766	1.03196	0.04243	0.26667
Indication	Benign prostatic hyperplasia	3	2.96446	0.95742	9.17886	0.08246	0.26667
Indication	Angina pectoris	3	1.72845	0.55826	5.35156	0.25218	0.26667
Indication	Gastrooesophageal reflux disease	3	0.66876	0.216	2.0705	0.63865	0.26667
Indication	Follicle centre lymphoma, follicular grade i, ii, iii stage i	2	10129.9	1694.21	60567.8	0	0.17778
Indication	Non-hodgkin's lymphoma nos recurrent	2	6077.94	1180.4	31295.6	0	0.17778
Indication	Maculopapular rash	2	2025.98	463.836	8849.22	0	0.17778
Indication	Follicle centre lymphoma, follicular grade i, ii, iii stage iv	2	1266.24	299.606	5351.55	0	0.17778
Indication	Diffuse large b-cell lymphoma nos	2	675.326	164.023	2780.49	0	0.17778
Indication	B-cell lymphoma stage iv	2	467.534	114.617	1907.12	1e-05	0.17778
Indication	Non-hodgkin's lymphoma refractory	2	460.45	112.916	1877.62	1e-05	0.17778
Indication	Allogeneic peripheral haematopoietic stem cell transplant	2	319.891	78.9456	1296.22	2e-05	0.17778
Indication	Lymphoma nos	2	316.559	78.135	1282.52	2e-05	0.17778
Indication	Cerebral lymphoma	2	310.099	76.5628	1255.98	2e-05	0.17778
Indication	Diffuse large b-cell lymphoma recurrent	2	273.781	67.7071	1107.06	3e-05	0.17778
Indication	Diffuse large b-cell lymphoma refractory	2	259.741	64.2757	1049.62	3e-05	0.17778
Indication	Nodular lymphoma	2	235.579	58.3604	950.944	4e-05	0.17778
Indication	Central nervous system lymphoma	2	71.3373	17.8048	285.822	0.00039	0.17778
Indication	Diabetes mellitus	2	0.15741	0.03941	0.62862	0.00057	0.17778
Indication	Burkitt's lymphoma	2	42.7422	10.6818	171.029	0.00106	0.17778
Indication	B-cell lymphoma, unspecified	2	31.9891	7.99839	127.939	0.00188	0.17778
Indication	Anaemia of malignant disease	2	22.6958	5.67714	90.7322	0.00367	0.17778
Indication	Sjogren's syndrome	2	17.2964	4.32758	69.1295	0.0062	0.17778
Indication	Prophylaxis nos	2	9.44953	2.36514	37.7541	0.01948	0.17778
Indication	Thrombocytopenia	2	8.2648	2.06872	33.0189	0.02496	0.17778
Indication	Neutropenia	2	6.78039	1.69728	27.0866	0.03582	0.17778
Indication	Antiviral prophylaxis	2	6.13437	1.53562	24.5052	0.04289	0.17778
Indication	Prophylaxis of nausea and vomiting	2	5.42576	1.35827	21.6738	0.05334	0.17778
Indication	Anxiety	2	0.36361	0.09105	1.45214	0.19296	0.17778
Indication	Gout	2	1.33704	0.33478	5.33997	0.66473	0.17778
Indication	Hyperlipidaemia	2	1.09394	0.27391	4.369	0.70617	0.17778
Indication	Nausea	2	1.09359	0.27382	4.36758	0.70625	0.17778
Indication	Thrombosis prophylaxis	2	0.69483	0.17398	2.77496	1	0.17778
Indication	Extranodal marginal zone b-cell lymphoma (malt type) stage iii	2	N/A	N/A	N/A	N/A	0.17778
Indication	Extranodal marginal zone b-cell lymphoma (malt type) stage i	1	15194.8	950.957	242790	0.00013	0.08889
Indication	Lymphoplasmacytoid lymphoma/immunocytoma stage iv	1	15194.8	950.957	242790	0.00013	0.08889
Indication	Nodal marginal zone b-cell lymphoma stage i	1	15194.8	950.957	242790	0.00013	0.08889
Indication	Non-hodgkin's lymphoma nos stage i	1	15194.8	950.957	242790	0.00013	0.08889
Indication	B-large cell anaplastic lymphoma (kiel classification) recurrent	1	7597.42	689.368	83730	0.0002	0.08889
Indication	Non-hodgkin's lymphoma transformed recurrent	1	7597.42	689.368	83730	0.0002	0.08889
Indication	Follicle centre lymphoma, follicular grade i, ii, iii refractory	1	5064.95	527.232	48657.3	0.00026	0.08889
Indication	Lymphoplasmacytoid lymphoma/immunocytoma recurrent	1	5064.95	527.232	48657.3	0.00026	0.08889
Indication	B-immunoblastic lymphoma (kiel classification) recurrent	1	3798.71	424.898	33961.6	0.00033	0.08889
Indication	Follicular mixed small and large cell lymphoma stage iii	1	3798.71	424.898	33961.6	0.00033	0.08889
Indication	Non-hodgkin's lymphoma stage i	1	1688.32	214.068	13315.5	0.00066	0.08889
Indication	No therapeutic response	1	949.678	126.046	7155.23	0.00112	0.08889
Indication	B-cell lymphoma refractory	1	660.645	89.2923	4887.91	0.00158	0.08889
Indication	Platelet transfusion	1	660.645	89.2923	4887.91	0.00158	0.08889
Indication	Large b-cell lymphoma subtype primary mediastinal (thymic) large b-cell lymphoma	1	633.118	85.7207	4676.1	0.00164	0.08889
Indication	Burkitt's lymphoma stage iv	1	584.417	79.371	4303.12	0.00178	0.08889
Indication	Non-hodgkin's lymphoma stage iii	1	523.96	71.4334	3843.22	0.00197	0.08889
Indication	Acute granulocytic leukaemia	1	422.079	57.9173	3075.95	0.00243	0.08889
Indication	Single photon emission computerised tomogram	1	316.559	43.7312	2291.49	0.00322	0.08889
Indication	Autograft	1	261.98	36.3178	1889.8	0.00388	0.08889
Indication	Acute graft versus host disease in skin	1	237.419	32.9648	1709.95	0.00427	0.08889
Indication	Mantle cell lymphoma refractory	1	220.215	30.6097	1584.29	0.0046	0.08889
Indication	Hiv infection cdc category c3	1	208.149	28.9549	1496.32	0.00486	0.08889
Indication	Aortic valve incompetence	1	199.932	27.8266	1436.5	0.00505	0.08889
Indication	Lymphoma malignant	1	199.932	27.8266	1436.5	0.00505	0.08889
Indication	Skin disorder nos	1	194.806	27.122	1399.21	0.00519	0.08889
Indication	Viral hepatitis carrier	1	189.936	26.4522	1363.8	0.00532	0.08889
Indication	Osteomyelitis chronic	1	183.07	25.5073	1313.93	0.00551	0.08889
Indication	Mantle zone lymphoma	1	156.648	21.8629	1122.38	0.00643	0.08889
Indication	Surgical preconditioning	1	156.648	21.8629	1122.38	0.00643	0.08889
Indication	Psychosomatic disease	1	146.104	20.4051	1046.13	0.00689	0.08889
Indication	Non-hodgkin's lymphoma stage iv	1	130.99	18.312	937	0.00767	0.08889
Indication	Diffuse large b-cell lymphoma stage iv	1	119.644	16.7382	855.219	0.00839	0.08889
Indication	Radioisotope scan	1	117.789	16.4806	841.86	0.00852	0.08889
Indication	Allogenic stem cell transplantation	1	113.394	15.8702	810.218	0.00884	0.08889
Indication	Blood stem cell transplant	1	100.628	14.095	718.411	0.00995	0.08889
Indication	Malignant neoplasm progression	1	89.9103	12.6024	641.452	0.01113	0.08889
Indication	Gvhd	1	89.3814	12.5287	637.657	0.01119	0.08889
Indication	Prurigo	1	84.4158	11.8365	602.039	0.01184	0.08889
Indication	Prophylaxis against dehydration	1	75.222	10.5536	536.153	0.01327	0.08889
Indication	Asthma	1	0.1372	0.01934	0.97318	0.01344	0.08889
Indication	Primary central nervous system lymphoma	1	70.3465	9.87267	501.245	0.01418	0.08889
Indication	Lymphocytic lymphoma	1	62.7886	8.81626	447.175	0.01586	0.08889
Indication	Coronary artery disease nos	1	56.9095	7.99379	405.151	0.01748	0.08889
Indication	Unspecified immunity deficiency	1	55.0538	7.73405	391.893	0.01806	0.08889
Indication	Neutrophil count decreased	1	41.7441	5.86931	296.895	0.02373	0.08889
Indication	Colony stimulating factor prophylaxis	1	40.0919	5.63762	285.114	0.0247	0.08889
Indication	Sleep disorder nos	1	38.178	5.36915	271.47	0.02592	0.08889
Indication	Atypical mycobacterial infection	1	37.7043	5.30269	268.093	0.02624	0.08889
Indication	Pleural effusion	1	27.0853	3.81185	192.456	0.03631	0.08889
Indication	Blood uric acid increased	1	24.8282	3.49471	176.392	0.03954	0.08889
Indication	Therapeutic procedure	1	21.8946	3.08237	155.521	0.04471	0.08889
Indication	Metastasis	1	17.5663	2.47371	124.742	0.0554	0.08889
Indication	Invasive ductal breast carcinoma	1	16.0962	2.26691	114.291	0.0603	0.08889
Indication	Hepatitis c	1	0.19706	0.02778	1.39777	0.07196	0.08889
Indication	Stomatitis	1	11.6614	1.64281	82.7785	0.08224	0.08889
Indication	Fluid replacement	1	11.4592	1.61433	81.3416	0.08363	0.08889
Indication	Carcinoid syndrome	1	10.3861	1.46326	73.7194	0.09185	0.08889
Indication	Liver disorder	1	10.2185	1.43966	72.5288	0.09329	0.08889
Indication	Chronic hepatitis b	1	9.80945	1.38207	69.6239	0.09698	0.08889
Indication	Oropharyngeal pain	1	9.61091	1.35412	68.2138	0.09888	0.08889
Indication	Hypothyroidism	1	0.21666	0.03054	1.5368	0.10073	0.08889
Indication	Productive cough	1	9.34492	1.31666	66.3248	0.10154	0.08889
Indication	Chronic gastritis	1	9.33344	1.31505	66.2433	0.10166	0.08889
Indication	Asthenia	1	8.83421	1.24475	62.6981	0.10709	0.08889
Indication	Flatulence	1	8.30773	1.17061	58.9595	0.11347	0.08889
Indication	Decreased appetite	1	8.2896	1.16805	58.8308	0.1137	0.08889
Indication	Cancer	1	8.06949	1.13705	57.2678	0.11661	0.08889
Indication	Hypoaesthesia	1	7.48514	1.05476	53.1189	0.12512	0.08889
Indication	Hypertension nos	1	7.28071	1.02596	51.6674	0.12839	0.08889
Indication	Cardiovascular disorder	1	5.60282	0.78961	39.756	0.16352	0.08889
Indication	Bone marrow conditioning regimen	1	5.45204	0.76837	38.6857	0.16764	0.08889
Indication	Hodgkin's disease	1	4.53713	0.63946	32.1919	0.19787	0.08889
Indication	Pain nos	1	4.40175	0.62039	31.2311	0.20329	0.08889
Indication	Nephrogenic anaemia	1	4.3992	0.62003	31.213	0.20339	0.08889
Indication	Iron deficiency	1	4.31304	0.60789	30.6015	0.207	0.08889
Indication	Rectal cancer	1	3.3322	0.46968	23.6409	0.25933	0.08889
Indication	Routine health maintenance	1	3.29535	0.46448	23.3793	0.26181	0.08889
Indication	Prophylaxis against transplant rejection	1	2.98406	0.42062	21.1705	0.28482	0.08889
Indication	Liver transplant	1	2.92659	0.41252	20.7626	0.28951	0.08889
Indication	Cerebral infarction	1	2.77177	0.3907	19.6641	0.30295	0.08889
Indication	Metastases to bone	1	2.1738	0.30642	15.4212	0.36882	0.08889
Indication	Arthritis	1	0.32441	0.04574	2.30115	0.3853	0.08889
Indication	Haemolytic uraemic syndrome	1	1.90962	0.26919	13.5469	0.40776	0.08889
Indication	Prevention	1	1.84068	0.25947	13.0578	0.41926	0.08889
Indication	Fever	1	1.81648	0.25606	12.886	0.42345	0.08889
Indication	Cystitis	1	1.73755	0.24493	12.3261	0.4377	0.08889
Indication	Cardiac failure	1	1.55319	0.21895	11.0181	0.47485	0.08889
Indication	Off label use	1	1.3266	0.18701	9.41055	0.52957	0.08889
Indication	Dyspnoea	1	1.29164	0.18208	9.16255	0.53907	0.08889
Indication	Breast cancer metastatic	1	1.2094	0.17049	8.57908	0.56273	0.08889
Indication	Fibromyalgia	1	0.48492	0.06836	3.43969	0.72934	0.08889
Indication	Thyroid disorder	1	0.79103	0.11151	5.61116	1	0.08889
Indication	Myelodysplastic syndrome	1	0.77465	0.10921	5.49501	1	0.08889
Indication	Lung neoplasm malignant	1	0.76765	0.10822	5.44531	1	0.08889
Indication	Deep vein thrombosis	1	0.73441	0.10353	5.20949	1	0.08889
Indication	Diabetes mellitus non-insulin-dependent	1	0.68727	0.09689	4.87512	1	0.08889
Indication	Cough	1	0.56233	0.07928	3.98886	1	0.08889
Indication	Dyspepsia	1	0.52603	0.07416	3.73132	1	0.08889
Indication	Sleep disorder	1	0.52171	0.07355	3.7007	1	0.08889
Indication	Carbohydrate antigen 15-3 increased	1	N/A	N/A	N/A	N/A	0.08889
Indication	Diffuse large cell lymphoma (diffuse large b-cell lymphoma) (working formulation) stage ii	1	N/A	N/A	N/A	N/A	0.08889
Indication	Extranodal marginal zone b-cell lymphoma (malt type) recurrent	1	N/A	N/A	N/A	N/A	0.08889
Indication	Mantle cell lymphoma stage i	1	N/A	N/A	N/A	N/A	0.08889
Indication	Non-hodgkin's lymphoma unspecified histology low grade stage iii	1	N/A	N/A	N/A	N/A	0.08889
Outcome	Other	358	2.53713	2.32912	2.76371	0	31.8222
Outcome	Death	257	5.77806	5.18957	6.43329	0	22.8444
Outcome	Caused/Prolonged Hospitalization	249	1.86734	1.67347	2.08366	0	22.1333
Outcome	Life threatening	44	2.36483	1.7701	3.15938	0	3.91111
Outcome	Disabling/Incapacitating	3	0.32285	0.10428	0.99954	0.03123	0.26667
Outcome	Congenital anomaly/Birth defect	1	0.73944	0.10424	5.24524	1	0.08889
Product (drug)	Zevalin	793	N/A	N/A	N/A	N/A	70.4889
Product (drug)	Rituximab	309	183.536	166.778	201.977	0	27.4667
Product (drug)	Zevalin yttrium	218	N/A	N/A	N/A	N/A	19.3778
Product (drug)	Rituxan	203	139.038	122.672	157.587	0	18.0444
Product (drug)	Zevalin indium	197	N/A	N/A	N/A	N/A	17.5111
Product (drug)	Etoposide	126	74.3024	63.0009	87.6312	0	11.2
Product (drug)	Prednisone	107	7.93294	6.62419	9.50026	0	9.51111
Product (drug)	Ytracis	104	N/A	N/A	N/A	N/A	9.24444
Product (drug)	Fludarabine	99	297.643	246.107	359.972	0	8.8
Product (drug)	Cyclophosphamide	98	19.7333	16.33	23.8459	0	8.71111
Product (drug)	Drug name/s not accepted in who-dd	87	4.98276	4.07187	6.09741	0	7.73333
Product (drug)	Ibritumomab tiuxetan	72	N/A	N/A	N/A	N/A	6.4
Product (drug)	Vincristine	71	48.5131	38.7179	60.7864	0	6.31111
Product (drug)	Indium (111 in)	60	20720.2	14104.7	30438.7	0	5.33333
Product (drug)	Doxorubicin	59	43.7742	34.1335	56.1379	0	5.24444
Product (drug)	Cisplatin	56	14.3662	11.1277	18.5472	0	4.97778
Product (drug)	Carboplatin	54	17.2909	13.3269	22.434	0	4.8
Product (drug)	Melphalan	53	106.426	81.7511	138.549	0	4.71111
Product (drug)	Ciclosporin a	52	2832.01	2118.61	3785.64	0	4.62222
Product (drug)	Mabthera	51	37.3572	28.5603	48.8635	0	4.53333
Product (drug)	Cytarabine	50	36.0272	27.4669	47.2554	0	4.44444
Product (drug)	Filgrastim	39	98.8819	72.5681	134.737	0	3.46667
Product (drug)	Drug name/s under assessment for who-dd	38	0.86271	0.63114	1.17924	0.3975	3.37778
Product (drug)	Fludarabine phosphate	32	134.393	95.364	189.396	0	2.84444
Product (drug)	Ifosfamide	32	59.7561	42.4387	84.1398	0	2.84444
Product (drug)	Doxorubicin hydrochloride	32	21.4134	15.2145	30.138	0	2.84444
Product (drug)	Dexamethasone	30	3.73892	2.62665	5.32218	0	2.66667
Product (drug)	Carmustine	28	307.855	212.742	445.49	0	2.48889
Product (drug)	Busulfex	26	284.835	194.098	417.99	0	2.31111
Product (drug)	Allopurinol	26	4.68704	3.20535	6.85365	0	2.31111
Product (drug)	Baktar	25	63.3964	42.9897	93.4898	0	2.22222
Product (drug)	Yttrium 90 Ibritumomab Tiuxetan	24	N/A	N/A	N/A	N/A	2.13333
Product (drug)	Busulfan	23	122.111	81.352	183.291	0	2.04444
Product (drug)	Ifex	22	438.121	287.922	666.675	0	1.95556
Product (drug)	Procytox	22	324.55	213.618	493.089	0	1.95556
Product (drug)	Vincristina	22	150.241	99.1262	227.714	0	1.95556
Product (drug)	Oncovin	21	81.5049	53.2933	124.651	0	1.86667
Product (drug)	Vincristine sulfate	21	26.7358	17.4952	40.857	0	1.86667
Product (drug)	Diflucan	21	18.262	11.9516	27.9042	0	1.86667
Product (drug)	Endoxan	21	16.3796	10.72	25.0273	0	1.86667
Product (drug)	Prednisolone	21	4.14426	2.71277	6.33114	0	1.86667
Product (drug)	Zevalin (Y90)	21	N/A	N/A	N/A	N/A	1.86667
Product (drug)	Calonal	20	53.0361	34.324	81.9492	0	1.77778
Product (drug)	Allegra	19	8.84883	5.66503	13.822	0	1.68889
Product (drug)	Fludara	18	68.2063	43.0872	107.969	0	1.6
Product (drug)	Granulocyte colony stimulating factor	16	139.883	85.8019	228.053	0	1.42222
Product (drug)	Aspirin	16	0.78624	0.48335	1.27893	0.43167	1.42222
Product (drug)	Bendamustine	15	77.4194	46.7707	128.152	0	1.33333
Product (drug)	Ativan	15	4.61018	2.7885	7.62192	0	1.33333
Product (drug)	Aracytine	14	140.6	83.3396	237.203	0	1.24444
Product (drug)	Methylprednisolone	14	8.03413	4.77311	13.5231	0	1.24444
Product (drug)	Coumadin	14	2.11004	1.25371	3.55127	0.00949	1.24444
Product (drug)	Mitoxantrone	13	91.155	53.0093	156.75	0	1.15556
Product (drug)	Decadron	13	7.28904	4.24518	12.5154	0	1.15556
Product (drug)	Norvasc	13	2.27465	1.32489	3.90526	0.00916	1.15556
Product (drug)	Ciclofosfamida	12	77.8557	44.2841	136.878	0	1.06667
Product (drug)	Neupogen	12	14.8981	8.48397	26.1616	0	1.06667
Product (drug)	Acetaminophen	12	2.87016	1.63482	5.03895	0.00129	1.06667
Product (drug)	Adriacin	11	140.457	77.7963	253.586	0	0.97778
Product (drug)	Polaramine	11	28.8676	16.024	52.0055	0	0.97778
Product (drug)	Predonine	11	14.2129	7.89164	25.5974	0	0.97778
Product (drug)	Fluconazole	11	6.29068	3.49342	11.3278	0	0.97778
Product (drug)	Multivitamin	11	2.37382	1.31836	4.27427	0.00805	0.97778
Product (drug)	Tylenol	11	1.91639	1.06432	3.45059	0.03559	0.97778
Product (drug)	Lasix	11	1.09712	0.60933	1.9754	0.74911	0.97778
Product (drug)	Citarabina	10	98.4122	52.9902	182.769	0	0.88889
Product (drug)	Tacrolimus	10	5.96953	3.22038	11.0655	1e-05	0.88889
Product (drug)	Prevacid	10	3.98857	2.1518	7.39319	0.00028	0.88889
Product (drug)	Methotrexate	10	0.79955	0.43138	1.48195	0.56989	0.88889
Product (drug)	Synthroid	10	1.17619	0.63458	2.18005	0.60199	0.88889
Product (drug)	Yttrium (90 y)	9	3108.04	1520.94	6351.24	0	0.8
Product (drug)	Bicnu	9	200.225	104.003	385.47	0	0.8
Product (drug)	Doxorubicina	9	130.865	68.0764	251.564	0	0.8
Product (drug)	Cytoxan	9	14.4989	7.56131	27.8018	0	0.8
Product (drug)	Oxycontin	9	2.6107	1.36185	5.00476	0.00891	0.8
Product (drug)	Neurontin	9	1.99097	1.03859	3.81667	0.05167	0.8
Product (drug)	Lorazepam	9	1.90173	0.99204	3.6456	0.06037	0.8
Product (drug)	Fludarabina	8	208.506	104.034	417.89	0	0.71111
Product (drug)	Bendamustine hydrochloride	8	65.7785	32.927	131.406	0	0.71111
Product (drug)	Doxorubicin hcl	8	23.3767	11.7131	46.6545	0	0.71111
Product (drug)	Neulasta	8	5.35336	2.68346	10.6797	0.00016	0.71111
Product (drug)	Toprol	8	2.80529	1.40628	5.59608	0.00892	0.71111
Product (drug)	Albuterol	8	1.87962	0.94226	3.74945	0.08157	0.71111
Product (drug)	Calcium	8	1.43454	0.71915	2.86158	0.28286	0.71111
Product (drug)	Treakisym	7	226.306	107.541	476.231	0	0.62222
Product (drug)	Omepral	7	40.3811	19.2763	84.593	0	0.62222
Product (drug)	Cefepime	7	21.384	10.2126	44.7757	0	0.62222
Product (drug)	Prednisona	7	19.5307	9.32786	40.8932	0	0.62222
Product (drug)	Takepron	7	9.51377	4.5449	19.915	1e-05	0.62222
Product (drug)	Meropenem	7	7.82721	3.73935	16.3839	4e-05	0.62222
Product (drug)	Dilaudid	7	6.46589	3.0891	13.5339	0.00013	0.62222
Product (drug)	Velcade	7	3.44053	1.64385	7.20093	0.00492	0.62222
Product (drug)	Vicodin	7	3.34867	1.59996	7.00867	0.00567	0.62222
Product (drug)	Protonix	7	2.53308	1.2103	5.30155	0.02281	0.62222
Product (drug)	Oxycodone	7	2.49727	1.1932	5.22661	0.02438	0.62222
Product (drug)	Benadryl	7	2.28073	1.08974	4.77336	0.03691	0.62222
Product (drug)	Zantac	7	1.73076	0.82697	3.62229	0.13238	0.62222
Product (drug)	Prilosec	7	1.49574	0.71468	3.13041	0.24468	0.62222
Product (drug)	Fentanyl	7	1.47613	0.70531	3.08935	0.25055	0.62222
Product (drug)	Zoloft	7	1.19755	0.57221	2.5063	0.53363	0.62222
Product (drug)	Atenolol	7	0.92175	0.44043	1.92909	1	0.62222
Product (drug)	Novantron	6	451.332	200.807	1014.41	0	0.53333
Product (drug)	Bcnu	6	301.884	134.839	675.872	0	0.53333
Product (drug)	Melfalan	6	197.764	88.574	441.557	0	0.53333
Product (drug)	Cladribine	6	140.045	62.8181	312.211	0	0.53333
Product (drug)	Etoposido	6	117.638	52.7983	262.103	0	0.53333
Product (drug)	Mitoxantrone hydrochloride	6	96.2715	43.233	214.378	0	0.53333
Product (drug)	Melphalan hydrochloride	6	92.3699	41.4852	205.668	0	0.53333
Product (drug)	Solu cortef	6	66.2085	29.756	147.317	0	0.53333
Product (drug)	Itrizole	6	53.5973	24.0962	119.217	0	0.53333
Product (drug)	Sirolimus	6	24.2471	10.9094	53.8912	0	0.53333
Product (drug)	Diphenhydramine Hcl	6	15.1999	6.84048	33.775	0	0.53333
Product (drug)	Kytril	6	12.8588	5.78727	28.5712	1e-05	0.53333
Product (drug)	Magmitt	6	10.8573	4.88674	24.1228	2e-05	0.53333
Product (drug)	Loxonin	6	9.45835	4.25723	21.0138	5e-05	0.53333
Product (drug)	Procrit	6	6.73879	3.03336	14.9706	0.00032	0.53333
Product (drug)	Aciclovir	6	6.24745	2.81223	13.8789	0.00048	0.53333
Product (drug)	Colchicine	6	6.21085	2.79576	13.7976	0.00049	0.53333
Product (drug)	Valtrex	6	5.16246	2.3239	11.4682	0.00127	0.53333
Product (drug)	Atrovent	6	4.35632	1.96106	9.6772	0.00294	0.53333
Product (drug)	Zofran	6	2.03158	0.9146	4.5127	0.07904	0.53333
Product (drug)	Ambien	6	1.96608	0.88511	4.3672	0.13603	0.53333
Product (drug)	Bactrim	6	1.84176	0.82915	4.09105	0.1501	0.53333
Product (drug)	Zocor	6	1.40895	0.63431	3.12963	0.33023	0.53333
Product (drug)	Esomeprazole	6	0.66675	0.30017	1.48098	0.40187	0.53333
Product (drug)	Lyrica	6	0.66015	0.2972	1.46632	0.40261	0.53333
Product (drug)	Indium (111 in) ibritumomab tiuxetan	6	N/A	N/A	N/A	N/A	0.53333
Product (drug)	Carmustina	5	660.645	270.355	1614.37	0	0.44444
Product (drug)	Pirarubicin	5	326.07	134.713	789.244	0	0.44444
Product (drug)	Restamin	5	75.8983	31.5829	182.395	0	0.44444
Product (drug)	Paracetamolo	5	40.3689	16.8156	96.913	0	0.44444
Product (drug)	Trimeton	5	33.0036	13.7505	79.2144	0	0.44444
Product (drug)	Vinorelbine	5	28.7672	11.9869	69.0379	0	0.44444
Product (drug)	Cisplatino	5	24.492	10.2068	58.7707	0	0.44444
Product (drug)	Alkeran	5	21.3651	8.90446	51.2627	0	0.44444
Product (drug)	Solu-cortef	5	18.1236	7.5542	43.4812	1e-05	0.44444
Product (drug)	Brufen	5	4.46356	1.86121	10.7045	0.00583	0.44444
Product (drug)	Famotidine	5	3.43853	1.43384	8.24602	0.01643	0.44444
Product (drug)	Lisinopril	5	0.44271	0.18462	1.06159	0.06977	0.44444
Product (drug)	Percocet	5	2.26343	0.94386	5.4278	0.0733	0.44444
Product (drug)	Lipitor	5	0.46642	0.19451	1.11844	0.08906	0.44444
Product (drug)	Paracetamol	5	0.48607	0.20271	1.16557	0.11474	0.44444
Product (drug)	Metronidazole	5	1.77701	0.74103	4.26129	0.21401	0.44444
Product (drug)	Diovan	5	1.63305	0.681	3.91605	0.24162	0.44444
Product (drug)	Potassium chloride	5	1.42263	0.59326	3.41145	0.41111	0.44444
Product (drug)	Seroquel xr	5	1.35496	0.56504	3.24918	0.42748	0.44444
Product (drug)	Ledervorin	4	4675.34	1526.77	14317	0	0.35556
Product (drug)	Mycosyst	4	251.154	93.6657	673.444	0	0.35556
Product (drug)	Cyclophosphamide monohydrate	4	80.9313	30.3481	215.825	0	0.35556
Product (drug)	Gran	4	46.2552	17.3645	123.214	0	0.35556
Product (drug)	Pegfilgrastim	4	19.4245	7.29839	51.6981	6e-05	0.35556
Product (drug)	Maglax	4	15.5605	5.84729	41.4089	0.00015	0.35556
Product (drug)	Pursennid	4	15.5327	5.83683	41.3348	0.00015	0.35556
Product (drug)	Methycobal	4	13.7603	5.17112	36.6162	0.00024	0.35556
Product (drug)	Mesna	4	12.301	4.62293	32.7314	0.00036	0.35556
Product (drug)	Megace	4	9.80312	3.68448	26.0827	0.00083	0.35556
Product (drug)	Bortezomib	4	8.42053	3.16497	22.4031	0.00145	0.35556
Product (drug)	K-dur	4	8.32594	3.12943	22.1514	0.00151	0.35556
Product (drug)	Epogen	4	7.2022	2.70715	19.161	0.00255	0.35556
Product (drug)	Bayaspirin	4	4.53239	1.70378	12.0571	0.01258	0.35556
Product (drug)	Glucotrol	4	4.04899	1.52208	10.771	0.01821	0.35556
Product (drug)	Gemcitabine	4	3.60987	1.35703	9.6027	0.02628	0.35556
Product (drug)	Nasonex	4	3.26122	1.22598	8.67515	0.03604	0.35556
Product (drug)	Colace	4	2.78268	1.0461	7.40209	0.05794	0.35556
Product (drug)	Zyloric	4	2.75344	1.03511	7.32428	0.05974	0.35556
Product (drug)	Simvastatin	4	0.41915	0.15759	1.11489	0.07259	0.35556
Product (drug)	Prochlorperazine	4	2.38556	0.89682	6.34564	0.08961	0.35556
Product (drug)	Lanoxin	4	2.09772	0.78862	5.57993	0.12633	0.35556
Product (drug)	Phenytoin	4	1.96684	0.73942	5.23177	0.14887	0.35556
Product (drug)	Potassium	4	1.80918	0.68015	4.81236	0.18267	0.35556
Product (drug)	Amlodipine	4	0.53282	0.20032	1.41723	0.26833	0.35556
Product (drug)	Acyclovir	4	1.79767	0.67583	4.78176	0.29327	0.35556
Product (drug)	Levothyroxine sodium	4	1.42304	0.53499	3.78519	0.37038	0.35556
Product (drug)	Hydrochlorothiazide	4	0.65923	0.24784	1.75346	0.54039	0.35556
Product (drug)	Fish oil	4	1.22423	0.46025	3.25635	0.57473	0.35556
Product (drug)	Xanax	4	0.73653	0.2769	1.95909	0.82721	0.35556
Product (drug)	Yttrium	3	1899.36	572.747	6298.69	0	0.26667
Product (drug)	Ifomide	3	161.647	51.8995	503.47	0	0.26667
Product (drug)	Leustatin	3	110.642	35.5907	343.956	0	0.26667
Product (drug)	Etoposide Teva	3	96.1699	30.9521	298.806	0	0.26667
Product (drug)	Chlorambucil	3	26.319	8.49276	81.5625	0.00023	0.26667
Product (drug)	Mycophenolate	3	20.7674	6.70274	64.3449	0.00045	0.26667
Product (drug)	Prednisolona	3	20.2149	6.52453	62.6315	0.00049	0.26667
Product (drug)	Famvir	3	18.1179	5.84815	56.13	0.00067	0.26667
Product (drug)	Treanda	3	16.6793	5.3841	51.6705	0.00085	0.26667
Product (drug)	Oxybutynin chloride	3	13.3561	4.31192	41.3706	0.0016	0.26667
Product (drug)	Mucodyne	3	12.8118	4.13627	39.6838	0.0018	0.26667
Product (drug)	Baraclude	3	10.9842	3.54647	34.0206	0.00277	0.26667
Product (drug)	Harnal	3	8.30773	2.68258	25.7283	0.00599	0.26667
Product (drug)	Therapeutic radiopharmaceuticals	3	8.1169	2.62098	25.1372	0.00639	0.26667
Product (drug)	Blopress	3	6.36655	2.05592	19.7153	0.01228	0.26667
Product (drug)	Lescol	3	5.80621	1.87501	17.9796	0.01567	0.26667
Product (drug)	Senokot	3	5.50139	1.7766	17.0356	0.01804	0.26667
Product (drug)	Ms contin	3	5.37047	1.73432	16.6301	0.0192	0.26667
Product (drug)	Corticosteroids	3	4.16678	1.34567	12.9022	0.03658	0.26667
Product (drug)	Revlimid	3	0.33094	0.10689	1.02459	0.04276	0.26667
Product (drug)	Zovirax	3	3.62963	1.17222	11.2387	0.05126	0.26667
Product (drug)	Cravit	3	3.58651	1.15829	11.1052	0.05276	0.26667
Product (drug)	Imdur	3	3.50542	1.13211	10.8541	0.05573	0.26667
Product (drug)	Restasis	3	2.93054	0.94647	9.07381	0.08465	0.26667
Product (drug)	Mobic	3	2.80038	0.90443	8.67075	0.0938	0.26667
Product (drug)	Magnesium oxide	3	2.78141	0.89831	8.61202	0.09524	0.26667
Product (drug)	Furosemide	3	0.38415	0.12408	1.18933	0.10204	0.26667
Product (drug)	Pravachol	3	2.48336	0.80206	7.68908	0.12219	0.26667
Product (drug)	Metoprolol	3	0.42072	0.13589	1.30254	0.13343	0.26667
Product (drug)	Norco	3	2.33062	0.75273	7.21611	0.13988	0.26667
Product (drug)	Reglan	3	2.19568	0.70915	6.79829	0.15835	0.26667
Product (drug)	Metoprolol succinate	3	2.11627	0.68351	6.55241	0.1707	0.26667
Product (drug)	Gabapentin	3	0.44552	0.1439	1.37934	0.17614	0.26667
Product (drug)	Afinitor	3	1.98306	0.64048	6.13991	0.19431	0.26667
Product (drug)	Amaryl	3	1.87013	0.60402	5.79026	0.21767	0.26667
Product (drug)	Glyburide	3	1.85786	0.60005	5.75226	0.22041	0.26667
Product (drug)	Lactulose	3	1.8483	0.59696	5.72264	0.22258	0.26667
Product (drug)	Spiriva	3	0.4577	0.14784	1.41705	0.23416	0.26667
Product (drug)	Crestor	3	0.45648	0.14744	1.41328	0.23453	0.26667
Product (drug)	Meloxicam	3	1.75731	0.56758	5.4409	0.24463	0.26667
Product (drug)	Magnesium	3	1.67973	0.54252	5.2007	0.26561	0.26667
Product (drug)	Levofloxacin	3	1.67215	0.54007	5.17723	0.26777	0.26667
Product (drug)	Digoxin	3	0.5431	0.17542	1.68145	0.39131	0.26667
Product (drug)	Nifedipine	3	1.32332	0.42742	4.09715	0.49865	0.26667
Product (drug)	Hydroxychloroquine	3	1.28741	0.41582	3.98595	0.5091	0.26667
Product (drug)	Vancomycin	3	1.24982	0.40367	3.86955	0.52095	0.26667
Product (drug)	Ondansetron	3	1.24504	0.40213	3.85476	0.52253	0.26667
Product (drug)	Claritin	3	1.21871	0.39363	3.77324	0.74136	0.26667
Product (drug)	Glucophage	3	0.99512	0.32141	3.08097	1	0.26667
Product (drug)	Zyrtec	3	0.97289	0.31423	3.01212	1	0.26667
Product (drug)	Ciprofloxacin	3	0.79709	0.25745	2.46782	1	0.26667
Product (drug)	Paxil	3	0.76597	0.2474	2.37148	1	0.26667
Product (drug)	Yttrium (90 y) chloride	2	30389.7	2757.47	334920	0	0.17778
Product (drug)	Motexafin gadolinium	2	3038.97	666.599	13854.4	0	0.17778
Product (drug)	Millis	2	607.794	148.067	2494.9	1e-05	0.17778
Product (drug)	Hartmann	2	379.871	93.4945	1543.43	1e-05	0.17778
Product (drug)	Anthracyclines and related substances	2	316.559	78.135	1282.52	2e-05	0.17778
Product (drug)	Pyrinazin	2	276.27	68.3149	1117.25	3e-05	0.17778
Product (drug)	Azulene-glutamine	2	259.741	64.2757	1049.62	3e-05	0.17778
Product (drug)	K-phos	2	215.53	53.4421	869.222	4e-05	0.17778
Product (drug)	Mitoxantrona	2	215.53	53.4421	869.222	4e-05	0.17778
Product (drug)	Isodine	2	160.792	39.9686	646.859	8e-05	0.17778
Product (drug)	Equate	2	114.678	28.5657	460.379	0.00015	0.17778
Product (drug)	Gm-csf	2	61.2695	15.2991	245.371	0.00052	0.17778
Product (drug)	Blood and related products	2	50.9894	12.7381	204.106	0.00075	0.17778
Product (drug)	Levopraid	2	48.7796	12.1873	195.241	0.00082	0.17778
Product (drug)	Etopophos	2	46.045	11.5055	184.273	0.00092	0.17778
Product (drug)	Arzerra	2	45.9059	11.4708	183.715	0.00093	0.17778
Product (drug)	Levact	2	43.8524	10.9587	175.48	0.00101	0.17778
Product (drug)	Senokot-s	2	43.2286	10.8031	172.979	0.00104	0.17778
Product (drug)	Cylocide	2	43.1059	10.7725	172.487	0.00105	0.17778
Product (drug)	Sitagliptin Phosphate	2	41.0671	10.264	164.314	0.00115	0.17778
Product (drug)	Vincristin	2	40.3046	10.0737	161.257	0.00119	0.17778
Product (drug)	Herbesser	2	39.0112	9.75101	156.073	0.00127	0.17778
Product (drug)	Juvela n	2	36.3513	9.08727	145.414	0.00146	0.17778
Product (drug)	Leukeran	2	29.5907	7.39952	118.334	0.00219	0.17778
Product (drug)	Bleomycin sulfate	2	27.5769	6.89655	110.27	0.00251	0.17778
Product (drug)	Peri-colace	2	25.9298	6.48513	103.676	0.00283	0.17778
Product (drug)	Uft	2	25.2406	6.31297	100.917	0.00298	0.17778
Product (drug)	Radiotherapy	2	24.4881	6.12496	97.9052	0.00316	0.17778
Product (drug)	Lysine	2	24.0806	6.02315	96.2743	0.00327	0.17778
Product (drug)	Pl	2	23.5214	5.88344	94.0364	0.00342	0.17778
Product (drug)	Fibercon	2	23.305	5.82936	93.1701	0.00348	0.17778
Product (drug)	Lastet	2	21.9104	5.48087	87.5891	0.00393	0.17778
Product (drug)	Leukine	2	21.7691	5.44557	87.0239	0.00398	0.17778
Product (drug)	Bio-three	2	21.5377	5.38774	86.0978	0.00406	0.17778
Product (drug)	Pacerone	2	21.4616	5.36873	85.7935	0.00409	0.17778
Product (drug)	Desametasone	2	20.6873	5.17521	82.6953	0.00439	0.17778
Product (drug)	Metilprednisolona	2	20.2193	5.05825	80.8228	0.00459	0.17778
Product (drug)	Vp-16	2	20.0328	5.01161	80.0763	0.00467	0.17778
Product (drug)	Insulins and analogues	2	17.5359	4.38747	70.0876	0.00604	0.17778
Product (drug)	Renivace	2	17.3655	4.34488	69.4062	0.00615	0.17778
Product (drug)	Interferon alfa	2	16.1048	4.02967	64.3635	0.00711	0.17778
Product (drug)	Coniel	2	15.7296	3.93587	62.8633	0.00743	0.17778
Product (drug)	Sotalol hcl	2	15.3251	3.83472	61.2454	0.00781	0.17778
Product (drug)	Anzemet	2	14.2274	3.56022	56.8556	0.00901	0.17778
Product (drug)	Marinol	2	13.953	3.49161	55.7585	0.00935	0.17778
Product (drug)	Darbepoetin alfa	2	13.9083	3.48043	55.5797	0.0094	0.17778
Product (drug)	Ciclosporina	2	12.8064	3.20486	51.1739	0.011	0.17778
Product (drug)	Alfarol	2	12.4599	3.11818	49.7883	0.01159	0.17778
Product (drug)	Phoslo	2	12.4446	3.11435	49.7271	0.01162	0.17778
Product (drug)	Allelock	2	12.0355	3.01204	48.0916	0.01237	0.17778
Product (drug)	Miya bm	2	11.1727	2.79621	44.6421	0.01424	0.17778
Product (drug)	Thymoglobuline	2	11.1195	2.78292	44.4297	0.01436	0.17778
Product (drug)	Ibuprofen	2	0.23372	0.05852	0.93341	0.01552	0.17778
Product (drug)	Interferon	2	10.6631	2.66873	42.6048	0.01554	0.17778
Product (drug)	Timolol maleate	2	9.36508	2.34401	37.4165	0.01981	0.17778
Product (drug)	Soldesam	2	9.15904	2.29246	36.593	0.02064	0.17778
Product (drug)	Solumedrol	2	8.99902	2.25243	35.9534	0.02133	0.17778
Product (drug)	Doxil	2	8.74523	2.18893	34.939	0.02249	0.17778
Product (drug)	Metotrexato	2	7.54836	1.88946	30.1556	0.02948	0.17778
Product (drug)	Sorafenib	2	7.40309	1.85311	29.5751	0.03054	0.17778
Product (drug)	Aztreonam	2	7.25464	1.81596	28.9818	0.03169	0.17778
Product (drug)	Gaster d	2	6.56223	1.64269	26.2149	0.038	0.17778
Product (drug)	Myslee	2	6.18809	1.54906	24.7198	0.04223	0.17778
Product (drug)	Everolimus	2	5.95176	1.48991	23.7755	0.04527	0.17778
Product (drug)	Guaifenesin	2	5.40165	1.35224	21.5774	0.05376	0.17778
Product (drug)	Lantus	2	0.28568	0.07153	1.14092	0.05587	0.17778
Product (drug)	Adriamycin pfs	2	5.28057	1.32193	21.0937	0.05594	0.17778
Product (drug)	Voriconazole	2	5.21532	1.3056	20.833	0.05717	0.17778
Product (drug)	Epirubicin hydrochloride	2	5.1256	1.28315	20.4745	0.05894	0.17778
Product (drug)	Nivolumab	2	4.42289	1.10727	17.6669	0.07606	0.17778
Product (drug)	Plavix	2	0.29729	0.07444	1.18726	0.07745	0.17778
Product (drug)	Vitamin d	2	0.29463	0.07377	1.17663	0.0782	0.17778
Product (drug)	Carafate	2	4.01927	1.00624	16.0543	0.08947	0.17778
Product (drug)	Claritin-d	2	3.70742	0.92818	14.8085	0.10239	0.17778
Product (drug)	Cymbalta	2	0.32937	0.08247	1.31541	0.10356	0.17778
Product (drug)	Celebrex	2	0.315	0.07887	1.25801	0.10587	0.17778
Product (drug)	Isosorbide	2	3.34063	0.83636	13.3432	0.12146	0.17778
Product (drug)	Gemcitabine hydrochloride	2	3.30251	0.82682	13.1909	0.12374	0.17778
Product (drug)	Cyclosporine	2	3.26876	0.81838	13.0561	0.12581	0.17778
Product (drug)	Antibiotics	2	3.22027	0.80624	12.8624	0.12888	0.17778
Product (drug)	Thyroid	2	3.21278	0.80436	12.8325	0.12936	0.17778
Product (drug)	Mopral	2	3.17055	0.79379	12.6638	0.13214	0.17778
Product (drug)	Hytrin	2	3.14626	0.78771	12.5667	0.13377	0.17778
Product (drug)	Hyzaar	2	3.12587	0.7826	12.4853	0.13517	0.17778
Product (drug)	Bactrim ds	2	3.06595	0.76761	12.2459	0.13941	0.17778
Product (drug)	Tavanic	2	2.83248	0.70916	11.3133	0.15792	0.17778
Product (drug)	Emend	2	2.81751	0.70541	11.2535	0.15923	0.17778
Product (drug)	Adriamycin	2	2.62523	0.65728	10.4854	0.17756	0.17778
Product (drug)	Vitamin b6	2	2.55225	0.63901	10.1939	0.18533	0.17778
Product (drug)	Atorvastatin	2	0.37927	0.09497	1.5147	0.18979	0.17778
Product (drug)	Prozac	2	0.36002	0.09015	1.43781	0.19434	0.17778
Product (drug)	Klor-con	2	2.45019	0.61346	9.7862	0.19707	0.17778
Product (drug)	Concor	2	2.4071	0.60267	9.6141	0.20235	0.17778
Product (drug)	Glucosamine	2	2.33533	0.5847	9.32741	0.21162	0.17778
Product (drug)	Senna	2	2.31876	0.58056	9.26122	0.21385	0.17778
Product (drug)	Solu-medrol	2	2.29998	0.57585	9.18621	0.21641	0.17778
Product (drug)	Biaxin	2	2.25778	0.56529	9.01762	0.22234	0.17778
Product (drug)	Trazodone hcl	2	2.23503	0.55959	8.92675	0.22564	0.17778
Product (drug)	Co-trimoxazole	2	2.17894	0.54555	8.70272	0.23408	0.17778
Product (drug)	Losartan potassium	2	2.16112	0.54109	8.63154	0.23685	0.17778
Product (drug)	Trileptal	2	2.1063	0.52737	8.41256	0.2457	0.17778
Product (drug)	Buspar	2	2.07566	0.51969	8.29016	0.25085	0.17778
Product (drug)	Levoxyl	2	2.01056	0.5034	8.03016	0.26233	0.17778
Product (drug)	Altace	2	1.93233	0.48381	7.71764	0.27715	0.17778
Product (drug)	Pariet	2	1.91311	0.479	7.64087	0.28098	0.17778
Product (drug)	Oxycodone hcl	2	1.89261	0.47387	7.55902	0.28514	0.17778
Product (drug)	Methadone	2	1.88335	0.47155	7.52201	0.28705	0.17778
Product (drug)	Amlodipine besylate	2	1.88288	0.47143	7.52014	0.28714	0.17778
Product (drug)	Fenofibrate	2	1.87707	0.46998	7.49692	0.28835	0.17778
Product (drug)	Pantozol	2	1.80397	0.45168	7.20496	0.30418	0.17778
Product (drug)	Flovent	2	1.71606	0.42967	6.85381	0.32491	0.17778
Product (drug)	Mycophenolate mofetil	2	1.67446	0.41925	6.68764	0.33541	0.17778
Product (drug)	Warfarin	2	0.45392	0.11366	1.81283	0.34056	0.17778
Product (drug)	Pepcid	2	1.64198	0.41112	6.55791	0.34395	0.17778
Product (drug)	Cardizem	2	1.5114	0.37843	6.03636	0.38149	0.17778
Product (drug)	Venlafaxine	2	1.4169	0.35477	5.65892	0.41225	0.17778
Product (drug)	Singulair	2	0.50832	0.12728	2.03007	0.45176	0.17778
Product (drug)	Diazepam	2	0.4944	0.12379	1.97448	0.45271	0.17778
Product (drug)	Lamictal	2	0.56662	0.14188	2.26293	0.59497	0.17778
Product (drug)	Abilify	2	0.56588	0.14169	2.25998	0.595	0.17778
Product (drug)	Ceftriaxone	2	0.54869	0.13739	2.19131	0.59646	0.17778
Product (drug)	Insulin	2	0.53519	0.13401	2.13739	0.59858	0.17778
Product (drug)	Fosamax	2	0.51352	0.12858	2.05085	0.60398	0.17778
Product (drug)	Zestril	2	1.37966	0.34544	5.51016	0.65971	0.17778
Product (drug)	Diphenhydramine	2	1.33763	0.33492	5.34232	0.66465	0.17778
Product (drug)	Vitamin e	2	1.27127	0.31831	5.07725	0.67365	0.17778
Product (drug)	Hydrocodone	2	1.2135	0.30384	4.84652	0.6828	0.17778
Product (drug)	Ferrous sulfate	2	1.18078	0.29565	4.71583	0.68857	0.17778
Product (drug)	Hydrocortisone	2	1.16098	0.29069	4.63673	0.69229	0.17778
Product (drug)	Doxycycline	2	1.1197	0.28036	4.47187	0.70059	0.17778
Product (drug)	Erythromycin	2	1.11788	0.2799	4.46463	0.70097	0.17778
Product (drug)	Coreg	2	1.07956	0.27031	4.31157	0.70942	0.17778
Product (drug)	Aldactone	2	1.07635	0.2695	4.29874	0.71016	0.17778
Product (drug)	Oxaliplatin	2	1.01556	0.25428	4.05595	0.72518	0.17778
Product (drug)	Morphine	2	0.64082	0.16046	2.55927	0.77619	0.17778
Product (drug)	Levaquin	2	0.96258	0.24102	3.84435	1	0.17778
Product (drug)	Flonase	2	0.96067	0.24054	3.8367	1	0.17778
Product (drug)	Lovenox	2	0.94704	0.23713	3.78229	1	0.17778
Product (drug)	Clindamycin	2	0.92275	0.23105	3.68524	1	0.17778
Product (drug)	Morphine sulfate	2	0.87412	0.21887	3.49104	1	0.17778
Product (drug)	Metoprolol tartrate	2	0.82114	0.20561	3.27945	1	0.17778
Product (drug)	Vitamin d3	2	0.80101	0.20057	3.19906	1	0.17778
Product (drug)	Warfarin sodium	2	0.72386	0.18125	2.8909	1	0.17778
Product (drug)	Viagra	2	0.71242	0.17838	2.84522	1	0.17778
Product (drug)	Ibritumomab tiuxetan;Indium (111 in)	2	N/A	N/A	N/A	N/A	0.17778
Product (drug)	Yttrium y-90 ibritumomab tiuxetan	2	N/A	N/A	N/A	N/A	0.17778
Product (drug)	Zevalin Kit fur die Herstel. eines Radiother.	2	N/A	N/A	N/A	N/A	0.17778
Product (drug)	Humira	1	0.04031	0.00568	0.28589	0	0.08889
Product (drug)	Enbrel	1	0.0364	0.00513	0.25818	0	0.08889
Product (drug)	Bio insulin	1	15194.8	950.957	242790	0.00013	0.08889
Product (drug)	Motexafin	1	15194.8	950.957	242790	0.00013	0.08889
Product (drug)	Norflurane	1	15194.8	950.957	242790	0.00013	0.08889
Product (drug)	Prednimustina	1	15194.8	950.957	242790	0.00013	0.08889
Product (drug)	Capramol	1	7597.42	689.368	83730	0.0002	0.08889
Product (drug)	Fluprednisolona	1	7597.42	689.368	83730	0.0002	0.08889
Product (drug)	Adair	1	3038.97	355.312	25992.2	0.00039	0.08889
Product (drug)	Captomerck	1	3038.97	355.312	25992.2	0.00039	0.08889
Product (drug)	Cyclophosphamide;Doxorubicin;Prednisone;Rituximab;Vincristine	1	3038.97	355.312	25992.2	0.00039	0.08889
Product (drug)	DHAP	1	3038.97	355.312	25992.2	0.00039	0.08889
Product (drug)	Carmustine;Cytarabine;Etoposide;Melphalan	1	2532.47	305.124	21019.1	0.00046	0.08889
Product (drug)	Acv	1	1899.36	237.745	15174.1	0.00059	0.08889
Product (drug)	Seriphos	1	1519.48	194.667	11860.4	0.00072	0.08889
Product (drug)	Vicks cough	1	1168.83	153.027	8927.67	0.00092	0.08889
Product (drug)	Interleukin 12	1	799.729	107.147	5969.04	0.00132	0.08889
Product (drug)	Vancomycin mylan	1	723.564	97.4088	5374.72	0.00145	0.08889
Product (drug)	Perazolin	1	660.645	89.2923	4887.91	0.00158	0.08889
Product (drug)	Quinolone antibacterials	1	633.118	85.7207	4676.1	0.00164	0.08889
Product (drug)	Cytarabine kabi	1	562.772	76.5362	4138.07	0.00184	0.08889
Product (drug)	Glipizide;Metformin hydrochloride	1	562.772	76.5362	4138.07	0.00184	0.08889
Product (drug)	Methyl B12	1	562.772	76.5362	4138.07	0.00184	0.08889
Product (drug)	Co-Q10-Chlorella	1	523.96	71.4334	3843.22	0.00197	0.08889
Product (drug)	Dequalinium chloride	1	523.96	71.4334	3843.22	0.00197	0.08889
Product (drug)	Colony stimulating factors	1	474.839	64.9387	3472.07	0.00217	0.08889
Product (drug)	Therarubicin	1	460.45	63.0285	3363.78	0.00224	0.08889
Product (drug)	Cyclophosphamide;Doxorubicin;Prednisolone;Rituximab;Vincristine	1	446.907	61.2274	3262.04	0.0023	0.08889
Product (drug)	Lipids	1	446.907	61.2274	3262.04	0.0023	0.08889
Product (drug)	Tb1	1	410.671	56.3929	2990.64	0.0025	0.08889
Product (drug)	Clobesol	1	399.864	54.9467	2909.94	0.00256	0.08889
Product (drug)	Enfuvirtida	1	370.606	51.0212	2691.99	0.00276	0.08889
Product (drug)	Glynase mf	1	361.782	49.8345	2626.42	0.00283	0.08889
Product (drug)	Therapeutic multivitamins	1	353.368	48.7017	2563.96	0.00289	0.08889
Product (drug)	Combinations of antineoplastic agents	1	330.323	45.5925	2393.23	0.00309	0.08889
Product (drug)	Vepsid	1	292.209	40.4301	2111.94	0.00348	0.08889
Product (drug)	Nitrofuran	1	261.98	36.3178	1889.8	0.00388	0.08889
Product (drug)	Ibumax	1	253.247	35.1268	1825.79	0.00401	0.08889
Product (drug)	Acetamol	1	245.078	34.0115	1765.97	0.00414	0.08889
Product (drug)	Neufan	1	241.188	33.48	1737.51	0.0042	0.08889
Product (drug)	NaHCO3	1	233.767	32.4652	1683.25	0.00433	0.08889
Product (drug)	Dimeticone, activated	1	226.789	31.5102	1632.27	0.00447	0.08889
Product (drug)	Tositumomab-iodine 131	1	217.069	30.1785	1561.34	0.00466	0.08889
Product (drug)	Folic acid	1	0.11792	0.01662	0.83644	0.00474	0.08889
Product (drug)	Tositumomab	1	211.039	29.3516	1517.39	0.00479	0.08889
Product (drug)	CHOP	1	205.336	28.5687	1475.84	0.00492	0.08889
Product (drug)	Tipifarnib	1	202.598	28.1928	1455.9	0.00499	0.08889
Product (drug)	Nitrogen mustard	1	199.932	27.8266	1436.5	0.00505	0.08889
Product (drug)	Cymerin	1	189.936	26.4522	1363.8	0.00532	0.08889
Product (drug)	Glandomed	1	187.591	26.1295	1346.76	0.00538	0.08889
Product (drug)	Benadryl cough	1	178.763	24.914	1282.66	0.00564	0.08889
Product (drug)	Ms	1	174.653	24.3477	1252.84	0.00577	0.08889
Product (drug)	Propaderm	1	174.653	24.3477	1252.84	0.00577	0.08889
Product (drug)	Tiotepa	1	174.653	24.3477	1252.84	0.00577	0.08889
Product (drug)	Vitron c	1	172.669	24.0741	1238.45	0.00584	0.08889
Product (drug)	Ecural	1	165.161	23.0385	1184.03	0.0061	0.08889
Product (drug)	Cytarabine sandoz	1	129.87	18.1568	928.925	0.00774	0.08889
Product (drug)	K-phos neutral	1	125.577	17.5615	897.969	0.008	0.08889
Product (drug)	Cytarabine Ebewe	1	120.594	16.87	862.059	0.00832	0.08889
Product (drug)	Kepivance	1	96.7824	13.5597	690.785	0.01034	0.08889
Product (drug)	Leukovorin	1	96.1699	13.4744	686.386	0.01041	0.08889
Product (drug)	Bleo	1	93.7953	13.1437	669.336	0.01067	0.08889
Product (drug)	Hydroxydaunorubicin	1	93.2199	13.0636	665.205	0.01073	0.08889
Product (drug)	Bexxar	1	89.9103	12.6024	641.452	0.01113	0.08889
Product (drug)	Ampho Moronal	1	86.8277	12.1728	619.336	0.01152	0.08889
Product (drug)	Celtect	1	85.8466	12.036	612.3	0.01165	0.08889
Product (drug)	Allopurinol sodium	1	80.8236	11.3354	576.287	0.01236	0.08889
Product (drug)	Acetylsalicylic acid	1	0.1427	0.02012	1.0122	0.01274	0.08889
Product (drug)	Indometin	1	77.1312	10.8201	549.829	0.01295	0.08889
Product (drug)	Nitropen	1	72.0135	10.1055	513.178	0.01385	0.08889
Product (drug)	Alendros	1	70.0223	9.82738	498.925	0.01424	0.08889
Product (drug)	Slo-mag	1	70.0223	9.82738	498.925	0.01424	0.08889
Product (drug)	Osyrol	1	69.0675	9.69397	492.091	0.01444	0.08889
Product (drug)	Remestan	1	69.0675	9.69397	492.091	0.01444	0.08889
Product (drug)	Potassium phosphates	1	64.1133	9.00149	456.648	0.01554	0.08889
Product (drug)	Dexaltin	1	63.0491	8.85269	449.038	0.0158	0.08889
Product (drug)	Oxandrolone	1	62.0198	8.70874	441.677	0.01606	0.08889
Product (drug)	Propylene glycol	1	61.2695	8.60381	436.313	0.01625	0.08889
Product (drug)	Vepeside	1	59.5876	8.36853	424.29	0.01671	0.08889
Product (drug)	Winrho	1	58.8947	8.27159	419.338	0.0169	0.08889
Product (drug)	Procarbazine hydrochloride	1	51.5079	7.23758	366.568	0.01929	0.08889
Product (drug)	Uralyt	1	49.1743	6.9107	349.908	0.02019	0.08889
Product (drug)	Onco carbide	1	46.8977	6.59173	333.659	0.02116	0.08889
Product (drug)	Roferon a	1	46.7534	6.57151	332.63	0.02123	0.08889
Product (drug)	Excelase	1	42.3255	5.95083	301.041	0.02341	0.08889
Product (drug)	Flebocortid	1	39.5699	5.5644	281.392	0.02502	0.08889
Product (drug)	Serotone	1	38.3708	5.3962	272.844	0.02579	0.08889
Product (drug)	Ifosfamida	1	38.0823	5.35572	270.787	0.02598	0.08889
Product (drug)	Gamma globulin	1	37.9871	5.34237	270.109	0.02604	0.08889
Product (drug)	Etoposid	1	37.7043	5.30269	268.093	0.02624	0.08889
Product (drug)	Trilisate	1	37.611	5.2896	267.428	0.0263	0.08889
Product (drug)	Senna alexandrina	1	37.4257	5.26361	266.107	0.02643	0.08889
Product (drug)	Tenordate	1	35.8369	5.04067	254.784	0.02758	0.08889
Product (drug)	Didanosina	1	35.0112	4.92478	248.901	0.02822	0.08889
Product (drug)	Metaglip	1	34.2999	4.82495	243.833	0.0288	0.08889
Product (drug)	WinRho SDF	1	34.1457	4.80332	242.734	0.02892	0.08889
Product (drug)	Zymar	1	33.7663	4.75006	240.031	0.02924	0.08889
Product (drug)	Esanbutol	1	31.3296	4.40797	222.675	0.03148	0.08889
Product (drug)	Zyrtec-D 12 hour	1	31.2009	4.3899	221.758	0.03161	0.08889
Product (drug)	Espidifen	1	30.5117	4.29313	216.85	0.03231	0.08889
Product (drug)	Vincristine sulphate	1	29.1089	4.09611	206.862	0.03383	0.08889
Product (drug)	Vicclox	1	28.9978	4.08051	206.071	0.03396	0.08889
Product (drug)	Metilprednisolone	1	28.5617	4.01926	202.966	0.03447	0.08889
Product (drug)	Lomustine	1	28.4548	4.00423	202.204	0.0346	0.08889
Product (drug)	Diovane	1	27.9317	3.93076	198.481	0.03523	0.08889
Product (drug)	Tinset	1	27.9317	3.93076	198.481	0.03523	0.08889
Product (drug)	Adriblastine	1	27.3289	3.84607	194.189	0.03599	0.08889
Product (drug)	Amifostine	1	26.5644	3.73867	188.748	0.03701	0.08889
Product (drug)	Potassium iodide	1	26.0632	3.66825	185.181	0.0377	0.08889
Product (drug)	Folate sodium	1	25.157	3.54092	178.732	0.03903	0.08889
Product (drug)	Urecholine	1	25.1154	3.53507	178.436	0.0391	0.08889
Product (drug)	Roxanol	1	24.8282	3.49471	176.392	0.03954	0.08889
Product (drug)	Itraconazol	1	24.7473	3.48334	175.817	0.03967	0.08889
Product (drug)	Neo minophagen c	1	24.3117	3.42213	172.717	0.04036	0.08889
Product (drug)	Drisdol	1	23.8913	3.36303	169.726	0.04105	0.08889
Product (drug)	Saxizon	1	22.7809	3.20696	161.826	0.04301	0.08889
Product (drug)	Myser	1	22.6451	3.18787	160.86	0.04326	0.08889
Product (drug)	Nitroquick	1	21.104	2.97121	149.897	0.04634	0.08889
Product (drug)	Glycyron	1	20.8434	2.93458	148.044	0.04691	0.08889
Product (drug)	Mst	1	20.2328	2.84873	143.702	0.04829	0.08889
Product (drug)	Capsaicin	1	20.0724	2.82618	142.561	0.04866	0.08889
Product (drug)	Pantosin	1	19.2828	2.71513	136.946	0.0506	0.08889
Product (drug)	Platelets, human blood	1	19.0412	2.68115	135.228	0.05122	0.08889
Product (drug)	Dexamethasone acetate	1	18.8756	2.65786	134.05	0.05166	0.08889
Product (drug)	Meperidine hcl	1	18.0461	2.54121	128.153	0.05397	0.08889
Product (drug)	Meilax	1	17.689	2.49097	125.614	0.05503	0.08889
Product (drug)	Methylprednisolone acetate	1	17.3655	2.44547	123.314	0.05602	0.08889
Product (drug)	Pentamidine isethionate	1	17.3259	2.4399	123.033	0.05614	0.08889
Product (drug)	Valacyclovir hcl	1	17.2082	2.42334	122.196	0.05652	0.08889
Product (drug)	Obinutuzumab	1	17.0921	2.407	121.37	0.05689	0.08889
Product (drug)	Ginseng	1	17.0729	2.4043	121.234	0.05695	0.08889
Product (drug)	Cyclosporin a	1	16.5161	2.32599	117.276	0.05881	0.08889
Product (drug)	Micafungin	1	16.1992	2.2814	115.023	0.05993	0.08889
Product (drug)	Preservision	1	16.0452	2.25974	113.929	0.06048	0.08889
Product (drug)	Ofatumumab	1	15.861	2.23382	112.62	0.06116	0.08889
Product (drug)	Tazobactam	1	15.861	2.23382	112.62	0.06116	0.08889
Product (drug)	Ampho-moronal	1	15.5845	2.19491	110.654	0.06221	0.08889
Product (drug)	Benefiber	1	15.1192	2.12945	107.348	0.06406	0.08889
Product (drug)	Antiemetics and antinauseants	1	14.4851	2.04022	102.841	0.06677	0.08889
Product (drug)	Clemastine	1	14.3078	2.01526	101.581	0.06757	0.08889
Product (drug)	Sawacillin	1	13.7386	1.93516	97.536	0.07026	0.08889
Product (drug)	Alositol	1	12.877	1.81391	91.4142	0.07478	0.08889
Product (drug)	Interferon alfa-2b	1	12.5267	1.7646	88.9253	0.07679	0.08889
Product (drug)	Pydoxal	1	12.4548	1.75448	88.4146	0.07721	0.08889
Product (drug)	Permax	1	11.9644	1.68546	84.931	0.08024	0.08889
Product (drug)	Acetaminophen;codeine	1	11.834	1.6671	84.0043	0.08109	0.08889
Product (drug)	Gadolinium	1	11.5991	1.63403	82.3358	0.08266	0.08889
Product (drug)	Loperamide hcl	1	11.5287	1.62412	81.8357	0.08315	0.08889
Product (drug)	Citrucel	1	10.9869	1.54785	77.9867	0.08706	0.08889
Product (drug)	Flomox	1	10.4432	1.4713	74.125	0.09138	0.08889
Product (drug)	Amoban	1	10.4289	1.46928	74.0232	0.09149	0.08889
Product (drug)	Dogmatyl	1	10.379	1.46226	73.669	0.09191	0.08889
Product (drug)	Sennoside a+b	1	10.3437	1.45729	73.4181	0.09221	0.08889
Product (drug)	Scopolamine	1	10.0429	1.41494	71.2816	0.09484	0.08889
Product (drug)	Ara-c	1	9.57457	1.349	67.9558	0.09923	0.08889
Product (drug)	Levsin	1	9.47309	1.33471	67.2351	0.10024	0.08889
Product (drug)	Humalog	1	0.21496	0.0303	1.52474	0.10095	0.08889
Product (drug)	Premarin	1	0.21277	0.03	1.50926	0.10138	0.08889
Product (drug)	Lac-b	1	9.23138	1.30068	65.5185	0.10273	0.08889
Product (drug)	Erythropoietin	1	9.18117	1.29361	65.162	0.10326	0.08889
Product (drug)	Iscotin	1	9.15904	1.29049	65.0048	0.10349	0.08889
Product (drug)	Os Cal	1	9.04455	1.27437	64.1917	0.10473	0.08889
Product (drug)	Kalinor	1	9.01236	1.26984	63.9632	0.10508	0.08889
Product (drug)	Onealfa	1	8.99635	1.26758	63.8495	0.10526	0.08889
Product (drug)	Levothyroxine	1	0.20308	0.02863	1.44051	0.10557	0.08889
Product (drug)	Famciclovir	1	8.91716	1.25643	63.2871	0.10614	0.08889
Product (drug)	Clarith	1	8.65803	1.21994	61.447	0.10914	0.08889
Product (drug)	Laxoberon	1	8.40888	1.18485	59.6778	0.11218	0.08889
Product (drug)	Neutrogin	1	8.39494	1.18289	59.5788	0.11236	0.08889
Product (drug)	Physiotens	1	8.21343	1.15733	58.2899	0.11469	0.08889
Product (drug)	Ferrlecit	1	8.08667	1.13947	57.3898	0.11638	0.08889
Product (drug)	Doxepin hydrochloride	1	7.78424	1.09688	55.2425	0.12062	0.08889
Product (drug)	Platinol	1	7.72881	1.08907	54.8489	0.12143	0.08889
Product (drug)	Cisplatine	1	7.6356	1.07595	54.1871	0.12281	0.08889
Product (drug)	Prednisolone acetate	1	7.56339	1.06578	53.6744	0.12391	0.08889
Product (drug)	Penicillin	1	7.18093	1.01191	50.959	0.13006	0.08889
Product (drug)	Iscover	1	7.14379	1.00668	50.6953	0.13069	0.08889
Product (drug)	Digitek	1	7.05424	0.99406	50.0596	0.13223	0.08889
Product (drug)	Ranitidine hcl	1	6.94463	0.97862	49.2813	0.13417	0.08889
Product (drug)	Novantrone	1	6.91933	0.97506	49.1017	0.13463	0.08889
Product (drug)	Augmentine	1	6.91303	0.97417	49.057	0.13474	0.08889
Product (drug)	Alemtuzumab	1	6.72041	0.94704	47.6895	0.13832	0.08889
Product (drug)	Mcp	1	6.69967	0.94412	47.5422	0.13872	0.08889
Product (drug)	Ranitidine	1	0.23559	0.03321	1.67112	0.14151	0.08889
Product (drug)	Selenium	1	6.46039	0.91041	45.8436	0.14347	0.08889
Product (drug)	Valganciclovir	1	6.42488	0.90541	45.5915	0.1442	0.08889
Product (drug)	Doxepin hcl	1	6.40052	0.90198	45.4186	0.1447	0.08889
Product (drug)	Bonalon	1	6.28926	0.88631	44.6287	0.14707	0.08889
Product (drug)	Rifadin	1	6.02014	0.8484	42.7183	0.15311	0.08889
Product (drug)	Ace inhibitors	1	5.75562	0.81113	40.8406	0.15955	0.08889
Product (drug)	Cartia xt	1	5.65916	0.79754	40.1559	0.16203	0.08889
Product (drug)	Vitamin b-complex, plain	1	5.62147	0.79223	39.8884	0.16303	0.08889
Product (drug)	Morphine sulphate	1	5.59869	0.78902	39.7267	0.16363	0.08889
Product (drug)	Pilocarpine	1	5.5254	0.7787	39.2064	0.16561	0.08889
Product (drug)	Steroids	1	5.37871	0.75803	38.1652	0.16972	0.08889
Product (drug)	Ogen	1	5.24865	0.73971	37.242	0.17354	0.08889
Product (drug)	Topotecan	1	5.23419	0.73767	37.1394	0.17397	0.08889
Product (drug)	Daypro	1	5.18242	0.73038	36.7719	0.17555	0.08889
Product (drug)	Emla	1	5.1473	0.72543	36.5227	0.17663	0.08889
Product (drug)	Zyvoxid	1	5.08699	0.71693	36.0946	0.17853	0.08889
Product (drug)	Mucosolvan	1	4.98355	0.70236	35.3604	0.18187	0.08889
Product (drug)	Somac	1	4.90948	0.69193	34.8347	0.18435	0.08889
Product (drug)	Halaven	1	4.85769	0.68463	34.4671	0.18612	0.08889
Product (drug)	Euglucon	1	4.84839	0.68332	34.4011	0.18644	0.08889
Product (drug)	Zelitrex	1	4.75136	0.66965	33.7124	0.18986	0.08889
Product (drug)	Prandin	1	4.7233	0.66569	33.5132	0.19087	0.08889
Product (drug)	Carboplatine	1	4.71304	0.66425	33.4404	0.19124	0.08889
Product (drug)	Eloxatine	1	4.64816	0.65511	32.98	0.19363	0.08889
Product (drug)	Calcium citrate	1	4.61569	0.65053	32.7495	0.19485	0.08889
Product (drug)	Probiotics	1	4.57125	0.64427	32.4341	0.19655	0.08889
Product (drug)	Prednison	1	4.52632	0.63794	32.1152	0.19829	0.08889
Product (drug)	Advair	1	0.25858	0.03645	1.83416	0.19834	0.08889
Product (drug)	Lamivudina	1	4.50485	0.63491	31.9628	0.19914	0.08889
Product (drug)	Primaxin	1	4.4717	0.63024	31.7276	0.20045	0.08889
Product (drug)	Immunoglobulin human normal	1	4.42611	0.62382	31.404	0.20229	0.08889
Product (drug)	Wellbutrin	1	0.24484	0.03452	1.73672	0.20445	0.08889
Product (drug)	Dexamethason	1	4.35382	0.61363	30.891	0.20528	0.08889
Product (drug)	Targocid	1	4.08903	0.57632	29.0117	0.21701	0.08889
Product (drug)	Speciafoldine	1	4.0498	0.5708	28.7333	0.21887	0.08889
Product (drug)	Lendormin D	1	4.02833	0.56777	28.5809	0.2199	0.08889
Product (drug)	Vitamin d2	1	4.01449	0.56582	28.4827	0.22056	0.08889
Product (drug)	Tardyferon	1	4.00075	0.56388	28.3852	0.22123	0.08889
Product (drug)	Abacavir	1	3.93241	0.55426	27.9002	0.22461	0.08889
Product (drug)	Zemplar	1	3.75924	0.52985	26.6713	0.23364	0.08889
Product (drug)	Aldactone a	1	3.68628	0.51957	26.1535	0.23766	0.08889
Product (drug)	Triamterene and hydrochlorothiazide	1	3.60923	0.50871	25.6067	0.24207	0.08889
Product (drug)	Ipratropium	1	3.53862	0.49877	25.1057	0.24624	0.08889
Product (drug)	Corgard	1	3.40615	0.4801	24.1656	0.25449	0.08889
Product (drug)	Tofranil	1	3.37288	0.47541	23.9296	0.25664	0.08889
Product (drug)	Fraxiparine	1	3.34467	0.47143	23.7294	0.2585	0.08889
Product (drug)	Valacyclovir	1	3.34099	0.47092	23.7033	0.25874	0.08889
Product (drug)	Renagel	1	3.33806	0.4705	23.6824	0.25894	0.08889
Product (drug)	Amlodin	1	3.25371	0.45862	23.0839	0.26467	0.08889
Product (drug)	Digitoxin	1	3.22471	0.45453	22.8781	0.2667	0.08889
Product (drug)	Exemestane	1	3.11625	0.43924	22.1085	0.27458	0.08889
Product (drug)	Tegretol	1	0.29782	0.04199	2.11249	0.27515	0.08889
Product (drug)	Effexor	1	0.2817	0.03971	1.9982	0.27902	0.08889
Product (drug)	Rohypnol	1	3.04506	0.42921	21.6033	0.28	0.08889
Product (drug)	Darvon	1	3.03715	0.4281	21.5471	0.28062	0.08889
Product (drug)	Klaricid	1	3.02445	0.42631	21.457	0.28161	0.08889
Product (drug)	Zyloprim	1	3.00293	0.42328	21.3044	0.28331	0.08889
Product (drug)	Enalapril	1	0.27239	0.0384	1.93211	0.28395	0.08889
Product (drug)	Bumex	1	2.96658	0.41815	21.0464	0.28623	0.08889
Product (drug)	Lenalidomide	1	2.94246	0.41475	20.8752	0.2882	0.08889
Product (drug)	Beloc zok	1	2.85296	0.40214	20.2401	0.29575	0.08889
Product (drug)	Palonosetron	1	2.83698	0.39989	20.1268	0.29714	0.08889
Product (drug)	Relafen	1	2.82013	0.39751	20.0072	0.29862	0.08889
Product (drug)	Aprepitant	1	2.80244	0.39502	19.8817	0.30019	0.08889
Product (drug)	Ropinirole	1	2.79266	0.39364	19.8123	0.30106	0.08889
Product (drug)	Bentyl	1	2.72504	0.38411	19.3325	0.30725	0.08889
Product (drug)	Faslodex	1	2.68318	0.37821	19.0355	0.3112	0.08889
Product (drug)	Dexametasona	1	2.64396	0.37269	18.7572	0.315	0.08889
Product (drug)	Lapatinib	1	2.61619	0.36877	18.5602	0.31775	0.08889
Product (drug)	Imipramine	1	2.6099	0.36789	18.5155	0.31837	0.08889
Product (drug)	Aredia	1	2.48607	0.35043	17.6369	0.33126	0.08889
Product (drug)	Urso	1	2.45236	0.34568	17.3977	0.33495	0.08889
Product (drug)	Ponstan	1	2.39515	0.33762	16.9918	0.3414	0.08889
Product (drug)	Zinc	1	2.38875	0.33672	16.9464	0.34214	0.08889
Product (drug)	Hydroxychloroquine sulfate	1	2.36055	0.33274	16.7462	0.34542	0.08889
Product (drug)	Rivaroxaban	1	2.29114	0.32296	16.2538	0.35377	0.08889
Product (drug)	Carisoprodol	1	2.24146	0.31596	15.9013	0.35999	0.08889
Product (drug)	Navelbine	1	2.18725	0.30832	15.5167	0.36703	0.08889
Product (drug)	Amlor	1	2.11657	0.29836	15.0152	0.37663	0.08889
Product (drug)	Buscopan	1	2.1101	0.29744	14.9693	0.37753	0.08889
Product (drug)	Stivarga	1	2.1028	0.29642	14.9175	0.37855	0.08889
Product (drug)	Spironolactone	1	0.34265	0.04831	2.43052	0.38225	0.08889
Product (drug)	Avastin	1	0.32741	0.04616	2.32243	0.38448	0.08889
Product (drug)	Gasmotin	1	2.04259	0.28793	14.4903	0.38721	0.08889
Product (drug)	Gaster	1	2.0276	0.28582	14.384	0.38942	0.08889
Product (drug)	Lexomil	1	2.02301	0.28517	14.3514	0.39011	0.08889
Product (drug)	Xopenex	1	2.01443	0.28396	14.2905	0.39139	0.08889
Product (drug)	Amikacin	1	2.00963	0.28328	14.2565	0.39211	0.08889
Product (drug)	Symbicort	1	0.30769	0.04338	2.18256	0.39251	0.08889
Product (drug)	Sudafed	1	1.99512	0.28124	14.1535	0.39431	0.08889
Product (drug)	Zyprexa	1	0.30405	0.04287	2.15675	0.39472	0.08889
Product (drug)	Tramal	1	1.98444	0.27973	14.0777	0.39594	0.08889
Product (drug)	Dulcolax	1	1.97875	0.27893	14.0374	0.39682	0.08889
Product (drug)	Ipratropium bromide	1	1.94881	0.27471	13.8249	0.40148	0.08889
Product (drug)	Qvar	1	1.94856	0.27468	13.8231	0.40152	0.08889
Product (drug)	Tykerb	1	1.88055	0.26509	13.3406	0.41253	0.08889
Product (drug)	Creon	1	1.8587	0.26201	13.1856	0.4162	0.08889
Product (drug)	Latanoprost	1	1.80697	0.25472	12.8186	0.42512	0.08889
Product (drug)	Thalidomide	1	1.78072	0.25102	12.6323	0.4298	0.08889
Product (drug)	Tylenol with codeine	1	1.75137	0.24688	12.4241	0.43514	0.08889
Product (drug)	Lomotil	1	1.71519	0.24178	12.1674	0.4419	0.08889
Product (drug)	Marcumar	1	1.65395	0.23315	11.733	0.45383	0.08889
Product (drug)	Magnesium sulfate	1	1.63122	0.22995	11.5717	0.45841	0.08889
Product (drug)	Granisetron	1	1.56972	0.22128	11.1353	0.47127	0.08889
Product (drug)	Amitriptyline hcl	1	1.55861	0.21971	11.0565	0.47367	0.08889
Product (drug)	Dexamethasone sodium phosphate	1	1.54561	0.21788	10.9643	0.4765	0.08889
Product (drug)	Mucinex	1	1.50474	0.21212	10.6744	0.48563	0.08889
Product (drug)	Hydromorphone	1	1.47767	0.2083	10.4823	0.49186	0.08889
Product (drug)	Aciphex	1	1.42715	0.20118	10.1239	0.50389	0.08889
Product (drug)	Ciclosporin	1	1.41981	0.20015	10.0719	0.50568	0.08889
Product (drug)	Dafalgan	1	1.40446	0.19798	9.96293	0.50948	0.08889
Product (drug)	Tamoxifen	1	1.36033	0.19176	9.64984	0.52069	0.08889
Product (drug)	Carvedilol	1	0.39582	0.0558	2.8077	0.52953	0.08889
Product (drug)	Januvia	1	0.37867	0.05338	2.68602	0.53204	0.08889
Product (drug)	Bisoprolol	1	0.37861	0.05338	2.68562	0.53205	0.08889
Product (drug)	Vitamin B12	1	0.37155	0.05238	2.63551	0.53377	0.08889
Product (drug)	Vitamin c	1	0.36888	0.052	2.61657	0.53454	0.08889
Product (drug)	Taxotere	1	0.36687	0.05172	2.60236	0.53515	0.08889
Product (drug)	Paclitaxel	1	0.36654	0.05167	2.59997	0.53526	0.08889
Product (drug)	Rocephin	1	1.28411	0.18102	9.10911	0.54116	0.08889
Product (drug)	Baclofen	1	0.35108	0.04949	2.49033	0.54136	0.08889
Product (drug)	Sodium bicarbonate	1	1.25515	0.17694	8.90368	0.54934	0.08889
Product (drug)	Eutirox	1	1.2503	0.17625	8.86924	0.55073	0.08889
Product (drug)	Mucosta	1	1.24958	0.17615	8.86414	0.55094	0.08889
Product (drug)	Primperan	1	1.24253	0.17516	8.81412	0.55297	0.08889
Product (drug)	Imbruvica	1	1.22569	0.17279	8.69466	0.55789	0.08889
Product (drug)	Proscar	1	1.21822	0.17173	8.64168	0.5601	0.08889
Product (drug)	Prinivil	1	1.20651	0.17008	8.55865	0.56359	0.08889
Product (drug)	Asacol	1	1.18488	0.16703	8.40513	0.57015	0.08889
Product (drug)	Prednisolon	1	1.15086	0.16224	8.16384	0.58075	0.08889
Product (drug)	Sulfamethoxazole;Trimethoprim	1	1.11768	0.15756	7.92843	0.59143	0.08889
Product (drug)	Enalapril maleate	1	1.1162	0.15735	7.91794	0.59192	0.08889
Product (drug)	Arimidex	1	1.09174	0.1539	7.74442	0.60003	0.08889
Product (drug)	Nystatin	1	1.08156	0.15247	7.6722	0.60347	0.08889
Product (drug)	Tricor	1	1.06183	0.14969	7.53226	0.61023	0.08889
Product (drug)	Mevacor	1	1.05286	0.14842	7.46858	0.61335	0.08889
Product (drug)	Atarax	1	1.04497	0.14731	7.41259	0.61611	0.08889
Product (drug)	Antihypertensives	1	1.03401	0.14577	7.3349	0.61999	0.08889
Product (drug)	Medrol	1	1.03212	0.1455	7.32145	0.62066	0.08889
Product (drug)	Seroxat	1	1.03163	0.14543	7.31797	0.62084	0.08889
Product (drug)	Cozaar	1	0.49932	0.07039	3.54187	0.72908	0.08889
Product (drug)	Carbamazepine	1	0.49533	0.06983	3.51358	0.7291	0.08889
Product (drug)	Pravastatin	1	0.48664	0.0686	3.45191	0.72928	0.08889
Product (drug)	Zometa	1	0.48186	0.06793	3.41798	0.72945	0.08889
Product (drug)	Diltiazem	1	0.46616	0.06572	3.30662	0.73044	0.08889
Product (drug)	Vitamins	1	0.45977	0.06482	3.26129	0.73104	0.08889
Product (drug)	Fluoxetine	1	0.45223	0.06375	3.20781	0.7319	0.08889
Product (drug)	Actos	1	0.44071	0.06213	3.12612	0.73355	0.08889
Product (drug)	Miralax	1	0.43678	0.06158	3.09826	0.73422	0.08889
Product (drug)	Keppra	1	0.42608	0.06007	3.02233	0.73631	0.08889
Product (drug)	Bextra	1	0.98687	0.13912	7.00046	1	0.08889
Product (drug)	Ultram	1	0.98419	0.13874	6.98141	1	0.08889
Product (drug)	Lortab	1	0.97447	0.13737	6.91246	1	0.08889
Product (drug)	Alendronate sodium	1	0.96549	0.13611	6.84877	1	0.08889
Product (drug)	Entresto	1	0.96353	0.13583	6.83487	1	0.08889
Product (drug)	Novorapid	1	0.96292	0.13574	6.83054	1	0.08889
Product (drug)	Bevacizumab	1	0.94696	0.13349	6.7173	1	0.08889
Product (drug)	Codeine	1	0.93518	0.13184	6.63378	1	0.08889
Product (drug)	Lunesta	1	0.92252	0.13005	6.54396	1	0.08889
Product (drug)	Benicar	1	0.91326	0.12875	6.47828	1	0.08889
Product (drug)	Isosorbide mononitrate	1	0.90927	0.12818	6.44997	1	0.08889
Product (drug)	Ceftazidime	1	0.90182	0.12713	6.39714	1	0.08889
Product (drug)	Methotrexate sodium	1	0.89598	0.12631	6.35565	1	0.08889
Product (drug)	Dyazide	1	0.89109	0.12562	6.32098	1	0.08889
Product (drug)	Phenergan	1	0.89078	0.12558	6.31876	1	0.08889
Product (drug)	Vitamin b complex	1	0.8888	0.1253	6.30471	1	0.08889
Product (drug)	Cotrimoxazole	1	0.84599	0.11926	6.00106	1	0.08889
Product (drug)	Gemzar	1	0.8394	0.11833	5.95432	1	0.08889
Product (drug)	Estradiol	1	0.83922	0.11831	5.953	1	0.08889
Product (drug)	Paroxetine	1	0.8015	0.11299	5.68545	1	0.08889
Product (drug)	Evista	1	0.77719	0.10956	5.513	1	0.08889
Product (drug)	Lovastatin	1	0.76738	0.10818	5.44339	1	0.08889
Product (drug)	Aricept	1	0.756	0.10658	5.36268	1	0.08889
Product (drug)	Capecitabine	1	0.75007	0.10574	5.32059	1	0.08889
Product (drug)	Naprosyn	1	0.74441	0.10494	5.28044	1	0.08889
Product (drug)	Actonel	1	0.7199	0.10149	5.10656	1	0.08889
Product (drug)	Fentanyl citrate	1	0.7126	0.10046	5.05483	1	0.08889
Product (drug)	Avelox	1	0.71177	0.10034	5.04891	1	0.08889
Product (drug)	Combivent	1	0.69874	0.09851	4.9565	1	0.08889
Product (drug)	Loratadine	1	0.69704	0.09827	4.94445	1	0.08889
Product (drug)	Zithromax	1	0.68693	0.09684	4.87269	1	0.08889
Product (drug)	Lopressor	1	0.6847	0.09653	4.85688	1	0.08889
Product (drug)	Herceptin	1	0.67602	0.0953	4.7953	1	0.08889
Product (drug)	Duragesic	1	0.66423	0.09364	4.71166	1	0.08889
Product (drug)	Calcium carbonate	1	0.6569	0.09261	4.65971	1	0.08889
Product (drug)	Cipro	1	0.65349	0.09213	4.63546	1	0.08889
Product (drug)	Zolpidem	1	0.64431	0.09083	4.5704	1	0.08889
Product (drug)	Aranesp	1	0.62399	0.08797	4.42625	1	0.08889
Product (drug)	Captopril	1	0.62261	0.08777	4.41645	1	0.08889
Product (drug)	Soliris	1	0.61883	0.08724	4.38965	1	0.08889
Product (drug)	Novolog	1	0.61863	0.08721	4.38822	1	0.08889
Product (drug)	Thalomid	1	0.59278	0.08357	4.20487	1	0.08889
Product (drug)	Flomax	1	0.58835	0.08294	4.17344	1	0.08889
Product (drug)	Asa	1	0.57469	0.08102	4.07652	1	0.08889
Product (drug)	Temazepam	1	0.5634	0.07943	3.99641	1	0.08889
Product (drug)	Nitroglycerin	1	0.56039	0.079	3.97504	1	0.08889
Product (drug)	Verapamil	1	0.55975	0.07891	3.9705	1	0.08889
Product (drug)	Azithromycin	1	0.54736	0.07717	3.88267	1	0.08889
Product (drug)	Zetia	1	0.54491	0.07682	3.86527	1	0.08889
Product (drug)	Taxol	1	0.54341	0.07661	3.85462	1	0.08889
Product (drug)	Tenormin	1	0.53514	0.07544	3.79598	1	0.08889
Product (drug)	Brilliant green ci 42040	1	N/A	N/A	N/A	N/A	0.08889
Product (drug)	Ibacitabine	1	N/A	N/A	N/A	N/A	0.08889
Product (drug)	Indium chloride (111in)	1	N/A	N/A	N/A	N/A	0.08889
Product (drug)	Restamin kowa	1	N/A	N/A	N/A	N/A	0.08889
Reaction	Thrombocytopenia	165	20.1138	17.4676	23.161	0	14.6667
Reaction	Neutropenia	157	24.1956	20.9249	27.9776	0	13.9556
Reaction	Platelet count decreased	117	35.2102	29.6539	41.8075	0	10.4
Reaction	Pancytopenia	90	37.1825	30.4903	45.3435	0	8
Reaction	Sepsis	71	19.9669	15.939	25.0127	0	6.31111
Reaction	White blood cell count decreased	71	18.4448	14.7241	23.1056	0	6.31111
Reaction	Myelodysplastic syndrome	69	170.119	135.17	214.104	0	6.13333
Reaction	Anaemia	59	6.11025	4.76609	7.8335	0	5.24444
Reaction	Disease progression	57	21.998	17.0784	28.3348	0	5.06667
Reaction	Pneumonia	53	5.20826	4.00438	6.77406	0	4.71111
Reaction	Pyrexia	51	1.36703	1.04547	1.78749	0.02978	4.53333
Reaction	Febrile neutropenia	50	26.1565	19.9434	34.3052	0	4.44444
Reaction	Leukopenia	48	9.10712	6.90447	12.0124	0	4.26667
Reaction	Neutrophil count decreased	42	24.0851	17.8967	32.4134	0	3.73333
Reaction	Meningitis tuberculous	37	3877.3	2715.3	5536.59	0	3.28889
Reaction	Nausea	37	0.6085	0.44324	0.83538	0.00118	3.28889
Reaction	Fatigue	34	1.16051	0.83345	1.61589	0.3496	3.02222
Reaction	Diarrhoea	34	1.04368	0.74955	1.45322	0.78927	3.02222
Reaction	Acute myeloid leukaemia	33	93.6552	66.8468	131.215	0	2.93333
Reaction	Bone marrow failure	32	15.123	10.7459	21.283	0	2.84444
Reaction	Non-Hodgkin's lymphoma	30	177.096	124.157	252.609	0	2.66667
Reaction	Pain	29	1.15859	0.80893	1.65941	0.41738	2.57778
Reaction	Progressive multifocal leukoencephalopathy	27	131.494	90.4379	191.188	0	2.4
Reaction	Malignant neoplasm progression	25	12.3283	8.36549	18.1683	0	2.22222
Reaction	Haemoglobin decreased	25	6.98472	4.73989	10.2927	0	2.22222
Reaction	Dyspnoea	24	0.73732	0.49632	1.09534	0.15347	2.13333
Reaction	Dehydration	23	4.63276	3.09133	6.94279	0	2.04444
Reaction	Vomiting	23	0.56584	0.37759	0.84794	0.00304	2.04444
Reaction	Asthenia	23	1.19364	0.79653	1.78874	0.358	2.04444
Reaction	Death	23	1.03563	0.69108	1.55195	0.82991	2.04444
Reaction	Hypotension	22	1.85509	1.22647	2.8059	0.00755	1.95556
Reaction	Multiple organ dysfunction syndrome	21	21.0275	13.7609	32.1311	0	1.86667
Reaction	Decreased appetite	21	1.80827	1.18371	2.76239	0.01097	1.86667
Reaction	Hypersensitivity	20	1.80971	1.17208	2.7942	0.01398	1.77778
Reaction	Lymphopenia	19	40.5139	25.9248	63.313	0	1.68889
Reaction	Lymphadenopathy	19	7.16578	4.58765	11.1927	0	1.68889
Reaction	Renal failure	18	4.50938	2.85144	7.1313	0	1.6
Reaction	Dizziness	17	0.42453	0.26486	0.68045	5e-05	1.51111
Reaction	Acute kidney injury	17	2.96532	1.84998	4.7531	0.0001	1.51111
Reaction	Ascites	16	18.5799	11.419	30.2314	0	1.42222
Reaction	Mucosal inflammation	16	15.277	9.38953	24.8559	0	1.42222
Reaction	Infection	16	3.31322	2.03677	5.38963	4e-05	1.42222
Reaction	Cytomegalovirus infection	15	41.3428	24.9911	68.3933	0	1.33333
Reaction	Abdominal pain	15	0.82358	0.49818	1.36152	0.55349	1.33333
Reaction	Lymphoma	14	33.1817	19.7048	55.876	0	1.24444
Reaction	Pleural effusion	14	7.03721	4.1809	11.8449	0	1.24444
Reaction	Respiratory failure	14	6.60851	3.92623	11.1232	0	1.24444
Reaction	Atrial fibrillation	14	4.32998	2.57262	7.2878	1e-05	1.24444
Reaction	Confusional state	14	1.60438	0.95327	2.7002	0.08548	1.24444
Reaction	Oedema peripheral	14	1.37237	0.81542	2.30971	0.2087	1.24444
Reaction	Chest pain	14	1.22646	0.72873	2.06415	0.45352	1.24444
Reaction	General physical health deterioration	13	5.62532	3.27632	9.65846	0	1.15556
Reaction	Cardiac failure congestive	13	3.13077	1.82352	5.37518	0.00038	1.15556
Reaction	Headache	12	0.29272	0.16674	0.51389	0	1.06667
Reaction	Urinary tract infection	12	2.52284	1.437	4.42916	0.00364	1.06667
Reaction	Condition aggravated	12	1.40921	0.8027	2.474	0.22477	1.06667
Reaction	Weight decreased	12	1.3285	0.75673	2.3323	0.31214	1.06667
Reaction	Haematocrit decreased	11	12.8681	7.14513	23.1748	0	0.97778
Reaction	Herpes zoster	11	4.52289	2.51179	8.14419	5e-05	0.97778
Reaction	Cough	11	0.73344	0.40734	1.32057	0.36205	0.97778
Reaction	Chills	11	0.85183	0.4731	1.53375	0.77825	0.97778
Reaction	Blood lactate dehydrogenase increased	10	14.6683	7.91168	27.1949	0	0.88889
Reaction	Deep vein thrombosis	10	2.85499	1.54028	5.29188	0.00328	0.88889
Reaction	Dysphagia	10	2.33731	1.261	4.33228	0.01234	0.88889
Reaction	Arthralgia	10	0.59867	0.323	1.10961	0.10803	0.88889
Reaction	Unevaluable event	10	1.58303	0.85407	2.93415	0.15566	0.88889
Reaction	Erythema	10	0.71928	0.38807	1.33316	0.34514	0.88889
Reaction	Stem cell transplant	9	152.287	79.1839	292.879	0	0.8
Reaction	Granulocytopenia	9	7.94709	4.14507	15.2365	0	0.8
Reaction	Staphylococcal infection	9	7.78247	4.05922	14.9208	0	0.8
Reaction	Device related infection	8	13.4008	6.71613	26.7389	0	0.71111
Reaction	Pruritus	8	0.17693	0.0887	0.35292	0	0.71111
Reaction	Rash	8	0.15119	0.0758	0.30158	0	0.71111
Reaction	Mental status changes	8	7.60931	3.81409	15.181	1e-05	0.71111
Reaction	Respiratory distress	8	6.97691	3.49716	13.9191	3e-05	0.71111
Reaction	Cellulitis	8	3.01754	1.51267	6.01953	0.0059	0.71111
Reaction	Off label use	8	0.77689	0.38947	1.54969	0.63634	0.71111
Reaction	Gait disturbance	8	1.11114	0.55703	2.21645	0.70619	0.71111
Reaction	Back pain	8	0.81479	0.40847	1.62529	0.74685	0.71111
Reaction	Cytopenia	7	48.2595	23.0326	101.117	0	0.62222
Reaction	Disease recurrence	7	15.4084	7.35979	32.2587	0	0.62222
Reaction	Septic shock	7	8.51388	4.06733	17.8215	2e-05	0.62222
Reaction	Rash macular	7	3.62139	1.73025	7.57951	0.00375	0.62222
Reaction	Sinusitis	7	2.18734	1.04512	4.57791	0.0444	0.62222
Reaction	Depression	7	0.6248	0.29854	1.3076	0.28935	0.62222
Reaction	Gastrointestinal haemorrhage	7	1.28756	0.61521	2.69468	0.51211	0.62222
Reaction	Oedema	7	1.10392	0.52747	2.31035	0.68966	0.62222
Reaction	Tachycardia	7	0.92612	0.44252	1.93822	1	0.62222
Reaction	Acute graft versus host disease in skin	6	212.515	95.1441	474.677	0	0.53333
Reaction	Venoocclusive liver disease	6	63.3558	28.4761	140.959	0	0.53333
Reaction	B-cell lymphoma	6	61.3107	27.5584	136.401	0	0.53333
Reaction	Pulmonary toxicity	6	55.8292	25.0982	124.188	0	0.53333
Reaction	Platelet disorder	6	53.8506	24.2099	119.781	0	0.53333
Reaction	Graft versus host disease	6	35.1597	15.8147	78.1678	0	0.53333
Reaction	Blood calcium decreased	6	18.307	8.23812	40.6825	0	0.53333
Reaction	Hypercalcaemia	6	12.2589	5.51733	27.2377	1e-05	0.53333
Reaction	Acute respiratory distress syndrome	6	12.1835	5.48343	27.0702	1e-05	0.53333
Reaction	Lung infiltration	6	10.908	4.90953	24.2354	2e-05	0.53333
Reaction	Pneumonitis	6	7.26736	3.27125	16.1451	0.00022	0.53333
Reaction	Hypophagia	6	7.01354	3.15702	15.5811	0.00026	0.53333
Reaction	Dyspnoea exertional	6	6.93459	3.12149	15.4057	0.00028	0.53333
Reaction	Toxic epidermal necrolysis	6	6.3768	2.87045	14.1663	0.00043	0.53333
Reaction	Malaise	6	0.31246	0.14067	0.69404	0.00076	0.53333
Reaction	Ataxia	6	4.39178	1.97702	9.75599	0.00282	0.53333
Reaction	Coma	6	2.59748	1.16935	5.76982	0.03037	0.53333
Reaction	Dermatitis	6	2.42787	1.09299	5.39304	0.03996	0.53333
Reaction	Pain in extremity	6	0.46008	0.20713	1.02192	0.04968	0.53333
Reaction	Hyponatraemia	6	1.93956	0.87317	4.3083	0.13851	0.53333
Reaction	Renal impairment	6	1.89399	0.85266	4.20706	0.1434	0.53333
Reaction	Heart rate increased	6	1.67166	0.75257	3.71319	0.18156	0.53333
Reaction	Chest discomfort	6	0.58543	0.26357	1.30036	0.21018	0.53333
Reaction	Fall	6	0.63903	0.2877	1.41942	0.3259	0.53333
Reaction	Pulmonary embolism	6	1.34597	0.60595	2.98971	0.46751	0.53333
Reaction	Cerebrovascular accident	6	0.95973	0.43208	2.13178	1	0.53333
Reaction	Non-Hodgkin's lymphoma recurrent	5	424.437	174.861	1030.23	0	0.44444
Reaction	Paraneoplastic syndrome	5	353.368	145.877	855.988	0	0.44444
Reaction	Cancer pain	5	126.413	52.5266	304.232	0	0.44444
Reaction	Perirectal abscess	5	107.765	44.802	259.213	0	0.44444
Reaction	Cytogenetic abnormality	5	67.0558	27.9104	161.104	0	0.44444
Reaction	Aspergillus infection	5	41.2455	17.1803	99.02	0	0.44444
Reaction	Haematotoxicity	5	39.8396	16.5954	95.6411	0	0.44444
Reaction	Chronic myeloid leukaemia	5	38.3514	15.9761	92.0644	0	0.44444
Reaction	Neutropenic sepsis	5	27.86	11.6092	66.859	0	0.44444
Reaction	Drug ineffective	5	0.12706	0.05299	0.30467	0	0.44444
Reaction	Colon cancer	5	13.5596	5.65258	32.5271	4e-05	0.44444
Reaction	Basal cell carcinoma	5	12.1229	5.05389	29.0796	7e-05	0.44444
Reaction	Mitral valve incompetence	5	9.52416	3.9708	22.8442	0.00021	0.44444
Reaction	Ecchymosis	5	6.908	2.88029	16.5679	0.00091	0.44444
Reaction	Lung neoplasm malignant	5	6.24994	2.60596	14.9894	0.0014	0.44444
Reaction	Skin lesion	5	6.19439	2.58281	14.8561	0.00146	0.44444
Reaction	Blood urea increased	5	4.90853	2.04673	11.7718	0.00393	0.44444
Reaction	Insomnia	5	0.35654	0.14869	0.85495	0.01009	0.44444
Reaction	White blood cell count increased	5	3.31476	1.38223	7.94918	0.0189	0.44444
Reaction	Depressed level of consciousness	5	3.14086	1.30972	7.53211	0.02315	0.44444
Reaction	Anxiety	5	0.41289	0.17219	0.99008	0.04099	0.44444
Reaction	Gastritis	5	2.37345	0.98974	5.69166	0.06262	0.44444
Reaction	Bone pain	5	2.1679	0.90403	5.19872	0.08431	0.44444
Reaction	Palpitations	5	0.45786	0.19094	1.0979	0.09084	0.44444
Reaction	Blood creatinine increased	5	2.09671	0.87434	5.02798	0.09376	0.44444
Reaction	Rash erythematous	5	0.49928	0.20821	1.19724	0.14896	0.44444
Reaction	Blood pressure decreased	5	1.90249	0.79336	4.56222	0.19834	0.44444
Reaction	Hypokalaemia	5	1.82736	0.76203	4.38203	0.20689	0.44444
Reaction	Stomatitis	5	1.75728	0.73281	4.21397	0.21713	0.44444
Reaction	Toxicity to various agents	5	1.35248	0.56401	3.24322	0.42816	0.44444
Reaction	Neuropathy peripheral	5	1.26468	0.52739	3.03267	0.60654	0.44444
Reaction	Alanine aminotransferase increased	5	1.24914	0.52092	2.99542	0.60887	0.44444
Reaction	Haemorrhage	5	1.20728	0.50346	2.89503	0.61639	0.44444
Reaction	Abdominal distension	5	1.11069	0.46318	2.66339	0.80991	0.44444
Reaction	Graft versus host disease in gastrointestinal tract	4	175.157	65.4825	468.52	0	0.35556
Reaction	Human herpesvirus 6 infection	4	156.245	58.4479	417.681	0	0.35556
Reaction	Mantle cell lymphoma	4	147.166	55.0675	393.294	0	0.35556
Reaction	Bacterial sepsis	4	47.5954	17.8668	126.79	0	0.35556
Reaction	Urticaria	4	0.12459	0.04684	0.33139	0	0.35556
Reaction	Squamous cell carcinoma of skin	4	28.2695	10.6187	75.2602	1e-05	0.35556
Reaction	Blood pressure diastolic decreased	4	27.2798	10.2472	72.6231	2e-05	0.35556
Reaction	Lung neoplasm	4	25.3459	9.52139	67.4705	2e-05	0.35556
Reaction	Erysipelas	4	25.043	9.40771	66.6636	2e-05	0.35556
Reaction	Tumour lysis syndrome	4	24.647	9.25905	65.6085	3e-05	0.35556
Reaction	Obstructive airways disorder	4	18.8113	7.06812	50.065	7e-05	0.35556
Reaction	Blood albumin decreased	4	15.6446	5.87888	41.6328	0.00014	0.35556
Reaction	Large intestine polyp	4	14.5127	5.45374	38.6193	0.00019	0.35556
Reaction	Extravasation	4	14.0889	5.29453	37.4908	0.00022	0.35556
Reaction	Cachexia	4	10.971	4.12327	29.1912	0.00055	0.35556
Reaction	Intestinal perforation	4	10.2374	3.84764	27.2386	0.00071	0.35556
Reaction	Neoplasm	4	8.52804	3.20537	22.6893	0.00139	0.35556
Reaction	Blood sodium decreased	4	7.12036	2.6764	18.9432	0.00265	0.35556
Reaction	Pneumonia aspiration	4	6.46177	2.4289	17.1907	0.00374	0.35556
Reaction	Bacterial infection	4	5.95993	2.2403	15.8554	0.00496	0.35556
Reaction	Gastroenteritis	4	5.64078	2.12036	15.0061	0.006	0.35556
Reaction	Red blood cell count decreased	4	5.42867	2.04064	14.4418	0.00684	0.35556
Reaction	Candida infection	4	5.14818	1.93522	13.6955	0.0082	0.35556
Reaction	Petechiae	4	4.90314	1.84312	13.0435	0.00967	0.35556
Reaction	Fungal infection	4	3.70155	1.39149	9.8466	0.02428	0.35556
Reaction	Skin ulcer	4	3.61223	1.35792	9.60898	0.02623	0.35556
Reaction	Leukocytosis	4	3.38076	1.27091	8.99318	0.03226	0.35556
Reaction	Hepatic failure	4	3.28697	1.23566	8.74366	0.03518	0.35556
Reaction	Colitis	4	3.27652	1.23173	8.71585	0.03553	0.35556
Reaction	Blood bilirubin increased	4	3.20702	1.2056	8.53095	0.03794	0.35556
Reaction	Injection site erythema	4	0.38363	0.14423	1.02039	0.04177	0.35556
Reaction	Hyperhidrosis	4	0.37479	0.14091	0.99688	0.04291	0.35556
Reaction	Osteoarthritis	4	2.82655	1.06259	7.51879	0.05535	0.35556
Reaction	Neoplasm malignant	4	2.82511	1.06205	7.51495	0.05543	0.35556
Reaction	Constipation	4	0.39441	0.14828	1.04907	0.05582	0.35556
Reaction	Cardio-respiratory arrest	4	2.74759	1.03291	7.30872	0.06011	0.35556
Reaction	Hypotonia	4	2.72871	1.02581	7.25851	0.06133	0.35556
Reaction	Blood alkaline phosphatase increased	4	2.527	0.94999	6.72189	0.07635	0.35556
Reaction	Urinary incontinence	4	2.47141	0.92909	6.57401	0.08126	0.35556
Reaction	Breast cancer	4	2.1227	0.79801	5.64638	0.1225	0.35556
Reaction	Hypoaesthesia	4	0.48711	0.18313	1.29565	0.16112	0.35556
Reaction	Blood glucose increased	4	0.54605	0.20529	1.45241	0.26696	0.35556
Reaction	Hyperglycaemia	4	1.58569	0.59613	4.21785	0.32717	0.35556
Reaction	Syncope	4	0.56803	0.21356	1.51089	0.34148	0.35556
Reaction	Jaundice	4	1.51144	0.56822	4.02033	0.34474	0.35556
Reaction	Bronchitis	4	1.4118	0.53076	3.75529	0.37404	0.35556
Reaction	Abdominal discomfort	4	0.60851	0.22878	1.61856	0.43146	0.35556
Reaction	Cardiac disorder	4	1.28533	0.48322	3.41888	0.56051	0.35556
Reaction	Aspartate aminotransferase increased	4	1.21768	0.45779	3.23893	0.57645	0.35556
Reaction	Vision blurred	4	0.6839	0.25712	1.81908	0.67448	0.35556
Reaction	Cardiac arrest	4	1.09341	0.41107	2.90837	0.78942	0.35556
Reaction	Dysgeusia	4	0.7933	0.29825	2.11008	0.82417	0.35556
Reaction	Blood pressure increased	4	0.73197	0.27519	1.94696	0.82769	0.35556
Reaction	Epistaxis	4	0.95119	0.35761	2.53008	1	0.35556
Reaction	Acute graft versus host disease in intestine	3	191.532	61.4263	597.21	0	0.26667
Reaction	Pulmonary sepsis	3	146.104	46.9362	454.797	0	0.26667
Reaction	Alpha haemolytic streptococcal infection	3	130.99	42.1043	407.521	0	0.26667
Reaction	Radiation injury	3	111.182	35.7636	345.641	0	0.26667
Reaction	Encephalitis viral	3	98.4547	31.6847	305.931	0	0.26667
Reaction	Venoocclusive disease	3	73.5234	23.6833	228.249	1e-05	0.26667
Reaction	Quadriparesis	3	70.8935	22.8384	220.063	1e-05	0.26667
Reaction	Chronic graft versus host disease	3	70.3465	22.6626	218.361	1e-05	0.26667
Reaction	Acute graft versus host disease	3	52.0966	16.7947	161.602	3e-05	0.26667
Reaction	Neutrophil count abnormal	3	50.4254	16.2569	156.408	3e-05	0.26667
Reaction	Bone marrow disorder	3	45.6302	14.7136	141.509	5e-05	0.26667
Reaction	Neoplasm recurrence	3	39.6043	12.7734	122.794	7e-05	0.26667
Reaction	Adenocarcinoma	3	38.7953	12.5129	120.282	7e-05	0.26667
Reaction	Blood bicarbonate decreased	3	35.8369	11.5599	111.098	9e-05	0.26667
Reaction	Blood chloride decreased	3	30.5526	9.85733	94.6974	0.00015	0.26667
Reaction	Oesophageal carcinoma	3	28.9426	9.33843	89.7016	0.00017	0.26667
Reaction	Diffuse large B-cell lymphoma	3	27.444	8.85542	85.0524	0.0002	0.26667
Reaction	Pulmonary alveolar haemorrhage	3	26.4411	8.53213	81.9413	0.00022	0.26667
Reaction	Urinary tract obstruction	3	25.3388	8.17676	78.522	0.00025	0.26667
Reaction	Bronchopulmonary aspergillosis	3	25.1293	8.10921	77.8721	0.00026	0.26667
Reaction	Computerised tomogram abnormal	3	20.7674	6.70274	64.3449	0.00045	0.26667
Reaction	Skin swelling	3	18.8444	6.0825	58.3823	0.0006	0.26667
Reaction	Blood culture positive	3	18.8133	6.07246	58.2859	0.0006	0.26667
Reaction	Arthritis bacterial	3	18.6898	6.03265	57.9032	0.00061	0.26667
Reaction	Hepatitis B	3	17.1823	5.54635	53.2296	0.00078	0.26667
Reaction	Myalgia	3	0.21884	0.07069	0.67752	0.00099	0.26667
Reaction	Hypophosphataemia	3	14.091	4.54905	43.6482	0.00137	0.26667
Reaction	Hypovolaemia	3	12.2047	3.94035	37.8024	0.00206	0.26667
Reaction	Pneumocystis jirovecii pneumonia	3	11.3423	3.66202	35.13	0.00253	0.26667
Reaction	Hypoventilation	3	10.0851	3.25627	31.2347	0.00351	0.26667
Reaction	Spinal osteoarthritis	3	9.7716	3.1551	30.2635	0.00383	0.26667
Reaction	Anuria	3	8.75783	2.82788	27.1227	0.00519	0.26667
Reaction	Splenomegaly	3	8.41975	2.71874	26.0754	0.00578	0.26667
Reaction	Aplastic anaemia	3	8.3626	2.70029	25.8983	0.00589	0.26667
Reaction	Metastases to liver	3	7.75115	2.50291	24.0042	0.00724	0.26667
Reaction	Platelet count increased	3	7.4913	2.41903	23.1992	0.00794	0.26667
Reaction	Disseminated intravascular coagulation	3	7.29236	2.35481	22.583	0.00854	0.26667
Reaction	Pancreatic carcinoma	3	7.22532	2.33316	22.3753	0.00876	0.26667
Reaction	Hepatomegaly	3	6.93723	2.24016	21.4829	0.00977	0.26667
Reaction	Mass	3	6.76228	2.18368	20.941	0.01046	0.26667
Reaction	Lymphocyte count decreased	3	6.476	2.09125	20.0542	0.01174	0.26667
Reaction	Prothrombin time prolonged	3	6.27886	2.02761	19.4436	0.01275	0.26667
Reaction	Sinus tachycardia	3	5.33902	1.72417	16.5327	0.0195	0.26667
Reaction	Hypocalcaemia	3	4.64816	1.50111	14.393	0.02781	0.26667
Reaction	Hypertension	3	0.3124	0.10091	0.9672	0.03245	0.26667
Reaction	Cardiomyopathy	3	4.17594	1.34863	12.9305	0.03638	0.26667
Reaction	Subdural haematoma	3	3.75521	1.21277	11.6276	0.04722	0.26667
Reaction	Osteonecrosis	3	3.11817	1.00706	9.65484	0.0734	0.26667
Reaction	Injection site reaction	3	0.35941	0.11609	1.11274	0.07797	0.26667
Reaction	Abdominal pain upper	3	0.35843	0.11577	1.10969	0.07828	0.26667
Reaction	Night sweats	3	2.57264	0.83089	7.96553	0.11318	0.26667
Reaction	Therapy non-responder	3	2.48919	0.80394	7.70714	0.12157	0.26667
Reaction	Orthostatic hypotension	3	2.45739	0.79367	7.60866	0.12498	0.26667
Reaction	Lung disorder	3	2.44749	0.79047	7.57802	0.12607	0.26667
Reaction	Hypoxia	3	2.38825	0.77134	7.39457	0.13284	0.26667
Reaction	Respiratory arrest	3	2.3157	0.74791	7.16992	0.14178	0.26667
Reaction	Product use in unapproved indication	3	2.23027	0.72032	6.9054	0.15333	0.26667
Reaction	Interstitial lung disease	3	1.92657	0.62224	5.965	0.20558	0.26667
Reaction	Skin reaction	3	1.84321	0.59532	5.7069	0.22375	0.26667
Reaction	Chronic obstructive pulmonary disease	3	1.80098	0.58168	5.57612	0.23372	0.26667
Reaction	Body temperature increased	3	1.79417	0.57948	5.55505	0.23538	0.26667
Reaction	Pulmonary oedema	3	1.71622	0.55431	5.31368	0.25547	0.26667
Reaction	Dermatitis bullous	3	1.71242	0.55308	5.3019	0.25651	0.26667
Reaction	Agitation	3	0.51241	0.16551	1.58643	0.3015	0.26667
Reaction	Upper respiratory tract infection	3	1.58903	0.51323	4.91986	0.44414	0.26667
Reaction	Agranulocytosis	3	1.56632	0.50589	4.84953	0.44745	0.26667
Reaction	Throat irritation	3	1.53509	0.49581	4.75285	0.45237	0.26667
Reaction	Skin exfoliation	3	1.39185	0.44955	4.30933	0.48096	0.26667
Reaction	Rectal haemorrhage	3	1.30735	0.42225	4.04768	0.5032	0.26667
Reaction	Swelling	3	0.57958	0.1872	1.79439	0.50421	0.26667
Reaction	Stevens-Johnson syndrome	3	1.16907	0.3776	3.61956	0.74684	0.26667
Reaction	Drug hypersensitivity	3	0.67885	0.21926	2.10173	0.80827	0.26667
Reaction	Diabetes mellitus	3	0.98139	0.31698	3.03845	1	0.26667
Reaction	Contusion	3	0.91018	0.29398	2.81797	1	0.26667
Reaction	Bradycardia	3	0.81007	0.26165	2.50803	1	0.26667
Reaction	Product use issue	3	0.7681	0.24809	2.37808	1	0.26667
Reaction	Mantle cell lymphoma recurrent	2	533.152	130.319	2181.2	1e-05	0.17778
Reaction	Purpura senile	2	446.907	109.662	1821.29	1e-05	0.17778
Reaction	Thrombophlebitis septic	2	428.024	105.118	1742.85	1e-05	0.17778
Reaction	Bronchopulmonary aspergillosis allergic	2	379.871	93.4945	1543.43	1e-05	0.17778
Reaction	5q minus syndrome	2	313.296	77.3409	1269.11	2e-05	0.17778
Reaction	Engraftment syndrome	2	310.099	76.5628	1255.98	2e-05	0.17778
Reaction	Parakeratosis	2	289.426	71.5254	1171.15	2e-05	0.17778
Reaction	Acute myelomonocytic leukaemia	2	286.695	70.8594	1159.96	2e-05	0.17778
Reaction	B-cell lymphoma recurrent	2	211.039	52.3394	850.94	5e-05	0.17778
Reaction	Haemosiderosis	2	208.149	51.6292	839.173	5e-05	0.17778
Reaction	Refractory anaemia with an excess of blasts	2	186.44	46.2901	750.913	6e-05	0.17778
Reaction	Acute hepatitis B	2	160.792	39.9686	646.859	8e-05	0.17778
Reaction	Burkitt's lymphoma	2	147.523	36.6923	593.12	9e-05	0.17778
Reaction	Metastases to skin	2	109.71	27.3344	440.335	0.00017	0.17778
Reaction	Septic embolus	2	94.3779	23.5308	378.534	0.00022	0.17778
Reaction	Lung infection pseudomonal	2	91.2603	22.7567	365.978	0.00024	0.17778
Reaction	Intravascular haemolysis	2	90.9871	22.6889	364.877	0.00024	0.17778
Reaction	Cytomegalovirus chorioretinitis	2	64.6589	16.1429	258.985	0.00047	0.17778
Reaction	Pseudomonal sepsis	2	58.8947	14.7077	235.835	0.00057	0.17778
Reaction	Streptococcal sepsis	2	57.7751	14.4288	231.34	0.00059	0.17778
Reaction	Pneumonia klebsiella	2	56.0695	14.0039	224.493	0.00062	0.17778
Reaction	Dyspnoea paroxysmal nocturnal	2	55.3546	13.8258	221.624	0.00064	0.17778
Reaction	Radiation skin injury	2	54.4618	13.6034	218.04	0.00066	0.17778
Reaction	Extremity necrosis	2	53.9781	13.4829	216.099	0.00067	0.17778
Reaction	Arachnoiditis	2	52.0371	12.9992	208.31	0.00072	0.17778
Reaction	Lymphadenopathy mediastinal	2	51.2474	12.8024	205.141	0.00075	0.17778
Reaction	Mucormycosis	2	44.7565	11.1842	179.106	0.00097	0.17778
Reaction	Head titubation	2	39.9864	9.99434	159.982	0.00121	0.17778
Reaction	Tonsillar hypertrophy	2	39.5699	9.89042	158.312	0.00124	0.17778
Reaction	Biliary tract disorder	2	37.288	9.32103	149.167	0.00139	0.17778
Reaction	Cytomegalovirus viraemia	2	36.7469	9.186	146.999	0.00143	0.17778
Reaction	Tremor	2	0.17448	0.04369	0.6968	0.00154	0.17778
Reaction	Paraesthesia	2	0.17436	0.04366	0.69634	0.00155	0.17778
Reaction	Post transplant lymphoproliferative disorder	2	34.031	8.50814	136.118	0.00166	0.17778
Reaction	Gastrointestinal toxicity	2	33.5057	8.37701	134.014	0.00172	0.17778
Reaction	Auricular swelling	2	32.0228	8.00681	128.074	0.00188	0.17778
Reaction	Injection site ulcer	2	30.4201	7.60662	121.655	0.00207	0.17778
Reaction	Antibody test positive	2	28.8875	7.2239	115.518	0.00229	0.17778
Reaction	Onycholysis	2	28.217	7.05643	112.833	0.0024	0.17778
Reaction	Pneumonia viral	2	27.8549	6.966	111.383	0.00246	0.17778
Reaction	Hypercapnia	2	27.2065	6.80405	108.787	0.00258	0.17778
Reaction	Rhonchi	2	27.1336	6.78585	108.496	0.00259	0.17778
Reaction	Ventricular dysfunction	2	23.2871	5.8249	93.0986	0.00349	0.17778
Reaction	Cervix carcinoma	2	23.0925	5.77626	92.3196	0.00355	0.17778
Reaction	Lacunar infarction	2	20.6873	5.17521	82.6953	0.00439	0.17778
Reaction	Chemical burn	2	20.0064	5.00502	79.9707	0.00468	0.17778
Reaction	Protein total decreased	2	18.5416	4.63889	74.1107	0.00542	0.17778
Reaction	Cerebellar syndrome	2	18.1865	4.55012	72.6903	0.00563	0.17778
Reaction	Lichen planus	2	17.9184	4.48311	71.6179	0.00579	0.17778
Reaction	Atypical pneumonia	2	17.7199	4.43348	70.8238	0.00592	0.17778
Reaction	Embolic stroke	2	17.0441	4.26453	68.1207	0.00637	0.17778
Reaction	Metastatic neoplasm	2	16.0283	4.01055	64.0577	0.00717	0.17778
Reaction	Flushing	2	0.20872	0.05226	0.83354	0.00829	0.17778
Reaction	Rales	2	13.5972	3.40262	54.3356	0.00982	0.17778
Reaction	Pneumonia bacterial	2	13.364	3.3443	53.4031	0.01015	0.17778
Reaction	Hypoalbuminaemia	2	12.71	3.18074	50.7884	0.01116	0.17778
Reaction	Metabolic disorder	2	12.3485	3.09032	49.343	0.01179	0.17778
Reaction	Oesophageal disorder	2	12.1316	3.03607	48.4758	0.01219	0.17778
Reaction	Pseudomonas infection	2	11.6436	2.91399	46.5246	0.01317	0.17778
Reaction	Intervertebral disc disorder	2	11.5859	2.89956	46.2939	0.0133	0.17778
Reaction	Performance status decreased	2	11.5069	2.87981	45.9782	0.01347	0.17778
Reaction	Abdominal tenderness	2	10.0695	2.52024	40.2321	0.0173	0.17778
Reaction	Retroperitoneal haemorrhage	2	9.74341	2.43866	38.9287	0.0184	0.17778
Reaction	Refusal of treatment by patient	2	9.66901	2.42005	38.6313	0.01866	0.17778
Reaction	Hydronephrosis	2	9.65365	2.41621	38.5699	0.01872	0.17778
Reaction	Lymphoedema	2	9.62613	2.40932	38.4599	0.01882	0.17778
Reaction	Failure to thrive	2	9.12877	2.28489	36.472	0.02077	0.17778
Reaction	Feeling abnormal	2	0.24288	0.06082	0.96997	0.02154	0.17778
Reaction	Dyspepsia	2	0.24174	0.06053	0.96543	0.02163	0.17778
Reaction	Hyperkeratosis	2	8.88847	2.22477	35.5115	0.02182	0.17778
Reaction	Urosepsis	2	8.09313	2.02577	32.3328	0.02594	0.17778
Reaction	Malnutrition	2	7.73274	1.93559	30.8925	0.0282	0.17778
Reaction	Pleurisy	2	7.73078	1.9351	30.8846	0.02822	0.17778
Reaction	Squamous cell carcinoma	2	7.63752	1.91177	30.5119	0.02885	0.17778
Reaction	Product quality issue	2	0.25744	0.06446	1.02813	0.02957	0.17778
Reaction	Tricuspid valve incompetence	2	7.32282	1.83302	29.2543	0.03115	0.17778
Reaction	Injection site necrosis	2	7.05424	1.76581	28.181	0.03334	0.17778
Reaction	Atrial flutter	2	7.01516	1.75603	28.0248	0.03368	0.17778
Reaction	Retinal haemorrhage	2	6.72041	1.68227	26.8469	0.0364	0.17778
Reaction	Inappropriate antidiuretic hormone secretion	2	6.42217	1.60764	25.6552	0.03951	0.17778
Reaction	Decreased activity	2	6.37635	1.59617	25.4721	0.04002	0.17778
Reaction	Pulmonary haemorrhage	2	6.31408	1.58059	25.2233	0.04073	0.17778
Reaction	Skin necrosis	2	6.16799	1.54403	24.6395	0.04247	0.17778
Reaction	Incontinence	2	5.81732	1.45627	23.2383	0.04715	0.17778
Reaction	Renal tubular necrosis	2	5.69949	1.42678	22.7675	0.04889	0.17778
Reaction	Respiratory rate increased	2	5.64759	1.41379	22.5601	0.04969	0.17778
Reaction	Facial pain	2	5.5557	1.39079	22.193	0.05115	0.17778
Reaction	Nystagmus	2	5.3334	1.33516	21.3047	0.05497	0.17778
Reaction	Skin cancer	2	5.22878	1.30897	20.8867	0.05692	0.17778
Reaction	Atelectasis	2	5.16217	1.2923	20.6206	0.05821	0.17778
Reaction	Polyneuropathy	2	5.09467	1.27541	20.3509	0.05956	0.17778
Reaction	Arteriosclerosis	2	5.06495	1.26797	20.2321	0.06018	0.17778
Reaction	Cardiac murmur	2	5.02891	1.25895	20.0881	0.06093	0.17778
Reaction	Gingival hypertrophy	2	4.96077	1.24189	19.8159	0.0624	0.17778
Reaction	Dialysis	2	4.85458	1.21532	19.3916	0.06479	0.17778
Reaction	Ejection fraction decreased	2	4.75508	1.19041	18.9941	0.06715	0.17778
Reaction	Oral candidiasis	2	4.59684	1.15081	18.3619	0.07119	0.17778
Reaction	Thrombophlebitis	2	4.25805	1.06601	17.0083	0.08115	0.17778
Reaction	Dry throat	2	4.08409	1.02246	16.3133	0.08709	0.17778
Reaction	Ileus	2	4.06171	1.01686	16.2239	0.0879	0.17778
Reaction	Prostate cancer	2	3.96525	0.99272	15.8385	0.09153	0.17778
Reaction	Wound	2	3.93955	0.98628	15.7359	0.09253	0.17778
Reaction	Cholestasis	2	3.71739	0.93068	14.8483	0.10193	0.17778
Reaction	Dry mouth	2	0.31629	0.0792	1.26315	0.10548	0.17778
Reaction	Cardiomegaly	2	3.57148	0.89415	14.2654	0.1089	0.17778
Reaction	Hepatotoxicity	2	3.44359	0.86214	13.7545	0.11561	0.17778
Reaction	Myoclonus	2	3.4327	0.85941	13.711	0.11621	0.17778
Reaction	Sleep apnoea syndrome	2	3.39512	0.85	13.5609	0.11831	0.17778
Reaction	Lung infection	2	3.22848	0.80829	12.8952	0.12835	0.17778
Reaction	Eating disorder	2	3.19723	0.80047	12.7704	0.13037	0.17778
Reaction	Clostridium difficile colitis	2	3.16988	0.79362	12.6611	0.13218	0.17778
Reaction	Myopathy	2	3.09562	0.77503	12.3644	0.13729	0.17778
Reaction	Pulmonary fibrosis	2	2.8915	0.72394	11.5491	0.15291	0.17778
Reaction	Pericardial effusion	2	2.86587	0.71752	11.4467	0.15506	0.17778
Reaction	Oesophagitis	2	2.83618	0.71009	11.3281	0.1576	0.17778
Reaction	Gout	2	2.80762	0.70294	11.214	0.1601	0.17778
Reaction	Haemolytic anaemia	2	2.7351	0.68478	10.9243	0.16673	0.17778
Reaction	Bladder cancer	2	2.50162	0.62633	9.99165	0.19102	0.17778
Reaction	Vasculitis	2	2.29564	0.57477	9.16886	0.21701	0.17778
Reaction	Paralysis	2	2.1176	0.5302	8.4577	0.24384	0.17778
Reaction	Influenza like illness	2	0.39505	0.09892	1.57771	0.25842	0.17778
Reaction	No adverse event	2	0.39251	0.09828	1.56758	0.25932	0.17778
Reaction	Anaphylactic reaction	2	0.39154	0.09804	1.5637	0.25969	0.17778
Reaction	Blood potassium decreased	2	1.97669	0.49492	7.89486	0.2686	0.17778
Reaction	Mental impairment	2	1.95495	0.48948	7.80801	0.27275	0.17778
Reaction	Encephalopathy	2	1.84998	0.4632	7.38875	0.29408	0.17778
Reaction	Generalised oedema	2	1.83335	0.45903	7.32232	0.29768	0.17778
Reaction	Liver disorder	2	1.78218	0.44622	7.11791	0.30914	0.17778
Reaction	Dermatitis exfoliative	2	1.68215	0.42118	6.71837	0.33344	0.17778
Reaction	Complication associated with device	2	1.64003	0.41063	6.55012	0.34447	0.17778
Reaction	Blindness	2	1.63667	0.40979	6.53672	0.34537	0.17778
Reaction	Cholelithiasis	2	1.53035	0.38317	6.11205	0.3757	0.17778
Reaction	Eye disorder	2	1.50601	0.37708	6.01482	0.38316	0.17778
Reaction	Inflammation	2	1.50317	0.37637	6.00351	0.38404	0.17778
Reaction	Cognitive disorder	2	1.44	0.36055	5.75117	0.40443	0.17778
Reaction	Transient ischaemic attack	2	1.4328	0.35875	5.72243	0.40684	0.17778
Reaction	Gamma-glutamyltransferase increased	2	1.43071	0.35823	5.71407	0.40755	0.17778
Reaction	Feeling hot	2	0.50904	0.12746	2.03296	0.45175	0.17778
Reaction	Medication error	2	0.53316	0.1335	2.12929	0.59898	0.17778
Reaction	Emotional disorder	2	1.36436	0.34161	5.44906	0.66145	0.17778
Reaction	Azotaemia	2	1.36167	0.34094	5.43831	0.66176	0.17778
Reaction	Hypoacusis	2	1.35608	0.33954	5.41598	0.66242	0.17778
Reaction	Throat tightness	2	1.24968	0.3129	4.99102	0.67692	0.17778
Reaction	Infusion related reaction	2	1.2304	0.30807	4.91403	0.67999	0.17778
Reaction	Fluid retention	2	1.2246	0.30662	4.89086	0.68094	0.17778
Reaction	Circulatory collapse	2	1.19171	0.29839	4.75947	0.6866	0.17778
Reaction	Wheezing	2	1.11171	0.27836	4.43996	0.70229	0.17778
Reaction	Disorientation	2	1.09481	0.27413	4.37246	0.70598	0.17778
Reaction	Discomfort	2	1.06065	0.26557	4.23602	0.71386	0.17778
Reaction	Blood glucose decreased	2	1.02391	0.25638	4.0893	0.723	0.17778
Reaction	Joint swelling	2	0.64702	0.16201	2.58401	0.77596	0.17778
Reaction	Hepatitis	2	0.64531	0.16158	2.5772	0.77601	0.17778
Reaction	Burning sensation	2	0.60041	0.15034	2.39787	0.77945	0.17778
Reaction	Liver function test abnormal	2	0.99913	0.25017	3.99034	1	0.17778
Reaction	Neck pain	2	0.89046	0.22296	3.55631	1	0.17778
Reaction	Skin discolouration	2	0.85338	0.21368	3.4082	1	0.17778
Reaction	Hospitalisation	2	0.80951	0.20269	3.23298	1	0.17778
Reaction	Arrhythmia	2	0.80498	0.20156	3.21491	1	0.17778
Reaction	Speech disorder	2	0.79832	0.19989	3.1883	1	0.17778
Reaction	Gastrointestinal disorder	2	0.69476	0.17396	2.77471	1	0.17778
Reaction	Influenza	2	0.68532	0.1716	2.73698	1	0.17778
Reaction	Periorbital oedema	2	0.68515	0.17156	2.7363	1	0.17778
Reaction	Asthma	2	0.67599	0.16926	2.69972	1	0.17778
Reaction	Splenic candidiasis	1	7597.42	689.368	83730	0.0002	0.08889
Reaction	Thymoma malignant recurrent	1	5064.95	527.232	48657.3	0.00026	0.08889
Reaction	Rash maculo-papular	1	0.08887	0.01253	0.63039	0.00026	0.08889
Reaction	Peripheral blood stem cell apheresis	1	3038.97	355.312	25992.2	0.00039	0.08889
Reaction	Directional Doppler flow tests abnormal	1	2170.69	267.278	17629.2	0.00053	0.08889
Reaction	Human anti-mouse antibody positive	1	1899.36	237.745	15174.1	0.00059	0.08889
Reaction	Lung infiltration malignant	1	1688.32	214.068	13315.5	0.00066	0.08889
Reaction	Burkitt's lymphoma recurrent	1	1519.48	194.667	11860.4	0.00072	0.08889
Reaction	Seizure	1	0.09614	0.01355	0.68194	0.0008	0.08889
Reaction	Burkitt's lymphoma stage IV	1	1168.83	153.027	8927.67	0.00092	0.08889
Reaction	Haemorrhagic tumour necrosis	1	1168.83	153.027	8927.67	0.00092	0.08889
Reaction	Iodine uptake increased	1	1168.83	153.027	8927.67	0.00092	0.08889
Reaction	Bacteroides bacteraemia	1	1085.35	142.837	8247	0.00099	0.08889
Reaction	Superinfection viral	1	1085.35	142.837	8247	0.00099	0.08889
Reaction	Oncocytoma	1	893.814	119.047	6710.81	0.00118	0.08889
Reaction	Acute megakaryocytic leukaemia	1	660.645	89.2923	4887.91	0.00158	0.08889
Reaction	Bone marrow leukaemic cell infiltration	1	660.645	89.2923	4887.91	0.00158	0.08889
Reaction	Radiation fibrosis - lung	1	633.118	85.7207	4676.1	0.00164	0.08889
Reaction	Renal oncocytoma	1	633.118	85.7207	4676.1	0.00164	0.08889
Reaction	Chronic graft versus host disease in liver	1	542.673	73.8969	3985.2	0.00191	0.08889
Reaction	Fibrosarcoma	1	542.673	73.8969	3985.2	0.00191	0.08889
Reaction	CSF virus identified	1	523.96	71.4334	3843.22	0.00197	0.08889
Reaction	Refractory anaemia with ringed sideroblasts	1	523.96	71.4334	3843.22	0.00197	0.08889
Reaction	White blood cell morphology abnormal	1	474.839	64.9387	3472.07	0.00217	0.08889
Reaction	Haemodilution	1	446.907	61.2274	3262.04	0.0023	0.08889
Reaction	Weight increased	1	0.10771	0.01518	0.76399	0.00236	0.08889
Reaction	Gallbladder cancer metastatic	1	410.671	56.3929	2990.64	0.0025	0.08889
Reaction	Mesenteric artery stenosis	1	361.782	49.8345	2626.42	0.00283	0.08889
Reaction	Karyotype analysis abnormal	1	337.663	46.5838	2447.56	0.00302	0.08889
Reaction	Myocardial infarction	1	0.11353	0.01601	0.80527	0.00326	0.08889
Reaction	Pneumonia adenoviral	1	303.897	42.0159	2198.06	0.00335	0.08889
Reaction	Adenoviral haemorrhagic cystitis	1	286.695	39.6812	2071.36	0.00355	0.08889
Reaction	Uvulitis	1	276.27	38.2638	1994.71	0.00368	0.08889
Reaction	Abdominal wall infection	1	266.576	36.9441	1923.52	0.00381	0.08889
Reaction	Dacryocanaliculitis	1	266.576	36.9441	1923.52	0.00381	0.08889
Reaction	Leukaemia monocytic	1	257.54	35.7124	1857.25	0.00394	0.08889
Reaction	Thromboangiitis obliterans	1	253.247	35.1268	1825.79	0.00401	0.08889
Reaction	Morganella infection	1	249.096	34.5602	1795.38	0.00407	0.08889
Reaction	Hepatic enzyme	1	237.419	32.9648	1709.95	0.00427	0.08889
Reaction	Chronic graft versus host disease in skin	1	233.767	32.4652	1683.25	0.00433	0.08889
Reaction	Scan abdomen abnormal	1	233.767	32.4652	1683.25	0.00433	0.08889
Reaction	Gastroenteritis cryptosporidial	1	226.789	31.5102	1632.27	0.00447	0.08889
Reaction	Pharyngo-oesophageal diverticulum	1	226.789	31.5102	1632.27	0.00447	0.08889
Reaction	Muscle spasms	1	0.12114	0.01708	0.8593	0.00448	0.08889
Reaction	Splenic granuloma	1	199.932	27.8266	1436.5	0.00505	0.08889
Reaction	B-cell small lymphocytic lymphoma	1	189.936	26.4522	1363.8	0.00532	0.08889
Reaction	Implant site warmth	1	185.303	25.8147	1330.14	0.00545	0.08889
Reaction	Ultrasound liver abnormal	1	185.303	25.8147	1330.14	0.00545	0.08889
Reaction	Ureteric dilatation	1	176.684	24.6276	1267.57	0.00571	0.08889
Reaction	Metastases to gastrointestinal tract	1	172.669	24.0741	1238.45	0.00584	0.08889
Reaction	Metastases to neck	1	172.669	24.0741	1238.45	0.00584	0.08889
Reaction	Essential thrombocythaemia	1	153.483	21.4256	1099.49	0.00656	0.08889
Reaction	Blast cells present	1	143.348	20.0237	1026.21	0.00702	0.08889
Reaction	Globulins decreased	1	142.008	19.8383	1016.53	0.00708	0.08889
Reaction	Metastases to the mediastinum	1	140.693	19.6562	1007.04	0.00715	0.08889
Reaction	Right ventricular systolic pressure increased	1	135.668	18.9603	970.756	0.00741	0.08889
Reaction	Granulocytes abnormal	1	133.288	18.6305	953.58	0.00754	0.08889
Reaction	Graft versus host disease in liver	1	128.77	18.0042	920.988	0.0078	0.08889
Reaction	Mediastinal disorder	1	127.688	17.8542	913.185	0.00787	0.08889
Reaction	Ultrasound kidney abnormal	1	127.688	17.8542	913.185	0.00787	0.08889
Reaction	Neoplasm prostate	1	122.539	17.1399	876.073	0.00819	0.08889
Reaction	Acute graft versus host disease in liver	1	117.789	16.4806	841.86	0.00852	0.08889
Reaction	Angiosarcoma	1	117.789	16.4806	841.86	0.00852	0.08889
Reaction	Parophthalmia	1	111.727	15.6384	798.217	0.00898	0.08889
Reaction	Tumour invasion	1	110.911	15.5251	792.349	0.00904	0.08889
Reaction	Giardiasis	1	109.315	15.3033	780.869	0.00917	0.08889
Reaction	Splenic lesion	1	106.258	14.8781	758.877	0.00943	0.08889
Reaction	Carbohydrate antigen 19-9 increased	1	104.074	14.5745	743.179	0.00963	0.08889
Reaction	Human polyomavirus infection	1	99.9661	14.0029	713.655	0.01002	0.08889
Reaction	Gastroenteritis clostridial	1	96.7824	13.5597	690.785	0.01034	0.08889
Reaction	Rectal adenocarcinoma	1	94.9678	13.307	677.754	0.01054	0.08889
Reaction	Organic brain syndrome	1	93.7953	13.1437	669.336	0.01067	0.08889
Reaction	Creutzfeldt-Jakob disease	1	88.8587	12.4559	633.907	0.01126	0.08889
Reaction	Hepatobiliary disease	1	88.8587	12.4559	633.907	0.01126	0.08889
Reaction	Blood bilirubin	1	88.3421	12.3839	630.2	0.01132	0.08889
Reaction	Parapsoriasis	1	87.3267	12.2424	622.916	0.01145	0.08889
Reaction	Arteriovenous fistula	1	83.4882	11.7071	595.388	0.01197	0.08889
Reaction	Anti-erythrocyte antibody positive	1	82.5807	11.5805	588.882	0.0121	0.08889
Reaction	Extranodal marginal zone B-cell lymphoma (MALT type)	1	79.1398	11.1005	564.22	0.01262	0.08889
Reaction	Blood immunoglobulin A decreased	1	78.3239	10.9866	558.374	0.01275	0.08889
Reaction	Venous stenosis	1	78.3239	10.9866	558.374	0.01275	0.08889
Reaction	West Nile viral infection	1	77.5247	10.8751	552.648	0.01288	0.08889
Reaction	Leukaemoid reaction	1	76.7416	10.7658	547.038	0.01301	0.08889
Reaction	Malignant peritoneal neoplasm	1	76.356	10.7119	544.276	0.01308	0.08889
Reaction	Polyserositis	1	74.8514	10.5019	533.499	0.01334	0.08889
Reaction	Diabetic hyperosmolar coma	1	73.405	10.2999	523.141	0.0136	0.08889
Reaction	Anal sphincter atony	1	72.7026	10.2018	518.112	0.01373	0.08889
Reaction	Exercise lack of	1	72.3564	10.1534	515.633	0.01379	0.08889
Reaction	Hypergammaglobulinaemia benign monoclonal	1	71.0039	9.96452	505.951	0.01405	0.08889
Reaction	Refractory cytopenia with unilineage dysplasia	1	67.8341	9.52162	483.265	0.0147	0.08889
Reaction	Skin turgor decreased	1	67.5326	9.47948	481.108	0.01476	0.08889
Reaction	Acinetobacter infection	1	64.3849	9.03947	458.591	0.01548	0.08889
Reaction	Injection site thrombosis	1	64.1133	9.00149	456.648	0.01554	0.08889
Reaction	Blood lactate dehydrogenase abnormal	1	62.7886	8.81626	447.175	0.01586	0.08889
Reaction	Rash papulosquamous	1	62.2739	8.74429	443.495	0.01599	0.08889
Reaction	Stenotrophomonas infection	1	62.0198	8.70874	441.677	0.01606	0.08889
Reaction	Meningeal disorder	1	61.5176	8.6385	438.087	0.01619	0.08889
Reaction	Haematoma infection	1	60.7794	8.53524	432.809	0.01638	0.08889
Reaction	Systemic mycosis	1	59.8222	8.40135	425.967	0.01664	0.08889
Reaction	Blood alkaline phosphatase abnormal	1	56.6972	7.96408	403.634	0.01755	0.08889
Reaction	Lymphocytic infiltration	1	53.692	7.54341	382.166	0.01852	0.08889
Reaction	Metastases to adrenals	1	52.5773	7.38733	374.205	0.0189	0.08889
Reaction	Fungal sepsis	1	52.396	7.36194	372.91	0.01897	0.08889
Reaction	Cauda equina syndrome	1	50.4812	7.09378	359.238	0.01968	0.08889
Reaction	Gallbladder polyp	1	50.3141	7.07036	358.044	0.01974	0.08889
Reaction	Enterococcal sepsis	1	48.7014	6.84446	346.533	0.02039	0.08889
Reaction	Complications of transplant surgery	1	48.5458	6.82266	345.422	0.02045	0.08889
Reaction	Central nervous system lymphoma	1	48.0849	6.75809	342.132	0.02065	0.08889
Reaction	Parainfluenzae virus infection	1	47.6327	6.69473	338.905	0.02084	0.08889
Reaction	Keratopathy	1	46.7534	6.57151	332.63	0.02123	0.08889
Reaction	Gastrointestinal neoplasm	1	46.1849	6.49185	328.573	0.02148	0.08889
Reaction	Hypertrophy	1	46.1849	6.49185	328.573	0.02148	0.08889
Reaction	Genital discomfort	1	46.045	6.47223	327.575	0.02155	0.08889
Reaction	Neutrophil count	1	44.4294	6.24579	316.048	0.02232	0.08889
Reaction	Pneumonia pseudomonal	1	44.043	6.19163	313.292	0.02251	0.08889
Reaction	Radiation pneumonitis	1	44.043	6.19163	313.292	0.02251	0.08889
Reaction	Viral rash	1	44.043	6.19163	313.292	0.02251	0.08889
Reaction	Diffuse alveolar damage	1	41.0671	5.77438	292.068	0.02412	0.08889
Reaction	Catheter site related reaction	1	39.6732	5.57889	282.129	0.02495	0.08889
Reaction	Microangiopathy	1	39.3649	5.53564	279.93	0.02515	0.08889
Reaction	Graft versus host disease in skin	1	39.0613	5.49306	277.766	0.02534	0.08889
Reaction	Myelodysplastic syndrome transformation	1	38.8615	5.46503	276.342	0.02547	0.08889
Reaction	Bowen's disease	1	38.6637	5.43729	274.932	0.0256	0.08889
Reaction	Aspartate aminotransferase abnormal	1	38.178	5.36915	271.47	0.02592	0.08889
Reaction	Skin fragility	1	36.0067	5.0645	255.995	0.02745	0.08889
Reaction	Laryngeal cancer	1	35.7526	5.02883	254.184	0.02765	0.08889
Reaction	Malignant melanoma in situ	1	35.502	4.99367	252.398	0.02784	0.08889
Reaction	Carbohydrate antigen 125 increased	1	35.1733	4.94753	250.055	0.02809	0.08889
Reaction	Graft complication	1	34.0692	4.79257	242.189	0.02899	0.08889
Reaction	Sputum culture positive	1	33.7663	4.75006	240.031	0.02924	0.08889
Reaction	Mitral valve calcification	1	33.4688	4.7083	237.912	0.0295	0.08889
Reaction	Lymphocytic leukaemia	1	33.322	4.6877	236.866	0.02963	0.08889
Reaction	Neuromyopathy	1	32.607	4.58731	231.773	0.03027	0.08889
Reaction	Intestinal infarction	1	31.855	4.48174	226.417	0.03097	0.08889
Reaction	Intraductal proliferative breast lesion	1	31.3943	4.41706	223.136	0.03141	0.08889
Reaction	Peripheral sensorimotor neuropathy	1	30.9467	4.35421	219.948	0.03186	0.08889
Reaction	Skin graft	1	30.9467	4.35421	219.948	0.03186	0.08889
Reaction	Marrow hyperplasia	1	30.5731	4.30175	217.288	0.03224	0.08889
Reaction	Salmonellosis	1	29.9111	4.20878	212.573	0.03294	0.08889
Reaction	Infectious pleural effusion	1	28.9426	4.07275	205.677	0.03402	0.08889
Reaction	Waist circumference increased	1	28.9426	4.07275	205.677	0.03402	0.08889
Reaction	Beta haemolytic streptococcal infection	1	27.5769	3.88091	195.955	0.03568	0.08889
Reaction	Tumour pain	1	27.5769	3.88091	195.955	0.03568	0.08889
Reaction	Ureteric obstruction	1	26.7515	3.76496	190.08	0.03675	0.08889
Reaction	Biopsy skin abnormal	1	26.4718	3.72567	188.09	0.03713	0.08889
Reaction	Blood electrolytes abnormal	1	26.4718	3.72567	188.09	0.03713	0.08889
Reaction	Aplasia	1	26.0632	3.66825	185.181	0.0377	0.08889
Reaction	Incision site complication	1	25.9741	3.65573	184.547	0.03783	0.08889
Reaction	VIth nerve paralysis	1	25.7104	3.61868	182.67	0.03821	0.08889
Reaction	PO2 decreased	1	25.2826	3.55856	179.626	0.03884	0.08889
Reaction	Adenocarcinoma pancreas	1	25.074	3.52925	178.141	0.03916	0.08889
Reaction	Hepatic congestion	1	25.074	3.52925	178.141	0.03916	0.08889
Reaction	Tonsillar disorder	1	24.9096	3.50615	176.971	0.03941	0.08889
Reaction	Transfusion reaction	1	24.627	3.46643	174.96	0.03986	0.08889
Reaction	Staphylococcal skin infection	1	24.2729	3.41667	172.441	0.04042	0.08889
Reaction	Febrile bone marrow aplasia	1	24.1571	3.4004	171.617	0.04061	0.08889
Reaction	Electrocardiogram ST segment abnormal	1	24.1188	3.39501	171.344	0.04068	0.08889
Reaction	Pneumoperitoneum	1	23.9289	3.36832	169.993	0.04099	0.08889
Reaction	Lip haemorrhage	1	23.7049	3.33684	168.4	0.04137	0.08889
Reaction	BK virus infection	1	23.305	3.28063	165.554	0.04206	0.08889
Reaction	Axillary mass	1	22.5443	3.1737	160.143	0.04345	0.08889
Reaction	Cytomegalovirus test positive	1	22.5109	3.16901	159.905	0.04351	0.08889
Reaction	Pneumocystis jirovecii infection	1	22.4776	3.16433	159.668	0.04358	0.08889
Reaction	Renal mass	1	20.7014	2.91462	147.034	0.04722	0.08889
Reaction	Small cell lung cancer	1	20.4507	2.87936	145.251	0.04778	0.08889
Reaction	Pneumonia legionella	1	20.2868	2.85632	144.086	0.04816	0.08889
Reaction	Myeloproliferative neoplasm	1	20.2059	2.84494	143.51	0.04835	0.08889
Reaction	Mean cell volume increased	1	20.0724	2.82618	142.561	0.04866	0.08889
Reaction	Genital ulceration	1	19.4307	2.73594	137.998	0.05022	0.08889
Reaction	Adhesion	1	19.3812	2.72897	137.645	0.05035	0.08889
Reaction	Culture positive	1	19.2584	2.7117	136.772	0.05066	0.08889
Reaction	Clostridium colitis	1	18.263	2.57171	129.695	0.05335	0.08889
Reaction	Telangiectasia	1	17.9608	2.5292	127.546	0.05422	0.08889
Reaction	Catheter site erythema	1	17.5056	2.46517	124.31	0.05559	0.08889
Reaction	Post herpetic neuralgia	1	17.1887	2.4206	122.057	0.05658	0.08889
Reaction	Subileus	1	17.0921	2.407	121.37	0.05689	0.08889
Reaction	Pneumonia fungal	1	17.0729	2.4043	121.234	0.05695	0.08889
Reaction	Dilatation atrial	1	17.0155	2.39623	120.826	0.05714	0.08889
Reaction	Transplant failure	1	16.9775	2.39089	120.556	0.05726	0.08889
Reaction	Accidental death	1	16.3561	2.30348	116.139	0.05937	0.08889
Reaction	Brain natriuretic peptide increased	1	16.286	2.29361	115.64	0.05962	0.08889
Reaction	Acute febrile neutrophilic dermatosis	1	16.0622	2.26212	114.05	0.06042	0.08889
Reaction	Pemphigus	1	16.0622	2.26212	114.05	0.06042	0.08889
Reaction	White blood cell count	1	15.9108	2.24083	112.974	0.06098	0.08889
Reaction	Lung consolidation	1	15.3638	2.16387	109.086	0.06308	0.08889
Reaction	Blood phosphorus increased	1	15.0892	2.12523	107.134	0.06419	0.08889
Reaction	Bilirubin conjugated increased	1	14.8969	2.09817	105.767	0.06499	0.08889
Reaction	Culture urine positive	1	14.5964	2.05588	103.632	0.06628	0.08889
Reaction	Normochromic normocytic anaemia	1	14.3078	2.01526	101.581	0.06757	0.08889
Reaction	Cardiac failure chronic	1	14.1479	1.99277	100.445	0.0683	0.08889
Reaction	Liver abscess	1	13.9275	1.96174	98.8782	0.06934	0.08889
Reaction	Ejection fraction abnormal	1	13.6277	1.91956	96.748	0.07081	0.08889
Reaction	Blood creatinine abnormal	1	13.4706	1.89745	95.632	0.07161	0.08889
Reaction	Loss of consciousness	1	0.19753	0.02785	1.40111	0.07188	0.08889
Reaction	Abdominal mass	1	13.2938	1.87257	94.3759	0.07252	0.08889
Reaction	Exophthalmos	1	13.2938	1.87257	94.3759	0.07252	0.08889
Reaction	Bile duct obstruction	1	13.2244	1.8628	93.8827	0.07289	0.08889
Reaction	Cerebellar infarction	1	13.2244	1.8628	93.8827	0.07289	0.08889
Reaction	Wound infection staphylococcal	1	13.1671	1.85474	93.4756	0.0732	0.08889
Reaction	Rectal cancer	1	13.0316	1.83567	92.5127	0.07393	0.08889
Reaction	Gastrointestinal carcinoma	1	12.987	1.8294	92.1962	0.07417	0.08889
Reaction	Acute prerenal failure	1	12.9428	1.82317	91.8818	0.07441	0.08889
Reaction	Metabolic encephalopathy	1	12.6835	1.78667	90.0396	0.07588	0.08889
Reaction	Gastrointestinal tube insertion	1	12.2342	1.72343	86.8473	0.07855	0.08889
Reaction	Klebsiella infection	1	12.069	1.70017	85.6737	0.07958	0.08889
Reaction	Hypoproteinaemia	1	11.5903	1.63279	82.2729	0.08272	0.08889
Reaction	Diastolic dysfunction	1	11.4938	1.61921	81.5879	0.08339	0.08889
Reaction	Mucosal dryness	1	11.4419	1.6119	81.219	0.08375	0.08889
Reaction	Blood pH decreased	1	11.2305	1.58214	79.7172	0.08525	0.08889
Reaction	Aortic arteriosclerosis	1	11.1974	1.57748	79.482	0.0855	0.08889
Reaction	Peripheral venous disease	1	10.9869	1.54785	77.9867	0.08706	0.08889
Reaction	Hepatorenal syndrome	1	10.8535	1.52906	77.0391	0.08808	0.08889
Reaction	Nuchal rigidity	1	10.7995	1.52146	76.6555	0.0885	0.08889
Reaction	Pancreatic carcinoma metastatic	1	10.6332	1.49805	75.4746	0.08982	0.08889
Reaction	Echocardiogram abnormal	1	10.5373	1.48456	74.7937	0.0906	0.08889
Reaction	Prostatitis	1	10.246	1.44354	72.7245	0.09305	0.08889
Reaction	Diverticulum intestinal	1	10.2253	1.44063	72.5776	0.09323	0.08889
Reaction	Oral fungal infection	1	10.1706	1.43292	72.1887	0.0937	0.08889
Reaction	Hepatic neoplasm	1	9.97692	1.40565	70.8133	0.09543	0.08889
Reaction	Chronic lymphocytic leukaemia	1	9.87319	1.39105	70.0766	0.09638	0.08889
Reaction	Calcinosis	1	9.86038	1.38924	69.9856	0.0965	0.08889
Reaction	Orthopnoea	1	9.73404	1.37146	69.0884	0.09769	0.08889
Reaction	No reaction on previous exposure to drug	1	9.57457	1.349	67.9558	0.09923	0.08889
Reaction	Anaemia macrocytic	1	9.5445	1.34477	67.7422	0.09953	0.08889
Reaction	Pelvic venous thrombosis	1	9.52058	1.3414	67.5723	0.09977	0.08889
Reaction	Gastric ulcer perforation	1	8.773	1.23613	62.2634	0.10779	0.08889
Reaction	Cardiac failure acute	1	8.72264	1.22904	61.9058	0.10838	0.08889
Reaction	Haemothorax	1	8.61874	1.21441	61.168	0.10961	0.08889
Reaction	Epstein-Barr virus infection	1	8.59923	1.21166	61.0294	0.10984	0.08889
Reaction	Platelet count abnormal	1	8.4182	1.18616	59.7439	0.11207	0.08889
Reaction	Snoring	1	8.25807	1.16361	58.6069	0.11411	0.08889
Reaction	Facial bones fracture	1	8.143	1.14741	57.7898	0.11562	0.08889
Reaction	White blood cell count abnormal	1	8.04812	1.13404	57.1161	0.1169	0.08889
Reaction	Skin toxicity	1	7.92223	1.11632	56.2223	0.11865	0.08889
Reaction	Immobile	1	7.78823	1.09744	55.2708	0.12056	0.08889
Reaction	Respiratory syncytial virus infection	1	7.69749	1.08466	54.6265	0.12189	0.08889
Reaction	Intracardiac thrombus	1	7.54461	1.06313	53.541	0.1242	0.08889
Reaction	Infusion site reaction	1	7.53712	1.06208	53.4879	0.12431	0.08889
Reaction	Lymphocytosis	1	7.48514	1.05476	53.1189	0.12512	0.08889
Reaction	Abdominal hernia	1	7.4741	1.0532	53.0404	0.12529	0.08889
Reaction	Bundle branch block left	1	7.31224	1.0304	51.8913	0.12788	0.08889
Reaction	Protein urine present	1	7.20818	1.01575	51.1524	0.1296	0.08889
Reaction	Duodenitis	1	7.12036	1.00338	50.5289	0.13109	0.08889
Reaction	Nuclear magnetic resonance imaging brain abnormal	1	6.99901	0.98628	49.6674	0.1332	0.08889
Reaction	White blood cell disorder	1	6.95098	0.97952	49.3264	0.13406	0.08889
Reaction	Thrombotic microangiopathy	1	6.92564	0.97595	49.1465	0.13451	0.08889
Reaction	Haemoglobin abnormal	1	6.91933	0.97506	49.1017	0.13463	0.08889
Reaction	Staphylococcal sepsis	1	6.84761	0.96496	48.5925	0.13593	0.08889
Reaction	Congestive cardiomyopathy	1	6.82914	0.96236	48.4614	0.13628	0.08889
Reaction	Cystitis haemorrhagic	1	6.78644	0.95634	48.1583	0.13707	0.08889
Reaction	Breath sounds abnormal	1	6.68199	0.94163	47.4168	0.13906	0.08889
Reaction	Immunodeficiency	1	6.58926	0.92857	46.7585	0.14087	0.08889
Reaction	Hepatic function abnormal	1	0.23574	0.03323	1.67219	0.14148	0.08889
Reaction	Immune reconstitution inflammatory syndrome	1	6.54386	0.92217	46.4361	0.14177	0.08889
Reaction	Inguinal hernia	1	6.46039	0.91041	45.8436	0.14347	0.08889
Reaction	Occult blood positive	1	6.34705	0.89445	45.039	0.14583	0.08889
Reaction	Streptococcal infection	1	6.32855	0.89184	44.9076	0.14622	0.08889
Reaction	Joint crepitation	1	6.32328	0.8911	44.8702	0.14634	0.08889
Reaction	Granuloma	1	6.31015	0.88925	44.777	0.14662	0.08889
Reaction	Aplasia pure red cell	1	6.26075	0.88229	44.4263	0.14768	0.08889
Reaction	Incorrect dose administered	1	0.22102	0.03116	1.56774	0.14772	0.08889
Reaction	Wound secretion	1	6.11709	0.86205	43.4065	0.15087	0.08889
Reaction	Infusion site extravasation	1	5.93781	0.8368	42.1338	0.15506	0.08889
Reaction	Left ventricular failure	1	5.91239	0.83322	41.9534	0.15567	0.08889
Reaction	Clostridial infection	1	5.75562	0.81113	40.8406	0.15955	0.08889
Reaction	Thyroid cancer	1	5.70591	0.80413	40.4878	0.16082	0.08889
Reaction	Purulent discharge	1	5.66338	0.79814	40.1858	0.16192	0.08889
Reaction	Haemorrhoidal haemorrhage	1	5.60075	0.78932	39.7413	0.16358	0.08889
Reaction	Metastasis	1	5.19837	0.73263	36.8852	0.17506	0.08889
Reaction	Infusion site erythema	1	5.15779	0.72691	36.5971	0.17631	0.08889
Reaction	Diabetic neuropathy	1	5.15429	0.72642	36.5723	0.17642	0.08889
Reaction	Meningitis aseptic	1	5.08699	0.71693	36.0946	0.17853	0.08889
Reaction	Vulvovaginal mycotic infection	1	5.07849	0.71574	36.0343	0.1788	0.08889
Reaction	Thrombotic thrombocytopenic purpura	1	4.99174	0.70351	35.4185	0.1816	0.08889
Reaction	Gastric cancer	1	4.93179	0.69507	34.993	0.18359	0.08889
Reaction	Blood magnesium decreased	1	4.8207	0.67942	34.2045	0.1874	0.08889
Reaction	Activated partial thromboplastin time prolonged	1	4.81612	0.67877	34.172	0.18756	0.08889
Reaction	Dysgraphia	1	4.7145	0.66445	33.4508	0.19119	0.08889
Reaction	Viral upper respiratory tract infection	1	4.62834	0.65231	32.8393	0.19438	0.08889
Reaction	Skin atrophy	1	4.5685	0.64388	32.4146	0.19665	0.08889
Reaction	Crying	1	0.25895	0.03651	1.83679	0.19825	0.08889
Reaction	Cerebral ischaemia	1	4.49685	0.63379	31.906	0.19945	0.08889
Reaction	Ovarian cancer	1	4.4849	0.6321	31.8212	0.19993	0.08889
Reaction	Renal cancer	1	4.39666	0.61967	31.195	0.2035	0.08889
Reaction	Orbital oedema	1	4.32163	0.6091	30.6625	0.20664	0.08889
Reaction	Metastases to lung	1	4.2984	0.60583	30.4976	0.20763	0.08889
Reaction	Leukaemia	1	4.25031	0.59905	30.1563	0.20971	0.08889
Reaction	Nerve compression	1	4.12343	0.58117	29.2559	0.21542	0.08889
Reaction	Hepatic necrosis	1	4.12008	0.5807	29.2321	0.21557	0.08889
Reaction	Incoherent	1	4.10782	0.57897	29.1451	0.21614	0.08889
Reaction	Hepatic encephalopathy	1	4.09454	0.5771	29.0508	0.21676	0.08889
Reaction	Thrombocytopenic purpura	1	4.05954	0.57217	28.8024	0.2184	0.08889
Reaction	Peripheral sensory neuropathy	1	3.88416	0.54746	27.5578	0.22705	0.08889
Reaction	Oral mucosal blistering	1	3.86637	0.54495	27.4316	0.22797	0.08889
Reaction	Ear disorder	1	3.86441	0.54467	27.4176	0.22807	0.08889
Reaction	Blood disorder	1	3.86244	0.5444	27.4037	0.22817	0.08889
Reaction	Haemodialysis	1	3.80919	0.53689	27.0257	0.23096	0.08889
Reaction	Muscle strain	1	3.7723	0.53169	26.764	0.23293	0.08889
Reaction	Arteriosclerosis coronary artery	1	3.74073	0.52725	26.5399	0.23465	0.08889
Reaction	Pulmonary mass	1	3.49146	0.49212	24.771	0.24912	0.08889
Reaction	Skin infection	1	3.47549	0.48987	24.6577	0.25011	0.08889
Reaction	Feeding disorder	1	3.35279	0.47258	23.787	0.25796	0.08889
Reaction	Aortic valve incompetence	1	3.30538	0.4659	23.4505	0.26113	0.08889
Reaction	Neurotoxicity	1	3.14398	0.44315	22.3052	0.27252	0.08889
Reaction	Hypertensive crisis	1	3.12201	0.44006	22.1494	0.27415	0.08889
Reaction	Nuclear magnetic resonance imaging abnormal	1	3.11689	0.43933	22.113	0.27453	0.08889
Reaction	Blood calcium increased	1	3.07526	0.43347	21.8176	0.27767	0.08889
Reaction	Bladder disorder	1	3.07463	0.43338	21.8132	0.27772	0.08889
Reaction	Metastases to bone	1	3.07215	0.43303	21.7955	0.27791	0.08889
Reaction	Hepatic enzyme increased	1	0.28062	0.03956	1.99053	0.27948	0.08889
Reaction	Blood testosterone decreased	1	3.04872	0.42973	21.6293	0.27972	0.08889
Reaction	Acute hepatic failure	1	3.02505	0.42639	21.4613	0.28156	0.08889
Reaction	Thermal burn	1	2.93734	0.41403	20.8389	0.28862	0.08889
Reaction	Pericarditis	1	2.81856	0.39729	19.9961	0.29876	0.08889
Reaction	Tooth abscess	1	2.78856	0.39306	19.7832	0.30143	0.08889
Reaction	Immune system disorder	1	2.70805	0.38172	19.2119	0.30884	0.08889
Reaction	Small intestinal obstruction	1	2.63433	0.37133	18.6889	0.31595	0.08889
Reaction	Herpes simplex	1	2.58856	0.36488	18.3641	0.32052	0.08889
Reaction	Malignant melanoma	1	2.56974	0.36222	18.2305	0.32245	0.08889
Reaction	Hypomagnesaemia	1	2.5499	0.35943	18.0898	0.32449	0.08889
Reaction	Acute respiratory failure	1	2.54819	0.35919	18.0776	0.32467	0.08889
Reaction	Blood count abnormal	1	2.53247	0.35697	17.9661	0.32632	0.08889
Reaction	Blindness unilateral	1	2.51695	0.35479	17.856	0.32795	0.08889
Reaction	Scab	1	2.45355	0.34585	17.4062	0.33482	0.08889
Reaction	Subarachnoid haemorrhage	1	2.44802	0.34507	17.3669	0.33543	0.08889
Reaction	Nodule	1	2.44369	0.34446	17.3361	0.33591	0.08889
Reaction	Pulmonary congestion	1	2.43234	0.34286	17.2557	0.33718	0.08889
Reaction	Right ventricular failure	1	2.42265	0.34149	17.1869	0.33827	0.08889
Reaction	Ventricular extrasystoles	1	2.40997	0.33971	17.0969	0.33971	0.08889
Reaction	Blood pressure systolic increased	1	2.36312	0.3331	16.7645	0.34512	0.08889
Reaction	Hiatus hernia	1	2.31841	0.3268	16.4473	0.35044	0.08889
Reaction	Joint range of motion decreased	1	2.26181	0.31883	16.0457	0.35742	0.08889
Reaction	Cholecystitis	1	2.25276	0.31755	15.9815	0.35856	0.08889
Reaction	Ulcer	1	2.20952	0.31146	15.6746	0.36411	0.08889
Reaction	Skin mass	1	2.20791	0.31123	15.6633	0.36432	0.08889
Reaction	Dental caries	1	2.17162	0.30612	15.4058	0.36911	0.08889
Reaction	Micturition urgency	1	2.15499	0.30377	15.2878	0.37135	0.08889
Reaction	Central nervous system lesion	1	2.15011	0.30308	15.2532	0.37201	0.08889
Reaction	Laryngeal pain	1	2.10601	0.29687	14.9402	0.3781	0.08889
Reaction	Clostridium difficile infection	1	2.10309	0.29646	14.9196	0.37851	0.08889
Reaction	Musculoskeletal pain	1	0.33733	0.04756	2.39281	0.38268	0.08889
Reaction	Lethargy	1	0.33308	0.04696	2.36265	0.38329	0.08889
Reaction	Injury	1	0.31626	0.04459	2.24334	0.38824	0.08889
Reaction	Balance disorder	1	0.30789	0.04341	2.18397	0.39239	0.08889
Reaction	Parosmia	1	1.96468	0.27695	13.9375	0.399	0.08889
Reaction	Supraventricular tachycardia	1	1.96468	0.27695	13.9375	0.399	0.08889
Reaction	Gastroenteritis viral	1	1.9354	0.27282	13.7298	0.40361	0.08889
Reaction	Myocardial ischaemia	1	1.90483	0.26851	13.5129	0.40853	0.08889
Reaction	Blood potassium increased	1	1.87544	0.26437	13.3044	0.41338	0.08889
Reaction	Eye haemorrhage	1	1.87267	0.26398	13.2847	0.41385	0.08889
Reaction	Osteomyelitis	1	1.86257	0.26256	13.2131	0.41554	0.08889
Reaction	Sinus disorder	1	1.83646	0.25888	13.0278	0.41999	0.08889
Reaction	Neoplasm progression	1	1.81604	0.256	12.883	0.42353	0.08889
Reaction	Rib fracture	1	1.78301	0.25134	12.6486	0.42938	0.08889
Reaction	Hepatitis C	1	1.66647	0.23492	11.8218	0.45134	0.08889
Reaction	Injection site nodule	1	1.64464	0.23184	11.6669	0.45569	0.08889
Reaction	Post procedural complication	1	1.6246	0.22901	11.5247	0.45977	0.08889
Reaction	Glycosylated haemoglobin increased	1	1.58379	0.22326	11.2352	0.46827	0.08889
Reaction	Electrocardiogram abnormal	1	1.46782	0.20692	10.4124	0.49416	0.08889
Reaction	Hiccups	1	1.39993	0.19735	9.9308	0.51061	0.08889
Reaction	Anhedonia	1	1.39658	0.19687	9.90707	0.51144	0.08889
Reaction	Bone disorder	1	1.39262	0.19632	9.87892	0.51244	0.08889
Reaction	Fluid overload	1	1.38223	0.19485	9.80522	0.51507	0.08889
Reaction	Gallbladder disorder	1	1.34183	0.18916	9.51859	0.52552	0.08889
Reaction	Rheumatoid arthritis	1	0.40175	0.05664	2.84972	0.52916	0.08889
Reaction	Blister	1	0.39846	0.05617	2.8264	0.52934	0.08889
Reaction	Rash generalised	1	0.39819	0.05614	2.82448	0.52935	0.08889
Reaction	Cardiac failure	1	0.39641	0.05589	2.81187	0.52948	0.08889
Reaction	Vaginal haemorrhage	1	0.39399	0.05554	2.79467	0.52969	0.08889
Reaction	Dysphonia	1	0.38372	0.0541	2.72183	0.53106	0.08889
Reaction	Swelling face	1	0.37687	0.05313	2.67323	0.53243	0.08889
Reaction	Facial paralysis	1	1.31035	0.18472	9.2953	0.53395	0.08889
Reaction	Injection site warmth	1	0.36392	0.0513	2.58141	0.53613	0.08889
Reaction	Pancreatitis	1	0.36123	0.05093	2.56233	0.53709	0.08889
Reaction	Bronchospasm	1	0.35851	0.05054	2.54304	0.53813	0.08889
Reaction	Rash pustular	1	1.28281	0.18084	9.09988	0.54153	0.08889
Reaction	Oral pain	1	1.26634	0.17852	8.98308	0.54615	0.08889
Reaction	Hallucination, visual	1	1.25422	0.17681	8.89706	0.54961	0.08889
Reaction	Lactic acidosis	1	1.23565	0.17419	8.76537	0.55497	0.08889
Reaction	C-reactive protein increased	1	1.19833	0.16893	8.50059	0.56606	0.08889
Reaction	Hyperlipidaemia	1	1.18663	0.16728	8.41761	0.56961	0.08889
Reaction	Laryngeal oedema	1	1.17371	0.16546	8.32592	0.57359	0.08889
Reaction	Abscess	1	1.16311	0.16396	8.25071	0.57689	0.08889
Reaction	Neuralgia	1	1.15568	0.16292	8.198	0.57923	0.08889
Reaction	Ill-defined disorder	1	1.15454	0.16276	8.1899	0.57959	0.08889
Reaction	Coagulopathy	1	1.15305	0.16255	8.17933	0.58006	0.08889
Reaction	Dysstasia	1	1.10084	0.15519	7.80894	0.59699	0.08889
Reaction	Shock	1	1.09591	0.15449	7.77402	0.59864	0.08889
Reaction	Pain in jaw	1	1.05198	0.1483	7.46237	0.61365	0.08889
Reaction	Pulmonary hypertension	1	1.03549	0.14598	7.3454	0.61946	0.08889
Reaction	Hyperbilirubinaemia	1	1.02765	0.14487	7.28976	0.62226	0.08889
Reaction	Breast cancer female	1	1.02308	0.14423	7.25736	0.6239	0.08889
Reaction	Dysuria	1	0.49109	0.06923	3.48349	0.72917	0.08889
Reaction	International normalised ratio increased	1	0.48866	0.06889	3.46624	0.72922	0.08889
Reaction	Nasal congestion	1	0.47261	0.06663	3.35238	0.72996	0.08889
Reaction	Blood creatine phosphokinase increased	1	0.44554	0.06281	3.1604	0.7328	0.08889
Reaction	Dry skin	1	0.44071	0.06213	3.12612	0.73355	0.08889
Reaction	Dyskinesia	1	0.41586	0.05863	2.94986	0.73871	0.08889
Reaction	Impaired healing	1	0.99973	0.14093	7.09166	1	0.08889
Reaction	Unresponsive to stimuli	1	0.99352	0.14006	7.04761	1	0.08889
Reaction	Faeces discoloured	1	0.98323	0.13861	6.97464	1	0.08889
Reaction	Gastric ulcer	1	0.97565	0.13754	6.92089	1	0.08889
Reaction	Productive cough	1	0.9466	0.13344	6.71479	1	0.08889
Reaction	Intestinal obstruction	1	0.94472	0.13318	6.70143	1	0.08889
Reaction	Tongue oedema	1	0.9298	0.13108	6.59562	1	0.08889
Reaction	Laboratory test abnormal	1	0.90661	0.12781	6.43112	1	0.08889
Reaction	Transaminases increased	1	0.90172	0.12712	6.39638	1	0.08889
Reaction	Abdominal pain lower	1	0.90012	0.12689	6.38502	1	0.08889
Reaction	Gastric disorder	1	0.88626	0.12494	6.28669	1	0.08889
Reaction	Apnoea	1	0.87057	0.12273	6.17539	1	0.08889
Reaction	Cardiac flutter	1	0.85187	0.12009	6.04278	1	0.08889
Reaction	Movement disorder	1	0.84911	0.1197	6.0232	1	0.08889
Reaction	Tachypnoea	1	0.83141	0.11721	5.89762	1	0.08889
Reaction	Dry eye	1	0.83109	0.11716	5.89537	1	0.08889
Reaction	Aphasia	1	0.79683	0.11233	5.65235	1	0.08889
Reaction	Eosinophilia	1	0.78389	0.11051	5.5605	1	0.08889
Reaction	Ageusia	1	0.74342	0.1048	5.27347	1	0.08889
Reaction	Respiratory disorder	1	0.72905	0.10278	5.17149	1	0.08889
Reaction	Viral infection	1	0.72222	0.10182	5.12307	1	0.08889
Reaction	Muscle twitching	1	0.71351	0.10059	5.06124	1	0.08889
Reaction	Delirium	1	0.70311	0.09912	4.98746	1	0.08889
Reaction	Skin disorder	1	0.67416	0.09504	4.78211	1	0.08889
Reaction	Oxygen saturation decreased	1	0.6591	0.09292	4.67528	1	0.08889
Reaction	Dysarthria	1	0.60106	0.08474	4.26358	1	0.08889
Reaction	Haematemesis	1	0.59473	0.08384	4.21869	1	0.08889
Reaction	Loss of personal independence in daily activities	1	0.59267	0.08355	4.20405	1	0.08889
Reaction	Mouth ulceration	1	0.57954	0.0817	4.11088	1	0.08889
Reaction	Urinary retention	1	0.57222	0.08067	4.05902	1	0.08889
Reaction	Adverse drug reaction	1	0.56392	0.0795	4.00012	1	0.08889
Reaction	Erythema multiforme	1	0.54922	0.07743	3.89587	1	0.08889
Reaction	Haematoma	1	0.5432	0.07658	3.85311	1	0.08889
Reaction	Ocular hyperaemia	1	0.53997	0.07612	3.83024	1	0.08889
Reaction	Cerebral haemorrhage	1	0.50744	0.07154	3.59948	1	0.08889
Serious	TRUE	919	2.51166	2.4431	2.58214	0	81.6889
Serious	FALSE	170	0.3606	0.31396	0.41417	0	15.1111
